# Supplementary material for: Development and validation of prognostic nomogram for germ cell testicular cancer patients
Source: Aging (Albany NY). 2020 Nov 2;12(21):22095–111. doi: 10.18632/aging.104063 (PMC7695357; doi:10.18632/aging.104063)
Supplement: Supplementary Data [file aging-12-104063-s002..xlsx]

## Sheet: All
Patient ID	Year of diagnosis	Age at diagnosis	Age4	Race	AJCC_stage	T_stage	N_stage	M_stage	SEER_stage	Surgery	Radiotherapy	CSS	Survival_months	OS
2922691	2004	47	41-60	White	I	T1	N0	M0	Localized	Yes	Yes	Alive	151	Alive
2923880	2004	21	21-40	White	I	T1	N0	M0	Localized	Yes	No/Unknown	Alive	152	Alive
2924141	2004	31	21-40	White	I	T1	N0	M0	Localized	Yes	Yes	Alive	155	Alive
2924609	2004	49	41-60	White	I	T1	N0	M0	Localized	Yes	No/Unknown	Alive	151	Alive
2924810	2004	34	21-40	White	I	T1	N0	M0	Localized	Yes	Yes	Alive	155	Alive
2924825	2004	30	21-40	White	I	T3	N0	M0	Regional	Yes	No/Unknown	Alive	155	Alive
2925839	2004	32	21-40	White	I	T1	N0	M0	Regional	Yes	Yes	Alive	152	Alive
2925927	2004	20	0-20	White	I	T1	N0	M0	Localized	Yes	Yes	Alive	152	Alive
2925956	2004	39	21-40	White	III	T1	N1	M1	Distant	Yes	No/Unknown	Alive	152	Alive
2940795	2004	43	41-60	Black	I	T1	N0	M0	Localized	Yes	No/Unknown	Alive	155	Alive
2940876	2004	34	21-40	White	I	T1	N0	M0	Localized	Yes	No/Unknown	Symptoms, Signs and Ill-Defined Conditions	43	Dead
2940906	2004	30	21-40	White	I	T1	N0	M0	Localized	Yes	No/Unknown	Alive	153	Alive
2941056	2004	30	21-40	White	I	T1	N0	M0	Localized	Yes	Yes	Alive	152	Alive
2941110	2004	46	41-60	White	I	T1	N0	M0	Localized	Yes	Yes	Alive	149	Alive
2941523	2004	37	21-40	White	I	T1	N0	M0	Localized	Yes	No/Unknown	Alive	151	Alive
2941643	2004	44	41-60	White	I	T1	N0	M0	Localized	Yes	No/Unknown	Alive	155	Alive
2941870	2004	52	41-60	White	I	T1	N0	M0	Localized	Yes	Yes	Diseases of Heart	135	Dead
2959216	2010	58	41-60	White	I	T1	N0	M0	Localized	Yes	No/Unknown	Alive	75	Alive
2961900	2004	32	21-40	White	I	T1	N0	M0	Localized	Yes	Yes	Alive	151	Alive
2961901	2004	37	21-40	White	I	T1	N0	M0	Localized	Yes	Yes	Alive	150	Alive
2962598	2004	1	0-20	Others	I	T1	N0	M0	Localized	Yes	No/Unknown	Alive	44	Alive
2965528	2004	34	21-40	White	III	T1	N3	M0	Regional	Yes	No/Unknown	Alive	148	Alive
2966030	2004	17	0-20	White	III	T2	N0	M1	Distant	Yes	No/Unknown	Alive	148	Alive
2966096	2004	27	21-40	White	I	T2	N0	M0	Localized	Yes	Yes	Alive	146	Alive
2969283	2005	33	21-40	White	I	T1	N0	M0	Localized	Yes	Yes	Alive	143	Alive
2973559	2004	28	21-40	White	I	T4	N0	M0	Regional	Yes	No/Unknown	Alive	150	Alive
2973914	2004	40	21-40	White	III	T2	N1	M1	Distant	Yes	Yes	Alive	150	Alive
2973954	2004	28	21-40	White	III	T3	N1	M1	Distant	Yes	No/Unknown	Alive	151	Alive
2973957	2004	42	41-60	White	III	T1	N0	M1	Distant	Yes	No/Unknown	Alive	152	Alive
2974035	2004	25	21-40	White	I	T1	N0	M0	Localized	Yes	No/Unknown	Alive	142	Alive
2974064	2004	15	0-20	White	III	T1	N1	M1	Distant	Yes	No/Unknown	Testis	11	Dead
2974066	2004	39	21-40	White	I	T1	N0	M0	Localized	Yes	Yes	Alive	148	Alive
2974071	2004	33	21-40	White	II	T2	N1	M0	Regional	Yes	Yes	Alive	147	Alive
2974234	2004	28	21-40	White	III	T2	N1	M1	Distant	Yes	No/Unknown	Alive	147	Alive
2974240	2004	32	21-40	White	I	T1	N0	M0	Localized	Yes	Yes	Alive	145	Alive
2974273	2004	34	21-40	White	I	T1	N0	M0	Localized	Yes	No/Unknown	Alive	149	Alive
2974770	2004	49	41-60	White	I	T1	N0	M0	Localized	Yes	Yes	Alive	154	Alive
2975402	2004	33	21-40	White	I	T1	N0	M0	Localized	Yes	Yes	Alive	147	Alive
2975630	2004	25	21-40	White	III	T4	N0	M1	Distant	Yes	No/Unknown	Alive	148	Alive
2976091	2004	18	0-20	White	I	T1	N0	M0	Localized	Yes	Yes	Alive	149	Alive
2976446	2004	21	21-40	White	I	T1	N0	M0	Localized	Yes	Yes	Alive	152	Alive
2976448	2004	42	41-60	White	I	T1	N0	M0	Localized	Yes	No/Unknown	Alive	150	Alive
2976457	2004	1	0-20	Others	I	T1	N0	M0	Localized	Yes	No/Unknown	Alive	151	Alive
2976462	2004	37	21-40	White	I	T1	N0	M0	Localized	Yes	Yes	Alive	150	Alive
2977028	2004	29	21-40	White	I	T1	N0	M0	Localized	Yes	No/Unknown	Alive	148	Alive
2977138	2004	48	41-60	Others	III	T2	N0	M1	Distant	Yes	No/Unknown	Testis	36	Dead
2977527	2004	29	21-40	White	II	T1	N3	M0	Regional	Yes	No/Unknown	Alive	132	Alive
2978879	2004	29	21-40	White	I	T1	N0	M0	Localized	Yes	No/Unknown	Alive	144	Alive
2979228	2004	35	21-40	White	II	T3	N1	M0	Regional	Yes	Yes	Alive	128	Alive
2980496	2004	23	21-40	White	I	T1	N0	M0	Localized	Yes	Yes	Alive	144	Alive
2980648	2004	53	41-60	White	I	T1	N0	M0	Localized	Yes	No/Unknown	Alive	149	Alive
2980650	2004	27	21-40	Others	I	T2	N0	M0	Localized	Yes	No/Unknown	Alive	147	Alive
2980819	2004	67	>60	White	I	T1	N0	M0	Localized	Yes	Yes	Alive	154	Alive
2980822	2004	28	21-40	White	I	T1	N0	M0	Localized	Yes	Yes	Alive	154	Alive
2980824	2004	34	21-40	White	III	T1	N3	M1	Distant	Yes	No/Unknown	Alive	152	Alive
2980900	2004	42	41-60	White	I	T2	N0	M0	Localized	Yes	Yes	Alive	126	Alive
2980909	2004	43	41-60	White	II	T1	N1	M0	Regional	Yes	No/Unknown	Alive	144	Alive
2980914	2004	46	41-60	White	III	T2	N0	M1	Distant	Yes	No/Unknown	Testis	32	Dead
2981061	2004	31	21-40	White	I	T1	N0	M0	Localized	Yes	Yes	Alive	144	Alive
2981190	2004	50	41-60	White	I	T1	N0	M0	Localized	Yes	Yes	Alive	147	Alive
2983042	2004	43	41-60	White	II	T1	N2	M0	Regional	Yes	No/Unknown	Alive	146	Alive
2983093	2004	33	21-40	White	II	T3	N1	M0	Regional	Yes	No/Unknown	Alive	147	Alive
2983328	2004	37	21-40	Others	III	T1	N0	M1	Distant	Yes	No/Unknown	Miscellaneous Malignant Cancer	48	Dead
2983889	2004	25	21-40	White	I	T1	N0	M0	Localized	Yes	No/Unknown	Alive	145	Alive
2984476	2004	20	0-20	White	I	T1	N0	M0	Localized	Yes	Yes	Alive	149	Alive
2985615	2004	59	41-60	White	III	T2	N0	M1	Distant	Yes	No/Unknown	Testis	16	Dead
2986533	2004	22	21-40	White	I	T1	N0	M0	Localized	Yes	Yes	Alive	144	Alive
2987338	2004	37	21-40	White	I	T1	N0	M0	Localized	Yes	Yes	Alive	148	Alive
2987811	2004	30	21-40	White	I	T1	N0	M0	Localized	Yes	No/Unknown	Alive	151	Alive
2987815	2004	32	21-40	White	I	T1	N0	M0	Localized	Yes	No/Unknown	Alive	151	Alive
2988005	2004	41	41-60	White	I	T1	N0	M0	Localized	Yes	No/Unknown	Alive	154	Alive
2988636	2004	39	21-40	White	I	T1	N0	M0	Localized	Yes	Yes	Alive	147	Alive
2988642	2004	28	21-40	White	II	T2	N2	M0	Regional	Yes	No/Unknown	Alive	146	Alive
2988646	2004	24	21-40	White	I	T1	N0	M0	Localized	Yes	Yes	Alive	147	Alive
2988720	2004	96	>60	White	I	T1	N0	M0	Localized	Yes	No/Unknown	Diseases of Heart	27	Dead
2989292	2004	51	41-60	Black	I	T1	N0	M0	Localized	Yes	Yes	Alive	155	Alive
2989687	2005	60	41-60	White	III	T1	N2	M1	Distant	Yes	Yes	Testis	10	Dead
2990356	2005	22	21-40	White	II	T1	N1	M0	Regional	Yes	No/Unknown	Alive	142	Alive
2990795	2005	38	21-40	White	I	T1	N0	M0	Localized	Yes	Yes	Alive	143	Alive
2991042	2005	17	0-20	White	III	T1	N3	M1	Distant	Yes	No/Unknown	Alive	142	Alive
2991157	2005	35	21-40	White	I	T1	N0	M0	Localized	Yes	Yes	Alive	138	Alive
2991173	2005	34	21-40	White	I	T2	N0	M0	Localized	Yes	Yes	Alive	142	Alive
2991186	2005	23	21-40	Others	I	T1	N0	M0	Localized	Yes	No/Unknown	Alive	142	Alive
2991469	2005	46	41-60	White	I	T1	N0	M0	Localized	Yes	Yes	Alive	138	Alive
2991476	2005	72	>60	White	III	T3	N1	M1	Distant	Yes	No/Unknown	Testis	0	Dead
3401062	2005	26	21-40	White	I	T2	N0	M0	Localized	Yes	No/Unknown	Alive	140	Alive
3402545	2005	28	21-40	White	III	T3	N0	M1	Distant	Yes	No/Unknown	Alive	142	Alive
3404059	2005	41	41-60	Black	I	T2	N0	M0	Localized	Yes	No/Unknown	Alive	138	Alive
3404065	2005	27	21-40	Others	I	T2	N0	M0	Localized	Yes	No/Unknown	Alive	140	Alive
3404067	2005	39	21-40	White	I	T1	N0	M0	Localized	Yes	No/Unknown	Alive	139	Alive
3404276	2005	36	21-40	White	III	T1	N0	M1	Distant	Yes	Yes	Testis	29	Dead
3404279	2005	56	41-60	White	I	T3	N0	M0	Regional	Yes	Yes	Alive	141	Alive
3404282	2005	35	21-40	White	I	T1	N0	M0	Localized	Yes	Yes	Alive	141	Alive
3404287	2005	27	21-40	White	I	T1	N0	M0	Localized	Yes	Yes	Alive	127	Alive
3404288	2005	40	21-40	White	I	T1	N0	M0	Localized	Yes	No/Unknown	Alive	141	Alive
3404292	2005	59	41-60	White	I	T1	N0	M0	Localized	Yes	No/Unknown	Alive	139	Alive
3404297	2005	27	21-40	White	I	T1	N0	M0	Localized	Yes	No/Unknown	Alive	123	Alive
3404311	2005	26	21-40	White	I	T1	N0	M0	Localized	Yes	Yes	Alive	141	Alive
3404315	2005	40	21-40	White	I	T1	N0	M0	Localized	Yes	No/Unknown	Alive	136	Alive
3404317	2005	24	21-40	White	I	T1	N0	M0	Localized	Yes	No/Unknown	Alive	138	Alive
3405053	2005	28	21-40	Others	I	T1	N0	M0	Localized	Yes	Yes	Alive	136	Alive
3406018	2005	28	21-40	White	I	T2	N0	M0	Localized	Yes	No/Unknown	Alive	45	Alive
3406950	2005	42	41-60	White	I	T2	N0	M0	Localized	Yes	Yes	Alive	137	Alive
3406989	2005	36	21-40	White	I	T1	N0	M0	Localized	Yes	Yes	Alive	140	Alive
3408137	2005	40	21-40	White	I	T1	N0	M0	Localized	Yes	Yes	Alive	135	Alive
3408144	2005	36	21-40	White	I	T2	N0	M0	Localized	Yes	No/Unknown	Alive	136	Alive
3408946	2005	31	21-40	Others	I	T2	N0	M0	Localized	Yes	No/Unknown	Alive	138	Alive
3409298	2005	31	21-40	White	I	T1	N0	M0	Localized	Yes	No/Unknown	Alive	134	Alive
3410188	2005	37	21-40	Others	I	T1	N0	M0	Localized	Yes	No/Unknown	Alive	143	Alive
3410191	2005	36	21-40	White	I	T1	N0	M0	Localized	Yes	Yes	Alive	137	Alive
3410192	2005	38	21-40	Others	III	T2	N1	M1	Distant	Yes	No/Unknown	Alive	139	Alive
3410309	2005	35	21-40	White	I	T1	N0	M0	Localized	Yes	Yes	Alive	142	Alive
3410315	2005	44	41-60	White	I	T1	N0	M0	Localized	Yes	No/Unknown	Alive	139	Alive
3410316	2005	31	21-40	White	I	T1	N0	M0	Localized	Yes	Yes	Alive	140	Alive
3410320	2005	45	41-60	White	I	T1	N0	M0	Localized	Yes	No/Unknown	Alive	141	Alive
3410322	2005	27	21-40	White	I	T1	N0	M0	Localized	Yes	No/Unknown	Alive	141	Alive
3410327	2005	23	21-40	White	I	T2	N0	M0	Localized	Yes	No/Unknown	Alive	138	Alive
3410330	2005	51	41-60	White	I	T1	N0	M0	Localized	Yes	No/Unknown	Alive	140	Alive
3410332	2005	41	41-60	White	I	T1	N0	M0	Localized	Yes	Yes	Alive	137	Alive
3410335	2005	52	41-60	White	I	T1	N0	M0	Localized	Yes	Yes	Alive	136	Alive
3410342	2005	46	41-60	White	I	T1	N0	M0	Localized	Yes	No/Unknown	Alive	136	Alive
3411277	2005	44	41-60	White	I	T2	N0	M0	Localized	Yes	No/Unknown	Alive	133	Alive
3411280	2005	44	41-60	White	I	T1	N0	M0	Localized	Yes	Yes	Alive	135	Alive
3411529	2005	25	21-40	White	I	T1	N0	M0	Localized	Yes	No/Unknown	Alive	136	Alive
3411532	2005	40	21-40	White	I	T1	N0	M0	Localized	Yes	Yes	Alive	135	Alive
3411535	2005	32	21-40	White	I	T1	N0	M0	Localized	Yes	No/Unknown	Alive	136	Alive
3412526	2005	28	21-40	White	I	T1	N0	M0	Localized	Yes	Yes	Alive	138	Alive
3412539	2005	25	21-40	White	III	T1	N1	M0	Regional	Yes	No/Unknown	Alive	142	Alive
3412545	2005	39	21-40	White	II	T1	N1	M0	Regional	Yes	No/Unknown	Alive	139	Alive
3413807	2005	30	21-40	White	I	T1	N0	M0	Localized	Yes	No/Unknown	Alive	135	Alive
3414718	2005	33	21-40	Others	I	T1	N0	M0	Localized	Yes	Yes	Alive	137	Alive
3415207	2005	39	21-40	White	I	T1	N0	M0	Localized	Yes	Yes	Alive	132	Alive
3415287	2005	40	21-40	White	I	T1	N0	M0	Localized	Yes	Yes	Alive	143	Alive
3415395	2005	40	21-40	White	I	T1	N0	M0	Localized	Yes	Yes	Alive	134	Alive
3415667	2005	37	21-40	White	I	T1	N0	M0	Localized	Yes	Yes	Alive	133	Alive
3415777	2005	34	21-40	White	I	T1	N0	M0	Localized	Yes	Yes	Alive	135	Alive
3416503	2005	54	41-60	White	I	T1	N0	M0	Localized	Yes	No/Unknown	Alive	139	Alive
3417008	2005	39	21-40	White	I	T1	N0	M0	Localized	Yes	No/Unknown	Alive	135	Alive
3417061	2005	19	0-20	White	I	T1	N0	M0	Localized	Yes	Yes	Alive	135	Alive
3417150	2005	48	41-60	White	I	T1	N0	M0	Localized	Yes	No/Unknown	Alive	136	Alive
3417241	2005	37	21-40	White	I	T1	N0	M0	Localized	Yes	No/Unknown	Alive	133	Alive
3417528	2005	37	21-40	White	I	T1	N0	M0	Localized	Yes	Yes	Alive	133	Alive
3417669	2005	29	21-40	White	I	T1	N0	M0	Localized	Yes	No/Unknown	Alive	137	Alive
3417970	2005	55	41-60	White	I	T1	N0	M0	Localized	Yes	No/Unknown	State DC not available or state DC available but no COD	97	Dead
3418145	2005	38	21-40	White	I	T1	N0	M0	Localized	Yes	Yes	Alive	133	Alive
3419207	2005	48	41-60	White	I	T2	N0	M0	Localized	Yes	Yes	Alive	133	Alive
3419950	2005	40	21-40	White	III	T2	N1	M1	Distant	Yes	No/Unknown	Alive	133	Alive
3421105	2005	40	21-40	White	I	T2	N0	M0	Localized	Yes	No/Unknown	Alive	138	Alive
3422409	2005	31	21-40	White	I	T1	N0	M0	Localized	Yes	No/Unknown	Alive	30	Alive
3422662	2005	33	21-40	White	III	T3	N3	M1	Regional	Yes	No/Unknown	Alive	132	Alive
3422724	2005	41	41-60	White	I	T1	N0	M0	Localized	Yes	Yes	Alive	132	Alive
3423040	2005	38	21-40	White	I	T1	N0	M0	Localized	Yes	No/Unknown	Alive	134	Alive
3423115	2005	31	21-40	White	II	T2	N2	M0	Regional	Yes	No/Unknown	Alive	134	Alive
3423544	2005	33	21-40	White	I	T1	N0	M0	Localized	Yes	Yes	Alive	133	Alive
3423654	2006	25	21-40	White	I	T2	N0	M0	Localized	Yes	No/Unknown	Alive	118	Alive
3423972	2005	29	21-40	White	II	T1	N2	M0	Regional	Yes	No/Unknown	Alive	135	Alive
3424221	2006	26	21-40	White	I	T1	N0	M0	Localized	Yes	Yes	Alive	131	Alive
3424991	2004	21	21-40	Others	I	T1	N0	M0	Localized	Yes	No/Unknown	Alive	150	Alive
3425993	2004	22	21-40	White	I	T1	N0	M0	Localized	Yes	No/Unknown	Alive	151	Alive
3426256	2005	44	41-60	White	I	T2	N0	M0	Localized	Yes	Yes	Alive	132	Alive
3426540	2005	39	21-40	White	I	T1	N0	M0	Localized	Yes	Yes	Alive	133	Alive
3427001	2005	24	21-40	White	I	T1	N0	M0	Localized	Yes	No/Unknown	Alive	132	Alive
3427981	2005	47	41-60	White	I	T1	N0	M0	Localized	Yes	Yes	Other Cause of Death	84	Dead
3428140	2005	43	41-60	White	I	T1	N0	M0	Localized	Yes	Yes	Alive	132	Alive
3428743	2006	30	21-40	Others	I	T1	N0	M0	Localized	Yes	No/Unknown	Alive	130	Alive
3428781	2006	47	41-60	White	I	T1	N0	M0	Localized	Yes	Yes	Alive	128	Alive
3429635	2006	26	21-40	White	I	T1	N0	M0	Localized	Yes	Yes	Alive	129	Alive
3430169	2006	43	41-60	White	I	T1	N0	M0	Localized	Yes	Yes	Alive	130	Alive
3431445	2006	33	21-40	White	III	T1	N0	M1	Distant	Yes	No/Unknown	Alive	84	Alive
3431553	2006	42	41-60	White	I	T1	N0	M0	Localized	Yes	Yes	Alive	31	Alive
3432753	2004	36	21-40	White	I	T1	N0	M0	Localized	Yes	No/Unknown	Alive	147	Alive
3433828	2006	45	41-60	Black	I	T1	N0	M0	Localized	Yes	Yes	Alive	127	Alive
3433901	2006	50	41-60	White	II	T1	N1	M0	Regional	Yes	Yes	Alive	128	Alive
3434885	2006	39	21-40	Others	III	T1	N1	M1	Distant	Yes	Yes	Testis	12	Dead
3435154	2006	44	41-60	White	I	T1	N0	M0	Localized	Yes	No/Unknown	Alive	128	Alive
3435261	2006	39	21-40	Others	I	T2	N0	M0	Localized	Yes	Yes	Alive	130	Alive
3435358	2006	33	21-40	White	I	T1	N0	M0	Localized	Yes	No/Unknown	Alive	45	Alive
3435837	2006	25	21-40	White	I	T1	N0	M0	Localized	Yes	Yes	Alive	80	Alive
3436080	2006	30	21-40	White	II	T1	N2	M0	Regional	Yes	No/Unknown	Alive	129	Alive
3436390	2006	34	21-40	White	II	T1	N3	M0	Regional	Yes	No/Unknown	Alive	129	Alive
3436607	2005	34	21-40	White	I	T2	N0	M0	Regional	Yes	Yes	Alive	68	Alive
3436689	2006	26	21-40	White	I	T1	N0	M0	Localized	Yes	Yes	Alive	127	Alive
3436974	2004	25	21-40	White	I	T2	N0	M0	Localized	Yes	No/Unknown	Accidents and Adverse Effects	15	Dead
3437403	2006	15	0-20	White	I	T1	N0	M0	Localized	Yes	No/Unknown	Alive	126	Alive
3437456	2006	45	41-60	White	I	T1	N0	M0	Localized	Yes	Yes	Alive	124	Alive
3437593	2006	24	21-40	White	I	T2	N0	M0	Localized	Yes	Yes	Alive	129	Alive
3437673	2006	24	21-40	White	I	T1	N0	M0	Localized	Yes	Yes	Alive	128	Alive
3438212	2006	41	41-60	Others	I	T1	N0	M0	Localized	Yes	Yes	Alive	124	Alive
3438372	2006	45	41-60	White	I	T1	N0	M0	Localized	Yes	Yes	Alive	126	Alive
3438581	2005	37	21-40	White	I	T1	N0	M0	Localized	Yes	No/Unknown	Alive	38	Alive
3438621	2006	38	21-40	White	I	T1	N0	M0	Localized	Yes	No/Unknown	Alive	128	Alive
3439139	2006	50	41-60	White	I	T2	N0	M0	Localized	Yes	No/Unknown	Alive	125	Alive
3440046	2005	45	41-60	White	I	T1	N0	M0	Localized	Yes	No/Unknown	Alive	141	Alive
3440175	2006	53	41-60	White	I	T1	N0	M0	Localized	Yes	Yes	Alive	130	Alive
3440447	2006	50	41-60	White	I	T1	N0	M0	Localized	Yes	No/Unknown	Alive	124	Alive
3440948	2006	53	41-60	White	II	T2	N2	M0	Regional	Yes	No/Unknown	Alive	124	Alive
3441473	2006	41	41-60	White	I	T2	N0	M0	Localized	Yes	Yes	Alive	127	Alive
3441930	2006	34	21-40	White	I	T1	N0	M0	Localized	Yes	No/Unknown	Alive	126	Alive
3441991	2006	40	21-40	White	I	T1	N0	M0	Localized	Yes	Yes	Alive	127	Alive
3442166	2005	26	21-40	White	I	T2	N0	M0	Localized	Yes	No/Unknown	Alive	138	Alive
3442746	2006	35	21-40	White	I	T1	N0	M0	Localized	Yes	No/Unknown	Alive	49	Alive
3443268	2006	25	21-40	White	II	T1	N1	M0	Regional	Yes	No/Unknown	Alive	127	Alive
3443523	2006	34	21-40	White	I	T1	N0	M0	Localized	Yes	Yes	Alive	126	Alive
3444424	2006	25	21-40	White	I	T1	N0	M0	Localized	Yes	No/Unknown	Alive	123	Alive
3445237	2006	15	0-20	White	I	T1	N0	M0	Localized	Yes	No/Unknown	Alive	130	Alive
3445509	2005	33	21-40	White	I	T1	N0	M0	Localized	Yes	Yes	Alive	133	Alive
3446693	2006	22	21-40	White	I	T1	N0	M0	Localized	Yes	No/Unknown	Alive	78	Alive
3446774	2006	32	21-40	White	I	T2	N0	M0	Localized	Yes	No/Unknown	Alive	126	Alive
3447036	2006	26	21-40	White	I	T1	N0	M0	Localized	Yes	Yes	Alive	125	Alive
3447058	2006	30	21-40	White	I	T1	N0	M0	Localized	Yes	No/Unknown	Alive	123	Alive
3447807	2006	50	41-60	White	I	T1	N0	M0	Localized	Yes	Yes	Alive	123	Alive
3448283	2006	17	0-20	Others	I	T2	N0	M0	Localized	Yes	No/Unknown	Alive	124	Alive
3448310	2006	30	21-40	Others	I	T1	N0	M0	Localized	Yes	No/Unknown	Alive	124	Alive
3448314	2006	27	21-40	White	I	T1	N0	M0	Localized	Yes	Yes	Alive	123	Alive
3448853	2006	33	21-40	White	I	T1	N0	M0	Localized	Yes	No/Unknown	Alive	123	Alive
3449307	2006	36	21-40	White	I	T1	N0	M0	Localized	Yes	Yes	Alive	4	Alive
3449350	2006	35	21-40	Others	I	T1	N0	M0	Localized	Yes	No/Unknown	Alive	128	Alive
3449560	2006	31	21-40	White	I	T1	N0	M0	Localized	Yes	No/Unknown	Alive	124	Alive
3450064	2006	25	21-40	White	I	T1	N0	M0	Localized	Yes	No/Unknown	Alive	123	Alive
3450395	2005	28	21-40	White	II	T2	N2	M0	Regional	Yes	No/Unknown	Alive	133	Alive
3450827	2006	34	21-40	White	I	T1	N0	M0	Localized	Yes	No/Unknown	Alive	131	Alive
3450991	2005	21	21-40	White	II	T1	N1	M0	Regional	Yes	No/Unknown	Alive	132	Alive
3452171	2006	36	21-40	White	I	T1	N0	M0	Localized	Yes	No/Unknown	Alive	106	Alive
3452189	2006	30	21-40	White	I	T2	N0	M0	Localized	Yes	Yes	Alive	19	Alive
3452259	2006	24	21-40	White	I	T1	N0	M0	Localized	Yes	No/Unknown	Alive	126	Alive
3452323	2006	36	21-40	White	I	T1	N0	M0	Localized	Yes	Yes	State DC not available or state DC available but no COD	37	Dead
3452521	2006	21	21-40	White	I	T1	N0	M0	Localized	Yes	No/Unknown	Alive	125	Alive
3452667	2005	26	21-40	White	I	T2	N0	M0	Localized	Yes	No/Unknown	Alive	141	Alive
3453413	2006	47	41-60	White	I	T1	N0	M0	Localized	Yes	Yes	Alive	129	Alive
3453447	2006	38	21-40	White	I	T1	N0	M0	Localized	Yes	Yes	Alive	123	Alive
3453494	2006	42	41-60	White	I	T1	N0	M0	Localized	Yes	Yes	Alive	122	Alive
3453546	2006	29	21-40	White	II	T2	N2	M0	Regional	Yes	No/Unknown	Alive	125	Alive
3454952	2006	26	21-40	White	I	T1	N0	M0	Localized	Yes	No/Unknown	Alive	122	Alive
3455184	2006	51	41-60	White	I	T1	N0	M0	Localized	Yes	No/Unknown	Alive	104	Alive
3455247	2006	27	21-40	White	I	T1	N0	M0	Localized	Yes	Yes	Alive	127	Alive
3455786	2006	33	21-40	Others	I	T1	N0	M0	Localized	Yes	No/Unknown	Alive	123	Alive
3455955	2006	37	21-40	White	I	T1	N0	M0	Localized	Yes	Yes	Alive	123	Alive
3456045	2006	30	21-40	White	I	T2	N0	M0	Localized	Yes	No/Unknown	Alive	122	Alive
3456123	2006	48	41-60	Black	I	T1	N0	M0	Localized	Yes	Yes	Alive	122	Alive
3456763	2006	36	21-40	White	II	T2	N1	M0	Distant	Yes	Yes	Alive	121	Alive
3456833	2006	21	21-40	White	I	T1	N0	M0	Localized	Yes	No/Unknown	Alive	120	Alive
3456834	2006	20	0-20	White	I	T1	N0	M0	Localized	Yes	No/Unknown	Alive	121	Alive
3456910	2006	39	21-40	White	I	T1	N0	M0	Localized	Yes	Yes	Alive	118	Alive
3457894	2006	28	21-40	White	I	T2	N0	M0	Localized	Yes	Yes	Alive	120	Alive
3458039	2006	14	0-20	White	III	T3	N1	M1	Distant	Yes	No/Unknown	Alive	98	Alive
3458127	2006	48	41-60	White	I	T1	N0	M0	Localized	Yes	No/Unknown	Alive	61	Alive
3460398	2006	32	21-40	Others	I	T1	N0	M0	Localized	Yes	Yes	Alive	123	Alive
3460990	2006	25	21-40	White	I	T1	N0	M0	Localized	Yes	No/Unknown	Alive	122	Alive
3461443	2006	52	41-60	White	I	T1	N0	M0	Localized	Yes	No/Unknown	Alive	122	Alive
3461468	2006	47	41-60	White	III	T2	N1	M0	Regional	Yes	No/Unknown	Alive	120	Alive
3461851	2006	25	21-40	White	I	T1	N0	M0	Localized	Yes	Yes	Alive	121	Alive
3462256	2006	33	21-40	White	II	T1	N2	M0	Regional	Yes	No/Unknown	Alive	121	Alive
3462299	2006	28	21-40	White	I	T2	N0	M0	Localized	Yes	No/Unknown	Alive	123	Alive
3462420	2005	40	21-40	Others	I	T1	N0	M0	Localized	Yes	Yes	Alive	83	Alive
3462865	2006	52	41-60	White	I	T2	N0	M0	Localized	Yes	Yes	Alive	121	Alive
3462866	2006	40	21-40	White	I	T1	N0	M0	Localized	Yes	No/Unknown	Alive	121	Alive
3463203	2006	33	21-40	White	I	T1	N0	M0	Localized	Yes	Yes	Alive	120	Alive
3465904	2005	28	21-40	White	III	T2	N2	M1	Distant	Yes	No/Unknown	Alive	132	Alive
3466959	2007	37	21-40	Others	I	T1	N0	M0	Localized	Yes	Yes	Alive	119	Alive
3467195	2007	41	41-60	White	III	T1	N2	M0	Regional	Yes	Yes	Alive	116	Alive
3467470	2007	24	21-40	White	I	T1	N0	M0	Localized	Yes	No/Unknown	Alive	115	Alive
3467593	2007	27	21-40	White	I	T1	N0	M0	Localized	Yes	No/Unknown	Alive	118	Alive
3467898	2007	29	21-40	White	I	T1	N0	M0	Localized	Yes	No/Unknown	Alive	119	Alive
3468101	2006	33	21-40	White	I	T1	N0	M0	Localized	Yes	No/Unknown	Alive	125	Alive
3468247	2007	40	21-40	Others	II	T1	N3	M0	Regional	Yes	No/Unknown	Alive	116	Alive
3468769	2007	44	41-60	Black	I	T1	N0	M0	Localized	Yes	Yes	Alive	118	Alive
3469885	2007	20	0-20	White	II	T1	N2	M0	Regional	Yes	No/Unknown	Alive	115	Alive
3470669	2006	21	21-40	White	I	T3	N0	M0	Regional	Yes	No/Unknown	Testis	35	Dead
3470832	2007	23	21-40	White	II	T1	N1	M0	Regional	Yes	No/Unknown	Alive	118	Alive
3470892	2007	47	41-60	White	II	T3	N2	M0	Regional	Yes	No/Unknown	Alive	112	Alive
3471390	2007	43	41-60	White	I	T1	N0	M0	Localized	Yes	Yes	Alive	116	Alive
3471391	2007	32	21-40	White	I	T1	N0	M0	Localized	Yes	Yes	Alive	116	Alive
3471405	2007	34	21-40	Others	I	T1	N0	M0	Regional	Yes	No/Unknown	Alive	64	Alive
3471414	2007	62	>60	White	I	T1	N0	M0	Localized	Yes	Yes	Alive	116	Alive
3471987	2007	27	21-40	White	I	T1	N0	M0	Localized	Yes	Yes	Alive	111	Alive
3472563	2007	30	21-40	Others	I	T1	N0	M0	Localized	Yes	No/Unknown	Alive	118	Alive
3472565	2007	53	41-60	White	I	T1	N0	M0	Localized	Yes	No/Unknown	Testis	22	Dead
3472666	2007	45	41-60	White	I	T1	N0	M0	Localized	Yes	No/Unknown	Alive	117	Alive
3473333	2007	26	21-40	White	I	T1	N0	M0	Localized	Yes	Yes	Alive	119	Alive
3473342	2006	42	41-60	White	I	T1	N0	M0	Localized	Yes	No/Unknown	Alive	123	Alive
3474308	2007	31	21-40	White	III	T2	N0	M1	Distant	Yes	No/Unknown	Alive	114	Alive
3474716	2007	26	21-40	White	I	T1	N0	M0	Localized	Yes	No/Unknown	Alive	114	Alive
3474968	2007	33	21-40	Others	I	T1	N0	M0	Localized	Yes	No/Unknown	Alive	118	Alive
3475184	2007	41	41-60	White	II	T1	N1	M0	Regional	Yes	No/Unknown	Alive	116	Alive
3475303	2007	22	21-40	White	III	T1	N3	M0	Regional	Yes	No/Unknown	Alive	116	Alive
3475333	2007	35	21-40	White	I	T1	N0	M0	Localized	Yes	No/Unknown	Alive	118	Alive
3475508	2007	28	21-40	White	III	T1	N3	M1	Distant	Yes	No/Unknown	Alive	118	Alive
3476473	2007	47	41-60	White	I	T1	N0	M0	Localized	Yes	Yes	Alive	116	Alive
3477925	2007	39	21-40	White	I	T1	N0	M0	Localized	Yes	Yes	Alive	113	Alive
3478564	2007	33	21-40	White	II	T2	N1	M0	Regional	Yes	No/Unknown	Other Cause of Death	18	Dead
3479066	2007	28	21-40	White	II	T2	N2	M0	Regional	Yes	Yes	Alive	113	Alive
3479155	2006	37	21-40	White	I	T2	N0	M0	Localized	Yes	No/Unknown	Alive	120	Alive
3479668	2006	31	21-40	White	I	T1	N0	M0	Localized	Yes	No/Unknown	Alive	120	Alive
3479882	2007	34	21-40	White	I	T1	N0	M0	Localized	Yes	Yes	Alive	115	Alive
3480914	2007	66	>60	White	I	T1	N0	M0	Localized	Yes	Yes	Alive	111	Alive
3480982	2007	38	21-40	White	I	T1	N0	M0	Localized	Yes	No/Unknown	Alive	114	Alive
3481058	2007	38	21-40	Others	I	T1	N0	M0	Regional	Yes	No/Unknown	Alive	116	Alive
3481432	2007	15	0-20	White	I	T1	N0	M0	Localized	Yes	No/Unknown	Alive	113	Alive
3481623	2007	32	21-40	White	II	T1	N1	M0	Regional	Yes	No/Unknown	Alive	29	Alive
3482501	2007	25	21-40	Others	III	T2	N0	M1	Distant	Yes	No/Unknown	Alive	117	Alive
3482537	2007	33	21-40	White	I	T1	N0	M0	Localized	Yes	Yes	Alive	111	Alive
3482644	2007	41	41-60	White	I	T2	N0	M0	Localized	Yes	Yes	Alive	116	Alive
3482711	2007	54	41-60	White	I	T1	N0	M0	Localized	Yes	Yes	Alive	112	Alive
3484906	2007	31	21-40	White	I	T1	N0	M0	Localized	Yes	Yes	Alive	111	Alive
3485419	2007	51	41-60	Others	I	T2	N0	M0	Localized	Yes	Yes	Alive	110	Alive
3486174	2007	62	>60	White	I	T1	N0	M0	Localized	Yes	Yes	Alive	114	Alive
3486326	2007	35	21-40	White	I	T1	N0	M0	Localized	Yes	No/Unknown	Alive	109	Alive
3486483	2007	33	21-40	Others	II	T2	N1	M0	Regional	Yes	No/Unknown	Alive	115	Alive
3487233	2007	43	41-60	White	III	T3	N1	M1	Distant	Yes	No/Unknown	Alive	111	Alive
3487256	2007	61	>60	White	I	T1	N0	M0	Localized	Yes	Yes	Alive	114	Alive
3487849	2007	45	41-60	White	I	T1	N0	M0	Localized	Yes	No/Unknown	Alive	93	Alive
3488421	2007	28	21-40	White	I	T1	N0	M0	Localized	Yes	No/Unknown	Alive	117	Alive
3488586	2007	38	21-40	Black	I	T1	N0	M0	Localized	Yes	Yes	Alive	110	Alive
3489152	2007	27	21-40	White	I	T1	N0	M0	Regional	Yes	Yes	Alive	110	Alive
3489206	2007	51	41-60	White	I	T1	N0	M0	Localized	Yes	No/Unknown	Alive	110	Alive
3489875	2007	22	21-40	White	I	T1	N0	M0	Localized	Yes	No/Unknown	Alive	92	Alive
3489908	2007	30	21-40	Others	II	T1	N1	M0	Regional	Yes	No/Unknown	Alive	115	Alive
3490176	2007	21	21-40	White	I	T1	N0	M0	Localized	Yes	No/Unknown	Alive	112	Alive
3490428	2007	26	21-40	White	I	T1	N0	M0	Localized	Yes	Yes	Alive	118	Alive
3490429	2007	39	21-40	White	III	T1	N1	M1	Distant	Yes	No/Unknown	Alive	111	Alive
3490585	2007	24	21-40	White	I	T1	N0	M0	Localized	Yes	No/Unknown	Alive	112	Alive
3490986	2007	39	21-40	White	I	T2	N0	M0	Localized	Yes	Yes	Alive	112	Alive
3491204	2007	47	41-60	White	I	T1	N0	M0	Localized	Yes	No/Unknown	Alive	116	Alive
3491460	2007	25	21-40	White	II	T3	N1	M0	Regional	Yes	Yes	Alive	115	Alive
3491486	2007	19	0-20	White	II	T2	N1	M0	Regional	Yes	No/Unknown	Alive	113	Alive
3491930	2007	27	21-40	White	I	T1	N0	M0	Localized	Yes	Yes	Alive	114	Alive
3492289	2007	29	21-40	White	I	T2	N0	M0	Localized	Yes	No/Unknown	Alive	116	Alive
3493093	2007	53	41-60	White	II	T1	N2	M0	Regional	Yes	Yes	Testis	36	Dead
3493515	2007	30	21-40	White	I	T1	N0	M0	Localized	Yes	No/Unknown	Alive	110	Alive
3494180	2007	25	21-40	White	I	T2	N0	M0	Localized	Yes	No/Unknown	Alive	111	Alive
3494556	2007	32	21-40	Others	I	T1	N0	M0	Localized	Yes	No/Unknown	Alive	119	Alive
3494640	2007	41	41-60	White	I	T1	N0	M0	Localized	Yes	No/Unknown	Alive	112	Alive
3495274	2007	44	41-60	Black	I	T1	N0	M0	Localized	Yes	Yes	Alive	109	Alive
3495292	2007	31	21-40	Others	I	T1	N0	M0	Localized	Yes	No/Unknown	Alive	114	Alive
3496280	2007	39	21-40	White	II	T2	N1	M0	Regional	Yes	No/Unknown	Alive	119	Alive
3496646	2007	31	21-40	Others	I	T1	N0	M0	Localized	Yes	No/Unknown	Alive	110	Alive
3496653	2007	25	21-40	White	II	T1	N1	M0	Regional	Yes	No/Unknown	Alive	111	Alive
3497343	2008	32	21-40	White	II	T2	N3	M0	Regional	Yes	No/Unknown	Alive	107	Alive
3497541	2007	29	21-40	White	II	T1	N1	M0	Regional	Yes	No/Unknown	Alive	110	Alive
3497776	2008	4	0-20	White	I	T1	N0	M0	Localized	Yes	No/Unknown	Alive	61	Alive
3497784	2008	22	21-40	White	III	T2	N0	M1	Distant	Yes	No/Unknown	Accidents and Adverse Effects	41	Dead
3498499	2007	32	21-40	White	I	T1	N0	M0	Localized	Yes	No/Unknown	Alive	117	Alive
3498815	2008	53	41-60	Others	I	T2	N0	M0	Localized	Yes	Yes	Alive	107	Alive
3498822	2008	57	41-60	White	II	T2	N3	M0	Regional	Yes	No/Unknown	Alive	107	Alive
3499523	2007	34	21-40	White	I	T1	N0	M0	Localized	Yes	No/Unknown	Alive	110	Alive
3500146	2007	22	21-40	White	I	T1	N0	M0	Localized	Yes	No/Unknown	Alive	113	Alive
3500154	2007	33	21-40	White	I	T1	N0	M0	Localized	Yes	No/Unknown	Alive	110	Alive
3500564	2007	20	0-20	White	III	T1	N2	M0	Regional	Yes	No/Unknown	Alive	115	Alive
3500632	2008	33	21-40	White	I	T1	N0	M0	Localized	Yes	Yes	Alive	107	Alive
3501564	2008	24	21-40	White	II	T1	N2	M0	Regional	Yes	No/Unknown	Alive	106	Alive
3501785	2008	37	21-40	White	I	T1	N0	M0	Localized	Yes	Yes	Alive	107	Alive
3502415	2007	24	21-40	White	I	T1	N0	M0	Localized	Yes	No/Unknown	Alive	108	Alive
3502467	2008	29	21-40	White	I	T1	N0	M0	Localized	Yes	Yes	Alive	106	Alive
3503190	2007	31	21-40	White	I	T1	N0	M0	Localized	Yes	No/Unknown	Alive	118	Alive
3503348	2008	26	21-40	Others	I	T2	N0	M0	Localized	Yes	Yes	Alive	107	Alive
3504255	2008	28	21-40	White	II	T2	N1	M0	Regional	Yes	No/Unknown	Alive	104	Alive
3504350	2008	27	21-40	White	III	T2	N3	M0	Regional	Yes	No/Unknown	Alive	107	Alive
3504361	2008	20	0-20	White	III	T3	N2	M1	Distant	Yes	No/Unknown	Alive	107	Alive
3504959	2008	26	21-40	White	II	T2	N2	M0	Regional	Yes	No/Unknown	Alive	105	Alive
3506326	2008	27	21-40	Others	I	T1	N0	M0	Localized	Yes	No/Unknown	Alive	105	Alive
3507450	2008	35	21-40	White	I	T1	N0	M0	Localized	Yes	No/Unknown	Alive	107	Alive
3507594	2008	25	21-40	White	III	T2	N1	M0	Regional	Yes	No/Unknown	Alive	105	Alive
3508033	2008	33	21-40	White	I	T2	N0	M0	Regional	Yes	Yes	Alive	39	Alive
3509557	2008	28	21-40	White	I	T1	N0	M0	Localized	Yes	No/Unknown	Alive	15	Alive
3509809	2008	46	41-60	White	I	T2	N0	M0	Localized	Yes	Yes	Alive	106	Alive
3509824	2008	38	21-40	White	I	T1	N0	M0	Regional	Yes	Yes	Alive	47	Alive
3510070	2008	58	41-60	White	III	T1	N0	M1	Distant	Yes	No/Unknown	Alive	104	Alive
3510910	2008	33	21-40	White	I	T1	N0	M0	Localized	Yes	No/Unknown	Alive	106	Alive
3512315	2008	34	21-40	White	II	T1	N1	M0	Regional	Yes	No/Unknown	Alive	106	Alive
3512318	2008	44	41-60	White	I	T1	N0	M0	Localized	Yes	No/Unknown	Alive	83	Alive
3512365	2008	35	21-40	White	I	T1	N0	M0	Localized	Yes	No/Unknown	Alive	106	Alive
3512561	2008	32	21-40	Black	I	T1	N0	M0	Localized	Yes	No/Unknown	Alive	101	Alive
3512617	2008	43	41-60	White	I	T1	N0	M0	Localized	Yes	No/Unknown	Alive	105	Alive
3512720	2008	38	21-40	White	I	T1	N0	M0	Localized	Yes	Yes	Alive	103	Alive
3512752	2008	63	>60	White	I	T3	N0	M0	Regional	Yes	No/Unknown	Alive	66	Alive
3514049	2008	29	21-40	White	I	T1	N0	M0	Localized	Yes	No/Unknown	Alive	103	Alive
3514217	2008	68	>60	White	I	T2	N0	M0	Localized	Yes	Yes	Alive	103	Alive
3514830	2007	24	21-40	Others	II	T1	N2	M0	Regional	Yes	No/Unknown	Alive	118	Alive
3514908	2008	20	0-20	White	I	T2	N0	M0	Localized	Yes	No/Unknown	Alive	45	Alive
3515193	2008	31	21-40	Others	I	T1	N0	M0	Localized	Yes	Yes	Alive	105	Alive
3515348	2008	36	21-40	White	III	T2	N2	M0	Regional	Yes	No/Unknown	Alive	21	Alive
3515351	2008	27	21-40	White	I	T1	N0	M0	Localized	Yes	No/Unknown	Alive	102	Alive
3515585	2008	45	41-60	White	I	T1	N0	M0	Localized	Yes	No/Unknown	Alive	102	Alive
3516406	2008	32	21-40	White	I	T1	N0	M0	Localized	Yes	No/Unknown	Alive	102	Alive
3516995	2008	28	21-40	White	I	T2	N0	M0	Localized	Yes	No/Unknown	Alive	104	Alive
3517054	2008	51	41-60	White	I	T1	N0	M0	Localized	Yes	No/Unknown	Alive	102	Alive
3517091	2008	35	21-40	White	I	T2	N0	M0	Localized	Yes	No/Unknown	Alive	1	Alive
3517755	2008	20	0-20	Others	I	T3	N0	M0	Regional	Yes	No/Unknown	Alive	102	Alive
3518402	2008	30	21-40	White	I	T1	N0	M0	Localized	Yes	No/Unknown	Alive	100	Alive
3518585	2008	40	21-40	White	I	T1	N0	M0	Localized	Yes	No/Unknown	Alive	100	Alive
3518853	2008	30	21-40	White	I	T1	N0	M0	Localized	Yes	No/Unknown	Alive	102	Alive
3519059	2008	32	21-40	White	I	T2	N0	M0	Localized	Yes	No/Unknown	Alive	100	Alive
3519392	2008	48	41-60	White	II	T1	N1	M0	Regional	Yes	Yes	Alive	104	Alive
3520083	2008	43	41-60	White	I	T2	N0	M0	Localized	Yes	No/Unknown	Alive	102	Alive
3520985	2008	36	21-40	White	I	T2	N0	M0	Localized	Yes	No/Unknown	Alive	87	Alive
3523031	2008	34	21-40	White	I	T1	N0	M0	Localized	Yes	No/Unknown	Alive	98	Alive
3523224	2007	26	21-40	White	I	T1	N0	M0	Localized	Yes	No/Unknown	Testis	51	Dead
3523459	2008	43	41-60	Black	I	T3	N0	M0	Regional	Yes	Yes	Alive	101	Alive
3524236	2008	26	21-40	White	I	T1	N0	M0	Localized	Yes	Yes	Alive	99	Alive
3525325	2008	33	21-40	White	I	T1	N0	M0	Localized	Yes	No/Unknown	Alive	99	Alive
3525409	2008	15	0-20	White	I	T1	N0	M0	Localized	Yes	No/Unknown	Alive	33	Alive
3525545	2008	30	21-40	White	I	T1	N0	M0	Localized	Yes	No/Unknown	Alive	98	Alive
3526125	2008	42	41-60	White	I	T2	N0	M0	Localized	Yes	No/Unknown	Alive	98	Alive
3526249	2008	22	21-40	Black	I	T2	N0	M0	Localized	Yes	No/Unknown	Alive	97	Alive
3526519	2008	39	21-40	White	II	T1	N1	M0	Regional	Yes	No/Unknown	Alive	102	Alive
3527091	2008	28	21-40	White	I	T2	N0	M0	Localized	Yes	Yes	Alive	98	Alive
3527183	2008	33	21-40	White	I	T2	N0	M0	Localized	Yes	Yes	Alive	98	Alive
3527980	2008	22	21-40	Others	I	T1	N0	M0	Localized	Yes	No/Unknown	Alive	99	Alive
3527983	2008	56	41-60	White	I	T1	N0	M0	Localized	Yes	No/Unknown	Alive	99	Alive
3528103	2008	71	>60	White	II	T3	N1	M0	Regional	Yes	Yes	Other Cause of Death	37	Dead
3528299	2008	21	21-40	White	I	T2	N0	M0	Localized	Yes	No/Unknown	Alive	50	Alive
3528358	2008	43	41-60	White	I	T1	N0	M0	Localized	Yes	No/Unknown	Alive	97	Alive
3528463	2008	46	41-60	White	I	T1	N0	M0	Localized	Yes	No/Unknown	Alive	100	Alive
3528511	2008	37	21-40	White	II	T2	N1	M0	Regional	Yes	No/Unknown	Alive	102	Alive
3530797	2008	32	21-40	White	I	T1	N0	M0	Localized	Yes	No/Unknown	Alive	96	Alive
3532609	2008	23	21-40	White	I	T1	N0	M0	Localized	Yes	No/Unknown	Alive	101	Alive
3532657	2008	47	41-60	White	III	T2	N0	M1	Distant	Yes	No/Unknown	Alive	96	Alive
3533213	2008	16	0-20	White	II	T1	N1	M0	Regional	Yes	No/Unknown	Alive	98	Alive
3534224	2008	43	41-60	White	I	T1	N0	M0	Localized	Yes	No/Unknown	Alive	96	Alive
3534227	2008	53	41-60	White	I	T2	N0	M0	Localized	Yes	Yes	Alive	97	Alive
3534235	2008	34	21-40	White	I	T1	N0	M0	Localized	Yes	No/Unknown	Alive	98	Alive
3534462	2008	46	41-60	White	I	T2	N0	M0	Localized	Yes	No/Unknown	Alive	96	Alive
3536048	2009	33	21-40	White	I	T1	N0	M0	Localized	Yes	No/Unknown	Alive	95	Alive
3536339	2008	33	21-40	White	I	T1	N0	M0	Localized	Yes	No/Unknown	Alive	96	Alive
3536816	2008	32	21-40	White	I	T1	N0	M0	Localized	Yes	Yes	Alive	97	Alive
3536831	2008	11	0-20	White	II	T2	N1	M0	Regional	Yes	No/Unknown	Alive	99	Alive
3537122	2008	51	41-60	White	II	T1	N1	M0	Regional	Yes	Yes	Alive	97	Alive
3537204	2008	32	21-40	White	I	T1	N0	M0	Localized	Yes	No/Unknown	Alive	100	Alive
3537353	2007	43	41-60	White	I	T1	N0	M0	Localized	Yes	No/Unknown	Alive	117	Alive
3537773	2008	23	21-40	White	I	T1	N0	M0	Localized	Yes	No/Unknown	Alive	66	Alive
3538272	2008	34	21-40	White	I	T1	N0	M0	Localized	Yes	No/Unknown	Alive	97	Alive
3538553	2008	25	21-40	White	I	T1	N0	M0	Localized	Yes	No/Unknown	Alive	7	Alive
3538771	2008	24	21-40	White	I	T2	N0	M0	Localized	Yes	No/Unknown	Alive	96	Alive
3539100	2009	20	0-20	Others	I	T1	N0	M0	Localized	Yes	No/Unknown	Alive	93	Alive
3540545	2008	26	21-40	White	I	T2	N0	M0	Localized	Yes	No/Unknown	Alive	96	Alive
3540923	2008	16	0-20	White	I	T1	N0	M0	Localized	Yes	Yes	Alive	99	Alive
3540971	2008	27	21-40	Black	I	T2	N0	M0	Localized	Yes	No/Unknown	Testis	0	Dead
3540986	2008	45	41-60	White	I	T1	N0	M0	Localized	Yes	No/Unknown	Alive	98	Alive
3541827	2009	51	41-60	White	I	T1	N0	M0	Localized	Yes	No/Unknown	Alive	92	Alive
3541978	2008	30	21-40	White	I	T1	N0	M0	Localized	Yes	No/Unknown	Alive	96	Alive
3542064	2009	42	41-60	White	I	T2	N0	M0	Localized	Yes	Yes	Alive	94	Alive
3542181	2009	18	0-20	White	I	T1	N0	M0	Localized	Yes	No/Unknown	Alive	95	Alive
3542266	2009	29	21-40	Others	III	T2	N0	M1	Distant	Yes	No/Unknown	Alive	94	Alive
3542351	2009	47	41-60	White	III	T1	N3	M1	Distant	Yes	No/Unknown	Alive	95	Alive
3542403	2009	35	21-40	White	I	T1	N0	M0	Localized	Yes	No/Unknown	Alive	92	Alive
3542512	2009	51	41-60	White	I	T1	N0	M0	Localized	Yes	Yes	Alive	94	Alive
3543254	2009	45	41-60	White	I	T1	N0	M0	Localized	Yes	Yes	Alive	94	Alive
3543922	2008	43	41-60	White	II	T2	N1	M0	Regional	Yes	No/Unknown	Alive	100	Alive
3544563	2009	28	21-40	White	I	T1	N0	M0	Localized	Yes	No/Unknown	Alive	92	Alive
3545187	2007	37	21-40	White	I	T1	N0	M0	Localized	Yes	No/Unknown	Alive	112	Alive
3545243	2008	39	21-40	White	I	T1	N0	M0	Localized	Yes	Yes	Alive	99	Alive
3545273	2007	51	41-60	Black	III	T1	N2	M0	Regional	Yes	No/Unknown	Alive	97	Alive
3545702	2009	22	21-40	White	III	T2	N1	M0	Regional	Yes	No/Unknown	Alive	93	Alive
3546738	2009	33	21-40	White	I	T1	N0	M0	Localized	Yes	No/Unknown	Alive	93	Alive
3546799	2009	30	21-40	Black	I	T2	N0	M0	Localized	Yes	Yes	Alive	92	Alive
3547778	2009	47	41-60	White	I	T1	N0	M0	Localized	Yes	Yes	Alive	94	Alive
3548012	2009	25	21-40	White	I	T1	N0	M0	Localized	Yes	No/Unknown	Alive	93	Alive
3548165	2009	30	21-40	White	I	T1	N0	M0	Localized	Yes	No/Unknown	Alive	94	Alive
3548174	2009	15	0-20	White	I	T1	N0	M0	Localized	Yes	No/Unknown	Alive	95	Alive
3549950	2009	27	21-40	Others	III	T1	N0	M1	Distant	Yes	No/Unknown	Testis	23	Dead
3551544	2009	30	21-40	White	I	T1	N0	M0	Localized	Yes	No/Unknown	Alive	83	Alive
3552941	2009	48	41-60	White	I	T1	N0	M0	Localized	Yes	Yes	Alive	92	Alive
3553249	2009	52	41-60	White	I	T1	N0	M0	Localized	Yes	No/Unknown	Alive	89	Alive
3553257	2009	26	21-40	White	III	T1	N2	M1	Distant	Yes	No/Unknown	Alive	54	Alive
3553468	2009	21	21-40	White	I	T2	N0	M0	Regional	Yes	No/Unknown	Alive	90	Alive
3553600	2009	32	21-40	White	I	T2	N0	M0	Localized	Yes	No/Unknown	Alive	92	Alive
3554096	2009	39	21-40	Others	I	T1	N0	M0	Localized	Yes	No/Unknown	Alive	91	Alive
3554643	2009	24	21-40	White	II	T2	N1	M0	Regional	Yes	No/Unknown	Alive	90	Alive
3555124	2009	29	21-40	White	I	T2	N0	M0	Localized	Yes	Yes	Alive	91	Alive
3555166	2009	26	21-40	White	I	T1	N0	M0	Localized	Yes	No/Unknown	Alive	82	Alive
3555505	2009	29	21-40	White	I	T1	N0	M0	Localized	Yes	No/Unknown	Alive	90	Alive
3555594	2009	42	41-60	White	I	T1	N0	M0	Localized	Yes	No/Unknown	Alive	91	Alive
3556324	2009	18	0-20	White	I	T1	N0	M0	Localized	Yes	Yes	Alive	77	Alive
3556875	2009	26	21-40	Others	I	T1	N0	M0	Localized	Yes	Yes	Alive	93	Alive
3557007	2009	29	21-40	White	I	T1	N0	M0	Localized	Yes	No/Unknown	Alive	91	Alive
3557259	2009	60	41-60	Others	I	T1	N0	M0	Localized	Yes	No/Unknown	Alive	92	Alive
3558810	2009	23	21-40	White	III	T3	N0	M1	Distant	Yes	No/Unknown	Testis	23	Dead
3559505	2008	56	41-60	White	I	T1	N0	M0	Localized	Yes	No/Unknown	Alive	99	Alive
3559921	2009	28	21-40	White	III	T1	N1	M1	Distant	Yes	No/Unknown	Alive	86	Alive
3560068	2009	34	21-40	White	I	T1	N0	M0	Localized	Yes	Yes	Alive	87	Alive
3560377	2009	35	21-40	White	I	T1	N0	M0	Localized	Yes	Yes	Alive	89	Alive
3561027	2009	42	41-60	White	II	T1	N1	M0	Regional	Yes	Yes	Alive	90	Alive
3561676	2009	20	0-20	White	II	T1	N2	M0	Regional	Yes	No/Unknown	Alive	88	Alive
3561750	2009	25	21-40	White	I	T2	N0	M0	Regional	Yes	No/Unknown	Alive	88	Alive
3561968	2009	35	21-40	Others	I	T1	N0	M0	Localized	Yes	Yes	Alive	89	Alive
3561974	2009	42	41-60	White	II	T1	N1	M0	Regional	Yes	Yes	Alive	89	Alive
3563488	2009	46	41-60	White	I	T1	N0	M0	Localized	Yes	Yes	Alive	88	Alive
3563822	2009	44	41-60	White	I	T2	N0	M0	Localized	Yes	No/Unknown	Alive	63	Alive
3564037	2008	30	21-40	White	I	T1	N0	M0	Localized	Yes	No/Unknown	Alive	99	Alive
3564183	2008	25	21-40	White	III	T2	N1	M1	Distant	Yes	No/Unknown	Alive	96	Alive
3564346	2008	37	21-40	Black	III	T1	N1	M1	Distant	Yes	No/Unknown	Alive	104	Alive
3564517	2009	40	21-40	White	I	T2	N0	M0	Localized	Yes	No/Unknown	Alive	85	Alive
3564809	2009	46	41-60	White	II	T1	N2	M0	Regional	Yes	No/Unknown	Alive	87	Alive
3565332	2009	24	21-40	White	I	T1	N0	M0	Localized	Yes	Yes	Alive	90	Alive
3565459	2009	22	21-40	White	II	T1	N1	M0	Regional	Yes	No/Unknown	Alive	87	Alive
3967785	2009	23	21-40	White	I	T1	N0	M0	Localized	Yes	No/Unknown	Alive	85	Alive
3968004	2009	26	21-40	White	II	T1	N2	M0	Regional	Yes	No/Unknown	Alive	88	Alive
3968052	2009	28	21-40	White	I	T1	N0	M0	Localized	Yes	No/Unknown	Alive	69	Alive
3968777	2009	32	21-40	White	I	T1	N0	M0	Localized	Yes	No/Unknown	Alive	88	Alive
3969251	2009	29	21-40	White	I	T2	N0	M0	Localized	Yes	No/Unknown	Alive	90	Alive
3969557	2009	36	21-40	White	I	T1	N0	M0	Localized	Yes	No/Unknown	Alive	87	Alive
3970337	2009	20	0-20	Others	I	T2	N0	M0	Localized	Yes	No/Unknown	Alive	5	Alive
3970680	2009	28	21-40	Others	I	T1	N0	M0	Localized	Yes	No/Unknown	Alive	86	Alive
3970790	2009	21	21-40	White	I	T1	N0	M0	Localized	Yes	No/Unknown	Alive	85	Alive
3971106	2009	25	21-40	White	III	T2	N2	M1	Distant	Yes	No/Unknown	Testis	4	Dead
3971222	2009	19	0-20	White	II	T2	N2	M0	Regional	Yes	No/Unknown	Alive	86	Alive
3971272	2009	33	21-40	White	I	T1	N0	M0	Localized	Yes	No/Unknown	Alive	85	Alive
3971831	2009	24	21-40	Others	III	T1	N1	M1	Distant	Yes	No/Unknown	Testis	17	Dead
3972304	2009	40	21-40	Black	I	T1	N0	M0	Regional	Yes	Yes	Alive	88	Alive
3972591	2009	43	41-60	White	I	T1	N0	M0	Localized	Yes	No/Unknown	Alive	84	Alive
3972802	2009	59	41-60	Black	I	T2	N0	M0	Localized	Yes	Yes	Alive	87	Alive
3972908	2009	27	21-40	White	I	T1	N0	M0	Localized	Yes	No/Unknown	Alive	0	Alive
3974546	2009	42	41-60	White	III	T1	N3	M1	Distant	Yes	No/Unknown	Alive	84	Alive
3974790	2009	34	21-40	White	III	T3	N0	M1	Distant	Yes	No/Unknown	Alive	86	Alive
3974975	2009	34	21-40	White	I	T1	N0	M0	Localized	Yes	No/Unknown	Alive	87	Alive
3975609	2009	30	21-40	White	I	T1	N0	M0	Localized	Yes	No/Unknown	Alive	84	Alive
3977067	2009	37	21-40	White	I	T1	N0	M0	Regional	Yes	Yes	Alive	87	Alive
3977374	2009	56	41-60	White	I	T2	N0	M0	Regional	Yes	Yes	Alive	86	Alive
3977776	2009	24	21-40	White	I	T2	N0	M0	Regional	Yes	No/Unknown	Alive	86	Alive
3978513	2009	39	21-40	White	III	T2	N1	M1	Distant	Yes	No/Unknown	Alive	84	Alive
3979696	2009	27	21-40	Others	I	T1	N0	M0	Regional	Yes	No/Unknown	Alive	89	Alive
3979985	2009	41	41-60	White	I	T1	N0	M0	Localized	Yes	No/Unknown	Alive	94	Alive
3979987	2009	42	41-60	White	I	T1	N0	M0	Localized	Yes	No/Unknown	Alive	94	Alive
3980553	2009	39	21-40	White	I	T1	N0	M0	Localized	Yes	No/Unknown	Alive	85	Alive
3980752	2009	27	21-40	White	I	T1	N0	M0	Localized	Yes	No/Unknown	Alive	77	Alive
3981251	2009	31	21-40	White	I	T2	N0	M0	Localized	Yes	No/Unknown	Alive	8	Alive
3981929	2009	44	41-60	Others	I	T1	N0	M0	Localized	Yes	No/Unknown	Alive	87	Alive
3982050	2009	48	41-60	White	III	T1	N3	M1	Regional	Yes	No/Unknown	Alive	84	Alive
3982088	2009	39	21-40	White	I	T1	N0	M0	Localized	Yes	No/Unknown	Alive	85	Alive
3982437	2008	62	>60	White	I	T1	N0	M0	Localized	Yes	No/Unknown	Alive	98	Alive
3982552	2009	29	21-40	Others	I	T2	N0	M0	Localized	Yes	No/Unknown	Alive	93	Alive
3982555	2009	53	41-60	White	I	T1	N0	M0	Localized	Yes	No/Unknown	Alive	95	Alive
3982924	2008	29	21-40	White	I	T1	N0	M0	Localized	Yes	No/Unknown	Alive	100	Alive
3983194	2009	48	41-60	White	I	T1	N0	M0	Localized	Yes	No/Unknown	Alive	87	Alive
3983201	2009	44	41-60	White	I	T1	N0	M0	Localized	Yes	No/Unknown	Alive	87	Alive
3983452	2009	34	21-40	White	I	T2	N0	M0	Regional	Yes	No/Unknown	Alive	85	Alive
3983483	2009	43	41-60	Others	I	T2	N0	M0	Localized	Yes	No/Unknown	Alive	87	Alive
3983524	2009	32	21-40	White	III	T2	N0	M1	Distant	Yes	No/Unknown	Alive	87	Alive
3983849	2009	22	21-40	White	I	T1	N0	M0	Localized	Yes	No/Unknown	Alive	87	Alive
3983857	2008	20	0-20	Others	I	T1	N0	M0	Localized	Yes	No/Unknown	Alive	98	Alive
3984339	2010	49	41-60	Others	I	T3	N0	M0	Regional	Yes	No/Unknown	Alive	82	Alive
3986479	2010	30	21-40	White	I	T1	N0	M0	Localized	Yes	Yes	Alive	61	Alive
3987169	2010	42	41-60	White	I	T1	N0	M0	Localized	Yes	No/Unknown	Alive	81	Alive
3987177	2010	0	0-20	Others	I	T1	N0	M0	Localized	Yes	No/Unknown	Alive	82	Alive
3987574	2010	28	21-40	White	I	T2	N0	M0	Localized	Yes	No/Unknown	Alive	79	Alive
3988340	2010	39	21-40	White	I	T1	N0	M0	Localized	Yes	No/Unknown	Alive	77	Alive
3989508	2010	22	21-40	Others	II	T2	N2	M0	Regional	Yes	No/Unknown	Alive	83	Alive
3989565	2010	29	21-40	Others	III	T2	N1	M1	Distant	Yes	No/Unknown	Testis	40	Dead
3989631	2010	35	21-40	White	I	T1	N0	M0	Localized	Yes	No/Unknown	Alive	80	Alive
3989717	2010	23	21-40	Others	I	T2	N0	M0	Localized	Yes	No/Unknown	Alive	78	Alive
3989932	2010	38	21-40	White	I	T1	N0	M0	Localized	Yes	No/Unknown	Alive	81	Alive
3989938	2010	27	21-40	White	I	T1	N0	M0	Localized	Yes	No/Unknown	Alive	78	Alive
3990765	2010	16	0-20	Others	I	T1	N0	M0	Localized	Yes	No/Unknown	Alive	76	Alive
3990982	2010	18	0-20	White	III	T3	N1	M1	Distant	Yes	No/Unknown	Alive	79	Alive
3991809	2010	48	41-60	White	I	T2	N0	M0	Localized	Yes	No/Unknown	Alive	83	Alive
3993517	2010	36	21-40	White	I	T1	N0	M0	Localized	Yes	Yes	Alive	77	Alive
3993589	2010	30	21-40	White	I	T1	N0	M0	Localized	Yes	No/Unknown	Alive	77	Alive
3993819	2010	43	41-60	White	I	T1	N0	M0	Localized	Yes	No/Unknown	Alive	75	Alive
3994814	2010	27	21-40	White	III	T1	N1	M1	Distant	Yes	No/Unknown	Alive	83	Alive
3994894	2010	16	0-20	White	II	T2	N1	M0	Regional	Yes	No/Unknown	Alive	77	Alive
3994949	2009	47	41-60	White	I	T1	N0	M0	Localized	Yes	Yes	Alive	95	Alive
3995131	2010	41	41-60	White	I	T2	N0	M0	Localized	Yes	No/Unknown	Alive	78	Alive
3995189	2010	34	21-40	White	I	T1	N0	M0	Localized	Yes	Yes	Alive	83	Alive
3995447	2010	35	21-40	White	I	T1	N0	M0	Localized	Yes	No/Unknown	Alive	83	Alive
3996337	2010	41	41-60	White	II	T1	N1	M0	Regional	Yes	Yes	Alive	81	Alive
3996483	2009	24	21-40	Others	I	T1	N0	M0	Localized	Yes	No/Unknown	Alive	91	Alive
3996622	2010	41	41-60	White	II	T1	N1	M0	Regional	Yes	No/Unknown	Alive	77	Alive
3997552	2010	33	21-40	White	I	T1	N0	M0	Localized	Yes	No/Unknown	Alive	77	Alive
3998075	2010	61	>60	White	I	T1	N0	M0	Localized	Yes	No/Unknown	Alive	77	Alive
3999550	2010	48	41-60	White	II	T1	N2	M0	Regional	Yes	No/Unknown	Alive	74	Alive
3999617	2010	31	21-40	White	I	T1	N0	M0	Localized	Yes	No/Unknown	Alive	34	Alive
3999622	2010	34	21-40	Others	I	T1	N0	M0	Localized	Yes	No/Unknown	Alive	81	Alive
3999981	2010	26	21-40	White	I	T1	N0	M0	Localized	Yes	No/Unknown	Alive	76	Alive
4000576	2010	23	21-40	White	I	T2	N0	M0	Localized	Yes	No/Unknown	Alive	76	Alive
4000837	2010	43	41-60	White	II	T1	N3	M0	Regional	Yes	No/Unknown	Alive	81	Alive
4001386	2010	43	41-60	White	I	T1	N0	M0	Localized	Yes	No/Unknown	Alive	79	Alive
4001895	2010	37	21-40	White	I	T1	N0	M0	Localized	Yes	No/Unknown	Alive	75	Alive
4001929	2010	41	41-60	White	I	T1	N0	M0	Localized	Yes	Yes	Alive	78	Alive
4002097	2010	25	21-40	White	III	T2	N1	M1	Distant	Yes	Yes	Testis	10	Dead
4002158	2010	46	41-60	White	III	T2	N1	M1	Distant	Yes	No/Unknown	Testis	38	Dead
4002804	2010	26	21-40	White	I	T1	N0	M0	Localized	Yes	No/Unknown	Alive	75	Alive
4002982	2010	30	21-40	Others	II	T1	N1	M0	Regional	Yes	Yes	Alive	73	Alive
4003338	2010	28	21-40	White	II	T3	N3	M0	Regional	Yes	No/Unknown	Alive	78	Alive
4003740	2010	30	21-40	White	I	T2	N0	M0	Localized	Yes	No/Unknown	Alive	79	Alive
4003745	2010	20	0-20	Black	I	T2	N0	M0	Localized	Yes	No/Unknown	Alive	79	Alive
4003914	2010	29	21-40	White	III	T1	N2	M1	Distant	Yes	No/Unknown	Alive	72	Alive
4004111	2010	21	21-40	White	I	T2	N0	M0	Localized	Yes	No/Unknown	Alive	75	Alive
4004360	2010	42	41-60	Others	I	T1	N0	M0	Localized	Yes	Yes	Alive	78	Alive
4004486	2010	49	41-60	White	I	T4	N0	M0	Regional	Yes	Yes	Alive	80	Alive
4004487	2010	25	21-40	White	I	T1	N0	M0	Localized	Yes	No/Unknown	Alive	79	Alive
4004966	2010	3	0-20	Others	I	T1	N0	M0	Localized	Yes	No/Unknown	Alive	74	Alive
4005257	2010	23	21-40	Others	I	T1	N0	M0	Localized	Yes	No/Unknown	Alive	76	Alive
4005294	2010	30	21-40	White	I	T2	N0	M0	Localized	Yes	No/Unknown	Alive	76	Alive
4005839	2010	25	21-40	White	I	T1	N0	M0	Localized	Yes	No/Unknown	Alive	73	Alive
4006154	2010	37	21-40	White	I	T1	N0	M0	Localized	Yes	No/Unknown	Alive	77	Alive
4007136	2010	29	21-40	Others	I	T1	N0	M0	Localized	Yes	No/Unknown	Alive	24	Alive
4007309	2010	33	21-40	Black	I	T2	N0	M0	Localized	Yes	Yes	Alive	80	Alive
4007373	2010	19	0-20	White	I	T1	N0	M0	Localized	Yes	Yes	Alive	74	Alive
4007826	2010	39	21-40	White	I	T1	N0	M0	Localized	Yes	No/Unknown	Alive	78	Alive
4007943	2010	27	21-40	White	I	T1	N0	M0	Localized	Yes	No/Unknown	Alive	82	Alive
4007998	2010	36	21-40	White	I	T1	N0	M0	Localized	Yes	Yes	Alive	83	Alive
4008000	2010	27	21-40	White	I	T1	N0	M0	Localized	Yes	No/Unknown	Alive	83	Alive
4008046	2010	40	21-40	White	I	T2	N0	M0	Localized	Yes	No/Unknown	Alive	72	Alive
4008518	2010	15	0-20	White	I	T1	N0	M0	Localized	Yes	No/Unknown	Miscellaneous Malignant Cancer	15	Dead
4008891	2010	27	21-40	White	I	T2	N0	M0	Localized	Yes	No/Unknown	Alive	77	Alive
4008893	2010	32	21-40	White	I	T1	N0	M0	Localized	Yes	No/Unknown	Alive	79	Alive
4009091	2010	29	21-40	White	II	T1	N2	M0	Regional	Yes	No/Unknown	Alive	80	Alive
4009610	2010	47	41-60	White	I	T1	N0	M0	Localized	Yes	No/Unknown	Alive	76	Alive
4010009	2010	61	>60	White	I	T1	N0	M0	Localized	Yes	Yes	Alive	76	Alive
4010564	2010	29	21-40	White	I	T1	N0	M0	Localized	Yes	No/Unknown	Alive	72	Alive
4012270	2010	53	41-60	White	I	T1	N0	M0	Localized	Yes	No/Unknown	Alive	72	Alive
4012407	2010	62	>60	White	III	T3	N1	M1	Distant	Yes	No/Unknown	Diseases of Heart	12	Dead
4012585	2010	20	0-20	White	I	T1	N0	M0	Localized	Yes	No/Unknown	Alive	74	Alive
4012668	2010	29	21-40	Others	II	T1	N2	M0	Regional	Yes	No/Unknown	Alive	72	Alive
4013166	2009	46	41-60	Others	I	T1	N0	M0	Regional	Yes	No/Unknown	Alive	91	Alive
4013432	2010	36	21-40	White	III	T3	N3	M1	Distant	Yes	No/Unknown	Testis	0	Dead
4013462	2010	32	21-40	White	III	T1	N1	M1	Distant	Yes	No/Unknown	Alive	62	Alive
4014841	2010	32	21-40	White	I	T2	N0	M0	Localized	Yes	No/Unknown	Alive	75	Alive
4015499	2010	26	21-40	White	III	T4	N3	M0	Distant	Yes	No/Unknown	Testis	2	Dead
4015523	2010	37	21-40	White	I	T1	N0	M0	Localized	Yes	No/Unknown	Alive	73	Alive
4016355	2010	28	21-40	White	I	T1	N0	M0	Localized	Yes	No/Unknown	Alive	77	Alive
4016363	2010	37	21-40	White	I	T1	N0	M0	Localized	Yes	No/Unknown	Alive	82	Alive
4016366	2010	26	21-40	White	I	T1	N0	M0	Localized	Yes	No/Unknown	Alive	72	Alive
4017131	2010	44	41-60	White	I	T1	N0	M0	Localized	Yes	No/Unknown	Alive	76	Alive
4018123	2010	18	0-20	White	III	T1	N3	M1	Distant	Yes	No/Unknown	Alive	72	Alive
4021399	2010	40	21-40	White	III	T1	N1	M0	Regional	Yes	Yes	Alive	77	Alive
4021941	2011	64	>60	White	III	T1	N0	M1	Distant	Yes	No/Unknown	Testis	2	Dead
4022408	2010	20	0-20	White	I	T1	N0	M0	Regional	Yes	No/Unknown	Alive	72	Alive
4022411	2010	31	21-40	White	I	T2	N0	M0	Localized	Yes	No/Unknown	Alive	1	Alive
4022993	2010	26	21-40	White	II	T2	N3	M0	Regional	Yes	No/Unknown	Alive	77	Alive
4024792	2010	47	41-60	Black	III	T1	N1	M1	Distant	Yes	No/Unknown	Accidents and Adverse Effects	15	Dead
4025112	2011	25	21-40	White	I	T2	N0	M0	Localized	Yes	No/Unknown	Alive	69	Alive
4026406	2010	39	21-40	White	I	T2	N0	M0	Localized	Yes	No/Unknown	Alive	73	Alive
4027032	2011	32	21-40	White	I	T2	N0	M0	Localized	Yes	No/Unknown	Alive	70	Alive
4027564	2010	32	21-40	White	I	T1	N0	M0	Localized	Yes	No/Unknown	Alive	73	Alive
4027774	2010	21	21-40	White	II	T1	N2	M0	Regional	Yes	No/Unknown	Alive	75	Alive
4029435	2011	47	41-60	Others	II	T1	N1	M0	Regional	Yes	No/Unknown	Alive	69	Alive
4029730	2010	26	21-40	White	I	T1	N0	M0	Localized	Yes	No/Unknown	Alive	73	Alive
4031508	2011	34	21-40	White	I	T1	N0	M0	Localized	Yes	No/Unknown	Alive	69	Alive
4032602	2010	29	21-40	White	III	T1	N0	M1	Distant	Yes	No/Unknown	Alive	2	Alive
4033825	2011	54	41-60	White	II	T1	N1	M0	Regional	Yes	No/Unknown	Alive	69	Alive
4033843	2011	48	41-60	White	I	T1	N0	M0	Localized	Yes	No/Unknown	Alive	67	Alive
4033880	2010	49	41-60	White	I	T2	N0	M0	Localized	Yes	No/Unknown	Alive	73	Alive
4033910	2011	41	41-60	White	I	T1	N0	M0	Localized	Yes	Yes	Alive	70	Alive
4033919	2011	29	21-40	White	I	T1	N0	M0	Localized	Yes	No/Unknown	Alive	17	Alive
4033922	2011	23	21-40	Black	II	T1	N1	M0	Regional	Yes	No/Unknown	Alive	65	Alive
4033923	2011	48	41-60	White	II	T3	N3	M0	Regional	Yes	No/Unknown	Alive	67	Alive
4033925	2011	30	21-40	White	I	T1	N0	M0	Localized	Yes	No/Unknown	Alive	69	Alive
4033928	2011	17	0-20	Others	III	T3	N2	M1	Distant	Yes	No/Unknown	Alive	68	Alive
4033930	2011	35	21-40	White	I	T1	N0	M0	Localized	Yes	Yes	Alive	67	Alive
4033932	2011	25	21-40	White	II	T1	N3	M0	Regional	Yes	No/Unknown	Alive	59	Alive
4033945	2011	60	41-60	White	I	T2	N0	M0	Localized	Yes	No/Unknown	Alive	67	Alive
4033946	2011	57	41-60	Others	I	T1	N0	M0	Localized	Yes	No/Unknown	Alive	68	Alive
4033949	2011	28	21-40	White	II	T1	N3	M0	Regional	Yes	No/Unknown	Alive	68	Alive
4033951	2011	28	21-40	White	I	T1	N0	M0	Localized	Yes	Yes	Alive	67	Alive
4035978	2010	33	21-40	White	I	T1	N0	M0	Localized	Yes	No/Unknown	Alive	81	Alive
4036520	2011	35	21-40	White	I	T1	N0	M0	Localized	Yes	No/Unknown	Alive	50	Alive
4036524	2011	29	21-40	White	I	T2	N0	M0	Localized	Yes	No/Unknown	Alive	65	Alive
4036525	2011	33	21-40	White	I	T1	N0	M0	Localized	Yes	No/Unknown	Alive	71	Alive
4036528	2011	34	21-40	White	I	T2	N0	M0	Localized	Yes	No/Unknown	Alive	71	Alive
4036530	2011	36	21-40	White	I	T1	N0	M0	Localized	Yes	No/Unknown	Alive	67	Alive
4037143	2010	25	21-40	White	I	T1	N0	M0	Localized	Yes	No/Unknown	Alive	12	Alive
4038137	2011	34	21-40	Others	I	T1	N0	M0	Localized	Yes	No/Unknown	Alive	68	Alive
4038140	2011	50	41-60	White	II	T1	N2	M0	Regional	Yes	Yes	Alive	68	Alive
4038143	2011	45	41-60	White	I	T1	N0	M0	Localized	Yes	Yes	Alive	67	Alive
4038145	2011	42	41-60	White	I	T1	N0	M0	Localized	Yes	Yes	Alive	67	Alive
4038146	2011	47	41-60	White	I	T2	N0	M0	Localized	Yes	No/Unknown	Alive	65	Alive
4038956	2010	47	41-60	Black	I	T1	N0	M0	Regional	Yes	No/Unknown	Alive	73	Alive
4039627	2010	33	21-40	White	I	T1	N0	M0	Localized	Yes	No/Unknown	Alive	74	Alive
4041503	2010	34	21-40	White	I	T1	N0	M0	Localized	Yes	No/Unknown	Alive	66	Alive
4043302	2010	22	21-40	White	I	T1	N0	M0	Localized	Yes	No/Unknown	Alive	80	Alive
4044088	2011	42	41-60	White	I	T1	N0	M0	Localized	Yes	No/Unknown	Alive	69	Alive
4044135	2011	80	>60	White	I	T1	N0	M0	Localized	Yes	No/Unknown	Alive	68	Alive
4044174	2011	30	21-40	White	I	T1	N0	M0	Localized	Yes	No/Unknown	Alive	66	Alive
4044287	2011	26	21-40	White	I	T1	N0	M0	Localized	Yes	No/Unknown	Alive	66	Alive
4045141	2011	40	21-40	Others	I	T1	N0	M0	Localized	Yes	No/Unknown	Alive	67	Alive
4046450	2011	21	21-40	White	III	T2	N1	M1	Distant	Yes	No/Unknown	Alive	65	Alive
4046451	2011	43	41-60	White	II	T1	N1	M0	Regional	Yes	Yes	Alive	65	Alive
4046459	2011	42	41-60	White	II	T1	N1	M0	Regional	Yes	Yes	Alive	64	Alive
4046553	2011	44	41-60	White	I	T2	N0	M0	Localized	Yes	No/Unknown	Alive	66	Alive
4046824	2011	32	21-40	White	III	T1	N3	M1	Distant	Yes	No/Unknown	Testis	2	Dead
4046906	2011	31	21-40	White	I	T1	N0	M0	Localized	Yes	No/Unknown	Alive	67	Alive
4047015	2011	28	21-40	White	I	T1	N0	M0	Localized	Yes	No/Unknown	Alive	66	Alive
4047724	2011	24	21-40	Others	I	T3	N0	M0	Regional	Yes	No/Unknown	Alive	68	Alive
4047726	2011	32	21-40	White	I	T1	N0	M0	Localized	Yes	No/Unknown	Alive	64	Alive
4048167	2011	33	21-40	White	I	T1	N0	M0	Localized	Yes	Yes	Alive	65	Alive
4049138	2011	43	41-60	White	I	T1	N0	M0	Localized	Yes	No/Unknown	Alive	63	Alive
4049621	2011	34	21-40	White	I	T1	N0	M0	Localized	Yes	No/Unknown	Alive	7	Alive
4050750	2011	50	41-60	White	II	T1	N3	M0	Regional	Yes	No/Unknown	Alive	64	Alive
4050761	2011	20	0-20	White	II	T1	N2	M0	Regional	Yes	No/Unknown	Alive	61	Alive
4050936	2011	31	21-40	White	I	T1	N0	M0	Localized	Yes	No/Unknown	Alive	69	Alive
4050981	2011	37	21-40	White	III	T1	N1	M1	Distant	Yes	No/Unknown	Alive	65	Alive
4051030	2011	26	21-40	Others	II	T3	N1	M0	Regional	Yes	No/Unknown	Alive	61	Alive
4051099	2011	47	41-60	White	I	T1	N0	M0	Localized	Yes	No/Unknown	Alive	61	Alive
4051206	2011	39	21-40	Others	I	T1	N0	M0	Localized	Yes	No/Unknown	Alive	62	Alive
4051381	2011	35	21-40	White	I	T1	N0	M0	Localized	Yes	No/Unknown	Alive	63	Alive
4051506	2011	36	21-40	White	I	T1	N0	M0	Localized	Yes	No/Unknown	Alive	62	Alive
4051621	2011	26	21-40	White	I	T2	N0	M0	Localized	Yes	No/Unknown	Alive	65	Alive
4051652	2011	26	21-40	White	I	T1	N0	M0	Localized	Yes	No/Unknown	Alive	64	Alive
4051655	2011	40	21-40	White	I	T1	N0	M0	Localized	Yes	No/Unknown	Alive	63	Alive
4051667	2011	36	21-40	White	I	T2	N0	M0	Localized	Yes	No/Unknown	Alive	63	Alive
4051841	2011	38	21-40	White	I	T1	N0	M0	Localized	Yes	No/Unknown	Alive	53	Alive
4052155	2011	55	41-60	White	III	T1	N0	M1	Regional	Yes	Yes	Alive	63	Alive
4052409	2011	40	21-40	White	I	T1	N0	M0	Localized	Yes	No/Unknown	Alive	61	Alive
4052494	2011	33	21-40	White	I	T1	N0	M0	Localized	Yes	Yes	Alive	37	Alive
4053179	2011	33	21-40	White	III	T1	N3	M0	Regional	Yes	No/Unknown	Alive	63	Alive
4053280	2011	47	41-60	White	I	T1	N0	M0	Localized	Yes	No/Unknown	Alive	62	Alive
4053958	2011	38	21-40	White	I	T1	N0	M0	Localized	Yes	No/Unknown	Alive	62	Alive
4054343	2011	26	21-40	White	II	T1	N1	M0	Regional	Yes	Yes	Alive	62	Alive
4054384	2011	32	21-40	White	I	T1	N0	M0	Localized	Yes	No/Unknown	Alive	60	Alive
4054765	2011	35	21-40	White	I	T1	N0	M0	Localized	Yes	Yes	Alive	63	Alive
4055092	2011	40	21-40	White	I	T1	N0	M0	Localized	Yes	No/Unknown	Alive	60	Alive
4055147	2011	21	21-40	White	II	T2	N2	M0	Regional	Yes	No/Unknown	Alive	61	Alive
4055683	2011	29	21-40	White	I	T1	N0	M0	Regional	Yes	No/Unknown	Alive	61	Alive
4055799	2011	28	21-40	White	I	T2	N0	M0	Localized	Yes	No/Unknown	Alive	2	Alive
4056331	2011	60	41-60	Others	I	T1	N0	M0	Localized	Yes	No/Unknown	Alive	64	Alive
4056548	2011	19	0-20	White	I	T1	N0	M0	Localized	Yes	No/Unknown	Alive	61	Alive
4058074	2011	40	21-40	White	I	T2	N0	M0	Localized	Yes	No/Unknown	Alive	63	Alive
4058077	2011	40	21-40	White	I	T1	N0	M0	Localized	Yes	No/Unknown	Alive	39	Alive
4058142	2012	27	21-40	Black	II	T2	N3	M0	Regional	Yes	No/Unknown	Alive	48	Alive
4058522	2011	21	21-40	White	I	T2	N0	M0	Regional	Yes	No/Unknown	Alive	60	Alive
4059030	2011	46	41-60	White	I	T1	N0	M0	Localized	Yes	No/Unknown	Alive	28	Alive
4059463	2011	2	0-20	White	III	T3	N1	M1	Distant	Yes	No/Unknown	Alive	60	Alive
4059919	2011	33	21-40	White	I	T1	N0	M0	Localized	Yes	No/Unknown	Alive	60	Alive
4060252	2011	34	21-40	White	I	T1	N0	M0	Localized	Yes	No/Unknown	Alive	64	Alive
4060253	2011	41	41-60	White	I	T1	N0	M0	Localized	Yes	No/Unknown	Alive	61	Alive
4060532	2011	36	21-40	Others	I	T1	N0	M0	Localized	Yes	No/Unknown	Alive	66	Alive
4061281	2012	21	21-40	White	II	T1	N2	M0	Regional	Yes	No/Unknown	Alive	59	Alive
4061311	2011	61	>60	White	I	T2	N0	M0	Localized	Yes	No/Unknown	Alive	69	Alive
4061886	2009	31	21-40	White	I	T1	N0	M0	Localized	Yes	No/Unknown	Alive	87	Alive
4062872	2011	28	21-40	White	I	T1	N0	M0	Localized	Yes	No/Unknown	Alive	65	Alive
4062941	2012	27	21-40	White	III	T3	N0	M1	Distant	Yes	No/Unknown	Alive	52	Alive
4063188	2012	35	21-40	White	I	T1	N0	M0	Localized	Yes	No/Unknown	Alive	59	Alive
4063371	2012	25	21-40	White	I	T1	N0	M0	Localized	Yes	No/Unknown	Alive	59	Alive
4063626	2011	26	21-40	Others	I	T1	N0	M0	Localized	Yes	No/Unknown	Alive	61	Alive
4063912	2011	27	21-40	White	I	T1	N0	M0	Localized	Yes	No/Unknown	Alive	63	Alive
4064291	2011	53	41-60	White	I	T2	N0	M0	Localized	Yes	No/Unknown	Alive	61	Alive
4065470	2011	22	21-40	Others	II	T2	N2	M0	Regional	Yes	No/Unknown	Alive	70	Alive
4065521	2011	24	21-40	White	I	T1	N0	M0	Localized	Yes	No/Unknown	Alive	60	Alive
4065834	2012	46	41-60	White	II	T2	N1	M0	Regional	Yes	No/Unknown	Alive	57	Alive
4065997	2011	47	41-60	White	I	T1	N0	M0	Localized	Yes	No/Unknown	Alive	61	Alive
4067639	2012	38	21-40	White	I	T1	N0	M0	Localized	Yes	Yes	Alive	49	Alive
4069078	2012	31	21-40	White	I	T1	N0	M0	Localized	Yes	No/Unknown	Alive	55	Alive
4070316	2012	40	21-40	White	I	T1	N0	M0	Localized	Yes	No/Unknown	Homicide and Legal Intervention	21	Dead
4070563	2012	45	41-60	Others	I	T1	N0	M0	Localized	Yes	Yes	Alive	58	Alive
4070685	2012	28	21-40	White	III	T3	N2	M1	Distant	Yes	No/Unknown	Alive	46	Alive
4072194	2012	21	21-40	White	III	T1	N0	M1	Distant	Yes	No/Unknown	Alive	58	Alive
4073310	2012	25	21-40	White	I	T1	N0	M0	Regional	Yes	No/Unknown	Alive	58	Alive
4074556	2012	38	21-40	White	I	T1	N0	M0	Localized	Yes	No/Unknown	Alive	55	Alive
4074640	2012	33	21-40	White	I	T1	N0	M0	Localized	Yes	No/Unknown	Alive	56	Alive
4075008	2012	19	0-20	White	I	T1	N0	M0	Localized	Yes	Yes	Alive	56	Alive
4075315	2012	33	21-40	White	I	T2	N0	M0	Localized	Yes	No/Unknown	Alive	0	Alive
4075503	2012	37	21-40	White	I	T1	N0	M0	Localized	Yes	No/Unknown	Alive	56	Alive
4075816	2012	48	41-60	White	II	T1	N1	M0	Regional	Yes	No/Unknown	Alive	56	Alive
4075952	2012	48	41-60	Others	I	T2	N0	M0	Localized	Yes	No/Unknown	Alive	55	Alive
4076108	2012	24	21-40	White	I	T1	N0	M0	Localized	Yes	No/Unknown	Alive	55	Alive
4076657	2012	26	21-40	White	I	T1	N0	M0	Localized	Yes	No/Unknown	Alive	56	Alive
4077025	2012	35	21-40	White	I	T1	N0	M0	Localized	Yes	Yes	Alive	54	Alive
4077147	2012	35	21-40	White	I	T1	N0	M0	Localized	Yes	No/Unknown	Alive	55	Alive
4077475	2012	28	21-40	Others	I	T1	N0	M0	Localized	Yes	No/Unknown	Alive	56	Alive
4077532	2012	29	21-40	White	I	T1	N0	M0	Localized	Yes	No/Unknown	Alive	58	Alive
4077646	2012	28	21-40	White	I	T1	N0	M0	Localized	Yes	No/Unknown	Alive	54	Alive
4077793	2012	69	>60	Others	II	T1	N1	M0	Regional	Yes	No/Unknown	Miscellaneous Malignant Cancer	2	Dead
4078340	2012	33	21-40	White	III	T1	N3	M1	Regional	Yes	No/Unknown	Alive	43	Alive
4078434	2012	20	0-20	White	I	T1	N0	M0	Localized	Yes	No/Unknown	Alive	50	Alive
4079062	2012	34	21-40	White	I	T1	N0	M0	Localized	Yes	No/Unknown	Alive	57	Alive
4080279	2012	37	21-40	White	I	T1	N0	M0	Localized	Yes	No/Unknown	Alive	52	Alive
4080324	2012	25	21-40	White	III	T1	N3	M0	Regional	Yes	No/Unknown	Alive	54	Alive
4080379	2012	37	21-40	White	I	T1	N0	M0	Localized	Yes	Yes	Alive	50	Alive
4080973	2012	48	41-60	White	I	T1	N0	M0	Localized	Yes	No/Unknown	Alive	54	Alive
4081089	2012	32	21-40	White	I	T2	N0	M0	Localized	Yes	Yes	Testis	26	Dead
4081347	2012	21	21-40	White	I	T1	N0	M0	Regional	Yes	No/Unknown	Alive	54	Alive
4082553	2012	26	21-40	White	I	T2	N0	M0	Localized	Yes	No/Unknown	Alive	56	Alive
4082863	2012	31	21-40	White	I	T1	N0	M0	Localized	Yes	No/Unknown	Alive	55	Alive
4083198	2012	27	21-40	White	I	T1	N0	M0	Localized	Yes	No/Unknown	Alive	56	Alive
4083449	2012	62	>60	White	I	T1	N0	M0	Localized	Yes	No/Unknown	Alive	55	Alive
4083496	2012	43	41-60	White	II	T1	N2	M0	Regional	Yes	Yes	Alive	52	Alive
4083622	2012	31	21-40	White	II	T2	N1	M0	Distant	Yes	No/Unknown	Alive	51	Alive
4084193	2012	53	41-60	White	I	T1	N0	M0	Localized	Yes	No/Unknown	Alive	55	Alive
4084200	2012	37	21-40	White	III	T3	N0	M1	Distant	Yes	Yes	Testis	14	Dead
4084466	2012	58	41-60	White	III	T1	N3	M1	Distant	Yes	No/Unknown	Alive	53	Alive
4084479	2012	53	41-60	White	II	T2	N1	M0	Regional	Yes	Yes	Alive	53	Alive
4084896	2012	29	21-40	White	I	T2	N0	M0	Localized	Yes	No/Unknown	Alive	50	Alive
4084997	2012	25	21-40	White	II	T1	N2	M0	Regional	Yes	No/Unknown	Alive	53	Alive
4085032	2012	38	21-40	White	I	T2	N0	M0	Localized	Yes	Yes	Alive	2	Alive
4085221	2012	41	41-60	White	I	T1	N0	M0	Localized	Yes	No/Unknown	Alive	49	Alive
4085697	2012	29	21-40	Others	I	T2	N0	M0	Localized	Yes	No/Unknown	Alive	49	Alive
4086652	2012	41	41-60	White	II	T1	N2	M0	Regional	Yes	No/Unknown	Alive	56	Alive
4087414	2012	57	41-60	White	III	T2	N3	M0	Regional	Yes	No/Unknown	Alive	51	Alive
4087507	2012	35	21-40	White	I	T1	N0	M0	Localized	Yes	No/Unknown	Alive	54	Alive
4087712	2011	24	21-40	White	I	T1	N0	M0	Localized	Yes	No/Unknown	Alive	0	Alive
4088114	2012	34	21-40	Black	I	T1	N0	M0	Localized	Yes	Yes	Alive	54	Alive
4088366	2012	26	21-40	White	III	T1	N3	M1	Distant	Yes	No/Unknown	Testis	15	Dead
4088568	2012	27	21-40	White	I	T1	N0	M0	Localized	Yes	Yes	Alive	52	Alive
4089155	2012	52	41-60	White	I	T1	N0	M0	Localized	Yes	No/Unknown	Alive	52	Alive
4089347	2012	50	41-60	White	II	T1	N1	M0	Regional	Yes	Yes	Alive	53	Alive
4089410	2012	25	21-40	White	II	T3	N1	M0	Regional	Yes	Yes	Alive	13	Alive
4089810	2012	43	41-60	White	I	T1	N0	M0	Localized	Yes	No/Unknown	Alive	50	Alive
4089835	2012	34	21-40	White	I	T1	N0	M0	Localized	Yes	No/Unknown	Alive	49	Alive
4089879	2012	22	21-40	White	I	T1	N0	M0	Regional	Yes	No/Unknown	Alive	52	Alive
4090252	2012	37	21-40	White	II	T1	N2	M0	Regional	Yes	No/Unknown	Alive	54	Alive
4090413	2012	35	21-40	White	I	T1	N0	M0	Localized	Yes	No/Unknown	Alive	51	Alive
4090638	2012	29	21-40	White	I	T1	N0	M0	Localized	Yes	No/Unknown	Alive	49	Alive
4090758	2012	34	21-40	White	I	T1	N0	M0	Localized	Yes	No/Unknown	Alive	49	Alive
4092209	2012	33	21-40	White	I	T1	N0	M0	Localized	Yes	No/Unknown	Alive	54	Alive
4092310	2012	47	41-60	White	I	T1	N0	M0	Localized	Yes	No/Unknown	Alive	54	Alive
4092811	2012	48	41-60	White	I	T2	N0	M0	Regional	Yes	No/Unknown	Alive	54	Alive
4093640	2012	29	21-40	White	I	T1	N0	M0	Localized	Yes	No/Unknown	Alive	50	Alive
4094270	2012	19	0-20	Others	I	T1	N0	M0	Localized	Yes	No/Unknown	Alive	49	Alive
4094332	2012	31	21-40	White	I	T1	N0	M0	Regional	Yes	No/Unknown	Alive	26	Alive
4094340	2012	42	41-60	White	I	T1	N0	M0	Localized	Yes	No/Unknown	Chronic Liver Disease and Cirrhosis	35	Dead
4094399	2012	33	21-40	White	II	T1	N1	M0	Regional	Yes	Yes	Alive	50	Alive
4094423	2012	56	41-60	White	II	T1	N1	M0	Regional	Yes	No/Unknown	Alive	48	Alive
4095087	2012	29	21-40	White	II	T1	N1	M0	Regional	Yes	No/Unknown	Alive	58	Alive
4095217	2012	41	41-60	White	I	T1	N0	M0	Localized	Yes	No/Unknown	Alive	50	Alive
4095364	2012	51	41-60	White	I	T1	N0	M0	Localized	Yes	No/Unknown	Alive	53	Alive
4096045	2012	55	41-60	White	I	T1	N0	M0	Localized	Yes	No/Unknown	Alive	49	Alive
4096599	2012	53	41-60	White	I	T1	N0	M0	Localized	Yes	No/Unknown	Alive	40	Alive
4097067	2012	23	21-40	Others	I	T1	N0	M0	Localized	Yes	No/Unknown	Alive	50	Alive
4098775	2012	32	21-40	Others	III	T2	N0	M1	Distant	Yes	No/Unknown	Alive	50	Alive
4098795	2012	43	41-60	White	III	T1	N2	M0	Regional	Yes	No/Unknown	Alive	49	Alive
4098892	2012	37	21-40	White	I	T1	N0	M0	Localized	Yes	Yes	Alive	48	Alive
4099063	2011	21	21-40	White	I	T1	N0	M0	Localized	Yes	No/Unknown	Alive	60	Alive
4099141	2012	55	41-60	White	I	T1	N0	M0	Localized	Yes	No/Unknown	Alive	49	Alive
4099429	2012	38	21-40	Black	I	T1	N0	M0	Localized	Yes	No/Unknown	Alive	48	Alive
4100175	2012	50	41-60	Others	II	T3	N1	M0	Regional	Yes	No/Unknown	Alive	47	Alive
4100270	2012	34	21-40	Others	I	T1	N0	M0	Localized	Yes	No/Unknown	Alive	58	Alive
4100294	2012	33	21-40	White	I	T1	N0	M0	Localized	Yes	No/Unknown	Alive	12	Alive
4100660	2012	37	21-40	White	I	T1	N0	M0	Localized	Yes	No/Unknown	Alive	49	Alive
4100689	2012	35	21-40	White	I	T1	N0	M0	Localized	Yes	No/Unknown	Alive	49	Alive
4101534	2012	24	21-40	White	III	T1	N3	M1	Distant	Yes	No/Unknown	Alive	49	Alive
4102353	2012	26	21-40	White	III	T2	N0	M1	Regional	Yes	No/Unknown	Alive	48	Alive
4102796	2013	28	21-40	Black	II	T2	N1	M0	Regional	Yes	No/Unknown	Alive	47	Alive
4102957	2012	82	>60	White	I	T1	N0	M0	Localized	Yes	No/Unknown	Alive	48	Alive
4103028	2012	31	21-40	White	III	T1	N0	M1	Distant	Yes	No/Unknown	Alive	50	Alive
4103495	2013	35	21-40	White	I	T2	N0	M0	Localized	Yes	No/Unknown	Alive	35	Alive
4103916	2013	40	21-40	White	I	T2	N0	M0	Localized	Yes	No/Unknown	Alive	45	Alive
4104013	2012	30	21-40	Others	I	T1	N0	M0	Localized	Yes	No/Unknown	Alive	54	Alive
4104457	2012	49	41-60	White	I	T1	N0	M0	Localized	Yes	No/Unknown	Alive	51	Alive
4104638	2013	44	41-60	White	III	T2	N3	M0	Regional	Yes	No/Unknown	Alive	46	Alive
4104642	2013	30	21-40	White	II	T1	N1	M0	Distant	Yes	No/Unknown	Alive	47	Alive
4105299	2013	20	0-20	White	I	T1	N0	M0	Localized	Yes	No/Unknown	Alive	47	Alive
4105417	2012	29	21-40	Others	I	T1	N0	M0	Localized	Yes	Yes	Alive	50	Alive
4105645	2012	36	21-40	White	I	T1	N0	M0	Localized	Yes	No/Unknown	Alive	49	Alive
4105900	2013	23	21-40	White	I	T1	N0	M0	Localized	Yes	No/Unknown	Alive	12	Alive
4106548	2013	58	41-60	White	I	T1	N0	M0	Localized	Yes	No/Unknown	Alive	0	Alive
4106636	2013	50	41-60	White	I	T1	N0	M0	Localized	Yes	No/Unknown	Alive	47	Alive
4106726	2013	44	41-60	White	I	T2	N0	M0	Localized	Yes	No/Unknown	Alive	46	Alive
4106893	2013	29	21-40	White	I	T1	N0	M0	Localized	Yes	No/Unknown	Alive	46	Alive
4107041	2012	24	21-40	White	I	T2	N0	M0	Localized	Yes	No/Unknown	Alive	53	Alive
4107155	2013	41	41-60	White	I	T2	N0	M0	Localized	Yes	No/Unknown	Alive	47	Alive
4107253	2012	37	21-40	Others	I	T1	N0	M0	Localized	Yes	No/Unknown	Alive	51	Alive
4107306	2013	38	21-40	White	I	T1	N0	M0	Localized	Yes	No/Unknown	Alive	47	Alive
4107670	2013	20	0-20	White	I	T1	N0	M0	Localized	Yes	No/Unknown	Alive	46	Alive
4108362	2013	30	21-40	Others	I	T1	N0	M0	Localized	Yes	No/Unknown	Alive	46	Alive
4108981	2013	28	21-40	White	I	T1	N0	M0	Localized	Yes	No/Unknown	Alive	46	Alive
4109147	2013	19	0-20	Others	I	T1	N0	M0	Localized	Yes	No/Unknown	Alive	46	Alive
4109239	2013	30	21-40	White	I	T1	N0	M0	Localized	Yes	No/Unknown	Alive	45	Alive
4110399	2013	27	21-40	White	I	T1	N0	M0	Localized	Yes	No/Unknown	Alive	47	Alive
4111347	2013	41	41-60	White	I	T1	N0	M0	Localized	Yes	No/Unknown	Alive	45	Alive
4111356	2013	33	21-40	White	I	T1	N0	M0	Localized	Yes	No/Unknown	Alive	43	Alive
4111459	2013	46	41-60	White	I	T1	N0	M0	Localized	Yes	No/Unknown	Alive	47	Alive
4111601	2012	29	21-40	White	I	T1	N0	M0	Localized	Yes	No/Unknown	Alive	51	Alive
4112421	2013	26	21-40	White	II	T2	N1	M0	Regional	Yes	No/Unknown	Alive	44	Alive
4114225	2013	47	41-60	White	I	T1	N0	M0	Localized	Yes	No/Unknown	Alive	44	Alive
4114930	2013	26	21-40	Others	I	T3	N0	M0	Regional	Yes	No/Unknown	Alive	45	Alive
4114942	2013	31	21-40	White	I	T1	N0	M0	Localized	Yes	No/Unknown	Alive	46	Alive
4115691	2013	20	0-20	White	I	T2	N0	M0	Localized	Yes	No/Unknown	Alive	43	Alive
4116108	2013	28	21-40	White	II	T2	N1	M0	Regional	Yes	No/Unknown	Alive	43	Alive
4116398	2013	43	41-60	Others	I	T1	N0	M0	Localized	Yes	No/Unknown	Alive	45	Alive
4116459	2013	48	41-60	Others	I	T2	N0	M0	Localized	Yes	No/Unknown	Alive	43	Alive
4117163	2013	29	21-40	White	I	T1	N0	M0	Localized	Yes	No/Unknown	Alive	42	Alive
4117871	2013	20	0-20	White	I	T1	N0	M0	Localized	Yes	No/Unknown	Alive	18	Alive
4118312	2013	48	41-60	White	I	T2	N0	M0	Localized	Yes	Yes	Alive	31	Alive
4118329	2013	58	41-60	Black	I	T1	N0	M0	Localized	Yes	No/Unknown	Alive	43	Alive
4118621	2013	55	41-60	White	I	T1	N0	M0	Localized	Yes	No/Unknown	Alive	42	Alive
4118642	2013	38	21-40	White	II	T2	N1	M0	Regional	Yes	Yes	Alive	43	Alive
4118951	2013	58	41-60	White	I	T1	N0	M0	Localized	Yes	Yes	Alive	43	Alive
4119283	2013	54	41-60	White	I	T1	N0	M0	Localized	Yes	No/Unknown	Alive	41	Alive
4119864	2013	18	0-20	Others	I	T1	N0	M0	Localized	Yes	No/Unknown	Alive	42	Alive
4120032	2013	18	0-20	White	I	T1	N0	M0	Localized	Yes	No/Unknown	Alive	41	Alive
4120046	2013	31	21-40	White	II	T2	N1	M0	Regional	Yes	No/Unknown	Alive	30	Alive
4120204	2013	34	21-40	White	I	T1	N0	M0	Localized	Yes	No/Unknown	Alive	42	Alive
4120874	2013	25	21-40	White	I	T3	N0	M0	Regional	Yes	No/Unknown	Alive	43	Alive
4121108	2013	31	21-40	White	II	T2	N2	M0	Regional	Yes	No/Unknown	Alive	42	Alive
4121589	2013	54	41-60	White	II	T1	N2	M0	Regional	Yes	No/Unknown	Alive	43	Alive
4121818	2013	21	21-40	White	III	T3	N0	M1	Distant	Yes	No/Unknown	Alive	9	Alive
4122428	2013	30	21-40	White	I	T2	N0	M0	Localized	Yes	No/Unknown	Alive	35	Alive
4122712	2013	71	>60	White	I	T1	N0	M0	Localized	Yes	Yes	Alive	41	Alive
4123317	2013	26	21-40	White	I	T1	N0	M0	Localized	Yes	No/Unknown	Alive	41	Alive
4123780	2013	32	21-40	White	I	T2	N0	M0	Localized	Yes	No/Unknown	Alive	43	Alive
4124297	2013	58	41-60	White	II	T2	N1	M0	Regional	Yes	No/Unknown	Alive	44	Alive
4124652	2013	32	21-40	White	I	T1	N0	M0	Localized	Yes	No/Unknown	Alive	47	Alive
4124729	2012	54	41-60	White	I	T2	N0	M0	Localized	Yes	No/Unknown	Alive	55	Alive
4124776	2012	36	21-40	White	I	T1	N0	M0	Localized	Yes	No/Unknown	Alive	53	Alive
4124961	2012	26	21-40	White	I	T1	N0	M0	Localized	Yes	No/Unknown	Alive	55	Alive
4125667	2013	30	21-40	White	I	T1	N0	M0	Localized	Yes	No/Unknown	Alive	41	Alive
4126033	2013	27	21-40	White	I	T1	N0	M0	Localized	Yes	Yes	Alive	36	Alive
4126107	2013	39	21-40	White	I	T1	N0	M0	Localized	Yes	No/Unknown	Alive	39	Alive
4126417	2012	50	41-60	White	I	T1	N0	M0	Localized	Yes	No/Unknown	Alive	53	Alive
4126685	2013	55	41-60	White	I	T2	N0	M0	Localized	Yes	No/Unknown	Alive	40	Alive
4127179	2013	33	21-40	White	I	T2	N0	M0	Localized	Yes	No/Unknown	Alive	40	Alive
4127488	2013	35	21-40	White	I	T1	N0	M0	Localized	Yes	No/Unknown	Alive	42	Alive
4127699	2012	42	41-60	White	I	T1	N0	M0	Localized	Yes	No/Unknown	Alive	53	Alive
4128916	2013	25	21-40	White	I	T1	N0	M0	Localized	Yes	No/Unknown	Alive	39	Alive
4129411	2013	34	21-40	White	I	T2	N0	M0	Localized	Yes	No/Unknown	Alive	40	Alive
4129600	2013	48	41-60	Others	I	T1	N0	M0	Localized	Yes	No/Unknown	Alive	40	Alive
4129652	2013	26	21-40	White	I	T1	N0	M0	Localized	Yes	No/Unknown	Alive	39	Alive
4129756	2013	41	41-60	White	II	T1	N1	M0	Regional	Yes	Yes	Alive	44	Alive
4130071	2013	33	21-40	White	I	T1	N0	M0	Localized	Yes	No/Unknown	Alive	6	Alive
4130113	2013	70	>60	White	I	T1	N0	M0	Localized	Yes	No/Unknown	Alive	39	Alive
4130493	2013	48	41-60	White	I	T2	N0	M0	Localized	Yes	No/Unknown	Alive	40	Alive
4130562	2013	39	21-40	White	I	T1	N0	M0	Localized	Yes	No/Unknown	Alive	38	Alive
4130733	2013	18	0-20	White	III	T3	N1	M1	Distant	Yes	No/Unknown	Alive	39	Alive
4130959	2013	29	21-40	White	I	T1	N0	M0	Localized	Yes	No/Unknown	Alive	41	Alive
4131038	2013	24	21-40	White	I	T1	N0	M0	Localized	Yes	No/Unknown	Alive	38	Alive
4131286	2013	38	21-40	White	I	T1	N0	M0	Localized	Yes	No/Unknown	Alive	46	Alive
4131905	2013	46	41-60	White	II	T1	N1	M0	Regional	Yes	Yes	Alive	39	Alive
4132323	2013	28	21-40	White	I	T1	N0	M0	Localized	Yes	No/Unknown	Alive	41	Alive
4133916	2013	25	21-40	White	I	T1	N0	M0	Localized	Yes	No/Unknown	Alive	42	Alive
4134151	2013	23	21-40	White	II	T1	N1	M0	Regional	Yes	No/Unknown	Alive	37	Alive
4134359	2013	32	21-40	Others	I	T1	N0	M0	Localized	Yes	No/Unknown	Alive	15	Alive
4134626	2013	28	21-40	White	I	T1	N0	M0	Localized	Yes	No/Unknown	Alive	39	Alive
4134836	2013	36	21-40	White	III	T2	N1	M1	Distant	Yes	No/Unknown	Alive	38	Alive
4135269	2013	31	21-40	White	I	T2	N0	M0	Localized	Yes	Yes	Alive	38	Alive
4135363	2013	32	21-40	White	I	T1	N0	M0	Localized	Yes	No/Unknown	Alive	44	Alive
4135560	2013	23	21-40	White	I	T2	N0	M0	Localized	Yes	No/Unknown	Alive	15	Alive
4135685	2013	27	21-40	Others	I	T1	N0	M0	Localized	Yes	No/Unknown	Alive	39	Alive
4135778	2013	21	21-40	White	II	T2	N2	M0	Regional	Yes	No/Unknown	Alive	39	Alive
4135854	2013	21	21-40	White	I	T1	N0	M0	Localized	Yes	No/Unknown	Alive	38	Alive
4135973	2013	26	21-40	White	I	T1	N0	M0	Localized	Yes	No/Unknown	Alive	38	Alive
4136510	2013	32	21-40	Others	I	T1	N0	M0	Localized	Yes	No/Unknown	Alive	38	Alive
4136515	2013	42	41-60	White	I	T2	N0	M0	Localized	Yes	No/Unknown	Alive	38	Alive
4136608	2013	45	41-60	White	I	T1	N0	M0	Localized	Yes	Yes	Alive	36	Alive
4136831	2013	64	>60	White	I	T1	N0	M0	Localized	Yes	No/Unknown	Alive	42	Alive
4136840	2013	0	0-20	White	I	T1	N0	M0	Localized	Yes	No/Unknown	Alive	6	Alive
4137169	2013	50	41-60	Others	I	T1	N0	M0	Localized	Yes	No/Unknown	Alive	37	Alive
4137200	2013	40	21-40	Black	I	T1	N0	M0	Localized	Yes	No/Unknown	Alive	38	Alive
4137572	2013	50	41-60	Others	I	T2	N0	M0	Localized	Yes	No/Unknown	Alive	40	Alive
4533819	2013	44	41-60	White	I	T1	N0	M0	Localized	Yes	No/Unknown	Alive	23	Alive
4533822	2013	30	21-40	Others	I	T2	N0	M0	Localized	Yes	Yes	Alive	34	Alive
4534240	2013	64	>60	White	III	T3	N1	M1	Distant	Yes	No/Unknown	Testis	31	Dead
4534248	2013	29	21-40	White	I	T2	N0	M0	Localized	Yes	No/Unknown	Alive	35	Alive
4534377	2013	29	21-40	Others	I	T1	N0	M0	Localized	Yes	No/Unknown	Alive	38	Alive
4534736	2013	24	21-40	White	I	T1	N0	M0	Localized	Yes	No/Unknown	Alive	38	Alive
4535029	2013	24	21-40	White	III	T1	N3	M1	Distant	Yes	No/Unknown	Alive	37	Alive
4535386	2013	28	21-40	White	I	T1	N0	M0	Localized	Yes	No/Unknown	Alive	37	Alive
4535610	2013	18	0-20	White	I	T1	N0	M0	Localized	Yes	No/Unknown	Alive	37	Alive
4535617	2013	21	21-40	White	I	T1	N0	M0	Localized	Yes	No/Unknown	Alive	35	Alive
4535917	2013	36	21-40	White	I	T1	N0	M0	Localized	Yes	No/Unknown	Alive	37	Alive
4536050	2013	35	21-40	Others	I	T1	N0	M0	Localized	Yes	No/Unknown	Alive	37	Alive
4536090	2013	34	21-40	White	I	T2	N0	M0	Localized	Yes	No/Unknown	Alive	37	Alive
4536621	2013	44	41-60	White	II	T1	N1	M0	Regional	Yes	No/Unknown	Alive	38	Alive
4536643	2013	47	41-60	White	I	T1	N0	M0	Localized	Yes	No/Unknown	Alive	38	Alive
4536708	2013	25	21-40	White	I	T1	N0	M0	Localized	Yes	No/Unknown	Alive	39	Alive
4537020	2013	29	21-40	White	I	T2	N0	M0	Localized	Yes	No/Unknown	Alive	37	Alive
4537072	2014	55	41-60	White	I	T2	N0	M0	Localized	Yes	No/Unknown	Accidents and Adverse Effects	29	Dead
4537119	2013	29	21-40	White	III	T1	N1	M1	Distant	Yes	No/Unknown	Alive	36	Alive
4537224	2014	52	41-60	White	I	T1	N0	M0	Localized	Yes	No/Unknown	Alive	34	Alive
4537449	2013	24	21-40	White	I	T2	N0	M0	Localized	Yes	No/Unknown	Alive	35	Alive
4537531	2013	32	21-40	White	I	T1	N0	M0	Localized	Yes	No/Unknown	Alive	36	Alive
4537769	2013	38	21-40	White	I	T1	N0	M0	Localized	Yes	No/Unknown	Alive	37	Alive
4537841	2013	38	21-40	White	I	T1	N0	M0	Localized	Yes	No/Unknown	Alive	20	Alive
4537939	2013	24	21-40	White	I	T1	N0	M0	Localized	Yes	No/Unknown	Alive	22	Alive
4538022	2013	36	21-40	White	I	T1	N0	M0	Localized	Yes	No/Unknown	Alive	36	Alive
4538320	2013	52	41-60	White	I	T1	N0	M0	Localized	Yes	No/Unknown	Alive	36	Alive
4539607	2013	27	21-40	White	I	T1	N0	M0	Localized	Yes	No/Unknown	Alive	18	Alive
4539702	2014	43	41-60	White	II	T2	N1	M0	Regional	Yes	No/Unknown	Alive	35	Alive
4539913	2014	29	21-40	White	I	T2	N0	M0	Localized	Yes	No/Unknown	Alive	35	Alive
4540172	2014	35	21-40	White	I	T1	N0	M0	Localized	Yes	No/Unknown	Alive	35	Alive
4540308	2013	47	41-60	White	I	T1	N0	M0	Localized	Yes	No/Unknown	Alive	7	Alive
4540533	2014	35	21-40	White	I	T1	N0	M0	Localized	Yes	No/Unknown	Alive	35	Alive
4540615	2013	63	>60	White	III	T1	N1	M1	Distant	Yes	No/Unknown	Alive	36	Alive
4540756	2014	32	21-40	White	I	T1	N0	M0	Localized	Yes	No/Unknown	Alive	35	Alive
4540896	2014	37	21-40	White	I	T1	N0	M0	Localized	Yes	No/Unknown	Alive	34	Alive
4541251	2014	28	21-40	White	I	T1	N0	M0	Localized	Yes	No/Unknown	Alive	35	Alive
4541303	2014	36	21-40	White	I	T1	N0	M0	Localized	Yes	No/Unknown	Alive	35	Alive
4541939	2014	33	21-40	White	I	T1	N0	M0	Localized	Yes	No/Unknown	Alive	34	Alive
4542048	2014	31	21-40	White	I	T1	N0	M0	Localized	Yes	No/Unknown	Alive	35	Alive
4542118	2014	36	21-40	White	I	T1	N0	M0	Localized	Yes	No/Unknown	Alive	34	Alive
4542285	2014	24	21-40	Others	I	T2	N0	M0	Localized	Yes	No/Unknown	Alive	35	Alive
4542583	2014	29	21-40	Others	I	T1	N0	M0	Localized	Yes	No/Unknown	Alive	34	Alive
4543018	2014	50	41-60	White	II	T1	N1	M0	Regional	Yes	Yes	Alive	34	Alive
4543248	2014	23	21-40	White	II	T2	N1	M0	Regional	Yes	No/Unknown	Alive	34	Alive
4543608	2010	30	21-40	White	I	T2	N0	M0	Localized	Yes	No/Unknown	Alive	57	Alive
4544327	2014	44	41-60	White	II	T2	N1	M0	Regional	Yes	Yes	Alive	35	Alive
4545241	2014	42	41-60	White	I	T1	N0	M0	Localized	Yes	Yes	Alive	32	Alive
4546085	2014	53	41-60	White	I	T1	N0	M0	Localized	Yes	No/Unknown	Alive	33	Alive
4546232	2014	35	21-40	White	I	T1	N0	M0	Localized	Yes	No/Unknown	Alive	19	Alive
4546676	2014	26	21-40	White	I	T1	N0	M0	Localized	Yes	No/Unknown	Alive	34	Alive
4546685	2014	56	41-60	White	I	T1	N0	M0	Localized	Yes	No/Unknown	Alive	33	Alive
4546860	2014	26	21-40	White	I	T1	N0	M0	Localized	Yes	No/Unknown	Alive	33	Alive
4546863	2014	33	21-40	White	III	T2	N0	M1	Distant	Yes	No/Unknown	Alive	33	Alive
4547160	2014	27	21-40	White	I	T1	N0	M0	Localized	Yes	No/Unknown	Alive	32	Alive
4547362	2014	25	21-40	White	I	T1	N0	M0	Localized	Yes	No/Unknown	Alive	23	Alive
4547443	2014	55	41-60	White	I	T1	N0	M0	Localized	Yes	Yes	Alive	34	Alive
4547550	2014	34	21-40	White	I	T1	N0	M0	Localized	Yes	No/Unknown	Alive	34	Alive
4548023	2014	45	41-60	Others	I	T2	N0	M0	Localized	Yes	No/Unknown	Alive	33	Alive
4548208	2014	57	41-60	White	I	T2	N0	M0	Localized	Yes	No/Unknown	Alive	34	Alive
4548332	2014	33	21-40	White	I	T2	N0	M0	Localized	Yes	No/Unknown	Alive	20	Alive
4548716	2014	42	41-60	White	I	T1	N0	M0	Localized	Yes	No/Unknown	Alive	32	Alive
4548864	2014	49	41-60	White	I	T1	N0	M0	Localized	Yes	No/Unknown	Alive	31	Alive
4549602	2014	31	21-40	White	I	T1	N0	M0	Localized	Yes	No/Unknown	Alive	33	Alive
4549700	2014	32	21-40	White	I	T1	N0	M0	Localized	Yes	No/Unknown	Alive	33	Alive
4551440	2014	73	>60	White	I	T1	N0	M0	Localized	Yes	No/Unknown	Alive	31	Alive
4551757	2014	27	21-40	White	I	T1	N0	M0	Localized	Yes	No/Unknown	Alive	31	Alive
4552767	2014	19	0-20	White	III	T3	N3	M1	Distant	Yes	No/Unknown	Alive	31	Alive
4553141	2014	38	21-40	White	II	T2	N1	M0	Regional	Yes	No/Unknown	Alive	32	Alive
4553399	2014	31	21-40	White	I	T1	N0	M0	Localized	Yes	No/Unknown	Alive	31	Alive
4553484	2014	29	21-40	White	I	T1	N0	M0	Localized	Yes	No/Unknown	Alive	32	Alive
4553919	2014	26	21-40	White	I	T1	N0	M0	Localized	Yes	No/Unknown	Alive	31	Alive
4554152	2014	32	21-40	White	I	T1	N0	M0	Localized	Yes	No/Unknown	Alive	33	Alive
4554161	2014	27	21-40	White	I	T1	N0	M0	Localized	Yes	No/Unknown	Alive	29	Alive
4554771	2014	50	41-60	White	I	T1	N0	M0	Localized	Yes	No/Unknown	Alive	31	Alive
4555097	2014	29	21-40	White	I	T1	N0	M0	Localized	Yes	No/Unknown	Alive	32	Alive
4555251	2014	16	0-20	Others	I	T1	N0	M0	Localized	Yes	No/Unknown	Alive	33	Alive
4555594	2014	28	21-40	White	I	T1	N0	M0	Localized	Yes	No/Unknown	Alive	30	Alive
4555959	2014	34	21-40	White	I	T2	N0	M0	Localized	Yes	No/Unknown	Alive	30	Alive
4556413	2014	23	21-40	White	I	T1	N0	M0	Localized	Yes	No/Unknown	Alive	31	Alive
4557169	2014	20	0-20	White	III	T2	N3	M1	Distant	Yes	No/Unknown	Alive	29	Alive
4557209	2014	28	21-40	White	I	T1	N0	M0	Localized	Yes	No/Unknown	Alive	30	Alive
4557475	2014	42	41-60	White	I	T2	N0	M0	Localized	Yes	Yes	Alive	29	Alive
4557515	2014	52	41-60	White	I	T2	N0	M0	Localized	Yes	No/Unknown	Alive	28	Alive
4557526	2014	30	21-40	White	I	T2	N0	M0	Localized	Yes	No/Unknown	Alive	28	Alive
4557765	2013	46	41-60	White	I	T1	N0	M0	Localized	Yes	No/Unknown	Alive	47	Alive
4557771	2013	28	21-40	White	I	T2	N0	M0	Localized	Yes	No/Unknown	Alive	3	Alive
4558501	2014	38	21-40	White	II	T1	N3	M0	Regional	Yes	No/Unknown	Alive	31	Alive
4558660	2014	38	21-40	White	I	T1	N0	M0	Localized	Yes	No/Unknown	Alive	30	Alive
4558689	2014	27	21-40	White	I	T1	N0	M0	Localized	Yes	No/Unknown	Alive	29	Alive
4558893	2014	32	21-40	Black	I	T1	N0	M0	Localized	Yes	No/Unknown	Alive	30	Alive
4558993	2014	25	21-40	White	I	T1	N0	M0	Localized	Yes	No/Unknown	Alive	29	Alive
4559189	2014	54	41-60	White	I	T2	N0	M0	Localized	Yes	Yes	Alive	21	Alive
4559244	2014	26	21-40	White	I	T1	N0	M0	Localized	Yes	No/Unknown	Alive	23	Alive
4559668	2014	18	0-20	White	III	T1	N1	M1	Distant	Yes	No/Unknown	Alive	17	Alive
4560026	2014	32	21-40	Others	I	T1	N0	M0	Localized	Yes	No/Unknown	Alive	29	Alive
4560442	2013	37	21-40	Others	I	T1	N0	M0	Localized	Yes	No/Unknown	Alive	44	Alive
4560463	2014	35	21-40	White	I	T1	N0	M0	Localized	Yes	No/Unknown	Alive	28	Alive
4560592	2014	58	41-60	White	I	T1	N0	M0	Localized	Yes	No/Unknown	Alive	29	Alive
4560677	2014	18	0-20	White	III	T1	N1	M1	Distant	Yes	No/Unknown	Alive	29	Alive
4561625	2014	29	21-40	White	I	T1	N0	M0	Localized	Yes	No/Unknown	Alive	29	Alive
4561977	2014	25	21-40	White	I	T1	N0	M0	Localized	Yes	No/Unknown	Alive	27	Alive
4562361	2014	29	21-40	White	I	T1	N0	M0	Localized	Yes	No/Unknown	Alive	27	Alive
4562783	2014	37	21-40	Others	I	T1	N0	M0	Localized	Yes	No/Unknown	Alive	30	Alive
4563359	2013	39	21-40	White	I	T1	N0	M0	Localized	Yes	No/Unknown	Alive	38	Alive
4563861	2014	40	21-40	Others	I	T2	N0	M0	Localized	Yes	No/Unknown	Alive	28	Alive
4564201	2014	28	21-40	White	I	T2	N0	M0	Localized	Yes	No/Unknown	Alive	29	Alive
4564845	2014	26	21-40	White	I	T1	N0	M0	Localized	Yes	No/Unknown	Alive	28	Alive
4565638	2014	27	21-40	Others	I	T1	N0	M0	Localized	Yes	No/Unknown	Alive	28	Alive
4565703	2014	28	21-40	Others	II	T1	N1	M0	Regional	Yes	Yes	Alive	25	Alive
4565909	2014	24	21-40	White	I	T1	N0	M0	Localized	Yes	No/Unknown	Alive	28	Alive
4565928	2014	48	41-60	White	II	T1	N2	M0	Regional	Yes	No/Unknown	Alive	26	Alive
4566442	2014	29	21-40	White	I	T1	N0	M0	Localized	Yes	No/Unknown	Alive	26	Alive
4566884	2014	26	21-40	White	I	T1	N0	M0	Localized	Yes	No/Unknown	Alive	29	Alive
4567513	2014	29	21-40	White	II	T1	N1	M0	Regional	Yes	Yes	Alive	26	Alive
4568011	2014	28	21-40	Others	I	T1	N0	M0	Localized	Yes	No/Unknown	Alive	27	Alive
4568069	2013	54	41-60	Others	I	T1	N0	M0	Localized	Yes	No/Unknown	Alive	42	Alive
4568749	2014	43	41-60	White	II	T1	N1	M0	Regional	Yes	No/Unknown	Alive	28	Alive
4568867	2014	36	21-40	Others	I	T1	N0	M0	Localized	Yes	No/Unknown	Alive	27	Alive
4569007	2014	32	21-40	White	III	T1	N3	M0	Regional	Yes	No/Unknown	Alive	4	Alive
4569292	2014	26	21-40	White	I	T1	N0	M0	Localized	Yes	No/Unknown	Alive	34	Alive
4569437	2014	42	41-60	Others	I	T1	N0	M0	Localized	Yes	No/Unknown	Alive	27	Alive
4569673	2014	62	>60	White	I	T1	N0	M0	Localized	Yes	No/Unknown	Diseases of Heart	10	Dead
4570067	2013	38	21-40	White	I	T1	N0	M0	Localized	Yes	No/Unknown	Alive	37	Alive
4570251	2013	34	21-40	Others	I	T1	N0	M0	Localized	Yes	No/Unknown	Alive	45	Alive
4570406	2014	57	41-60	Others	I	T2	N0	M0	Localized	Yes	No/Unknown	Alive	25	Alive
4570429	2014	23	21-40	White	I	T2	N0	M0	Localized	Yes	No/Unknown	Alive	26	Alive
4570752	2014	28	21-40	White	I	T1	N0	M0	Localized	Yes	No/Unknown	Alive	26	Alive
4570962	2014	20	0-20	White	I	T1	N0	M0	Localized	Yes	No/Unknown	Alive	26	Alive
4571382	2014	31	21-40	White	I	T1	N0	M0	Localized	Yes	No/Unknown	Alive	17	Alive
4572036	2014	30	21-40	White	I	T1	N0	M0	Localized	Yes	No/Unknown	Alive	24	Alive
4572115	2014	39	21-40	White	III	T1	N3	M1	Distant	Yes	No/Unknown	Alive	25	Alive
4572337	2014	43	41-60	White	I	T1	N0	M0	Regional	Yes	No/Unknown	Alive	25	Alive
4573038	2013	24	21-40	Others	I	T1	N0	M0	Localized	Yes	No/Unknown	Alive	44	Alive
4573113	2014	25	21-40	White	I	T1	N0	M0	Localized	Yes	No/Unknown	Alive	24	Alive
4573334	2014	37	21-40	White	II	T2	N1	M0	Regional	Yes	No/Unknown	Alive	26	Alive
4573632	2014	45	41-60	White	I	T2	N0	M0	Localized	Yes	No/Unknown	Alive	20	Alive
4573966	2013	28	21-40	White	I	T1	N0	M0	Localized	Yes	No/Unknown	Alive	4	Alive
4574200	2014	19	0-20	Others	I	T1	N0	M0	Localized	Yes	No/Unknown	Alive	24	Alive
4574515	2013	27	21-40	White	III	T2	N3	M1	Regional	Yes	No/Unknown	Alive	41	Alive
4574776	2014	19	0-20	White	I	T1	N0	M0	Localized	Yes	No/Unknown	Alive	22	Alive
4575004	2014	26	21-40	White	I	T2	N0	M0	Localized	Yes	No/Unknown	Alive	24	Alive
4575166	2014	23	21-40	White	III	T2	N2	M0	Regional	Yes	No/Unknown	Alive	17	Alive
4575432	2013	20	0-20	White	I	T1	N0	M0	Localized	Yes	No/Unknown	Alive	36	Alive
4575588	2014	38	21-40	White	I	T1	N0	M0	Localized	Yes	No/Unknown	Alive	24	Alive
4575647	2014	44	41-60	White	I	T1	N0	M0	Localized	Yes	Yes	Alive	25	Alive
4575884	2014	23	21-40	White	I	T2	N0	M0	Regional	Yes	No/Unknown	Alive	12	Alive
4576421	2015	49	41-60	White	I	T1	N0	M0	Localized	Yes	No/Unknown	Alive	23	Alive
4576690	2014	36	21-40	White	I	T1	N0	M0	Localized	Yes	No/Unknown	Alive	25	Alive
4577098	2014	41	41-60	White	I	T2	N0	M0	Localized	Yes	No/Unknown	Alive	24	Alive
4577919	2014	25	21-40	White	I	T1	N0	M0	Localized	Yes	No/Unknown	Alive	23	Alive
4577955	2015	62	>60	White	I	T1	N0	M0	Localized	Yes	No/Unknown	Alive	23	Alive
4578703	2015	22	21-40	Others	III	T2	N1	M0	Regional	Yes	No/Unknown	Alive	23	Alive
4579781	2015	24	21-40	White	I	T2	N0	M0	Localized	Yes	No/Unknown	Alive	23	Alive
4580097	2015	33	21-40	Others	II	T1	N1	M0	Regional	Yes	Yes	Alive	22	Alive
4580186	2015	51	41-60	White	I	T2	N0	M0	Localized	Yes	No/Unknown	Alive	23	Alive
4580552	2012	30	21-40	Others	I	T1	N0	M0	Localized	Yes	No/Unknown	Alive	58	Alive
4580974	2015	42	41-60	White	I	T1	N0	M0	Localized	Yes	No/Unknown	Alive	21	Alive
4581179	2015	29	21-40	White	I	T2	N0	M0	Localized	Yes	No/Unknown	Alive	22	Alive
4581502	2015	25	21-40	White	II	T1	N1	M0	Regional	Yes	No/Unknown	Alive	17	Alive
4581553	2015	31	21-40	White	I	T1	N0	M0	Localized	Yes	No/Unknown	Alive	21	Alive
4581976	2015	26	21-40	White	I	T2	N0	M0	Localized	Yes	No/Unknown	Alive	22	Alive
4582124	2015	20	0-20	White	I	T2	N0	M0	Localized	Yes	No/Unknown	Alive	21	Alive
4582608	2015	24	21-40	White	I	T1	N0	M0	Localized	Yes	No/Unknown	Alive	14	Alive
4582699	2015	26	21-40	White	II	T1	N3	M0	Regional	Yes	No/Unknown	Alive	22	Alive
4584019	2014	39	21-40	White	III	T3	N3	M0	Regional	Yes	No/Unknown	Alive	34	Alive
4584178	2015	52	41-60	White	I	T2	N0	M0	Localized	Yes	No/Unknown	Alive	21	Alive
4584265	2015	41	41-60	White	I	T1	N0	M0	Localized	Yes	No/Unknown	Alive	21	Alive
4584289	2015	40	21-40	White	I	T1	N0	M0	Localized	Yes	No/Unknown	Alive	21	Alive
4584427	2015	43	41-60	White	I	T1	N0	M0	Localized	Yes	No/Unknown	Alive	21	Alive
4584882	2015	30	21-40	White	I	T1	N0	M0	Localized	Yes	No/Unknown	Alive	2	Alive
4584999	2015	62	>60	White	III	T1	N1	M1	Distant	Yes	No/Unknown	Alive	22	Alive
4585740	2015	49	41-60	White	I	T1	N0	M0	Localized	Yes	No/Unknown	Alive	17	Alive
4586466	2015	37	21-40	White	I	T1	N0	M0	Localized	Yes	No/Unknown	Alive	21	Alive
4587067	2015	58	41-60	White	I	T1	N0	M0	Localized	Yes	No/Unknown	Alive	20	Alive
4587288	2015	47	41-60	White	I	T1	N0	M0	Localized	Yes	No/Unknown	Alive	21	Alive
4587305	2015	34	21-40	Others	I	T2	N0	M0	Localized	Yes	No/Unknown	Alive	21	Alive
4588376	2015	40	21-40	White	I	T1	N0	M0	Localized	Yes	No/Unknown	Alive	22	Alive
4588660	2015	39	21-40	White	I	T2	N0	M0	Localized	Yes	No/Unknown	Alive	19	Alive
4588785	2015	32	21-40	White	I	T1	N0	M0	Localized	Yes	No/Unknown	Alive	18	Alive
4588850	2015	33	21-40	White	I	T1	N0	M0	Localized	Yes	No/Unknown	Alive	19	Alive
4589106	2015	38	21-40	Black	I	T1	N0	M0	Localized	Yes	No/Unknown	Alive	19	Alive
4589465	2014	52	41-60	White	I	T2	N0	M0	Regional	Yes	No/Unknown	Alive	26	Alive
4589509	2015	19	0-20	White	I	T2	N0	M0	Localized	Yes	No/Unknown	Alive	18	Alive
4589826	2015	28	21-40	White	I	T1	N0	M0	Localized	Yes	No/Unknown	Alive	20	Alive
4589844	2015	41	41-60	White	II	T1	N1	M0	Regional	Yes	No/Unknown	Alive	21	Alive
4590471	2015	29	21-40	White	I	T2	N0	M0	Localized	Yes	No/Unknown	Alive	20	Alive
4590492	2015	25	21-40	White	III	T2	N1	M1	Distant	Yes	No/Unknown	Alive	20	Alive
4591438	2015	58	41-60	White	I	T1	N0	M0	Localized	Yes	No/Unknown	Alive	22	Alive
4592607	2015	36	21-40	White	I	T1	N0	M0	Localized	Yes	No/Unknown	Alive	0	Alive
4593305	2015	41	41-60	White	I	T1	N0	M0	Localized	Yes	No/Unknown	Alive	5	Alive
4593713	2015	54	41-60	White	II	T2	N1	M0	Regional	Yes	Yes	Alive	19	Alive
4594803	2015	34	21-40	Others	I	T1	N0	M0	Localized	Yes	No/Unknown	Alive	18	Alive
4595064	2015	47	41-60	White	I	T1	N0	M0	Localized	Yes	No/Unknown	Alive	18	Alive
4596256	2015	27	21-40	White	I	T1	N0	M0	Localized	Yes	No/Unknown	Alive	5	Alive
4596322	2015	19	0-20	White	I	T1	N0	M0	Localized	Yes	No/Unknown	Alive	17	Alive
4596919	2015	23	21-40	Others	I	T1	N0	M0	Localized	Yes	No/Unknown	Alive	17	Alive
4597133	2014	23	21-40	White	I	T1	N0	M0	Localized	Yes	No/Unknown	Alive	25	Alive
4598182	2015	27	21-40	White	I	T2	N0	M0	Localized	Yes	No/Unknown	Alive	20	Alive
4598221	2015	20	0-20	White	I	T1	N0	M0	Localized	Yes	No/Unknown	Alive	20	Alive
4598494	2015	40	21-40	White	II	T1	N1	M0	Regional	Yes	No/Unknown	Alive	19	Alive
4598557	2015	42	41-60	White	I	T1	N0	M0	Localized	Yes	No/Unknown	Alive	17	Alive
4598684	2015	23	21-40	White	I	T1	N0	M0	Localized	Yes	No/Unknown	Alive	16	Alive
4598759	2014	18	0-20	White	I	T2	N0	M0	Localized	Yes	No/Unknown	Alive	13	Alive
4598897	2015	50	41-60	White	III	T2	N3	M0	Regional	Yes	No/Unknown	Testis	16	Dead
4600090	2015	49	41-60	White	II	T1	N2	M0	Regional	Yes	No/Unknown	Alive	5	Alive
4600190	2015	69	>60	White	I	T1	N0	M0	Regional	Yes	No/Unknown	Other Cause of Death	4	Dead
4600284	2015	52	41-60	White	III	T1	N1	M1	Distant	Yes	No/Unknown	Alive	17	Alive
4600369	2015	27	21-40	White	I	T1	N0	M0	Localized	Yes	No/Unknown	Alive	16	Alive
4600592	2015	33	21-40	White	I	T1	N0	M0	Localized	Yes	No/Unknown	Alive	17	Alive
4601147	2014	30	21-40	White	I	T1	N0	M0	Localized	Yes	No/Unknown	Alive	15	Alive
4601244	2015	27	21-40	White	I	T1	N0	M0	Localized	Yes	No/Unknown	Alive	16	Alive
4602207	2015	61	>60	White	I	T1	N0	M0	Localized	Yes	No/Unknown	Alive	16	Alive
4602259	2015	53	41-60	White	I	T1	N0	M0	Localized	Yes	No/Unknown	Alive	17	Alive
4603372	2015	25	21-40	Others	III	T1	N1	M1	Distant	Yes	No/Unknown	Alive	20	Alive
4604199	2015	44	41-60	White	I	T1	N0	M0	Localized	Yes	No/Unknown	Alive	14	Alive
4604236	2015	58	41-60	White	I	T1	N0	M0	Localized	Yes	No/Unknown	Alive	15	Alive
4604288	2015	24	21-40	White	II	T1	N1	M0	Regional	Yes	No/Unknown	Alive	5	Alive
4604562	2015	49	41-60	White	I	T2	N0	M0	Localized	Yes	No/Unknown	Alive	16	Alive
4606986	2015	38	21-40	White	I	T1	N0	M0	Localized	Yes	No/Unknown	Alive	15	Alive
4607272	2015	25	21-40	White	I	T1	N0	M0	Localized	Yes	No/Unknown	Alive	16	Alive
4607888	2015	26	21-40	White	I	T2	N0	M0	Localized	Yes	No/Unknown	Alive	16	Alive
4608649	2015	37	21-40	White	I	T1	N0	M0	Localized	Yes	No/Unknown	Alive	15	Alive
4608662	2015	52	41-60	White	III	T2	N1	M1	Distant	Yes	No/Unknown	Alive	16	Alive
4608713	2015	34	21-40	White	I	T1	N0	M0	Localized	Yes	No/Unknown	Alive	13	Alive
4608827	2015	23	21-40	Others	I	T1	N0	M0	Localized	Yes	No/Unknown	Alive	20	Alive
4609581	2015	31	21-40	White	II	T1	N1	M0	Regional	Yes	Yes	Alive	19	Alive
4610425	2015	68	>60	White	I	T1	N0	M0	Localized	Yes	No/Unknown	Alive	13	Alive
4610823	2015	22	21-40	White	II	T2	N2	M0	Regional	Yes	No/Unknown	Alive	15	Alive
4611125	2014	24	21-40	Others	I	T1	N0	M0	Localized	Yes	No/Unknown	Alive	24	Alive
4611460	2014	21	21-40	White	I	T1	N0	M0	Localized	Yes	No/Unknown	Alive	26	Alive
4611664	2015	34	21-40	White	II	T2	N2	M0	Regional	Yes	No/Unknown	Alive	14	Alive
4611682	2015	32	21-40	White	II	T2	N1	M0	Regional	Yes	No/Unknown	Alive	14	Alive
4612003	2015	37	21-40	White	I	T1	N0	M0	Localized	Yes	No/Unknown	Alive	14	Alive
4612336	2015	19	0-20	White	I	T2	N0	M0	Localized	Yes	No/Unknown	Alive	14	Alive
4612528	2015	26	21-40	White	I	T1	N0	M0	Localized	Yes	No/Unknown	Alive	15	Alive
4612662	2015	29	21-40	Others	I	T2	N0	M0	Localized	Yes	No/Unknown	Alive	12	Alive
4612931	2015	31	21-40	White	I	T1	N0	M0	Localized	Yes	No/Unknown	Alive	13	Alive
4613877	2015	48	41-60	White	I	T2	N0	M0	Localized	Yes	No/Unknown	Alive	12	Alive
4613917	2015	34	21-40	White	I	T1	N0	M0	Localized	Yes	No/Unknown	Alive	2	Alive
4614461	2015	31	21-40	White	I	T1	N0	M0	Localized	Yes	No/Unknown	Alive	12	Alive
4614928	2015	23	21-40	White	III	T1	N3	M1	Regional	Yes	No/Unknown	Alive	12	Alive
4615040	2015	22	21-40	Others	I	T1	N0	M0	Localized	Yes	No/Unknown	Alive	12	Alive
4615085	2015	35	21-40	White	I	T1	N0	M0	Localized	Yes	No/Unknown	Alive	12	Alive
4615109	2015	21	21-40	Others	II	T2	N1	M0	Regional	Yes	No/Unknown	Alive	14	Alive
4615160	2015	35	21-40	White	I	T1	N0	M0	Localized	Yes	No/Unknown	Alive	11	Alive
4615498	2015	19	0-20	Others	III	T2	N2	M1	Distant	Yes	No/Unknown	Alive	12	Alive
4615525	2015	19	0-20	White	I	T2	N0	M0	Localized	Yes	No/Unknown	Alive	14	Alive
4615680	2015	34	21-40	White	I	T1	N0	M0	Localized	Yes	No/Unknown	Alive	13	Alive
4616633	2015	62	>60	White	I	T1	N0	M0	Localized	Yes	No/Unknown	Alive	15	Alive
4618204	2014	77	>60	White	I	T1	N0	M0	Localized	Yes	No/Unknown	Alive	32	Alive
4618648	2015	37	21-40	White	I	T1	N0	M0	Localized	Yes	No/Unknown	Alive	14	Alive
4619006	2015	31	21-40	Others	I	T1	N0	M0	Localized	Yes	No/Unknown	Alive	12	Alive
4619402	2014	50	41-60	White	I	T1	N0	M0	Localized	Yes	No/Unknown	Alive	28	Alive
4619419	2015	36	21-40	White	I	T1	N0	M0	Localized	Yes	No/Unknown	Alive	13	Alive
4619723	2015	34	21-40	Black	I	T1	N0	M0	Localized	Yes	No/Unknown	Alive	13	Alive
4619935	2014	52	41-60	White	I	T1	N0	M0	Localized	Yes	No/Unknown	Alive	27	Alive
4619986	2015	21	21-40	White	II	T2	N1	M0	Regional	Yes	No/Unknown	Alive	14	Alive
4620098	2014	65	>60	White	I	T1	N0	M0	Localized	Yes	No/Unknown	Alive	34	Alive
4620263	2015	32	21-40	White	I	T1	N0	M0	Localized	Yes	No/Unknown	Alive	13	Alive
4621277	2015	19	0-20	White	II	T1	N1	M0	Regional	Yes	No/Unknown	Alive	12	Alive
4621279	2015	39	21-40	White	III	T2	N3	M1	Distant	Yes	No/Unknown	Alive	13	Alive
4636641	2014	28	21-40	White	I	T2	N0	M0	Localized	Yes	No/Unknown	Alive	31	Alive
4642170	2015	34	21-40	White	III	T1	N0	M1	Distant	Yes	No/Unknown	Testis	14	Dead
4645845	2015	31	21-40	Others	I	T2	N0	M0	Localized	Yes	No/Unknown	Alive	0	Alive
4645928	2015	26	21-40	White	II	T1	N2	M0	Regional	Yes	No/Unknown	Alive	14	Alive
4648251	2015	38	21-40	Others	I	T1	N0	M0	Localized	Yes	No/Unknown	Alive	20	Alive
4662327	2015	26	21-40	White	I	T2	N0	M0	Localized	Yes	No/Unknown	Alive	14	Alive
4665413	2015	31	21-40	White	I	T1	N0	M0	Localized	Yes	No/Unknown	Alive	13	Alive
4685515	2015	58	41-60	White	I	T2	N0	M0	Localized	Yes	No/Unknown	Alive	20	Alive
7966379	2004	45	41-60	White	I	T1	N0	M0	Localized	Yes	Yes	Alive	154	Alive
7967036	2004	40	21-40	White	I	T1	N0	M0	Localized	Yes	Yes	Alive	153	Alive
7967508	2004	38	21-40	White	I	T2	N0	M0	Localized	Yes	No/Unknown	Alive	142	Alive
7967825	2004	14	0-20	White	I	T1	N0	M0	Localized	Yes	No/Unknown	Alive	152	Alive
7967837	2004	22	21-40	White	I	T1	N0	M0	Localized	Yes	No/Unknown	Chronic Liver Disease and Cirrhosis	104	Dead
7968148	2004	35	21-40	White	I	T2	N0	M0	Localized	Yes	Yes	Alive	151	Alive
7968727	2004	37	21-40	White	I	T2	N0	M0	Localized	Yes	No/Unknown	Alive	146	Alive
7974377	2004	25	21-40	White	II	T1	N1	M0	Regional	Yes	No/Unknown	Alive	9	Alive
7974403	2004	44	41-60	White	I	T2	N0	M0	Localized	Yes	No/Unknown	Alive	147	Alive
8366763	2004	38	21-40	White	III	T1	N2	M0	Regional	Yes	No/Unknown	Alive	152	Alive
8367521	2004	26	21-40	White	I	T1	N0	M0	Localized	Yes	No/Unknown	Alive	155	Alive
8367678	2004	44	41-60	White	I	T2	N0	M0	Localized	Yes	Yes	Alive	149	Alive
8367760	2004	27	21-40	White	I	T2	N0	M0	Localized	Yes	Yes	Alive	146	Alive
8367924	2004	37	21-40	White	I	T1	N0	M0	Localized	Yes	No/Unknown	Alive	150	Alive
8368143	2004	18	0-20	White	II	T2	N2	M0	Regional	Yes	No/Unknown	Alive	150	Alive
8368380	2004	30	21-40	White	I	T2	N0	M0	Localized	Yes	No/Unknown	Alive	151	Alive
8368521	2004	45	41-60	White	I	T1	N0	M0	Localized	Yes	Yes	Alive	148	Alive
8368870	2004	31	21-40	White	I	T2	N0	M0	Localized	Yes	Yes	Alive	150	Alive
8369193	2004	29	21-40	White	I	T1	N0	M0	Localized	Yes	No/Unknown	Alive	149	Alive
8369259	2004	16	0-20	White	I	T1	N0	M0	Localized	Yes	No/Unknown	Alive	150	Alive
8369380	2004	28	21-40	White	III	T2	N1	M0	Regional	Yes	Yes	Alive	151	Alive
8369492	2004	40	21-40	White	I	T1	N0	M0	Localized	Yes	Yes	Alive	149	Alive
8370737	2004	20	0-20	Others	II	T2	N2	M0	Regional	Yes	No/Unknown	Alive	154	Alive
8371265	2004	36	21-40	White	I	T1	N0	M0	Localized	Yes	Yes	Alive	149	Alive
8371574	2004	34	21-40	White	I	T1	N0	M0	Localized	Yes	No/Unknown	Alive	155	Alive
8372283	2004	36	21-40	White	I	T1	N0	M0	Localized	Yes	Yes	Alive	145	Alive
8372805	2004	43	41-60	White	I	T1	N0	M0	Localized	Yes	Yes	Alive	150	Alive
8372971	2004	34	21-40	White	I	T1	N0	M0	Localized	Yes	Yes	Alive	151	Alive
8372987	2004	23	21-40	Others	I	T1	N0	M0	Localized	Yes	Yes	Alive	155	Alive
8373052	2004	41	41-60	White	I	T1	N0	M0	Localized	Yes	Yes	Alive	146	Alive
8373163	2004	33	21-40	White	I	T1	N0	M0	Localized	Yes	Yes	Alive	150	Alive
8373724	2004	42	41-60	White	I	T2	N0	M0	Localized	Yes	Yes	Alive	146	Alive
8374111	2004	27	21-40	Black	I	T1	N0	M0	Localized	Yes	Yes	Alive	149	Alive
8374453	2004	53	41-60	White	II	T1	N1	M0	Distant	Yes	No/Unknown	Alive	155	Alive
8374642	2004	32	21-40	White	I	T1	N0	M0	Localized	Yes	No/Unknown	Alive	152	Alive
8375264	2004	37	21-40	White	I	T1	N0	M0	Regional	Yes	Yes	Alive	153	Alive
8375731	2004	0	0-20	Others	I	T1	N0	M0	Localized	Yes	No/Unknown	Alive	125	Alive
8376168	2004	44	41-60	White	II	T2	N1	M0	Regional	Yes	No/Unknown	Alive	148	Alive
8376233	2004	38	21-40	White	I	T2	N0	M0	Localized	Yes	Yes	Alive	153	Alive
8376610	2004	20	0-20	White	II	T1	N3	M0	Regional	Yes	No/Unknown	Alive	147	Alive
8377150	2004	47	41-60	White	I	T1	N0	M0	Localized	Yes	No/Unknown	Alive	147	Alive
8377476	2004	33	21-40	White	I	T1	N0	M0	Localized	Yes	Yes	Alive	148	Alive
8377709	2004	29	21-40	White	I	T1	N0	M0	Localized	Yes	No/Unknown	Alive	148	Alive
8378147	2004	42	41-60	White	I	T1	N0	M0	Localized	Yes	Yes	Alive	151	Alive
8378443	2004	24	21-40	White	III	T1	N2	M0	Regional	Yes	No/Unknown	Alive	152	Alive
8378568	2004	36	21-40	White	I	T1	N0	M0	Localized	Yes	Yes	Alive	152	Alive
8378617	2004	21	21-40	White	I	T1	N0	M0	Localized	Yes	No/Unknown	Alive	154	Alive
8378769	2004	24	21-40	White	I	T2	N0	M0	Localized	Yes	No/Unknown	Alive	152	Alive
8378959	2004	24	21-40	White	I	T1	N0	M0	Localized	Yes	No/Unknown	Alive	149	Alive
8379046	2004	38	21-40	White	I	T2	N0	M0	Regional	Yes	No/Unknown	Alive	150	Alive
8379100	2004	42	41-60	White	II	T2	N1	M0	Regional	Yes	No/Unknown	Alive	145	Alive
8379290	2004	47	41-60	White	I	T1	N0	M0	Localized	Yes	Yes	Alive	152	Alive
8379346	2004	32	21-40	White	I	T2	N0	M0	Localized	Yes	No/Unknown	Alive	152	Alive
8379688	2004	43	41-60	White	I	T2	N0	M0	Localized	Yes	No/Unknown	Diseases of Heart	115	Dead
8379788	2010	40	21-40	White	I	T2	N0	M0	Localized	Yes	No/Unknown	Alive	76	Alive
8381517	2004	34	21-40	White	I	T1	N0	M0	Localized	Yes	Yes	Alive	147	Alive
8381772	2004	24	21-40	White	II	T1	N1	M0	Regional	Yes	Yes	Alive	149	Alive
8382402	2004	23	21-40	White	III	T1	N1	M0	Regional	Yes	No/Unknown	Alive	148	Alive
8382404	2004	41	41-60	White	I	T2	N0	M0	Localized	Yes	Yes	Alive	140	Alive
8382491	2004	23	21-40	White	I	T1	N0	M0	Localized	Yes	Yes	Alive	153	Alive
8382569	2004	35	21-40	White	I	T2	N0	M0	Localized	Yes	Yes	Alive	147	Alive
8382647	2004	42	41-60	White	III	T1	N2	M1	Distant	Yes	No/Unknown	Alive	154	Alive
8382732	2004	25	21-40	White	I	T2	N0	M0	Localized	Yes	No/Unknown	Alive	148	Alive
8382736	2004	36	21-40	White	I	T1	N0	M0	Localized	Yes	No/Unknown	Alive	149	Alive
8383575	2004	31	21-40	White	II	T2	N2	M0	Regional	Yes	No/Unknown	Testis	14	Dead
8383739	2004	39	21-40	White	I	T1	N0	M0	Localized	Yes	No/Unknown	Alive	151	Alive
8384151	2004	24	21-40	White	I	T2	N0	M0	Localized	Yes	Yes	Alive	145	Alive
8384467	2004	51	41-60	White	I	T2	N0	M0	Localized	Yes	Yes	Alive	121	Alive
8384764	2004	29	21-40	White	I	T1	N0	M0	Localized	Yes	Yes	Alive	145	Alive
8385085	2004	37	21-40	White	I	T2	N0	M0	Localized	Yes	No/Unknown	Alive	147	Alive
8385303	2004	24	21-40	White	I	T1	N0	M0	Localized	Yes	No/Unknown	Alive	152	Alive
8385329	2004	28	21-40	White	I	T2	N0	M0	Localized	Yes	No/Unknown	Alive	154	Alive
8385493	2004	34	21-40	White	I	T1	N0	M0	Localized	Yes	No/Unknown	Alive	145	Alive
8385534	2004	20	0-20	White	I	T3	N0	M0	Regional	Yes	No/Unknown	Alive	148	Alive
8385540	2004	25	21-40	White	I	T2	N0	M0	Localized	Yes	Yes	Alive	153	Alive
8385615	2004	23	21-40	White	I	T2	N0	M0	Localized	Yes	No/Unknown	Alive	151	Alive
8385795	2004	34	21-40	White	I	T1	N0	M0	Localized	Yes	Yes	Alive	153	Alive
8385879	2004	40	21-40	White	I	T1	N0	M0	Localized	Yes	No/Unknown	Alive	148	Alive
8386251	2004	35	21-40	White	I	T1	N0	M0	Localized	Yes	No/Unknown	Alive	148	Alive
8386283	2004	21	21-40	White	I	T1	N0	M0	Localized	Yes	Yes	Alive	150	Alive
8386297	2004	36	21-40	White	I	T1	N0	M0	Localized	Yes	Yes	Alive	141	Alive
8387106	2005	49	41-60	White	I	T1	N0	M0	Localized	Yes	Yes	Alive	141	Alive
8387462	2005	33	21-40	White	I	T2	N0	M0	Localized	Yes	Yes	Alive	142	Alive
8387782	2005	25	21-40	White	I	T1	N0	M0	Localized	Yes	Yes	Alive	139	Alive
8387789	2005	35	21-40	White	II	T2	N2	M0	Regional	Yes	No/Unknown	Alive	143	Alive
8387864	2005	43	41-60	White	I	T1	N0	M0	Localized	Yes	Yes	Alive	132	Alive
8388321	2005	20	0-20	Others	I	T1	N0	M0	Localized	Yes	No/Unknown	Alive	135	Alive
8388461	2005	36	21-40	White	I	T1	N0	M0	Localized	Yes	No/Unknown	Alive	135	Alive
8388905	2005	22	21-40	White	I	T2	N0	M0	Localized	Yes	Yes	Alive	135	Alive
8388931	2005	37	21-40	White	I	T1	N0	M0	Localized	Yes	Yes	Alive	134	Alive
8388941	2005	27	21-40	White	I	T1	N0	M0	Regional	Yes	No/Unknown	Alive	143	Alive
8388962	2005	29	21-40	White	I	T1	N0	M0	Localized	Yes	Yes	Alive	138	Alive
8389010	2005	20	0-20	White	I	T1	N0	M0	Localized	Yes	No/Unknown	Alive	138	Alive
8389058	2005	27	21-40	White	III	T1	N1	M0	Regional	Yes	No/Unknown	Alive	138	Alive
8389164	2005	25	21-40	White	II	T2	N1	M0	Regional	Yes	No/Unknown	Alive	137	Alive
8389277	2005	26	21-40	White	I	T1	N0	M0	Localized	Yes	Yes	Alive	143	Alive
8389434	2005	26	21-40	White	I	T2	N0	M0	Localized	Yes	No/Unknown	Alive	142	Alive
8389778	2005	34	21-40	White	I	T1	N0	M0	Localized	Yes	No/Unknown	Alive	136	Alive
8390613	2005	37	21-40	White	I	T1	N0	M0	Localized	Yes	Yes	Alive	141	Alive
8390899	2005	39	21-40	White	I	T1	N0	M0	Localized	Yes	Yes	Alive	138	Alive
8390924	2005	35	21-40	White	I	T1	N0	M0	Localized	Yes	No/Unknown	Alive	142	Alive
8391077	2005	35	21-40	White	I	T2	N0	M0	Localized	Yes	Yes	Alive	141	Alive
8391304	2005	48	41-60	White	I	T1	N0	M0	Localized	Yes	Yes	Alive	138	Alive
8391558	2005	44	41-60	White	I	T1	N0	M0	Localized	Yes	No/Unknown	Alive	141	Alive
8391609	2005	44	41-60	White	I	T1	N0	M0	Regional	Yes	No/Unknown	Alive	142	Alive
8391793	2005	39	21-40	White	II	T1	N2	M0	Regional	Yes	No/Unknown	Alive	140	Alive
8391913	2005	42	41-60	White	I	T1	N0	M0	Localized	Yes	No/Unknown	Testis	17	Dead
8391990	2005	25	21-40	White	I	T1	N0	M0	Regional	Yes	No/Unknown	Alive	137	Alive
8392956	2005	52	41-60	White	I	T2	N0	M0	Localized	Yes	No/Unknown	Alive	141	Alive
8393074	2005	25	21-40	White	III	T1	N3	M1	Distant	Yes	No/Unknown	Alive	138	Alive
8393079	2005	17	0-20	White	I	T2	N0	M0	Regional	Yes	No/Unknown	Alive	138	Alive
8393761	2005	37	21-40	White	II	T2	N1	M0	Regional	Yes	Yes	Alive	138	Alive
8393790	2005	31	21-40	White	I	T2	N0	M0	Localized	Yes	No/Unknown	Alive	140	Alive
8394023	2005	32	21-40	White	I	T1	N0	M0	Localized	Yes	Yes	Alive	124	Alive
8394031	2005	38	21-40	White	I	T1	N0	M0	Localized	Yes	No/Unknown	Alive	135	Alive
8394158	2005	41	41-60	White	I	T1	N0	M0	Localized	Yes	Yes	Alive	136	Alive
8394212	2005	25	21-40	White	II	T2	N1	M0	Regional	Yes	No/Unknown	Alive	121	Alive
8394218	2005	42	41-60	White	I	T1	N0	M0	Localized	Yes	No/Unknown	Alive	133	Alive
8394235	2005	45	41-60	White	I	T2	N0	M0	Localized	Yes	Yes	Alive	134	Alive
8397525	2005	19	0-20	White	III	T1	N0	M1	Distant	Yes	No/Unknown	Testis	7	Dead
8397927	2005	45	41-60	White	I	T1	N0	M0	Localized	Yes	Yes	Alive	138	Alive
8399004	2005	29	21-40	White	I	T1	N0	M0	Localized	Yes	Yes	Alive	138	Alive
8399946	2005	38	21-40	White	I	T1	N0	M0	Localized	Yes	No/Unknown	Alive	5	Alive
8400386	2005	28	21-40	White	II	T1	N3	M0	Regional	Yes	No/Unknown	Alive	24	Alive
8408604	2005	40	21-40	White	I	T2	N0	M0	Localized	Yes	No/Unknown	Alive	142	Alive
8408633	2005	37	21-40	White	I	T1	N0	M0	Localized	Yes	Yes	Alive	138	Alive
8409172	2005	29	21-40	White	I	T1	N0	M0	Localized	Yes	No/Unknown	Alive	140	Alive
8409526	2005	33	21-40	White	I	T2	N0	M0	Localized	Yes	No/Unknown	Alive	135	Alive
8410143	2005	24	21-40	White	I	T1	N0	M0	Localized	Yes	No/Unknown	Alive	137	Alive
8410358	2005	53	41-60	White	I	T2	N0	M0	Localized	Yes	No/Unknown	Alive	132	Alive
8410371	2005	41	41-60	White	II	T3	N1	M0	Regional	Yes	No/Unknown	Alive	133	Alive
8410520	2005	32	21-40	White	I	T1	N0	M0	Localized	Yes	No/Unknown	Suicide and Self-Inflicted Injury	85	Dead
8411006	2005	20	0-20	White	I	T1	N0	M0	Localized	Yes	No/Unknown	Alive	141	Alive
8411035	2005	40	21-40	White	I	T1	N0	M0	Localized	Yes	Yes	Alive	134	Alive
8412539	2005	27	21-40	White	I	T1	N0	M0	Localized	Yes	Yes	Alive	143	Alive
8413602	2005	45	41-60	White	I	T1	N0	M0	Localized	Yes	No/Unknown	Alive	132	Alive
8413993	2005	40	21-40	White	I	T1	N0	M0	Localized	Yes	No/Unknown	Alive	134	Alive
8414289	2005	43	41-60	White	I	T2	N0	M0	Localized	Yes	No/Unknown	Alive	134	Alive
8414372	2005	22	21-40	White	II	T2	N2	M0	Regional	Yes	No/Unknown	Alive	141	Alive
8415171	2005	57	41-60	White	I	T1	N0	M0	Localized	Yes	Yes	Alive	132	Alive
8415331	2005	25	21-40	White	I	T1	N0	M0	Localized	Yes	No/Unknown	Alive	139	Alive
8416057	2005	54	41-60	White	I	T1	N0	M0	Localized	Yes	Yes	Alive	132	Alive
8417258	2004	29	21-40	White	III	T2	N1	M0	Distant	Yes	No/Unknown	Alive	139	Alive
8417899	2005	24	21-40	White	I	T2	N0	M0	Localized	Yes	No/Unknown	Alive	132	Alive
8418711	2005	23	21-40	White	I	T2	N0	M0	Localized	Yes	Yes	Alive	141	Alive
8418810	2005	25	21-40	White	I	T2	N0	M0	Localized	Yes	No/Unknown	Alive	140	Alive
8419167	2005	54	41-60	White	I	T1	N0	M0	Localized	Yes	Yes	Alive	143	Alive
8419467	2005	30	21-40	White	I	T1	N0	M0	Localized	Yes	Yes	Alive	136	Alive
8419523	2005	33	21-40	White	I	T1	N0	M0	Localized	Yes	No/Unknown	Alive	0	Alive
8420079	2005	31	21-40	White	I	T1	N0	M0	Localized	Yes	No/Unknown	Alive	138	Alive
8421265	2005	28	21-40	White	II	T2	N2	M0	Regional	Yes	No/Unknown	Alive	140	Alive
8422103	2004	42	41-60	White	I	T1	N0	M0	Localized	Yes	Yes	Alive	144	Alive
8422491	2004	41	41-60	White	I	T1	N0	M0	Localized	Yes	Yes	Alive	154	Alive
8422758	2004	53	41-60	White	I	T1	N0	M0	Localized	Yes	Yes	Alive	153	Alive
8423747	2004	22	21-40	White	I	T1	N0	M0	Localized	Yes	No/Unknown	Alive	145	Alive
8424410	2006	27	21-40	White	III	T1	N2	M0	Regional	Yes	No/Unknown	Alive	131	Alive
8424412	2006	42	41-60	White	I	T2	N0	M0	Localized	Yes	No/Unknown	Alive	131	Alive
8424589	2006	42	41-60	Others	I	T2	N0	M0	Localized	Yes	Yes	Alive	127	Alive
8424636	2006	46	41-60	White	I	T2	N0	M0	Localized	Yes	Yes	Alive	109	Alive
8424761	2006	39	21-40	White	I	T2	N0	M0	Localized	Yes	No/Unknown	Alive	128	Alive
8424770	2006	32	21-40	Black	I	T1	N0	M0	Localized	Yes	No/Unknown	Alive	125	Alive
8425201	2006	42	41-60	White	I	T1	N0	M0	Localized	Yes	No/Unknown	Alive	115	Alive
8425240	2006	29	21-40	Black	I	T1	N0	M0	Localized	Yes	No/Unknown	Alive	120	Alive
8425243	2006	41	41-60	White	I	T1	N0	M0	Localized	Yes	No/Unknown	Alive	129	Alive
8425303	2006	47	41-60	White	I	T1	N0	M0	Localized	Yes	No/Unknown	Diseases of Heart	81	Dead
8425311	2006	35	21-40	White	I	T1	N0	M0	Localized	Yes	No/Unknown	Alive	123	Alive
8425349	2006	22	21-40	White	III	T2	N0	M1	Distant	Yes	No/Unknown	Alive	124	Alive
8425368	2006	33	21-40	White	I	T2	N0	M0	Regional	Yes	No/Unknown	Alive	124	Alive
8425410	2006	37	21-40	White	I	T1	N0	M0	Localized	Yes	Yes	Alive	130	Alive
8425427	2006	37	21-40	White	I	T1	N0	M0	Localized	Yes	Yes	Alive	117	Alive
8425432	2006	47	41-60	White	II	T2	N1	M0	Regional	Yes	Yes	Alive	126	Alive
8425687	2006	34	21-40	White	I	T2	N0	M0	Regional	Yes	Yes	Alive	123	Alive
8425691	2006	29	21-40	White	I	T2	N0	M0	Localized	Yes	Yes	Alive	123	Alive
8425733	2006	39	21-40	White	I	T2	N0	M0	Localized	Yes	Yes	Alive	126	Alive
8426082	2006	35	21-40	White	I	T1	N0	M0	Localized	Yes	No/Unknown	Alive	128	Alive
8426118	2006	25	21-40	White	I	T1	N0	M0	Regional	Yes	No/Unknown	Alive	130	Alive
8426232	2006	28	21-40	White	I	T1	N0	M0	Regional	Yes	No/Unknown	Alive	123	Alive
8426367	2006	35	21-40	Black	I	T1	N0	M0	Localized	Yes	No/Unknown	Alive	128	Alive
8426479	2006	70	>60	Black	I	T2	N0	M0	Regional	Yes	No/Unknown	Alive	129	Alive
8426635	2006	51	41-60	White	I	T2	N0	M0	Localized	Yes	Yes	Alive	128	Alive
8426645	2006	36	21-40	White	I	T1	N0	M0	Localized	Yes	Yes	Alive	126	Alive
8426714	2006	27	21-40	White	I	T2	N0	M0	Localized	Yes	Yes	Alive	126	Alive
8427367	2006	32	21-40	White	I	T1	N0	M0	Localized	Yes	Yes	Alive	127	Alive
8427514	2006	29	21-40	White	I	T2	N0	M0	Localized	Yes	Yes	Alive	126	Alive
8427537	2006	42	41-60	White	III	T1	N0	M1	Distant	Yes	No/Unknown	Alive	124	Alive
8427542	2006	25	21-40	White	I	T1	N0	M0	Localized	Yes	Yes	Alive	104	Alive
8427548	2006	34	21-40	White	I	T3	N0	M0	Regional	Yes	No/Unknown	Alive	127	Alive
8427554	2006	42	41-60	White	I	T2	N0	M0	Regional	Yes	Yes	Alive	122	Alive
8427580	2006	39	21-40	White	I	T1	N0	M0	Localized	Yes	Yes	Alive	122	Alive
8427612	2006	34	21-40	White	I	T1	N0	M0	Localized	Yes	No/Unknown	Alive	120	Alive
8427630	2006	40	21-40	White	I	T1	N0	M0	Localized	Yes	Yes	Alive	124	Alive
8427795	2006	21	21-40	White	II	T1	N1	M0	Regional	Yes	Yes	Alive	124	Alive
8427819	2006	28	21-40	White	I	T1	N0	M0	Localized	Yes	No/Unknown	Alive	96	Alive
8427873	2006	63	>60	White	I	T1	N0	M0	Localized	Yes	Yes	Alive	125	Alive
8428050	2006	54	41-60	White	I	T1	N0	M0	Localized	Yes	Yes	Alive	131	Alive
8428063	2006	45	41-60	White	III	T3	N3	M0	Regional	Yes	No/Unknown	Alive	127	Alive
8428079	2006	39	21-40	White	I	T1	N0	M0	Localized	Yes	No/Unknown	Alive	127	Alive
8428084	2006	21	21-40	White	II	T1	N2	M0	Regional	Yes	No/Unknown	Alive	127	Alive
8428087	2006	37	21-40	White	II	T1	N2	M0	Regional	Yes	No/Unknown	Alive	123	Alive
8428093	2006	31	21-40	White	I	T2	N0	M0	Localized	Yes	No/Unknown	Alive	123	Alive
8428095	2006	38	21-40	Others	I	T1	N0	M0	Localized	Yes	Yes	Alive	122	Alive
8428098	2006	36	21-40	White	I	T1	N0	M0	Localized	Yes	Yes	Alive	127	Alive
8428456	2006	35	21-40	White	I	T2	N0	M0	Localized	Yes	Yes	Alive	129	Alive
8428497	2006	30	21-40	White	I	T1	N0	M0	Localized	Yes	No/Unknown	Alive	10	Alive
8428639	2006	47	41-60	White	III	T3	N0	M1	Distant	Yes	No/Unknown	Alive	123	Alive
8428764	2006	27	21-40	White	I	T2	N0	M0	Localized	Yes	Yes	Alive	129	Alive
8428797	2006	40	21-40	White	I	T1	N0	M0	Localized	Yes	Yes	Alive	123	Alive
8428803	2006	36	21-40	White	II	T1	N1	M0	Regional	Yes	No/Unknown	Alive	123	Alive
8428829	2006	46	41-60	White	II	T2	N1	M0	Regional	Yes	No/Unknown	Alive	126	Alive
8428836	2006	21	21-40	White	III	T1	N0	M1	Distant	Yes	No/Unknown	Alive	120	Alive
8428914	2006	37	21-40	White	I	T2	N0	M0	Regional	Yes	Yes	Alive	127	Alive
8428933	2006	25	21-40	White	I	T1	N0	M0	Localized	Yes	No/Unknown	Alive	127	Alive
8428951	2006	48	41-60	Others	I	T1	N0	M0	Localized	Yes	No/Unknown	Alive	121	Alive
8429055	2006	27	21-40	Others	I	T2	N0	M0	Localized	Yes	No/Unknown	Alive	0	Alive
8429453	2006	49	41-60	White	I	T1	N0	M0	Localized	Yes	No/Unknown	Alive	130	Alive
8431249	2006	25	21-40	White	I	T1	N0	M0	Localized	Yes	No/Unknown	Alive	128	Alive
8435469	2006	28	21-40	White	I	T2	N0	M0	Localized	Yes	Yes	Alive	130	Alive
8436420	2006	47	41-60	White	I	T1	N0	M0	Localized	Yes	Yes	Alive	125	Alive
8438108	2006	35	21-40	White	I	T1	N0	M0	Localized	Yes	Yes	Alive	129	Alive
8438117	2006	37	21-40	White	I	T2	N0	M0	Localized	Yes	Yes	Alive	130	Alive
8438124	2006	32	21-40	White	I	T2	N0	M0	Localized	Yes	Yes	Alive	130	Alive
8438125	2006	37	21-40	White	III	T1	N2	M0	Regional	Yes	No/Unknown	Alive	40	Alive
8438138	2006	29	21-40	White	I	T2	N0	M0	Localized	Yes	Yes	Alive	125	Alive
8444595	2006	34	21-40	White	I	T1	N0	M0	Localized	Yes	No/Unknown	Alive	128	Alive
8452560	2006	43	41-60	White	III	T1	N3	M0	Regional	Yes	No/Unknown	Alive	120	Alive
8456405	2006	34	21-40	White	I	T2	N0	M0	Localized	Yes	No/Unknown	Alive	124	Alive
8457707	2005	27	21-40	White	III	T1	N3	M0	Regional	Yes	No/Unknown	Alive	134	Alive
8458403	2006	29	21-40	White	I	T2	N0	M0	Localized	Yes	Yes	Alive	122	Alive
8458833	2006	35	21-40	White	I	T1	N0	M0	Localized	Yes	Yes	Alive	123	Alive
8459128	2007	35	21-40	White	II	T1	N1	M0	Regional	Yes	No/Unknown	Alive	119	Alive
8460033	2007	48	41-60	White	II	T2	N1	M0	Regional	Yes	Yes	Other Cause of Death	95	Dead
8460047	2007	24	21-40	White	III	T2	N2	M0	Regional	Yes	No/Unknown	Alive	116	Alive
8460658	2007	22	21-40	White	I	T1	N0	M0	Localized	Yes	No/Unknown	Alive	109	Alive
8460859	2007	29	21-40	White	I	T2	N0	M0	Localized	Yes	No/Unknown	Alive	118	Alive
8461096	2007	43	41-60	White	I	T1	N0	M0	Localized	Yes	Yes	Alive	110	Alive
8461439	2007	19	0-20	White	I	T1	N0	M0	Localized	Yes	No/Unknown	Alive	117	Alive
8462623	2007	24	21-40	White	I	T1	N0	M0	Localized	Yes	No/Unknown	Alive	118	Alive
8462665	2007	27	21-40	White	III	T3	N1	M0	Regional	Yes	No/Unknown	Alive	116	Alive
8462686	2007	34	21-40	White	I	T1	N0	M0	Localized	Yes	No/Unknown	Alive	116	Alive
8462862	2007	44	41-60	White	I	T1	N0	M0	Localized	Yes	Yes	Alive	113	Alive
8464261	2007	48	41-60	White	I	T1	N0	M0	Localized	Yes	No/Unknown	Alive	108	Alive
8464512	2007	28	21-40	White	I	T1	N0	M0	Localized	Yes	No/Unknown	Alive	111	Alive
8464772	2007	56	41-60	White	I	T1	N0	M0	Localized	Yes	No/Unknown	Alive	111	Alive
8465300	2007	29	21-40	White	I	T1	N0	M0	Localized	Yes	No/Unknown	Alive	113	Alive
8465466	2007	30	21-40	White	I	T1	N0	M0	Localized	Yes	Yes	Alive	113	Alive
8465590	2007	36	21-40	White	I	T1	N0	M0	Localized	Yes	Yes	Alive	112	Alive
8466131	2007	48	41-60	White	I	T1	N0	M0	Localized	Yes	Yes	Alive	119	Alive
8468213	2007	40	21-40	White	I	T1	N0	M0	Localized	Yes	Yes	Alive	110	Alive
8468358	2007	33	21-40	White	I	T2	N0	M0	Localized	Yes	Yes	Alive	114	Alive
8468384	2004	25	21-40	White	I	T1	N0	M0	Localized	Yes	Yes	Alive	145	Alive
8469722	2007	38	21-40	White	I	T1	N0	M0	Localized	Yes	No/Unknown	Alive	119	Alive
8470057	2007	31	21-40	White	II	T1	N1	M0	Regional	Yes	Yes	Alive	115	Alive
8471354	2007	38	21-40	White	III	T2	N1	M0	Regional	Yes	Yes	Alive	118	Alive
8471649	2007	42	41-60	White	I	T2	N0	M0	Localized	Yes	Yes	Alive	114	Alive
8471911	2007	29	21-40	White	I	T1	N0	M0	Localized	Yes	Yes	Alive	114	Alive
8471922	2007	17	0-20	White	I	T2	N0	M0	Localized	Yes	No/Unknown	Alive	112	Alive
8473785	2007	24	21-40	White	I	T1	N0	M0	Localized	Yes	No/Unknown	Alive	113	Alive
8473984	2007	20	0-20	White	II	T2	N1	M0	Regional	Yes	No/Unknown	Alive	117	Alive
8474157	2007	39	21-40	White	I	T2	N0	M0	Localized	Yes	Yes	Alive	110	Alive
8474465	2007	22	21-40	White	III	T3	N3	M1	Distant	Yes	No/Unknown	Alive	117	Alive
8475002	2007	39	21-40	White	I	T1	N0	M0	Localized	Yes	No/Unknown	Alive	117	Alive
8476068	2007	43	41-60	White	I	T1	N0	M0	Localized	Yes	No/Unknown	Alive	112	Alive
8478427	2007	44	41-60	White	III	T2	N0	M1	Distant	Yes	No/Unknown	Alive	113	Alive
8478595	2007	31	21-40	White	I	T1	N0	M0	Localized	Yes	No/Unknown	Alive	114	Alive
8478650	2007	16	0-20	White	I	T2	N0	M0	Localized	Yes	No/Unknown	Alive	112	Alive
8478984	2007	22	21-40	Black	II	T3	N2	M0	Regional	Yes	No/Unknown	Alive	119	Alive
8479106	2007	15	0-20	White	I	T2	N0	M0	Localized	Yes	No/Unknown	Alive	118	Alive
8479348	2007	46	41-60	White	I	T1	N0	M0	Localized	Yes	Yes	Alive	108	Alive
8479437	2007	17	0-20	White	I	T2	N0	M0	Localized	Yes	No/Unknown	Alive	116	Alive
8479676	2007	23	21-40	White	I	T2	N0	M0	Localized	Yes	No/Unknown	Alive	117	Alive
8480798	2007	54	41-60	White	I	T1	N0	M0	Localized	Yes	No/Unknown	Alive	115	Alive
8481708	2007	44	41-60	White	I	T2	N0	M0	Localized	Yes	No/Unknown	Alive	114	Alive
8481785	2007	47	41-60	White	I	T2	N0	M0	Localized	Yes	Yes	Alive	109	Alive
8481817	2007	29	21-40	White	I	T1	N0	M0	Localized	Yes	No/Unknown	Alive	111	Alive
8484193	2007	53	41-60	White	I	T1	N0	M0	Localized	Yes	Yes	Alive	114	Alive
8485427	2007	48	41-60	White	I	T1	N0	M0	Localized	Yes	Yes	Alive	118	Alive
8485567	2007	27	21-40	White	I	T1	N0	M0	Localized	Yes	No/Unknown	Alive	111	Alive
8485718	2007	30	21-40	White	I	T1	N0	M0	Localized	Yes	Yes	Alive	116	Alive
8485867	2007	54	41-60	White	I	T2	N0	M0	Localized	Yes	Yes	Alive	119	Alive
8485955	2007	45	41-60	White	I	T1	N0	M0	Localized	Yes	Yes	Alive	108	Alive
8486270	2007	46	41-60	White	III	T2	N1	M1	Distant	Yes	No/Unknown	Alive	118	Alive
8486853	2007	24	21-40	White	I	T2	N0	M0	Localized	Yes	Yes	Alive	114	Alive
8487585	2007	27	21-40	White	I	T1	N0	M0	Regional	Yes	Yes	Alive	118	Alive
8488529	2007	34	21-40	White	I	T1	N0	M0	Localized	Yes	No/Unknown	Alive	110	Alive
8489255	2007	18	0-20	Others	II	T2	N2	M0	Regional	Yes	No/Unknown	Alive	112	Alive
8489309	2007	40	21-40	White	I	T1	N0	M0	Localized	Yes	Yes	Alive	118	Alive
8489520	2007	39	21-40	White	I	T2	N0	M0	Localized	Yes	Yes	Alive	116	Alive
8489572	2007	37	21-40	White	I	T1	N0	M0	Localized	Yes	No/Unknown	Alive	115	Alive
8489585	2007	36	21-40	White	II	T2	N2	M0	Regional	Yes	No/Unknown	Alive	119	Alive
8489690	2007	40	21-40	White	I	T1	N0	M0	Localized	Yes	No/Unknown	Alive	115	Alive
8489985	2007	23	21-40	White	I	T1	N0	M0	Localized	Yes	Yes	Alive	109	Alive
8490061	2007	27	21-40	White	I	T1	N0	M0	Localized	Yes	Yes	Alive	111	Alive
8490200	2007	57	41-60	White	I	T2	N0	M0	Localized	Yes	Yes	Alive	116	Alive
8490265	2007	32	21-40	White	I	T1	N0	M0	Localized	Yes	No/Unknown	Alive	108	Alive
8491049	2007	37	21-40	White	I	T1	N0	M0	Localized	Yes	Yes	Alive	119	Alive
8491059	2007	36	21-40	White	I	T2	N0	M0	Localized	Yes	Yes	Alive	116	Alive
8491161	2007	37	21-40	White	I	T2	N0	M0	Localized	Yes	Yes	Alive	111	Alive
8491288	2007	40	21-40	White	I	T2	N0	M0	Localized	Yes	Yes	Alive	109	Alive
8491967	2007	28	21-40	White	I	T2	N0	M0	Localized	Yes	No/Unknown	Alive	115	Alive
8492027	2007	22	21-40	White	III	T1	N2	M1	Distant	Yes	Yes	Alive	113	Alive
8492158	2007	34	21-40	White	II	T2	N1	M0	Regional	Yes	No/Unknown	Alive	118	Alive
8492289	2007	54	41-60	White	III	T1	N1	M0	Regional	Yes	No/Unknown	Alive	117	Alive
8492704	2007	33	21-40	Others	I	T1	N0	M0	Localized	Yes	Yes	Alive	119	Alive
8492993	2007	21	21-40	White	I	T1	N0	M0	Localized	Yes	Yes	Alive	112	Alive
8493501	2007	41	41-60	White	I	T1	N0	M0	Localized	Yes	Yes	Other Cause of Death	41	Dead
8494817	2008	26	21-40	White	I	T1	N0	M0	Localized	Yes	Yes	Alive	99	Alive
8494935	2008	32	21-40	White	I	T1	N0	M0	Localized	Yes	No/Unknown	Alive	103	Alive
8495362	2008	29	21-40	White	I	T2	N0	M0	Localized	Yes	No/Unknown	Alive	106	Alive
8496093	2007	17	0-20	White	I	T1	N0	M0	Localized	Yes	No/Unknown	Alive	113	Alive
8496463	2008	45	41-60	White	II	T1	N1	M0	Regional	Yes	Yes	Alive	101	Alive
8496538	2007	18	0-20	White	III	T3	N1	M1	Distant	Yes	No/Unknown	Alive	113	Alive
8496899	2007	48	41-60	White	III	T1	N2	M0	Regional	Yes	No/Unknown	Alive	111	Alive
8497390	2008	16	0-20	White	I	T1	N0	M0	Localized	Yes	No/Unknown	Alive	100	Alive
8497469	2008	35	21-40	White	I	T2	N0	M0	Localized	Yes	No/Unknown	Alive	105	Alive
8498056	2008	45	41-60	White	I	T1	N0	M0	Localized	Yes	Yes	Alive	100	Alive
8498974	2007	34	21-40	White	I	T1	N0	M0	Localized	Yes	No/Unknown	Alive	113	Alive
8499094	2008	18	0-20	White	I	T1	N0	M0	Localized	Yes	Yes	Alive	106	Alive
8499323	2008	48	41-60	White	I	T2	N0	M0	Localized	Yes	Yes	Alive	102	Alive
8500115	2008	46	41-60	White	I	T2	N0	M0	Localized	Yes	Yes	Alive	100	Alive
8500250	2008	24	21-40	White	I	T1	N0	M0	Localized	Yes	Yes	Alive	106	Alive
8501010	2008	46	41-60	White	I	T1	N0	M0	Localized	Yes	No/Unknown	Alive	98	Alive
8501758	2008	26	21-40	White	II	T1	N1	M0	Regional	Yes	No/Unknown	Alive	107	Alive
8502051	2008	39	21-40	White	I	T2	N0	M0	Localized	Yes	No/Unknown	Alive	105	Alive
8502106	2008	28	21-40	White	II	T2	N1	M0	Regional	Yes	No/Unknown	Alive	17	Alive
8502528	2008	33	21-40	White	III	T1	N1	M0	Regional	Yes	Yes	Alive	85	Alive
8502943	2008	39	21-40	White	I	T2	N0	M0	Localized	Yes	Yes	Alive	102	Alive
8503061	2008	41	41-60	White	I	T1	N0	M0	Localized	Yes	No/Unknown	Alive	102	Alive
8503067	2008	26	21-40	White	III	T3	N1	M1	Distant	Yes	No/Unknown	Alive	99	Alive
8503521	2008	40	21-40	White	I	T2	N0	M0	Localized	Yes	Yes	Alive	104	Alive
8503953	2008	47	41-60	White	III	T2	N1	M0	Regional	Yes	No/Unknown	Alive	103	Alive
8504103	2008	48	41-60	White	I	T2	N0	M0	Localized	Yes	Yes	Alive	106	Alive
8504785	2008	35	21-40	White	I	T1	N0	M0	Localized	Yes	No/Unknown	Alive	104	Alive
8504827	2007	46	41-60	White	I	T1	N0	M0	Localized	Yes	No/Unknown	Alive	90	Alive
8504852	2007	28	21-40	White	I	T2	N0	M0	Localized	Yes	Yes	Alive	118	Alive
8504973	2007	52	41-60	White	I	T1	N0	M0	Localized	Yes	No/Unknown	Alive	113	Alive
8505239	2008	21	21-40	White	I	T1	N0	M0	Localized	Yes	No/Unknown	Alive	101	Alive
8505242	2008	42	41-60	White	I	T2	N0	M0	Localized	Yes	Yes	Alive	104	Alive
8505333	2007	25	21-40	White	I	T3	N0	M0	Regional	Yes	No/Unknown	Alive	111	Alive
8505369	2008	32	21-40	White	I	T2	N0	M0	Localized	Yes	No/Unknown	Alive	75	Alive
8506008	2008	28	21-40	White	I	T2	N0	M0	Localized	Yes	No/Unknown	Alive	103	Alive
8506591	2008	50	41-60	White	I	T1	N0	M0	Localized	Yes	Yes	Alive	104	Alive
8508405	2008	30	21-40	White	I	T1	N0	M0	Localized	Yes	No/Unknown	Alive	100	Alive
8510070	2008	43	41-60	White	I	T2	N0	M0	Localized	Yes	No/Unknown	Alive	107	Alive
8511797	2008	36	21-40	White	I	T1	N0	M0	Localized	Yes	No/Unknown	Alive	107	Alive
8512130	2008	53	41-60	White	I	T2	N0	M0	Localized	Yes	No/Unknown	Alive	83	Alive
8512270	2008	46	41-60	White	I	T2	N0	M0	Localized	Yes	Yes	Alive	100	Alive
8512984	2008	32	21-40	White	I	T2	N0	M0	Localized	Yes	No/Unknown	Alive	97	Alive
8513124	2008	21	21-40	Others	I	T1	N0	M0	Regional	Yes	No/Unknown	Alive	20	Alive
8515578	2008	41	41-60	White	I	T1	N0	M0	Localized	Yes	No/Unknown	Alive	105	Alive
8515724	2008	35	21-40	White	I	T2	N0	M0	Localized	Yes	Yes	Alive	107	Alive
8515752	2008	47	41-60	White	I	T1	N0	M0	Localized	Yes	Yes	Alive	98	Alive
8516338	2008	55	41-60	White	I	T2	N0	M0	Localized	Yes	No/Unknown	Alive	107	Alive
8516578	2008	29	21-40	White	I	T1	N0	M0	Localized	Yes	Yes	Alive	97	Alive
8516587	2008	33	21-40	White	I	T1	N0	M0	Localized	Yes	No/Unknown	Alive	106	Alive
8516903	2008	21	21-40	White	I	T1	N0	M0	Localized	Yes	No/Unknown	Alive	97	Alive
8517128	2007	30	21-40	White	I	T1	N0	M0	Localized	Yes	No/Unknown	Alive	109	Alive
8517838	2009	46	41-60	White	II	T1	N3	M0	Regional	Yes	No/Unknown	Alive	95	Alive
8520298	2008	32	21-40	White	I	T1	N0	M0	Localized	Yes	Yes	Alive	100	Alive
8520550	2008	51	41-60	White	II	T2	N3	M0	Regional	Yes	No/Unknown	Alive	103	Alive
8520759	2007	43	41-60	White	III	T1	N0	M1	Distant	Yes	No/Unknown	Alive	114	Alive
8520882	2008	43	41-60	White	I	T2	N0	M0	Localized	Yes	No/Unknown	Alive	96	Alive
8521103	2008	37	21-40	White	I	T1	N0	M0	Localized	Yes	No/Unknown	Alive	2	Alive
8521388	2008	25	21-40	White	I	T1	N0	M0	Localized	Yes	Yes	Alive	104	Alive
8521527	2008	48	41-60	White	I	T1	N0	M0	Localized	Yes	Yes	Alive	105	Alive
8521646	2008	45	41-60	White	II	T1	N1	M0	Regional	Yes	No/Unknown	Alive	105	Alive
8521934	2008	38	21-40	White	I	T2	N0	M0	Localized	Yes	Yes	Alive	99	Alive
8521940	2008	35	21-40	White	I	T3	N0	M0	Regional	Yes	No/Unknown	Alive	107	Alive
8522025	2008	45	41-60	White	I	T1	N0	M0	Localized	Yes	No/Unknown	Alive	103	Alive
8522172	2008	25	21-40	White	I	T1	N0	M0	Localized	Yes	No/Unknown	Alive	107	Alive
8522541	2008	38	21-40	White	I	T1	N0	M0	Localized	Yes	No/Unknown	Alive	98	Alive
8522794	2008	18	0-20	White	I	T1	N0	M0	Localized	Yes	No/Unknown	Alive	97	Alive
8522995	2008	25	21-40	Others	I	T2	N0	M0	Localized	Yes	No/Unknown	Alive	104	Alive
8523131	2008	45	41-60	White	I	T1	N0	M0	Localized	Yes	Yes	Alive	100	Alive
8523216	2008	38	21-40	White	I	T1	N0	M0	Localized	Yes	Yes	Alive	98	Alive
8912286	2008	37	21-40	White	I	T1	N0	M0	Localized	Yes	No/Unknown	Alive	90	Alive
8912363	2008	22	21-40	White	I	T2	N0	M0	Localized	Yes	No/Unknown	Alive	103	Alive
8912477	2008	54	41-60	White	I	T3	N0	M0	Regional	Yes	Yes	Alive	100	Alive
8913099	2008	52	41-60	White	I	T1	N0	M0	Localized	Yes	Yes	Alive	102	Alive
8913398	2008	40	21-40	White	I	T2	N0	M0	Localized	Yes	No/Unknown	Alive	98	Alive
8913469	2008	17	0-20	Others	I	T2	N0	M0	Localized	Yes	No/Unknown	Alive	96	Alive
8913861	2008	29	21-40	White	I	T1	N0	M0	Localized	Yes	No/Unknown	Alive	101	Alive
8914724	2008	20	0-20	White	III	T1	N2	M1	Distant	Yes	No/Unknown	Alive	102	Alive
8915004	2008	30	21-40	White	I	T1	N0	M0	Localized	Yes	No/Unknown	Alive	105	Alive
8915115	2008	51	41-60	White	II	T1	N1	M0	Regional	Yes	Yes	Alive	105	Alive
8915408	2008	43	41-60	White	I	T1	N0	M0	Localized	Yes	No/Unknown	Alive	104	Alive
8915818	2008	27	21-40	Others	III	T1	N0	M1	Distant	Yes	No/Unknown	Alive	105	Alive
8917543	2008	20	0-20	White	III	T2	N1	M0	Regional	Yes	No/Unknown	Alive	104	Alive
8917959	2008	38	21-40	White	I	T2	N0	M0	Localized	Yes	No/Unknown	Alive	0	Alive
8918603	2008	40	21-40	White	I	T1	N0	M0	Localized	Yes	Yes	Alive	92	Alive
8920638	2009	19	0-20	White	I	T2	N0	M0	Localized	Yes	No/Unknown	Alive	87	Alive
8920648	2009	35	21-40	White	I	T1	N0	M0	Localized	Yes	Yes	Alive	94	Alive
8920737	2009	32	21-40	White	I	T2	N0	M0	Localized	Yes	No/Unknown	Alive	92	Alive
8920808	2009	52	41-60	White	I	T1	N0	M0	Localized	Yes	Yes	Alive	92	Alive
8920973	2009	44	41-60	White	I	T1	N0	M0	Regional	Yes	No/Unknown	Alive	94	Alive
8921008	2009	51	41-60	White	I	T3	N0	M0	Regional	Yes	No/Unknown	Alive	92	Alive
8922605	2009	45	41-60	White	I	T1	N0	M0	Localized	Yes	No/Unknown	Alive	89	Alive
8923124	2009	23	21-40	White	I	T2	N0	M0	Localized	Yes	No/Unknown	Alive	94	Alive
8923468	2009	40	21-40	Black	I	T2	N0	M0	Localized	Yes	No/Unknown	Alive	91	Alive
8924369	2009	45	41-60	White	II	T2	N1	M0	Regional	Yes	No/Unknown	Alive	88	Alive
8924378	2009	25	21-40	White	I	T1	N0	M0	Localized	Yes	No/Unknown	Alive	88	Alive
8924418	2009	41	41-60	White	I	T1	N0	M0	Localized	Yes	No/Unknown	Suicide and Self-Inflicted Injury	31	Dead
8924460	2009	40	21-40	White	I	T2	N0	M0	Localized	Yes	No/Unknown	Alive	89	Alive
8925122	2009	46	41-60	White	I	T2	N0	M0	Localized	Yes	Yes	Alive	85	Alive
8925189	2009	39	21-40	Others	I	T1	N0	M0	Localized	Yes	No/Unknown	Alive	88	Alive
8925281	2009	46	41-60	White	III	T3	N3	M0	Regional	Yes	No/Unknown	Alive	80	Alive
8925625	2009	19	0-20	White	I	T1	N0	M0	Localized	Yes	No/Unknown	Alive	89	Alive
8925644	2009	15	0-20	White	I	T2	N0	M0	Localized	Yes	No/Unknown	Alive	85	Alive
8926748	2009	26	21-40	White	I	T2	N0	M0	Localized	Yes	No/Unknown	Alive	93	Alive
8926780	2009	29	21-40	White	I	T1	N0	M0	Localized	Yes	Yes	Alive	91	Alive
8926790	2009	20	0-20	White	I	T2	N0	M0	Localized	Yes	No/Unknown	Alive	91	Alive
8927077	2009	24	21-40	White	I	T1	N0	M0	Localized	Yes	No/Unknown	Alive	93	Alive
8927869	2008	20	0-20	White	I	T2	N0	M0	Localized	Yes	No/Unknown	Alive	105	Alive
8928239	2008	45	41-60	White	I	T2	N0	M0	Localized	Yes	No/Unknown	Alive	105	Alive
8928827	2009	43	41-60	White	I	T1	N0	M0	Localized	Yes	No/Unknown	Alive	77	Alive
8928984	2009	31	21-40	White	II	T3	N2	M0	Regional	Yes	No/Unknown	Alive	3	Alive
8929003	2009	25	21-40	White	III	T3	N0	M1	Distant	Yes	No/Unknown	Alive	86	Alive
8929156	2009	57	41-60	White	I	T2	N0	M0	Localized	Yes	Yes	Alive	93	Alive
8929525	2009	38	21-40	White	I	T1	N0	M0	Localized	Yes	No/Unknown	Alive	93	Alive
8929726	2009	35	21-40	White	II	T2	N2	M0	Regional	Yes	No/Unknown	Alive	95	Alive
8929926	2009	29	21-40	White	III	T1	N1	M1	Distant	Yes	No/Unknown	Alive	95	Alive
8930362	2009	71	>60	White	I	T1	N0	M0	Localized	Yes	Yes	Alive	90	Alive
8931881	2009	60	41-60	White	I	T4	N0	M0	Distant	Yes	No/Unknown	Alive	85	Alive
8932166	2009	34	21-40	White	I	T2	N0	M0	Localized	Yes	No/Unknown	Alive	91	Alive
8932297	2009	44	41-60	Others	II	T1	N1	M0	Regional	Yes	Yes	Alive	95	Alive
8932467	2009	65	>60	White	I	T1	N0	M0	Localized	Yes	No/Unknown	Alive	88	Alive
8932520	2009	30	21-40	White	I	T1	N0	M0	Localized	Yes	No/Unknown	Alive	0	Alive
8932544	2009	59	41-60	White	I	T1	N0	M0	Localized	Yes	Yes	Alive	95	Alive
8932807	2009	31	21-40	White	I	T1	N0	M0	Localized	Yes	No/Unknown	Alive	94	Alive
8932854	2009	44	41-60	White	I	T3	N0	M0	Regional	Yes	No/Unknown	Alive	86	Alive
8934270	2009	34	21-40	White	I	T1	N0	M0	Localized	Yes	Yes	Alive	93	Alive
8934721	2009	24	21-40	White	I	T2	N0	M0	Localized	Yes	No/Unknown	Alive	95	Alive
8935740	2009	50	41-60	White	I	T1	N0	M0	Localized	Yes	No/Unknown	Alive	85	Alive
8936444	2009	43	41-60	White	I	T1	N0	M0	Localized	Yes	Yes	Alive	87	Alive
8937285	2009	21	21-40	White	II	T2	N1	M0	Regional	Yes	No/Unknown	Alive	87	Alive
8937749	2009	27	21-40	White	I	T1	N0	M0	Localized	Yes	No/Unknown	Alive	89	Alive
8938058	2007	33	21-40	White	I	T2	N0	M0	Localized	Yes	No/Unknown	Alive	108	Alive
8938871	2009	44	41-60	White	I	T1	N0	M0	Localized	Yes	No/Unknown	Alive	85	Alive
8939016	2009	52	41-60	Black	III	T4	N0	M1	Distant	Yes	No/Unknown	Cerebrovascular Diseases	6	Dead
8939042	2009	27	21-40	White	I	T1	N0	M0	Localized	Yes	No/Unknown	Alive	88	Alive
8939468	2009	25	21-40	Others	I	T1	N0	M0	Localized	Yes	No/Unknown	Alive	84	Alive
8939575	2009	35	21-40	White	I	T1	N0	M0	Localized	Yes	No/Unknown	Alive	88	Alive
8940254	2009	30	21-40	White	II	T1	N1	M0	Regional	Yes	No/Unknown	Alive	92	Alive
8940304	2008	27	21-40	White	I	T1	N0	M0	Localized	Yes	No/Unknown	Alive	107	Alive
8941009	2008	24	21-40	White	III	T1	N3	M1	Distant	Yes	No/Unknown	Alive	98	Alive
8941113	2009	17	0-20	White	I	T2	N0	M0	Localized	Yes	No/Unknown	Alive	84	Alive
8941282	2009	28	21-40	White	I	T1	N0	M0	Localized	Yes	No/Unknown	Alive	89	Alive
8943126	2008	22	21-40	White	I	T1	N0	M0	Localized	Yes	No/Unknown	Alive	100	Alive
8943336	2009	22	21-40	White	I	T1	N0	M0	Localized	Yes	No/Unknown	Alive	84	Alive
8943563	2009	25	21-40	White	I	T2	N0	M0	Localized	Yes	No/Unknown	Alive	92	Alive
8945614	2009	30	21-40	White	II	T1	N1	M0	Regional	Yes	No/Unknown	Alive	88	Alive
8946562	2009	24	21-40	White	I	T2	N0	M0	Localized	Yes	No/Unknown	Alive	91	Alive
8946569	2009	32	21-40	White	II	T1	N1	M0	Regional	Yes	Yes	Alive	86	Alive
8947861	2009	40	21-40	White	I	T1	N0	M0	Localized	Yes	Yes	Alive	87	Alive
8947978	2009	49	41-60	White	I	T2	N0	M0	Regional	Yes	Yes	Alive	77	Alive
8947985	2009	38	21-40	White	I	T2	N0	M0	Regional	Yes	Yes	Alive	85	Alive
8948601	2009	54	41-60	Others	I	T1	N0	M0	Localized	Yes	No/Unknown	Alive	0	Alive
8949571	2009	29	21-40	White	I	T2	N0	M0	Localized	Yes	Yes	Alive	85	Alive
8952017	2009	53	41-60	White	II	T1	N1	M0	Regional	Yes	No/Unknown	Alive	93	Alive
8952043	2009	32	21-40	White	I	T1	N0	M0	Regional	Yes	No/Unknown	Alive	89	Alive
8952048	2009	33	21-40	White	I	T1	N0	M0	Localized	Yes	No/Unknown	Alive	91	Alive
8952328	2009	56	41-60	White	II	T1	N1	M0	Regional	Yes	Yes	Alive	88	Alive
8952611	2009	25	21-40	White	I	T1	N0	M0	Localized	Yes	No/Unknown	Alive	93	Alive
8954511	2009	44	41-60	White	I	T1	N0	M0	Localized	Yes	No/Unknown	Alive	91	Alive
8955248	2009	24	21-40	White	I	T2	N0	M0	Localized	Yes	No/Unknown	Alive	84	Alive
8955629	2009	35	21-40	White	I	T1	N0	M0	Regional	Yes	Yes	Alive	95	Alive
8955722	2009	41	41-60	White	I	T1	N0	M0	Localized	Yes	Yes	Alive	94	Alive
8956745	2009	19	0-20	White	I	T2	N0	M0	Localized	Yes	No/Unknown	Alive	94	Alive
8956975	2009	24	21-40	White	III	T4	N0	M1	Distant	Yes	No/Unknown	Alive	89	Alive
8957166	2009	34	21-40	White	I	T2	N0	M0	Localized	Yes	No/Unknown	Alive	87	Alive
8958017	2008	40	21-40	White	I	T1	N0	M0	Localized	Yes	No/Unknown	Alive	101	Alive
8958119	2009	29	21-40	White	I	T1	N0	M0	Localized	Yes	No/Unknown	Alive	85	Alive
8967763	2010	55	41-60	White	I	T1	N0	M0	Regional	Yes	No/Unknown	Alive	78	Alive
8971224	2010	31	21-40	White	I	T1	N0	M0	Localized	Yes	Yes	Alive	10	Alive
8971363	2010	18	0-20	White	I	T1	N0	M0	Localized	Yes	No/Unknown	Alive	75	Alive
8976571	2010	28	21-40	White	II	T1	N2	M0	Regional	Yes	No/Unknown	Alive	4	Alive
8976590	2010	57	41-60	White	I	T2	N0	M0	Localized	Yes	No/Unknown	Alive	75	Alive
8977375	2010	25	21-40	White	I	T1	N0	M0	Localized	Yes	No/Unknown	Alive	74	Alive
8977377	2010	35	21-40	White	I	T1	N0	M0	Localized	Yes	No/Unknown	Alive	73	Alive
8977863	2010	52	41-60	White	I	T2	N0	M0	Localized	Yes	Yes	Alive	72	Alive
8978803	2010	35	21-40	White	I	T2	N0	M0	Localized	Yes	No/Unknown	Alive	81	Alive
8978952	2010	46	41-60	White	III	T1	N2	M1	Distant	Yes	No/Unknown	Alive	75	Alive
8979770	2010	30	21-40	White	III	T2	N2	M1	Regional	Yes	No/Unknown	Alive	73	Alive
8979924	2010	24	21-40	White	I	T2	N0	M0	Localized	Yes	Yes	Alive	83	Alive
8979980	2009	31	21-40	White	III	T2	N0	M1	Distant	Yes	No/Unknown	Alive	92	Alive
8980062	2009	16	0-20	White	III	T2	N0	M1	Distant	Yes	No/Unknown	Alive	63	Alive
8980847	2010	45	41-60	White	I	T1	N0	M0	Localized	Yes	No/Unknown	Alive	78	Alive
8980977	2009	0	0-20	Others	I	T1	N0	M0	Localized	Yes	No/Unknown	Alive	48	Alive
8981453	2010	37	21-40	White	I	T2	N0	M0	Regional	Yes	No/Unknown	Alive	77	Alive
8983030	2009	36	21-40	White	I	T1	N0	M0	Localized	Yes	No/Unknown	Alive	88	Alive
8983349	2010	39	21-40	White	I	T1	N0	M0	Localized	Yes	Yes	Alive	75	Alive
8983390	2010	34	21-40	White	I	T2	N0	M0	Localized	Yes	No/Unknown	Alive	72	Alive
8983484	2010	26	21-40	White	III	T2	N3	M1	Distant	Yes	Yes	Other Cause of Death	53	Dead
8983551	2010	31	21-40	White	II	T2	N1	M0	Regional	Yes	No/Unknown	Alive	81	Alive
8983552	2010	29	21-40	White	I	T1	N0	M0	Localized	Yes	No/Unknown	Alive	77	Alive
8984486	2010	28	21-40	White	I	T2	N0	M0	Regional	Yes	No/Unknown	Alive	75	Alive
8984862	2010	47	41-60	White	I	T1	N0	M0	Localized	Yes	Yes	Alive	37	Alive
8985118	2010	41	41-60	White	I	T1	N0	M0	Localized	Yes	No/Unknown	Alive	76	Alive
8985500	2009	49	41-60	White	I	T2	N0	M0	Localized	Yes	No/Unknown	Alive	89	Alive
8986375	2010	31	21-40	White	II	T2	N2	M0	Regional	Yes	Yes	Alive	75	Alive
8986935	2010	48	41-60	White	I	T2	N0	M0	Localized	Yes	Yes	Alive	81	Alive
8986949	2010	53	41-60	White	I	T2	N0	M0	Localized	Yes	No/Unknown	Alive	77	Alive
8987089	2010	30	21-40	White	I	T1	N0	M0	Localized	Yes	Yes	Alive	73	Alive
8987171	2010	22	21-40	White	I	T3	N0	M0	Regional	Yes	No/Unknown	Alive	74	Alive
8987304	2010	39	21-40	White	III	T2	N3	M0	Regional	Yes	No/Unknown	Alive	72	Alive
8987431	2010	41	41-60	White	I	T2	N0	M0	Localized	Yes	No/Unknown	Alive	81	Alive
8987578	2010	55	41-60	White	I	T1	N0	M0	Localized	Yes	No/Unknown	Alive	76	Alive
8987583	2010	40	21-40	White	I	T1	N0	M0	Localized	Yes	Yes	Alive	76	Alive
8987593	2010	49	41-60	White	I	T2	N0	M0	Localized	Yes	Yes	Alive	73	Alive
8987602	2010	29	21-40	Others	I	T1	N0	M0	Localized	Yes	No/Unknown	Alive	79	Alive
8987624	2010	18	0-20	White	I	T1	N0	M0	Localized	Yes	No/Unknown	Alive	82	Alive
8987800	2010	55	41-60	White	I	T1	N0	M0	Localized	Yes	No/Unknown	Alive	80	Alive
8987837	2010	44	41-60	White	I	T1	N0	M0	Localized	Yes	Yes	Alive	78	Alive
8987960	2010	37	21-40	White	I	T1	N0	M0	Localized	Yes	No/Unknown	Alive	80	Alive
8988014	2010	55	41-60	White	I	T2	N0	M0	Localized	Yes	Yes	Alive	72	Alive
8988186	2010	17	0-20	White	I	T1	N0	M0	Localized	Yes	No/Unknown	Alive	73	Alive
8990484	2010	33	21-40	White	I	T1	N0	M0	Localized	Yes	No/Unknown	Alive	80	Alive
8991114	2010	26	21-40	White	I	T1	N0	M0	Localized	Yes	Yes	Alive	2	Alive
8991281	2010	40	21-40	Others	I	T1	N0	M0	Localized	Yes	No/Unknown	Alive	76	Alive
8991938	2010	20	0-20	White	I	T1	N0	M0	Localized	Yes	No/Unknown	Alive	83	Alive
8992533	2010	49	41-60	White	II	T2	N1	M0	Regional	Yes	No/Unknown	Alive	78	Alive
8992662	2010	51	41-60	White	II	T2	N3	M0	Regional	Yes	No/Unknown	Alive	73	Alive
8992779	2010	37	21-40	Others	I	T1	N0	M0	Localized	Yes	No/Unknown	Alive	74	Alive
8992780	2010	29	21-40	Others	I	T2	N0	M0	Localized	Yes	No/Unknown	Alive	73	Alive
8992788	2010	30	21-40	White	III	T3	N2	M1	Regional	Yes	No/Unknown	Alive	76	Alive
8993303	2010	27	21-40	White	I	T1	N0	M0	Localized	Yes	No/Unknown	Alive	82	Alive
8993466	2010	27	21-40	White	I	T3	N0	M0	Regional	Yes	No/Unknown	Alive	83	Alive
8993484	2010	40	21-40	White	I	T2	N0	M0	Localized	Yes	No/Unknown	Alive	75	Alive
8993648	2010	42	41-60	White	I	T1	N0	M0	Localized	Yes	No/Unknown	Alive	81	Alive
8993718	2010	38	21-40	White	I	T1	N0	M0	Localized	Yes	Yes	Alive	78	Alive
8993814	2010	54	41-60	White	I	T2	N0	M0	Localized	Yes	Yes	Alive	83	Alive
8993852	2010	23	21-40	White	I	T2	N0	M0	Localized	Yes	No/Unknown	Alive	82	Alive
8994060	2010	27	21-40	White	I	T1	N0	M0	Localized	Yes	No/Unknown	Alive	74	Alive
8994156	2010	56	41-60	White	I	T1	N0	M0	Localized	Yes	Yes	Alive	80	Alive
8994595	2010	46	41-60	White	I	T2	N0	M0	Regional	Yes	No/Unknown	Alive	73	Alive
8995709	2010	56	41-60	White	I	T1	N0	M0	Localized	Yes	No/Unknown	Alive	82	Alive
8995874	2010	34	21-40	White	I	T3	N0	M0	Regional	Yes	Yes	Alive	78	Alive
8995892	2010	25	21-40	White	I	T1	N0	M0	Localized	Yes	No/Unknown	Alive	81	Alive
8996090	2011	46	41-60	White	II	T2	N3	M0	Regional	Yes	Yes	Alive	65	Alive
8996706	2011	30	21-40	White	I	T1	N0	M0	Localized	Yes	No/Unknown	Alive	67	Alive
8997767	2011	25	21-40	White	I	T1	N0	M0	Localized	Yes	No/Unknown	Alive	5	Alive
8997772	2011	57	41-60	White	I	T1	N0	M0	Localized	Yes	Yes	Alive	69	Alive
8998402	2011	46	41-60	White	I	T3	N0	M0	Regional	Yes	No/Unknown	Alive	70	Alive
8998585	2011	37	21-40	Black	I	T1	N0	M0	Localized	Yes	No/Unknown	Alive	69	Alive
8998653	2011	41	41-60	White	I	T1	N0	M0	Localized	Yes	No/Unknown	Alive	71	Alive
8998918	2011	46	41-60	White	I	T2	N0	M0	Regional	Yes	Yes	Alive	68	Alive
8998924	2011	30	21-40	White	I	T1	N0	M0	Localized	Yes	No/Unknown	Alive	60	Alive
8999232	2011	41	41-60	White	I	T1	N0	M0	Localized	Yes	No/Unknown	Alive	66	Alive
8999803	2011	33	21-40	White	I	T3	N0	M0	Regional	Yes	No/Unknown	Alive	69	Alive
9000026	2011	38	21-40	White	II	T1	N1	M0	Regional	Yes	Yes	Alive	67	Alive
9000219	2011	39	21-40	White	I	T2	N0	M0	Localized	Yes	No/Unknown	Alive	69	Alive
9000292	2011	34	21-40	White	III	T1	N0	M1	Distant	Yes	No/Unknown	Alive	68	Alive
9000925	2011	33	21-40	Black	III	T3	N1	M1	Distant	Yes	No/Unknown	Alive	64	Alive
9001589	2011	53	41-60	White	I	T2	N0	M0	Localized	Yes	No/Unknown	Alive	61	Alive
9001607	2011	45	41-60	White	I	T2	N0	M0	Regional	Yes	No/Unknown	Alive	64	Alive
9001610	2011	28	21-40	White	III	T1	N3	M1	Distant	Yes	No/Unknown	Alive	65	Alive
9001709	2011	28	21-40	White	I	T2	N0	M0	Localized	Yes	Yes	Alive	64	Alive
9001741	2011	25	21-40	White	I	T1	N0	M0	Localized	Yes	No/Unknown	Alive	67	Alive
9002376	2011	31	21-40	White	I	T1	N0	M0	Localized	Yes	No/Unknown	Alive	64	Alive
9003692	2011	40	21-40	White	I	T1	N0	M0	Localized	Yes	No/Unknown	Alive	4	Alive
9005990	2011	31	21-40	White	II	T2	N1	M0	Regional	Yes	No/Unknown	Alive	67	Alive
9006068	2011	36	21-40	White	I	T1	N0	M0	Localized	Yes	Yes	Alive	69	Alive
9006184	2011	29	21-40	White	III	T1	N0	M1	Distant	Yes	No/Unknown	Alive	67	Alive
9006331	2011	40	21-40	White	I	T1	N0	M0	Localized	Yes	No/Unknown	Alive	67	Alive
9007195	2011	26	21-40	White	I	T2	N0	M0	Localized	Yes	No/Unknown	Alive	64	Alive
9007554	2011	47	41-60	White	I	T2	N0	M0	Localized	Yes	Yes	Alive	65	Alive
9007595	2011	21	21-40	White	III	T1	N2	M1	Distant	Yes	No/Unknown	Alive	69	Alive
9007611	2011	22	21-40	Black	I	T1	N0	M0	Localized	Yes	No/Unknown	Alive	71	Alive
9007855	2011	35	21-40	White	I	T1	N0	M0	Localized	Yes	No/Unknown	Alive	60	Alive
9008126	2011	25	21-40	White	I	T1	N0	M0	Localized	Yes	No/Unknown	Alive	65	Alive
9008735	2011	24	21-40	White	I	T1	N0	M0	Localized	Yes	No/Unknown	Alive	62	Alive
9008926	2011	21	21-40	White	I	T2	N0	M0	Localized	Yes	No/Unknown	Alive	54	Alive
9008977	2011	48	41-60	White	III	T1	N3	M1	Distant	Yes	No/Unknown	Alive	65	Alive
9010132	2011	29	21-40	White	II	T2	N2	M0	Regional	Yes	No/Unknown	Alive	65	Alive
9010324	2011	43	41-60	White	III	T1	N3	M1	Distant	Yes	No/Unknown	Alive	62	Alive
9010330	2011	57	41-60	White	I	T2	N0	M0	Localized	Yes	No/Unknown	Alive	62	Alive
9011823	2011	34	21-40	White	I	T1	N0	M0	Localized	Yes	No/Unknown	Alive	71	Alive
9013006	2011	35	21-40	Black	I	T1	N0	M0	Localized	Yes	No/Unknown	Alive	69	Alive
9013574	2011	36	21-40	White	I	T2	N0	M0	Localized	Yes	Yes	Alive	4	Alive
9013737	2011	36	21-40	White	I	T1	N0	M0	Localized	Yes	No/Unknown	Alive	62	Alive
9013853	2011	32	21-40	White	III	T1	N3	M0	Regional	Yes	No/Unknown	Alive	55	Alive
9013949	2011	28	21-40	White	III	T1	N2	M1	Distant	Yes	No/Unknown	Alive	60	Alive
9015470	2011	30	21-40	White	I	T3	N0	M0	Regional	Yes	Yes	Alive	3	Alive
9016366	2008	27	21-40	White	I	T1	N0	M0	Localized	Yes	No/Unknown	Alive	106	Alive
9017308	2011	39	21-40	White	I	T2	N0	M0	Localized	Yes	No/Unknown	Alive	67	Alive
9017362	2008	45	41-60	White	I	T1	N0	M0	Localized	Yes	No/Unknown	State DC not available or state DC available but no COD	39	Dead
9017740	2011	28	21-40	White	I	T1	N0	M0	Localized	Yes	No/Unknown	Alive	65	Alive
9017922	2011	31	21-40	White	I	T1	N0	M0	Localized	Yes	Yes	Alive	70	Alive
9018554	2011	34	21-40	White	I	T1	N0	M0	Localized	Yes	Yes	Alive	71	Alive
9019083	2011	35	21-40	White	I	T1	N0	M0	Localized	Yes	Yes	Alive	63	Alive
9019392	2011	36	21-40	White	I	T2	N0	M0	Localized	Yes	No/Unknown	Alive	60	Alive
9020470	2011	34	21-40	White	I	T2	N0	M0	Localized	Yes	Yes	Alive	3	Alive
9020669	2011	28	21-40	White	I	T1	N0	M0	Localized	Yes	No/Unknown	Alive	61	Alive
9020781	2011	38	21-40	White	I	T1	N0	M0	Localized	Yes	No/Unknown	Alive	61	Alive
9021470	2011	36	21-40	White	III	T1	N3	M1	Distant	Yes	No/Unknown	Alive	61	Alive
9021835	2011	38	21-40	White	III	T1	N3	M0	Regional	Yes	No/Unknown	Alive	60	Alive
9022844	2011	26	21-40	Black	III	T1	N1	M1	Distant	Yes	No/Unknown	Alive	61	Alive
9023079	2011	49	41-60	White	I	T1	N0	M0	Localized	Yes	No/Unknown	Alive	65	Alive
9023342	2011	40	21-40	White	III	T3	N1	M1	Distant	Yes	No/Unknown	Alive	63	Alive
9024071	2011	63	>60	Others	III	T2	N1	M1	Distant	Yes	No/Unknown	Septicemia	2	Dead
9024535	2011	49	41-60	White	II	T1	N2	M0	Regional	Yes	No/Unknown	Alive	63	Alive
9024632	2011	45	41-60	White	I	T1	N0	M0	Localized	Yes	No/Unknown	Alive	62	Alive
9025138	2011	40	21-40	White	I	T1	N0	M0	Localized	Yes	Yes	Alive	62	Alive
9025271	2011	34	21-40	White	I	T2	N0	M0	Localized	Yes	No/Unknown	Alive	61	Alive
9025791	2011	54	41-60	White	I	T2	N0	M0	Localized	Yes	Yes	Alive	62	Alive
9026104	2011	17	0-20	White	I	T1	N0	M0	Localized	Yes	No/Unknown	Alive	62	Alive
9026703	2012	28	21-40	White	I	T1	N0	M0	Localized	Yes	Yes	Alive	59	Alive
9027251	2011	23	21-40	White	I	T1	N0	M0	Localized	Yes	No/Unknown	Alive	70	Alive
9027516	2011	52	41-60	White	I	T2	N0	M0	Localized	Yes	Yes	Alive	64	Alive
9027519	2011	51	41-60	White	I	T1	N0	M0	Localized	Yes	No/Unknown	Alive	62	Alive
9027605	2011	30	21-40	White	I	T2	N0	M0	Localized	Yes	No/Unknown	Alive	67	Alive
9028002	2011	23	21-40	White	I	T1	N0	M0	Localized	Yes	No/Unknown	Alive	61	Alive
9028069	2011	22	21-40	White	III	T3	N0	M1	Distant	Yes	No/Unknown	Alive	60	Alive
9028281	2011	45	41-60	White	I	T3	N0	M0	Regional	Yes	No/Unknown	Alive	65	Alive
9028754	2011	22	21-40	White	III	T2	N2	M1	Distant	Yes	No/Unknown	Alive	62	Alive
9030668	2011	41	41-60	White	I	T1	N0	M0	Localized	Yes	No/Unknown	Alive	67	Alive
9030701	2011	28	21-40	White	II	T2	N1	M0	Regional	Yes	Yes	Alive	66	Alive
9030795	2011	23	21-40	White	II	T1	N1	M0	Regional	Yes	No/Unknown	Alive	69	Alive
9030970	2011	29	21-40	White	I	T1	N0	M0	Localized	Yes	No/Unknown	Alive	65	Alive
9031179	2011	32	21-40	White	I	T2	N0	M0	Localized	Yes	No/Unknown	Alive	65	Alive
9031764	2011	25	21-40	White	II	T2	N2	M0	Regional	Yes	No/Unknown	Alive	65	Alive
9031949	2012	41	41-60	White	I	T1	N0	M0	Localized	Yes	No/Unknown	Alive	57	Alive
9032037	2012	32	21-40	White	I	T1	N0	M0	Localized	Yes	No/Unknown	Alive	58	Alive
9033613	2011	45	41-60	White	III	T2	N1	M1	Distant	Yes	No/Unknown	Alive	4	Alive
9033676	2011	43	41-60	White	I	T1	N0	M0	Localized	Yes	No/Unknown	Alive	61	Alive
9033869	2011	30	21-40	White	I	T1	N0	M0	Localized	Yes	No/Unknown	Alive	64	Alive
9034323	2011	39	21-40	White	I	T3	N0	M0	Regional	Yes	No/Unknown	Alive	62	Alive
9034500	2011	47	41-60	White	I	T1	N0	M0	Localized	Yes	No/Unknown	Alive	62	Alive
9035192	2012	26	21-40	White	I	T1	N0	M0	Localized	Yes	No/Unknown	Alive	57	Alive
9035296	2012	29	21-40	White	I	T2	N0	M0	Localized	Yes	No/Unknown	Alive	54	Alive
9035838	2012	23	21-40	White	I	T1	N0	M0	Localized	Yes	No/Unknown	Alive	56	Alive
9039469	2012	37	21-40	White	III	T4	N0	M1	Distant	Yes	Yes	Alive	4	Alive
9039656	2012	23	21-40	White	II	T2	N2	M0	Regional	Yes	No/Unknown	Alive	52	Alive
9039779	2012	22	21-40	White	I	T1	N0	M0	Localized	Yes	No/Unknown	Alive	59	Alive
9039814	2012	34	21-40	White	III	T1	N1	M1	Distant	Yes	No/Unknown	Alive	50	Alive
9039867	2012	51	41-60	White	I	T1	N0	M0	Localized	Yes	No/Unknown	Alive	53	Alive
9039872	2012	23	21-40	White	I	T1	N0	M0	Localized	Yes	No/Unknown	Alive	53	Alive
9040000	2012	44	41-60	White	I	T1	N0	M0	Localized	Yes	No/Unknown	Alive	58	Alive
9040057	2012	43	41-60	White	I	T1	N0	M0	Localized	Yes	Yes	Alive	51	Alive
9041974	2012	28	21-40	White	I	T2	N0	M0	Localized	Yes	No/Unknown	Alive	58	Alive
9041977	2012	31	21-40	White	III	T3	N0	M1	Distant	Yes	No/Unknown	Alive	53	Alive
9042728	2012	64	>60	White	I	T2	N0	M0	Localized	Yes	No/Unknown	Alive	48	Alive
9042817	2012	45	41-60	White	I	T1	N0	M0	Localized	Yes	Yes	Alive	50	Alive
9043572	2012	39	21-40	White	I	T1	N0	M0	Localized	Yes	No/Unknown	Alive	55	Alive
9044089	2012	26	21-40	White	II	T1	N1	M0	Regional	Yes	No/Unknown	Alive	51	Alive
9044556	2012	39	21-40	White	I	T1	N0	M0	Localized	Yes	No/Unknown	Alive	53	Alive
9046366	2012	44	41-60	White	I	T2	N0	M0	Localized	Yes	Yes	Alive	55	Alive
9046629	2012	46	41-60	White	I	T1	N0	M0	Localized	Yes	No/Unknown	Alive	55	Alive
9046815	2012	42	41-60	White	I	T2	N0	M0	Localized	Yes	No/Unknown	Alive	54	Alive
9046830	2012	35	21-40	White	I	T2	N0	M0	Localized	Yes	No/Unknown	Alive	51	Alive
9047171	2012	22	21-40	White	I	T2	N0	M0	Localized	Yes	No/Unknown	Alive	11	Alive
9048039	2012	38	21-40	White	I	T1	N0	M0	Localized	Yes	No/Unknown	Alive	56	Alive
9048778	2012	33	21-40	White	I	T1	N0	M0	Localized	Yes	No/Unknown	Alive	59	Alive
9049502	2012	27	21-40	White	III	T1	N2	M1	Distant	Yes	No/Unknown	Alive	7	Alive
9050242	2012	37	21-40	Others	I	T1	N0	M0	Localized	Yes	No/Unknown	Alive	1	Alive
9050454	2012	45	41-60	White	I	T1	N0	M0	Localized	Yes	No/Unknown	Alive	52	Alive
9051051	2012	37	21-40	White	I	T1	N0	M0	Localized	Yes	No/Unknown	Alive	55	Alive
9051184	2012	50	41-60	White	I	T2	N0	M0	Localized	Yes	No/Unknown	Alive	54	Alive
9052696	2012	30	21-40	White	I	T1	N0	M0	Localized	Yes	No/Unknown	Alive	56	Alive
9052790	2012	35	21-40	White	II	T3	N2	M0	Regional	Yes	No/Unknown	Alive	48	Alive
9052843	2012	36	21-40	White	I	T1	N0	M0	Localized	Yes	Yes	Alive	48	Alive
9052959	2012	32	21-40	White	II	T1	N2	M0	Regional	Yes	Yes	Alive	56	Alive
9053247	2012	44	41-60	White	I	T2	N0	M0	Localized	Yes	No/Unknown	Alive	48	Alive
9053418	2012	28	21-40	White	I	T1	N0	M0	Localized	Yes	No/Unknown	Alive	49	Alive
9054255	2012	51	41-60	White	I	T1	N0	M0	Localized	Yes	No/Unknown	Alive	59	Alive
9054972	2012	43	41-60	White	I	T1	N0	M0	Localized	Yes	No/Unknown	Alive	56	Alive
9055112	2012	49	41-60	White	I	T1	N0	M0	Localized	Yes	No/Unknown	Alive	54	Alive
9055576	2012	50	41-60	White	I	T1	N0	M0	Localized	Yes	No/Unknown	Alive	52	Alive
9055924	2012	16	0-20	White	I	T1	N0	M0	Localized	Yes	No/Unknown	Alive	52	Alive
9056023	2012	43	41-60	White	I	T1	N0	M0	Localized	Yes	No/Unknown	Alive	52	Alive
9056039	2012	40	21-40	White	I	T1	N0	M0	Localized	Yes	No/Unknown	Alive	52	Alive
9056247	2012	19	0-20	White	I	T1	N0	M0	Localized	Yes	No/Unknown	Alive	52	Alive
9056296	2012	22	21-40	White	I	T1	N0	M0	Localized	Yes	No/Unknown	Alive	51	Alive
9056653	2012	41	41-60	White	I	T1	N0	M0	Localized	Yes	No/Unknown	Alive	50	Alive
9056994	2012	49	41-60	White	II	T2	N2	M0	Regional	Yes	No/Unknown	Alive	48	Alive
9058331	2012	44	41-60	White	I	T1	N0	M0	Localized	Yes	No/Unknown	Alive	57	Alive
9059677	2012	25	21-40	White	I	T1	N0	M0	Localized	Yes	No/Unknown	Alive	59	Alive
9059790	2012	26	21-40	White	I	T1	N0	M0	Localized	Yes	No/Unknown	Alive	58	Alive
9060334	2012	21	21-40	White	II	T2	N1	M0	Regional	Yes	No/Unknown	Alive	48	Alive
9060340	2012	27	21-40	White	I	T1	N0	M0	Localized	Yes	No/Unknown	Alive	4	Alive
9060981	2012	24	21-40	White	III	T1	N2	M0	Regional	Yes	No/Unknown	Alive	57	Alive
9061061	2012	50	41-60	White	II	T2	N2	M0	Regional	Yes	No/Unknown	Alive	25	Alive
9061184	2012	51	41-60	White	I	T2	N0	M0	Localized	Yes	No/Unknown	Alive	51	Alive
9061382	2012	39	21-40	White	I	T2	N0	M0	Localized	Yes	No/Unknown	Alive	59	Alive
9061697	2012	49	41-60	White	II	T2	N1	M0	Regional	Yes	Yes	Alive	55	Alive
9061797	2012	52	41-60	White	I	T1	N0	M0	Localized	Yes	No/Unknown	Alive	59	Alive
9062247	2012	28	21-40	White	I	T1	N0	M0	Localized	Yes	No/Unknown	Alive	49	Alive
9062930	2012	35	21-40	White	I	T2	N0	M0	Localized	Yes	No/Unknown	Alive	51	Alive
9063341	2012	27	21-40	White	III	T1	N0	M1	Distant	Yes	No/Unknown	Alive	52	Alive
9064034	2012	34	21-40	White	III	T2	N2	M0	Regional	Yes	No/Unknown	Alive	55	Alive
9065804	2012	26	21-40	White	I	T1	N0	M0	Localized	Yes	No/Unknown	Alive	53	Alive
9065828	2012	35	21-40	White	I	T2	N0	M0	Localized	Yes	No/Unknown	Alive	50	Alive
9066035	2012	25	21-40	White	I	T2	N0	M0	Localized	Yes	No/Unknown	Alive	55	Alive
9066405	2012	50	41-60	White	I	T2	N0	M0	Localized	Yes	No/Unknown	Alive	51	Alive
9066415	2012	32	21-40	White	II	T2	N1	M0	Regional	Yes	No/Unknown	Alive	42	Alive
9067066	2012	31	21-40	White	III	T2	N2	M1	Distant	Yes	No/Unknown	Alive	53	Alive
9067080	2012	56	41-60	White	I	T2	N0	M0	Localized	Yes	No/Unknown	Alive	52	Alive
9067235	2012	38	21-40	Others	I	T1	N0	M0	Localized	Yes	Yes	Alive	49	Alive
9068188	2012	30	21-40	Black	II	T1	N1	M0	Regional	Yes	Yes	Alive	51	Alive
9068302	2012	24	21-40	White	I	T1	N0	M0	Localized	Yes	No/Unknown	Alive	48	Alive
9068894	2012	51	41-60	White	I	T1	N0	M0	Localized	Yes	Yes	Alive	49	Alive
9070176	2012	42	41-60	White	I	T1	N0	M0	Localized	Yes	No/Unknown	Alive	50	Alive
9070262	2012	26	21-40	White	I	T1	N0	M0	Localized	Yes	No/Unknown	Alive	54	Alive
9070628	2012	51	41-60	White	I	T2	N0	M0	Localized	Yes	No/Unknown	Alive	48	Alive
9070771	2012	38	21-40	White	I	T1	N0	M0	Localized	Yes	No/Unknown	Alive	58	Alive
9071319	2012	42	41-60	White	III	T4	N1	M1	Distant	Yes	No/Unknown	Alive	38	Alive
9071911	2012	40	21-40	White	I	T1	N0	M0	Localized	Yes	No/Unknown	Alive	49	Alive
9072425	2012	18	0-20	White	I	T2	N0	M0	Localized	Yes	No/Unknown	Alive	45	Alive
9072863	2012	28	21-40	White	I	T1	N0	M0	Localized	Yes	No/Unknown	Alive	58	Alive
9073447	2013	42	41-60	White	I	T1	N0	M0	Localized	Yes	Yes	Alive	37	Alive
9073459	2013	56	41-60	White	II	T1	N1	M0	Regional	Yes	Yes	Alive	45	Alive
9455617	2013	49	41-60	White	I	T1	N0	M0	Localized	Yes	No/Unknown	Alive	47	Alive
9456302	2013	26	21-40	White	I	T1	N0	M0	Localized	Yes	No/Unknown	Alive	43	Alive
9456328	2014	52	41-60	White	I	T1	N0	M0	Localized	Yes	No/Unknown	Alive	33	Alive
9456874	2013	31	21-40	White	I	T1	N0	M0	Localized	Yes	No/Unknown	Alive	41	Alive
9456954	2013	64	>60	White	I	T1	N0	M0	Localized	Yes	No/Unknown	Alive	42	Alive
9456997	2013	33	21-40	White	I	T1	N0	M0	Localized	Yes	No/Unknown	Alive	40	Alive
9457205	2013	60	41-60	White	III	T3	N1	M1	Distant	Yes	No/Unknown	Diabetes Mellitus	0	Dead
9457239	2013	35	21-40	White	I	T1	N0	M0	Localized	Yes	Yes	Alive	41	Alive
9457393	2013	34	21-40	White	I	T1	N0	M0	Localized	Yes	No/Unknown	Alive	41	Alive
9459358	2013	29	21-40	Others	I	T1	N0	M0	Localized	Yes	No/Unknown	Alive	46	Alive
9459436	2013	32	21-40	White	I	T1	N0	M0	Localized	Yes	No/Unknown	Alive	46	Alive
9460262	2013	29	21-40	White	I	T1	N0	M0	Localized	Yes	No/Unknown	Alive	47	Alive
9461380	2013	36	21-40	White	I	T2	N0	M0	Localized	Yes	No/Unknown	Alive	43	Alive
9461997	2013	34	21-40	White	I	T1	N0	M0	Localized	Yes	No/Unknown	Alive	43	Alive
9462035	2013	30	21-40	White	I	T2	N0	M0	Localized	Yes	Yes	Alive	42	Alive
9462318	2013	21	21-40	White	I	T2	N0	M0	Localized	Yes	No/Unknown	Alive	37	Alive
9462708	2013	25	21-40	White	I	T2	N0	M0	Localized	Yes	No/Unknown	Alive	38	Alive
9462922	2013	26	21-40	White	I	T1	N0	M0	Localized	Yes	No/Unknown	Alive	47	Alive
9463014	2013	21	21-40	White	III	T3	N3	M1	Distant	Yes	No/Unknown	Other Cause of Death	7	Dead
9463363	2013	33	21-40	White	I	T2	N0	M0	Localized	Yes	No/Unknown	Alive	41	Alive
9463678	2013	71	>60	White	I	T1	N0	M0	Localized	Yes	No/Unknown	Alive	40	Alive
9464201	2013	25	21-40	White	I	T2	N0	M0	Regional	Yes	No/Unknown	Alive	43	Alive
9464321	2013	54	41-60	White	I	T2	N0	M0	Localized	Yes	No/Unknown	Alive	41	Alive
9464791	2013	40	21-40	White	I	T1	N0	M0	Localized	Yes	No/Unknown	Alive	38	Alive
9465112	2013	60	41-60	White	I	T1	N0	M0	Localized	Yes	No/Unknown	Alive	44	Alive
9465866	2013	24	21-40	White	I	T1	N0	M0	Localized	Yes	No/Unknown	Alive	45	Alive
9466239	2013	25	21-40	White	II	T2	N1	M0	Regional	Yes	No/Unknown	Alive	36	Alive
9467516	2013	35	21-40	White	I	T1	N0	M0	Localized	Yes	No/Unknown	Alive	40	Alive
9467909	2013	32	21-40	White	II	T2	N2	M0	Regional	Yes	No/Unknown	Alive	37	Alive
9468148	2013	29	21-40	White	I	T2	N0	M0	Localized	Yes	No/Unknown	Alive	42	Alive
9468319	2013	57	41-60	White	III	T2	N0	M1	Distant	Yes	No/Unknown	Alive	42	Alive
9468626	2013	39	21-40	White	I	T2	N0	M0	Localized	Yes	No/Unknown	Alive	43	Alive
9468793	2013	34	21-40	White	I	T1	N0	M0	Localized	Yes	No/Unknown	Alive	38	Alive
9468976	2013	20	0-20	White	I	T1	N0	M0	Localized	Yes	No/Unknown	Alive	38	Alive
9469403	2013	23	21-40	White	I	T1	N0	M0	Localized	Yes	No/Unknown	Alive	41	Alive
9469457	2013	32	21-40	White	I	T1	N0	M0	Localized	Yes	No/Unknown	Alive	41	Alive
9470031	2013	42	41-60	Black	I	T1	N0	M0	Localized	Yes	No/Unknown	Alive	38	Alive
9471582	2013	32	21-40	Others	I	T2	N0	M0	Localized	Yes	No/Unknown	Alive	38	Alive
9473045	2013	29	21-40	White	II	T1	N3	M0	Regional	Yes	No/Unknown	Alive	36	Alive
9473095	2013	35	21-40	White	I	T2	N0	M0	Localized	Yes	No/Unknown	Alive	45	Alive
9473669	2013	23	21-40	Black	I	T2	N0	M0	Localized	Yes	No/Unknown	Alive	44	Alive
9473972	2013	25	21-40	White	I	T1	N0	M0	Localized	Yes	No/Unknown	Alive	40	Alive
9474052	2013	45	41-60	Black	I	T1	N0	M0	Localized	Yes	No/Unknown	Alive	32	Alive
9474227	2013	39	21-40	White	I	T2	N0	M0	Regional	Yes	Yes	Alive	42	Alive
9474692	2013	27	21-40	White	I	T1	N0	M0	Localized	Yes	No/Unknown	Alive	38	Alive
9474768	2013	24	21-40	White	II	T2	N2	M0	Regional	Yes	No/Unknown	Alive	39	Alive
9475173	2013	37	21-40	White	I	T1	N0	M0	Localized	Yes	No/Unknown	Alive	33	Alive
9475264	2013	47	41-60	White	I	T1	N0	M0	Localized	Yes	Yes	Alive	41	Alive
9476198	2013	31	21-40	Black	III	T3	N0	M1	Distant	Yes	No/Unknown	Alive	44	Alive
9477446	2012	69	>60	White	I	T1	N0	M0	Localized	Yes	No/Unknown	Alive	48	Alive
9477985	2013	27	21-40	White	I	T2	N0	M0	Localized	Yes	No/Unknown	Alive	0	Alive
9478091	2013	37	21-40	White	I	T1	N0	M0	Localized	Yes	No/Unknown	Alive	40	Alive
9478101	2013	24	21-40	White	I	T1	N0	M0	Localized	Yes	No/Unknown	Alive	38	Alive
9479003	2013	46	41-60	White	I	T1	N0	M0	Localized	Yes	No/Unknown	Alive	45	Alive
9479386	2013	49	41-60	White	II	T1	N3	M0	Regional	Yes	No/Unknown	Alive	34	Alive
9479686	2013	46	41-60	White	I	T1	N0	M0	Localized	Yes	No/Unknown	Alive	46	Alive
9479690	2012	35	21-40	White	I	T1	N0	M0	Localized	Yes	No/Unknown	Alive	57	Alive
9479855	2013	63	>60	White	I	T2	N0	M0	Localized	Yes	No/Unknown	Alive	28	Alive
9479875	2013	48	41-60	White	I	T1	N0	M0	Localized	Yes	No/Unknown	Alive	45	Alive
9480660	2013	28	21-40	White	I	T1	N0	M0	Localized	Yes	No/Unknown	Alive	38	Alive
9481098	2012	18	0-20	White	I	T1	N0	M0	Localized	Yes	No/Unknown	Alive	53	Alive
9482101	2013	22	21-40	White	I	T1	N0	M0	Localized	Yes	No/Unknown	Alive	37	Alive
9482393	2013	41	41-60	White	I	T1	N0	M0	Localized	Yes	No/Unknown	Alive	37	Alive
9483343	2013	27	21-40	White	I	T1	N0	M0	Localized	Yes	No/Unknown	Alive	38	Alive
9483491	2013	47	41-60	White	II	T1	N3	M0	Regional	Yes	No/Unknown	Alive	38	Alive
9484182	2013	32	21-40	White	I	T1	N0	M0	Localized	Yes	No/Unknown	Alive	47	Alive
9484558	2013	44	41-60	White	III	T2	N1	M1	Distant	Yes	No/Unknown	Alive	37	Alive
9484692	2013	42	41-60	White	I	T1	N0	M0	Localized	Yes	No/Unknown	Alive	40	Alive
9484705	2013	42	41-60	White	I	T1	N0	M0	Localized	Yes	No/Unknown	Alive	34	Alive
9484973	2013	63	>60	White	III	T1	N3	M1	Distant	Yes	No/Unknown	Testis	1	Dead
9485913	2013	47	41-60	White	I	T2	N0	M0	Localized	Yes	No/Unknown	Alive	45	Alive
9486215	2013	39	21-40	White	I	T1	N0	M0	Localized	Yes	No/Unknown	Alive	44	Alive
9486542	2013	35	21-40	White	I	T1	N0	M0	Localized	Yes	No/Unknown	Alive	43	Alive
9486707	2013	46	41-60	White	I	T1	N0	M0	Localized	Yes	Yes	Alive	43	Alive
9487403	2013	25	21-40	White	I	T1	N0	M0	Localized	Yes	No/Unknown	Alive	41	Alive
9488117	2013	22	21-40	White	I	T1	N0	M0	Localized	Yes	No/Unknown	Alive	38	Alive
9488186	2013	30	21-40	White	I	T1	N0	M0	Localized	Yes	No/Unknown	Alive	40	Alive
9488664	2013	50	41-60	White	I	T2	N0	M0	Localized	Yes	No/Unknown	Alive	36	Alive
9488730	2013	75	>60	White	I	T2	N0	M0	Localized	Yes	No/Unknown	Alive	41	Alive
9489140	2013	21	21-40	White	III	T2	N3	M1	Distant	Yes	No/Unknown	Alive	40	Alive
[truncated: 20,166 more rows]

## Sheet: train_set
Patient ID	Year of diagnosis	Age at diagnosis	Age4	Race	AJCC_stage	T_stage	N_stage	M_stage	SEER_stage	Surgery	Radiotherapy	CSS	Survival_months	OS	NomogramOS	NomogramCSS	TNMOS	TNMCSS
2924141	2004	31	21-40	White	I	T1	N0	M0	Localized	Yes	Yes	Alive	155	Alive	-0.608511	-0.405734	-0.285629	-0.367709
2924825	2004	30	21-40	White	I	T3	N0	M0	Regional	Yes	No/Unknown	Alive	155	Alive	0.282123	0.291436	0.119817	0.016635
2925839	2004	32	21-40	White	I	T1	N0	M0	Regional	Yes	Yes	Alive	152	Alive	0.282123	0.452498	-0.285629	-0.367709
2925927	2004	20	0-20	White	I	T1	N0	M0	Localized	Yes	Yes	Alive	152	Alive	-1.28845	-0.863053	-0.285629	-0.367709
2925956	2004	39	21-40	White	III	T1	N1	M1	Distant	Yes	No/Unknown	Alive	152	Alive	1.8447	2.66871	1.80343	2.48467
2940795	2004	43	41-60	Black	I	T1	N0	M0	Localized	Yes	No/Unknown	Alive	155	Alive	0.215574	-0.078372	-0.285629	-0.367709
2940906	2004	30	21-40	White	I	T1	N0	M0	Localized	Yes	No/Unknown	Alive	153	Alive	-0.608511	-0.808636	-0.285629	-0.367709
2941056	2004	30	21-40	White	I	T1	N0	M0	Localized	Yes	Yes	Alive	152	Alive	-0.608511	-0.405734	-0.285629	-0.367709
2941643	2004	44	41-60	White	I	T1	N0	M0	Localized	Yes	No/Unknown	Alive	155	Alive	0.071422	-0.351317	-0.285629	-0.367709
2941870	2004	52	41-60	White	I	T1	N0	M0	Localized	Yes	Yes	Diseases of Heart	135	Dead	0.071422	0.051585	-0.285629	-0.367709
2959216	2010	58	41-60	White	I	T1	N0	M0	Localized	Yes	No/Unknown	Alive	75	Alive	0.071422	-0.351317	-0.285629	-0.367709
2961901	2004	37	21-40	White	I	T1	N0	M0	Localized	Yes	Yes	Alive	150	Alive	-0.608511	-0.405734	-0.285629	-0.367709
2962598	2004	1	0-20	Others	I	T1	N0	M0	Localized	Yes	No/Unknown	Alive	44	Alive	-1.00014	-0.720064	-0.285629	-0.367709
2966030	2004	17	0-20	White	III	T2	N0	M1	Distant	Yes	No/Unknown	Alive	148	Alive	1.16476	2.33231	1.95054	2.55748
2973559	2004	28	21-40	White	I	T4	N0	M0	Regional	Yes	No/Unknown	Alive	150	Alive	0.282123	0.412355	0.322541	0.208807
2973914	2004	40	21-40	White	III	T2	N1	M1	Distant	Yes	Yes	Alive	150	Alive	1.8447	3.19253	2.00616	2.67684
2973957	2004	42	41-60	White	III	T1	N0	M1	Distant	Yes	No/Unknown	Alive	152	Alive	2.52463	3.12603	1.74782	2.36531
2974035	2004	25	21-40	White	I	T1	N0	M0	Localized	Yes	No/Unknown	Alive	142	Alive	-0.608511	-0.808636	-0.285629	-0.367709
2974064	2004	15	0-20	White	III	T1	N1	M1	Distant	Yes	No/Unknown	Testis	11	Dead	1.16476	2.21139	1.80343	2.48467
2974066	2004	39	21-40	White	I	T1	N0	M0	Localized	Yes	Yes	Alive	148	Alive	-0.608511	-0.405734	-0.285629	-0.367709
2974071	2004	33	21-40	White	II	T2	N1	M0	Regional	Yes	Yes	Alive	147	Alive	0.618093	0.958635	-0.027292	-0.056176
2974240	2004	32	21-40	White	I	T1	N0	M0	Localized	Yes	Yes	Alive	145	Alive	-0.608511	-0.405734	-0.285629	-0.367709
2974273	2004	34	21-40	White	I	T1	N0	M0	Localized	Yes	No/Unknown	Alive	149	Alive	-0.608511	-0.808636	-0.285629	-0.367709
2974770	2004	49	41-60	White	I	T1	N0	M0	Localized	Yes	Yes	Alive	154	Alive	0.071422	0.051585	-0.285629	-0.367709
2975630	2004	25	21-40	White	III	T4	N0	M1	Distant	Yes	No/Unknown	Alive	148	Alive	1.8447	3.03147	2.35599	2.94182
2976446	2004	21	21-40	White	I	T1	N0	M0	Localized	Yes	Yes	Alive	152	Alive	-0.608511	-0.405734	-0.285629	-0.367709
2976448	2004	42	41-60	White	I	T1	N0	M0	Localized	Yes	No/Unknown	Alive	150	Alive	0.071422	-0.351317	-0.285629	-0.367709
2977138	2004	48	41-60	Others	III	T2	N0	M1	Distant	Yes	No/Unknown	Testis	36	Dead	2.81293	3.79284	1.95054	2.55748
2978879	2004	29	21-40	White	I	T1	N0	M0	Localized	Yes	No/Unknown	Alive	144	Alive	-0.608511	-0.808636	-0.285629	-0.367709
2979228	2004	35	21-40	White	II	T3	N1	M0	Regional	Yes	Yes	Alive	128	Alive	0.618093	1.07955	0.175431	0.135997
2980496	2004	23	21-40	White	I	T1	N0	M0	Localized	Yes	Yes	Alive	144	Alive	-0.608511	-0.405734	-0.285629	-0.367709
2980648	2004	53	41-60	White	I	T1	N0	M0	Localized	Yes	No/Unknown	Alive	149	Alive	0.071422	-0.351317	-0.285629	-0.367709
2980650	2004	27	21-40	Others	I	T2	N0	M0	Localized	Yes	No/Unknown	Alive	147	Alive	-0.320207	-0.141825	-0.082906	-0.175537
2980819	2004	67	>60	White	I	T1	N0	M0	Localized	Yes	Yes	Alive	154	Alive	0.751355	0.508903	-0.285629	-0.367709
2980822	2004	28	21-40	White	I	T1	N0	M0	Localized	Yes	Yes	Alive	154	Alive	-0.608511	-0.405734	-0.285629	-0.367709
2980824	2004	34	21-40	White	III	T1	N3	M1	Distant	Yes	No/Unknown	Alive	152	Alive	1.8447	2.66871	1.91466	2.72339
2980909	2004	43	41-60	White	II	T1	N1	M0	Regional	Yes	No/Unknown	Alive	144	Alive	1.29803	0.892132	-0.230016	-0.248348
2980914	2004	46	41-60	White	III	T2	N0	M1	Distant	Yes	No/Unknown	Testis	32	Dead	2.52463	3.24695	1.95054	2.55748
2981061	2004	31	21-40	White	I	T1	N0	M0	Localized	Yes	Yes	Alive	144	Alive	-0.608511	-0.405734	-0.285629	-0.367709
2981190	2004	50	41-60	White	I	T1	N0	M0	Localized	Yes	Yes	Alive	147	Alive	0.071422	0.051585	-0.285629	-0.367709
2983042	2004	43	41-60	White	II	T1	N2	M0	Regional	Yes	No/Unknown	Alive	146	Alive	1.29803	0.892132	-0.174402	-0.128986
2983093	2004	33	21-40	White	II	T3	N1	M0	Regional	Yes	No/Unknown	Alive	147	Alive	0.618093	0.676653	0.175431	0.135997
2983328	2004	37	21-40	Others	III	T1	N0	M1	Distant	Yes	No/Unknown	Miscellaneous Malignant Cancer	48	Dead	2.133	3.2146	1.74782	2.36531
2985615	2004	59	41-60	White	III	T2	N0	M1	Distant	Yes	No/Unknown	Testis	16	Dead	2.52463	3.24695	1.95054	2.55748
2986533	2004	22	21-40	White	I	T1	N0	M0	Localized	Yes	Yes	Alive	144	Alive	-0.608511	-0.405734	-0.285629	-0.367709
2987338	2004	37	21-40	White	I	T1	N0	M0	Localized	Yes	Yes	Alive	148	Alive	-0.608511	-0.405734	-0.285629	-0.367709
2987811	2004	30	21-40	White	I	T1	N0	M0	Localized	Yes	No/Unknown	Alive	151	Alive	-0.608511	-0.808636	-0.285629	-0.367709
2987815	2004	32	21-40	White	I	T1	N0	M0	Localized	Yes	No/Unknown	Alive	151	Alive	-0.608511	-0.808636	-0.285629	-0.367709
2988005	2004	41	41-60	White	I	T1	N0	M0	Localized	Yes	No/Unknown	Alive	154	Alive	0.071422	-0.351317	-0.285629	-0.367709
2988636	2004	39	21-40	White	I	T1	N0	M0	Localized	Yes	Yes	Alive	147	Alive	-0.608511	-0.405734	-0.285629	-0.367709
2988642	2004	28	21-40	White	II	T2	N2	M0	Regional	Yes	No/Unknown	Alive	146	Alive	0.618093	0.555733	0.028322	0.063186
2988646	2004	24	21-40	White	I	T1	N0	M0	Localized	Yes	Yes	Alive	147	Alive	-0.608511	-0.405734	-0.285629	-0.367709
2989687	2005	60	41-60	White	III	T1	N2	M1	Distant	Yes	Yes	Testis	10	Dead	2.52463	3.52893	1.85905	2.60403
2990795	2005	38	21-40	White	I	T1	N0	M0	Localized	Yes	Yes	Alive	143	Alive	-0.608511	-0.405734	-0.285629	-0.367709
2991042	2005	17	0-20	White	III	T1	N3	M1	Distant	Yes	No/Unknown	Alive	142	Alive	1.16476	2.21139	1.91466	2.72339
2991157	2005	35	21-40	White	I	T1	N0	M0	Localized	Yes	Yes	Alive	138	Alive	-0.608511	-0.405734	-0.285629	-0.367709
2991173	2005	34	21-40	White	I	T2	N0	M0	Localized	Yes	Yes	Alive	142	Alive	-0.608511	-0.284814	-0.082906	-0.175537
2991469	2005	46	41-60	White	I	T1	N0	M0	Localized	Yes	Yes	Alive	138	Alive	0.071422	0.051585	-0.285629	-0.367709
2991476	2005	72	>60	White	III	T3	N1	M1	Distant	Yes	No/Unknown	Testis	0	Dead	3.20456	3.82518	2.20888	2.86901
3401062	2005	26	21-40	White	I	T2	N0	M0	Localized	Yes	No/Unknown	Alive	140	Alive	-0.608511	-0.687716	-0.082906	-0.175537
3402545	2005	28	21-40	White	III	T3	N0	M1	Distant	Yes	No/Unknown	Alive	142	Alive	1.8447	2.91055	2.15327	2.74965
3404059	2005	41	41-60	Black	I	T2	N0	M0	Localized	Yes	No/Unknown	Alive	138	Alive	0.215574	0.042548	-0.082906	-0.175537
3404067	2005	39	21-40	White	I	T1	N0	M0	Localized	Yes	No/Unknown	Alive	139	Alive	-0.608511	-0.808636	-0.285629	-0.367709
3404276	2005	36	21-40	White	III	T1	N0	M1	Distant	Yes	Yes	Testis	29	Dead	1.8447	3.07161	1.74782	2.36531
3404279	2005	56	41-60	White	I	T3	N0	M0	Regional	Yes	Yes	Alive	141	Alive	0.962056	1.15166	0.119817	0.016635
3404282	2005	35	21-40	White	I	T1	N0	M0	Localized	Yes	Yes	Alive	141	Alive	-0.608511	-0.405734	-0.285629	-0.367709
3404287	2005	27	21-40	White	I	T1	N0	M0	Localized	Yes	Yes	Alive	127	Alive	-0.608511	-0.405734	-0.285629	-0.367709
3404288	2005	40	21-40	White	I	T1	N0	M0	Localized	Yes	No/Unknown	Alive	141	Alive	-0.608511	-0.808636	-0.285629	-0.367709
3404292	2005	59	41-60	White	I	T1	N0	M0	Localized	Yes	No/Unknown	Alive	139	Alive	0.071422	-0.351317	-0.285629	-0.367709
3404297	2005	27	21-40	White	I	T1	N0	M0	Localized	Yes	No/Unknown	Alive	123	Alive	-0.608511	-0.808636	-0.285629	-0.367709
3404311	2005	26	21-40	White	I	T1	N0	M0	Localized	Yes	Yes	Alive	141	Alive	-0.608511	-0.405734	-0.285629	-0.367709
3404315	2005	40	21-40	White	I	T1	N0	M0	Localized	Yes	No/Unknown	Alive	136	Alive	-0.608511	-0.808636	-0.285629	-0.367709
3404317	2005	24	21-40	White	I	T1	N0	M0	Localized	Yes	No/Unknown	Alive	138	Alive	-0.608511	-0.808636	-0.285629	-0.367709
3406018	2005	28	21-40	White	I	T2	N0	M0	Localized	Yes	No/Unknown	Alive	45	Alive	-0.608511	-0.687716	-0.082906	-0.175537
3406989	2005	36	21-40	White	I	T1	N0	M0	Localized	Yes	Yes	Alive	140	Alive	-0.608511	-0.405734	-0.285629	-0.367709
3408137	2005	40	21-40	White	I	T1	N0	M0	Localized	Yes	Yes	Alive	135	Alive	-0.608511	-0.405734	-0.285629	-0.367709
3408144	2005	36	21-40	White	I	T2	N0	M0	Localized	Yes	No/Unknown	Alive	136	Alive	-0.608511	-0.687716	-0.082906	-0.175537
3409298	2005	31	21-40	White	I	T1	N0	M0	Localized	Yes	No/Unknown	Alive	134	Alive	-0.608511	-0.808636	-0.285629	-0.367709
3410188	2005	37	21-40	Others	I	T1	N0	M0	Localized	Yes	No/Unknown	Alive	143	Alive	-0.320207	-0.262745	-0.285629	-0.367709
3410191	2005	36	21-40	White	I	T1	N0	M0	Localized	Yes	Yes	Alive	137	Alive	-0.608511	-0.405734	-0.285629	-0.367709
3410192	2005	38	21-40	Others	III	T2	N1	M1	Distant	Yes	No/Unknown	Alive	139	Alive	2.133	3.33552	2.00616	2.67684
3410309	2005	35	21-40	White	I	T1	N0	M0	Localized	Yes	Yes	Alive	142	Alive	-0.608511	-0.405734	-0.285629	-0.367709
3410315	2005	44	41-60	White	I	T1	N0	M0	Localized	Yes	No/Unknown	Alive	139	Alive	0.071422	-0.351317	-0.285629	-0.367709
3410316	2005	31	21-40	White	I	T1	N0	M0	Localized	Yes	Yes	Alive	140	Alive	-0.608511	-0.405734	-0.285629	-0.367709
3410320	2005	45	41-60	White	I	T1	N0	M0	Localized	Yes	No/Unknown	Alive	141	Alive	0.071422	-0.351317	-0.285629	-0.367709
3410322	2005	27	21-40	White	I	T1	N0	M0	Localized	Yes	No/Unknown	Alive	141	Alive	-0.608511	-0.808636	-0.285629	-0.367709
3410327	2005	23	21-40	White	I	T2	N0	M0	Localized	Yes	No/Unknown	Alive	138	Alive	-0.608511	-0.687716	-0.082906	-0.175537
3410330	2005	51	41-60	White	I	T1	N0	M0	Localized	Yes	No/Unknown	Alive	140	Alive	0.071422	-0.351317	-0.285629	-0.367709
3410332	2005	41	41-60	White	I	T1	N0	M0	Localized	Yes	Yes	Alive	137	Alive	0.071422	0.051585	-0.285629	-0.367709
3410342	2005	46	41-60	White	I	T1	N0	M0	Localized	Yes	No/Unknown	Alive	136	Alive	0.071422	-0.351317	-0.285629	-0.367709
3411277	2005	44	41-60	White	I	T2	N0	M0	Localized	Yes	No/Unknown	Alive	133	Alive	0.071422	-0.230397	-0.082906	-0.175537
3411280	2005	44	41-60	White	I	T1	N0	M0	Localized	Yes	Yes	Alive	135	Alive	0.071422	0.051585	-0.285629	-0.367709
3411529	2005	25	21-40	White	I	T1	N0	M0	Localized	Yes	No/Unknown	Alive	136	Alive	-0.608511	-0.808636	-0.285629	-0.367709
3411532	2005	40	21-40	White	I	T1	N0	M0	Localized	Yes	Yes	Alive	135	Alive	-0.608511	-0.405734	-0.285629	-0.367709
3411535	2005	32	21-40	White	I	T1	N0	M0	Localized	Yes	No/Unknown	Alive	136	Alive	-0.608511	-0.808636	-0.285629	-0.367709
3414718	2005	33	21-40	Others	I	T1	N0	M0	Localized	Yes	Yes	Alive	137	Alive	-0.320207	0.140156	-0.285629	-0.367709
3415207	2005	39	21-40	White	I	T1	N0	M0	Localized	Yes	Yes	Alive	132	Alive	-0.608511	-0.405734	-0.285629	-0.367709
3415287	2005	40	21-40	White	I	T1	N0	M0	Localized	Yes	Yes	Alive	143	Alive	-0.608511	-0.405734	-0.285629	-0.367709
3415667	2005	37	21-40	White	I	T1	N0	M0	Localized	Yes	Yes	Alive	133	Alive	-0.608511	-0.405734	-0.285629	-0.367709
3415777	2005	34	21-40	White	I	T1	N0	M0	Localized	Yes	Yes	Alive	135	Alive	-0.608511	-0.405734	-0.285629	-0.367709
3417008	2005	39	21-40	White	I	T1	N0	M0	Localized	Yes	No/Unknown	Alive	135	Alive	-0.608511	-0.808636	-0.285629	-0.367709
3417061	2005	19	0-20	White	I	T1	N0	M0	Localized	Yes	Yes	Alive	135	Alive	-1.28845	-0.863053	-0.285629	-0.367709
3417241	2005	37	21-40	White	I	T1	N0	M0	Localized	Yes	No/Unknown	Alive	133	Alive	-0.608511	-0.808636	-0.285629	-0.367709
3417528	2005	37	21-40	White	I	T1	N0	M0	Localized	Yes	Yes	Alive	133	Alive	-0.608511	-0.405734	-0.285629	-0.367709
3417970	2005	55	41-60	White	I	T1	N0	M0	Localized	Yes	No/Unknown	State DC not available or state DC available but no COD	97	Dead	0.071422	-0.351317	-0.285629	-0.367709
3419207	2005	48	41-60	White	I	T2	N0	M0	Localized	Yes	Yes	Alive	133	Alive	0.071422	0.172504	-0.082906	-0.175537
3422409	2005	31	21-40	White	I	T1	N0	M0	Localized	Yes	No/Unknown	Alive	30	Alive	-0.608511	-0.808636	-0.285629	-0.367709
3422724	2005	41	41-60	White	I	T1	N0	M0	Localized	Yes	Yes	Alive	132	Alive	0.071422	0.051585	-0.285629	-0.367709
3423040	2005	38	21-40	White	I	T1	N0	M0	Localized	Yes	No/Unknown	Alive	134	Alive	-0.608511	-0.808636	-0.285629	-0.367709
3423115	2005	31	21-40	White	II	T2	N2	M0	Regional	Yes	No/Unknown	Alive	134	Alive	0.618093	0.555733	0.028322	0.063186
3423544	2005	33	21-40	White	I	T1	N0	M0	Localized	Yes	Yes	Alive	133	Alive	-0.608511	-0.405734	-0.285629	-0.367709
3423654	2006	25	21-40	White	I	T2	N0	M0	Localized	Yes	No/Unknown	Alive	118	Alive	-0.608511	-0.687716	-0.082906	-0.175537
3423972	2005	29	21-40	White	II	T1	N2	M0	Regional	Yes	No/Unknown	Alive	135	Alive	0.618093	0.434813	-0.174402	-0.128986
3424221	2006	26	21-40	White	I	T1	N0	M0	Localized	Yes	Yes	Alive	131	Alive	-0.608511	-0.405734	-0.285629	-0.367709
3424991	2004	21	21-40	Others	I	T1	N0	M0	Localized	Yes	No/Unknown	Alive	150	Alive	-0.320207	-0.262745	-0.285629	-0.367709
3425993	2004	22	21-40	White	I	T1	N0	M0	Localized	Yes	No/Unknown	Alive	151	Alive	-0.608511	-0.808636	-0.285629	-0.367709
3426256	2005	44	41-60	White	I	T2	N0	M0	Localized	Yes	Yes	Alive	132	Alive	0.071422	0.172504	-0.082906	-0.175537
3426540	2005	39	21-40	White	I	T1	N0	M0	Localized	Yes	Yes	Alive	133	Alive	-0.608511	-0.405734	-0.285629	-0.367709
3427001	2005	24	21-40	White	I	T1	N0	M0	Localized	Yes	No/Unknown	Alive	132	Alive	-0.608511	-0.808636	-0.285629	-0.367709
3428140	2005	43	41-60	White	I	T1	N0	M0	Localized	Yes	Yes	Alive	132	Alive	0.071422	0.051585	-0.285629	-0.367709
3428743	2006	30	21-40	Others	I	T1	N0	M0	Localized	Yes	No/Unknown	Alive	130	Alive	-0.320207	-0.262745	-0.285629	-0.367709
3428781	2006	47	41-60	White	I	T1	N0	M0	Localized	Yes	Yes	Alive	128	Alive	0.071422	0.051585	-0.285629	-0.367709
3429635	2006	26	21-40	White	I	T1	N0	M0	Localized	Yes	Yes	Alive	129	Alive	-0.608511	-0.405734	-0.285629	-0.367709
3430169	2006	43	41-60	White	I	T1	N0	M0	Localized	Yes	Yes	Alive	130	Alive	0.071422	0.051585	-0.285629	-0.367709
3432753	2004	36	21-40	White	I	T1	N0	M0	Localized	Yes	No/Unknown	Alive	147	Alive	-0.608511	-0.808636	-0.285629	-0.367709
3433828	2006	45	41-60	Black	I	T1	N0	M0	Localized	Yes	Yes	Alive	127	Alive	0.215574	0.32453	-0.285629	-0.367709
3433901	2006	50	41-60	White	II	T1	N1	M0	Regional	Yes	Yes	Alive	128	Alive	1.29803	1.29503	-0.230016	-0.248348
3434885	2006	39	21-40	Others	III	T1	N1	M1	Distant	Yes	Yes	Testis	12	Dead	2.133	3.6175	1.80343	2.48467
3435261	2006	39	21-40	Others	I	T2	N0	M0	Localized	Yes	Yes	Alive	130	Alive	-0.320207	0.261076	-0.082906	-0.175537
3435358	2006	33	21-40	White	I	T1	N0	M0	Localized	Yes	No/Unknown	Alive	45	Alive	-0.608511	-0.808636	-0.285629	-0.367709
3435837	2006	25	21-40	White	I	T1	N0	M0	Localized	Yes	Yes	Alive	80	Alive	-0.608511	-0.405734	-0.285629	-0.367709
3436080	2006	30	21-40	White	II	T1	N2	M0	Regional	Yes	No/Unknown	Alive	129	Alive	0.618093	0.434813	-0.174402	-0.128986
3436390	2006	34	21-40	White	II	T1	N3	M0	Regional	Yes	No/Unknown	Alive	129	Alive	0.618093	0.434813	-0.118788	-0.009625
3436607	2005	34	21-40	White	I	T2	N0	M0	Regional	Yes	Yes	Alive	68	Alive	0.282123	0.573417	-0.082906	-0.175537
3437456	2006	45	41-60	White	I	T1	N0	M0	Localized	Yes	Yes	Alive	124	Alive	0.071422	0.051585	-0.285629	-0.367709
3437593	2006	24	21-40	White	I	T2	N0	M0	Localized	Yes	Yes	Alive	129	Alive	-0.608511	-0.284814	-0.082906	-0.175537
3437673	2006	24	21-40	White	I	T1	N0	M0	Localized	Yes	Yes	Alive	128	Alive	-0.608511	-0.405734	-0.285629	-0.367709
3438372	2006	45	41-60	White	I	T1	N0	M0	Localized	Yes	Yes	Alive	126	Alive	0.071422	0.051585	-0.285629	-0.367709
3438621	2006	38	21-40	White	I	T1	N0	M0	Localized	Yes	No/Unknown	Alive	128	Alive	-0.608511	-0.808636	-0.285629	-0.367709
3440046	2005	45	41-60	White	I	T1	N0	M0	Localized	Yes	No/Unknown	Alive	141	Alive	0.071422	-0.351317	-0.285629	-0.367709
3440175	2006	53	41-60	White	I	T1	N0	M0	Localized	Yes	Yes	Alive	130	Alive	0.071422	0.051585	-0.285629	-0.367709
3440447	2006	50	41-60	White	I	T1	N0	M0	Localized	Yes	No/Unknown	Alive	124	Alive	0.071422	-0.351317	-0.285629	-0.367709
3440948	2006	53	41-60	White	II	T2	N2	M0	Regional	Yes	No/Unknown	Alive	124	Alive	1.29803	1.01305	0.028322	0.063186
3441473	2006	41	41-60	White	I	T2	N0	M0	Localized	Yes	Yes	Alive	127	Alive	0.071422	0.172504	-0.082906	-0.175537
3441991	2006	40	21-40	White	I	T1	N0	M0	Localized	Yes	Yes	Alive	127	Alive	-0.608511	-0.405734	-0.285629	-0.367709
3443523	2006	34	21-40	White	I	T1	N0	M0	Localized	Yes	Yes	Alive	126	Alive	-0.608511	-0.405734	-0.285629	-0.367709
3444424	2006	25	21-40	White	I	T1	N0	M0	Localized	Yes	No/Unknown	Alive	123	Alive	-0.608511	-0.808636	-0.285629	-0.367709
3446693	2006	22	21-40	White	I	T1	N0	M0	Localized	Yes	No/Unknown	Alive	78	Alive	-0.608511	-0.808636	-0.285629	-0.367709
3447058	2006	30	21-40	White	I	T1	N0	M0	Localized	Yes	No/Unknown	Alive	123	Alive	-0.608511	-0.808636	-0.285629	-0.367709
3448314	2006	27	21-40	White	I	T1	N0	M0	Localized	Yes	Yes	Alive	123	Alive	-0.608511	-0.405734	-0.285629	-0.367709
3448853	2006	33	21-40	White	I	T1	N0	M0	Localized	Yes	No/Unknown	Alive	123	Alive	-0.608511	-0.808636	-0.285629	-0.367709
3449307	2006	36	21-40	White	I	T1	N0	M0	Localized	Yes	Yes	Alive	4	Alive	-0.608511	-0.405734	-0.285629	-0.367709
3450064	2006	25	21-40	White	I	T1	N0	M0	Localized	Yes	No/Unknown	Alive	123	Alive	-0.608511	-0.808636	-0.285629	-0.367709
3450395	2005	28	21-40	White	II	T2	N2	M0	Regional	Yes	No/Unknown	Alive	133	Alive	0.618093	0.555733	0.028322	0.063186
3450827	2006	34	21-40	White	I	T1	N0	M0	Localized	Yes	No/Unknown	Alive	131	Alive	-0.608511	-0.808636	-0.285629	-0.367709
3450991	2005	21	21-40	White	II	T1	N1	M0	Regional	Yes	No/Unknown	Alive	132	Alive	0.618093	0.434813	-0.230016	-0.248348
3452171	2006	36	21-40	White	I	T1	N0	M0	Localized	Yes	No/Unknown	Alive	106	Alive	-0.608511	-0.808636	-0.285629	-0.367709
3452259	2006	24	21-40	White	I	T1	N0	M0	Localized	Yes	No/Unknown	Alive	126	Alive	-0.608511	-0.808636	-0.285629	-0.367709
3452521	2006	21	21-40	White	I	T1	N0	M0	Localized	Yes	No/Unknown	Alive	125	Alive	-0.608511	-0.808636	-0.285629	-0.367709
3452667	2005	26	21-40	White	I	T2	N0	M0	Localized	Yes	No/Unknown	Alive	141	Alive	-0.608511	-0.687716	-0.082906	-0.175537
3453413	2006	47	41-60	White	I	T1	N0	M0	Localized	Yes	Yes	Alive	129	Alive	0.071422	0.051585	-0.285629	-0.367709
3453447	2006	38	21-40	White	I	T1	N0	M0	Localized	Yes	Yes	Alive	123	Alive	-0.608511	-0.405734	-0.285629	-0.367709
3453494	2006	42	41-60	White	I	T1	N0	M0	Localized	Yes	Yes	Alive	122	Alive	0.071422	0.051585	-0.285629	-0.367709
3453546	2006	29	21-40	White	II	T2	N2	M0	Regional	Yes	No/Unknown	Alive	125	Alive	0.618093	0.555733	0.028322	0.063186
3455247	2006	27	21-40	White	I	T1	N0	M0	Localized	Yes	Yes	Alive	127	Alive	-0.608511	-0.405734	-0.285629	-0.367709
3455786	2006	33	21-40	Others	I	T1	N0	M0	Localized	Yes	No/Unknown	Alive	123	Alive	-0.320207	-0.262745	-0.285629	-0.367709
3455955	2006	37	21-40	White	I	T1	N0	M0	Localized	Yes	Yes	Alive	123	Alive	-0.608511	-0.405734	-0.285629	-0.367709
3456763	2006	36	21-40	White	II	T2	N1	M0	Distant	Yes	Yes	Alive	121	Alive	1.50873	1.81687	-0.027292	-0.056176
3456834	2006	20	0-20	White	I	T1	N0	M0	Localized	Yes	No/Unknown	Alive	121	Alive	-1.28845	-1.26595	-0.285629	-0.367709
3457894	2006	28	21-40	White	I	T2	N0	M0	Localized	Yes	Yes	Alive	120	Alive	-0.608511	-0.284814	-0.082906	-0.175537
3458039	2006	14	0-20	White	III	T3	N1	M1	Distant	Yes	No/Unknown	Alive	98	Alive	1.16476	2.45323	2.20888	2.86901
3458127	2006	48	41-60	White	I	T1	N0	M0	Localized	Yes	No/Unknown	Alive	61	Alive	0.071422	-0.351317	-0.285629	-0.367709
3460398	2006	32	21-40	Others	I	T1	N0	M0	Localized	Yes	Yes	Alive	123	Alive	-0.320207	0.140156	-0.285629	-0.367709
3460990	2006	25	21-40	White	I	T1	N0	M0	Localized	Yes	No/Unknown	Alive	122	Alive	-0.608511	-0.808636	-0.285629	-0.367709
3461443	2006	52	41-60	White	I	T1	N0	M0	Localized	Yes	No/Unknown	Alive	122	Alive	0.071422	-0.351317	-0.285629	-0.367709
3461468	2006	47	41-60	White	III	T2	N1	M0	Regional	Yes	No/Unknown	Alive	120	Alive	1.634	1.39827	-0.027292	-0.056176
3461851	2006	25	21-40	White	I	T1	N0	M0	Localized	Yes	Yes	Alive	121	Alive	-0.608511	-0.405734	-0.285629	-0.367709
3462420	2005	40	21-40	Others	I	T1	N0	M0	Localized	Yes	Yes	Alive	83	Alive	-0.320207	0.140156	-0.285629	-0.367709
3462866	2006	40	21-40	White	I	T1	N0	M0	Localized	Yes	No/Unknown	Alive	121	Alive	-0.608511	-0.808636	-0.285629	-0.367709
3465904	2005	28	21-40	White	III	T2	N2	M1	Distant	Yes	No/Unknown	Alive	132	Alive	1.8447	2.78963	2.06177	2.7962
3466959	2007	37	21-40	Others	I	T1	N0	M0	Localized	Yes	Yes	Alive	119	Alive	-0.320207	0.140156	-0.285629	-0.367709
3467195	2007	41	41-60	White	III	T1	N2	M0	Regional	Yes	Yes	Alive	116	Alive	1.634	1.68025	-0.174402	-0.128986
3467470	2007	24	21-40	White	I	T1	N0	M0	Localized	Yes	No/Unknown	Alive	115	Alive	-0.608511	-0.808636	-0.285629	-0.367709
3467593	2007	27	21-40	White	I	T1	N0	M0	Localized	Yes	No/Unknown	Alive	118	Alive	-0.608511	-0.808636	-0.285629	-0.367709
3468101	2006	33	21-40	White	I	T1	N0	M0	Localized	Yes	No/Unknown	Alive	125	Alive	-0.608511	-0.808636	-0.285629	-0.367709
3468769	2007	44	41-60	Black	I	T1	N0	M0	Localized	Yes	Yes	Alive	118	Alive	0.215574	0.32453	-0.285629	-0.367709
3470669	2006	21	21-40	White	I	T3	N0	M0	Regional	Yes	No/Unknown	Testis	35	Dead	0.282123	0.291436	0.119817	0.016635
3470832	2007	23	21-40	White	II	T1	N1	M0	Regional	Yes	No/Unknown	Alive	118	Alive	0.618093	0.434813	-0.230016	-0.248348
3470892	2007	47	41-60	White	II	T3	N2	M0	Regional	Yes	No/Unknown	Alive	112	Alive	1.29803	1.13397	0.231045	0.255358
3471390	2007	43	41-60	White	I	T1	N0	M0	Localized	Yes	Yes	Alive	116	Alive	0.071422	0.051585	-0.285629	-0.367709
3471391	2007	32	21-40	White	I	T1	N0	M0	Localized	Yes	Yes	Alive	116	Alive	-0.608511	-0.405734	-0.285629	-0.367709
3471405	2007	34	21-40	Others	I	T1	N0	M0	Regional	Yes	No/Unknown	Alive	64	Alive	0.570427	0.595487	-0.285629	-0.367709
3471414	2007	62	>60	White	I	T1	N0	M0	Localized	Yes	Yes	Alive	116	Alive	0.751355	0.508903	-0.285629	-0.367709
3471987	2007	27	21-40	White	I	T1	N0	M0	Localized	Yes	Yes	Alive	111	Alive	-0.608511	-0.405734	-0.285629	-0.367709
3472563	2007	30	21-40	Others	I	T1	N0	M0	Localized	Yes	No/Unknown	Alive	118	Alive	-0.320207	-0.262745	-0.285629	-0.367709
3472565	2007	53	41-60	White	I	T1	N0	M0	Localized	Yes	No/Unknown	Testis	22	Dead	0.071422	-0.351317	-0.285629	-0.367709
3472666	2007	45	41-60	White	I	T1	N0	M0	Localized	Yes	No/Unknown	Alive	117	Alive	0.071422	-0.351317	-0.285629	-0.367709
3473333	2007	26	21-40	White	I	T1	N0	M0	Localized	Yes	Yes	Alive	119	Alive	-0.608511	-0.405734	-0.285629	-0.367709
3473342	2006	42	41-60	White	I	T1	N0	M0	Localized	Yes	No/Unknown	Alive	123	Alive	0.071422	-0.351317	-0.285629	-0.367709
3474308	2007	31	21-40	White	III	T2	N0	M1	Distant	Yes	No/Unknown	Alive	114	Alive	1.8447	2.78963	1.95054	2.55748
3474716	2007	26	21-40	White	I	T1	N0	M0	Localized	Yes	No/Unknown	Alive	114	Alive	-0.608511	-0.808636	-0.285629	-0.367709
3474968	2007	33	21-40	Others	I	T1	N0	M0	Localized	Yes	No/Unknown	Alive	118	Alive	-0.320207	-0.262745	-0.285629	-0.367709
3475184	2007	41	41-60	White	II	T1	N1	M0	Regional	Yes	No/Unknown	Alive	116	Alive	1.29803	0.892132	-0.230016	-0.248348
3475303	2007	22	21-40	White	III	T1	N3	M0	Regional	Yes	No/Unknown	Alive	116	Alive	0.954063	0.82003	-0.118788	-0.009625
3475333	2007	35	21-40	White	I	T1	N0	M0	Localized	Yes	No/Unknown	Alive	118	Alive	-0.608511	-0.808636	-0.285629	-0.367709
3477925	2007	39	21-40	White	I	T1	N0	M0	Localized	Yes	Yes	Alive	113	Alive	-0.608511	-0.405734	-0.285629	-0.367709
3478564	2007	33	21-40	White	II	T2	N1	M0	Regional	Yes	No/Unknown	Other Cause of Death	18	Dead	0.618093	0.555733	-0.027292	-0.056176
3479066	2007	28	21-40	White	II	T2	N2	M0	Regional	Yes	Yes	Alive	113	Alive	0.618093	0.958635	0.028322	0.063186
3479668	2006	31	21-40	White	I	T1	N0	M0	Localized	Yes	No/Unknown	Alive	120	Alive	-0.608511	-0.808636	-0.285629	-0.367709
3479882	2007	34	21-40	White	I	T1	N0	M0	Localized	Yes	Yes	Alive	115	Alive	-0.608511	-0.405734	-0.285629	-0.367709
3480914	2007	66	>60	White	I	T1	N0	M0	Localized	Yes	Yes	Alive	111	Alive	0.751355	0.508903	-0.285629	-0.367709
3481058	2007	38	21-40	Others	I	T1	N0	M0	Regional	Yes	No/Unknown	Alive	116	Alive	0.570427	0.595487	-0.285629	-0.367709
3481432	2007	15	0-20	White	I	T1	N0	M0	Localized	Yes	No/Unknown	Alive	113	Alive	-1.28845	-1.26595	-0.285629	-0.367709
3481623	2007	32	21-40	White	II	T1	N1	M0	Regional	Yes	No/Unknown	Alive	29	Alive	0.618093	0.434813	-0.230016	-0.248348
3482501	2007	25	21-40	Others	III	T2	N0	M1	Distant	Yes	No/Unknown	Alive	117	Alive	2.133	3.33552	1.95054	2.55748
3482537	2007	33	21-40	White	I	T1	N0	M0	Localized	Yes	Yes	Alive	111	Alive	-0.608511	-0.405734	-0.285629	-0.367709
3482711	2007	54	41-60	White	I	T1	N0	M0	Localized	Yes	Yes	Alive	112	Alive	0.071422	0.051585	-0.285629	-0.367709
3484906	2007	31	21-40	White	I	T1	N0	M0	Localized	Yes	Yes	Alive	111	Alive	-0.608511	-0.405734	-0.285629	-0.367709
3485419	2007	51	41-60	Others	I	T2	N0	M0	Localized	Yes	Yes	Alive	110	Alive	0.359727	0.718395	-0.082906	-0.175537
3486174	2007	62	>60	White	I	T1	N0	M0	Localized	Yes	Yes	Alive	114	Alive	0.751355	0.508903	-0.285629	-0.367709
3487233	2007	43	41-60	White	III	T3	N1	M1	Distant	Yes	No/Unknown	Alive	111	Alive	2.52463	3.36787	2.20888	2.86901
3487256	2007	61	>60	White	I	T1	N0	M0	Localized	Yes	Yes	Alive	114	Alive	0.751355	0.508903	-0.285629	-0.367709
3488586	2007	38	21-40	Black	I	T1	N0	M0	Localized	Yes	Yes	Alive	110	Alive	-0.464359	-0.132789	-0.285629	-0.367709
3489206	2007	51	41-60	White	I	T1	N0	M0	Localized	Yes	No/Unknown	Alive	110	Alive	0.071422	-0.351317	-0.285629	-0.367709
3490176	2007	21	21-40	White	I	T1	N0	M0	Localized	Yes	No/Unknown	Alive	112	Alive	-0.608511	-0.808636	-0.285629	-0.367709
3490428	2007	26	21-40	White	I	T1	N0	M0	Localized	Yes	Yes	Alive	118	Alive	-0.608511	-0.405734	-0.285629	-0.367709
3490429	2007	39	21-40	White	III	T1	N1	M1	Distant	Yes	No/Unknown	Alive	111	Alive	1.8447	2.66871	1.80343	2.48467
3490585	2007	24	21-40	White	I	T1	N0	M0	Localized	Yes	No/Unknown	Alive	112	Alive	-0.608511	-0.808636	-0.285629	-0.367709
3490986	2007	39	21-40	White	I	T2	N0	M0	Localized	Yes	Yes	Alive	112	Alive	-0.608511	-0.284814	-0.082906	-0.175537
3491204	2007	47	41-60	White	I	T1	N0	M0	Localized	Yes	No/Unknown	Alive	116	Alive	0.071422	-0.351317	-0.285629	-0.367709
3491486	2007	19	0-20	White	II	T2	N1	M0	Regional	Yes	No/Unknown	Alive	113	Alive	-0.061841	0.098414	-0.027292	-0.056176
3491930	2007	27	21-40	White	I	T1	N0	M0	Localized	Yes	Yes	Alive	114	Alive	-0.608511	-0.405734	-0.285629	-0.367709
3492289	2007	29	21-40	White	I	T2	N0	M0	Localized	Yes	No/Unknown	Alive	116	Alive	-0.608511	-0.687716	-0.082906	-0.175537
3493093	2007	53	41-60	White	II	T1	N2	M0	Regional	Yes	Yes	Testis	36	Dead	1.29803	1.29503	-0.174402	-0.128986
3493515	2007	30	21-40	White	I	T1	N0	M0	Localized	Yes	No/Unknown	Alive	110	Alive	-0.608511	-0.808636	-0.285629	-0.367709
3494180	2007	25	21-40	White	I	T2	N0	M0	Localized	Yes	No/Unknown	Alive	111	Alive	-0.608511	-0.687716	-0.082906	-0.175537
3494556	2007	32	21-40	Others	I	T1	N0	M0	Localized	Yes	No/Unknown	Alive	119	Alive	-0.320207	-0.262745	-0.285629	-0.367709
3495274	2007	44	41-60	Black	I	T1	N0	M0	Localized	Yes	Yes	Alive	109	Alive	0.215574	0.32453	-0.285629	-0.367709
3495292	2007	31	21-40	Others	I	T1	N0	M0	Localized	Yes	No/Unknown	Alive	114	Alive	-0.320207	-0.262745	-0.285629	-0.367709
3496280	2007	39	21-40	White	II	T2	N1	M0	Regional	Yes	No/Unknown	Alive	119	Alive	0.618093	0.555733	-0.027292	-0.056176
3496646	2007	31	21-40	Others	I	T1	N0	M0	Localized	Yes	No/Unknown	Alive	110	Alive	-0.320207	-0.262745	-0.285629	-0.367709
3496653	2007	25	21-40	White	II	T1	N1	M0	Regional	Yes	No/Unknown	Alive	111	Alive	0.618093	0.434813	-0.230016	-0.248348
3497343	2008	32	21-40	White	II	T2	N3	M0	Regional	Yes	No/Unknown	Alive	107	Alive	0.618093	0.555733	0.083935	0.182548
3497541	2007	29	21-40	White	II	T1	N1	M0	Regional	Yes	No/Unknown	Alive	110	Alive	0.618093	0.434813	-0.230016	-0.248348
3497784	2008	22	21-40	White	III	T2	N0	M1	Distant	Yes	No/Unknown	Accidents and Adverse Effects	41	Dead	1.8447	2.78963	1.95054	2.55748
3498499	2007	32	21-40	White	I	T1	N0	M0	Localized	Yes	No/Unknown	Alive	117	Alive	-0.608511	-0.808636	-0.285629	-0.367709
3500146	2007	22	21-40	White	I	T1	N0	M0	Localized	Yes	No/Unknown	Alive	113	Alive	-0.608511	-0.808636	-0.285629	-0.367709
3500564	2007	20	0-20	White	III	T1	N2	M0	Regional	Yes	No/Unknown	Alive	115	Alive	0.274129	0.362712	-0.174402	-0.128986
3500632	2008	33	21-40	White	I	T1	N0	M0	Localized	Yes	Yes	Alive	107	Alive	-0.608511	-0.405734	-0.285629	-0.367709
3501564	2008	24	21-40	White	II	T1	N2	M0	Regional	Yes	No/Unknown	Alive	106	Alive	0.618093	0.434813	-0.174402	-0.128986
3501785	2008	37	21-40	White	I	T1	N0	M0	Localized	Yes	Yes	Alive	107	Alive	-0.608511	-0.405734	-0.285629	-0.367709
3502415	2007	24	21-40	White	I	T1	N0	M0	Localized	Yes	No/Unknown	Alive	108	Alive	-0.608511	-0.808636	-0.285629	-0.367709
3502467	2008	29	21-40	White	I	T1	N0	M0	Localized	Yes	Yes	Alive	106	Alive	-0.608511	-0.405734	-0.285629	-0.367709
3503190	2007	31	21-40	White	I	T1	N0	M0	Localized	Yes	No/Unknown	Alive	118	Alive	-0.608511	-0.808636	-0.285629	-0.367709
3503348	2008	26	21-40	Others	I	T2	N0	M0	Localized	Yes	Yes	Alive	107	Alive	-0.320207	0.261076	-0.082906	-0.175537
3504255	2008	28	21-40	White	II	T2	N1	M0	Regional	Yes	No/Unknown	Alive	104	Alive	0.618093	0.555733	-0.027292	-0.056176
3504350	2008	27	21-40	White	III	T2	N3	M0	Regional	Yes	No/Unknown	Alive	107	Alive	0.954063	0.94095	0.083935	0.182548
3504959	2008	26	21-40	White	II	T2	N2	M0	Regional	Yes	No/Unknown	Alive	105	Alive	0.618093	0.555733	0.028322	0.063186
3506326	2008	27	21-40	Others	I	T1	N0	M0	Localized	Yes	No/Unknown	Alive	105	Alive	-0.320207	-0.262745	-0.285629	-0.367709
3507450	2008	35	21-40	White	I	T1	N0	M0	Localized	Yes	No/Unknown	Alive	107	Alive	-0.608511	-0.808636	-0.285629	-0.367709
3507594	2008	25	21-40	White	III	T2	N1	M0	Regional	Yes	No/Unknown	Alive	105	Alive	0.954063	0.94095	-0.027292	-0.056176
3508033	2008	33	21-40	White	I	T2	N0	M0	Regional	Yes	Yes	Alive	39	Alive	0.282123	0.573417	-0.082906	-0.175537
3509557	2008	28	21-40	White	I	T1	N0	M0	Localized	Yes	No/Unknown	Alive	15	Alive	-0.608511	-0.808636	-0.285629	-0.367709
3509809	2008	46	41-60	White	I	T2	N0	M0	Localized	Yes	Yes	Alive	106	Alive	0.071422	0.172504	-0.082906	-0.175537
3509824	2008	38	21-40	White	I	T1	N0	M0	Regional	Yes	Yes	Alive	47	Alive	0.282123	0.452498	-0.285629	-0.367709
3510070	2008	58	41-60	White	III	T1	N0	M1	Distant	Yes	No/Unknown	Alive	104	Alive	2.52463	3.12603	1.74782	2.36531
3510910	2008	33	21-40	White	I	T1	N0	M0	Localized	Yes	No/Unknown	Alive	106	Alive	-0.608511	-0.808636	-0.285629	-0.367709
3512315	2008	34	21-40	White	II	T1	N1	M0	Regional	Yes	No/Unknown	Alive	106	Alive	0.618093	0.434813	-0.230016	-0.248348
3512318	2008	44	41-60	White	I	T1	N0	M0	Localized	Yes	No/Unknown	Alive	83	Alive	0.071422	-0.351317	-0.285629	-0.367709
3512365	2008	35	21-40	White	I	T1	N0	M0	Localized	Yes	No/Unknown	Alive	106	Alive	-0.608511	-0.808636	-0.285629	-0.367709
3512561	2008	32	21-40	Black	I	T1	N0	M0	Localized	Yes	No/Unknown	Alive	101	Alive	-0.464359	-0.53569	-0.285629	-0.367709
3512617	2008	43	41-60	White	I	T1	N0	M0	Localized	Yes	No/Unknown	Alive	105	Alive	0.071422	-0.351317	-0.285629	-0.367709
3512720	2008	38	21-40	White	I	T1	N0	M0	Localized	Yes	Yes	Alive	103	Alive	-0.608511	-0.405734	-0.285629	-0.367709
3514049	2008	29	21-40	White	I	T1	N0	M0	Localized	Yes	No/Unknown	Alive	103	Alive	-0.608511	-0.808636	-0.285629	-0.367709
3514217	2008	68	>60	White	I	T2	N0	M0	Localized	Yes	Yes	Alive	103	Alive	0.751355	0.629823	-0.082906	-0.175537
3514830	2007	24	21-40	Others	II	T1	N2	M0	Regional	Yes	No/Unknown	Alive	118	Alive	0.906397	0.980704	-0.174402	-0.128986
3515348	2008	36	21-40	White	III	T2	N2	M0	Regional	Yes	No/Unknown	Alive	21	Alive	0.954063	0.94095	0.028322	0.063186
3515351	2008	27	21-40	White	I	T1	N0	M0	Localized	Yes	No/Unknown	Alive	102	Alive	-0.608511	-0.808636	-0.285629	-0.367709
3515585	2008	45	41-60	White	I	T1	N0	M0	Localized	Yes	No/Unknown	Alive	102	Alive	0.071422	-0.351317	-0.285629	-0.367709
3516995	2008	28	21-40	White	I	T2	N0	M0	Localized	Yes	No/Unknown	Alive	104	Alive	-0.608511	-0.687716	-0.082906	-0.175537
3517054	2008	51	41-60	White	I	T1	N0	M0	Localized	Yes	No/Unknown	Alive	102	Alive	0.071422	-0.351317	-0.285629	-0.367709
3517755	2008	20	0-20	Others	I	T3	N0	M0	Regional	Yes	No/Unknown	Alive	102	Alive	-0.109506	0.380007	0.119817	0.016635
3518402	2008	30	21-40	White	I	T1	N0	M0	Localized	Yes	No/Unknown	Alive	100	Alive	-0.608511	-0.808636	-0.285629	-0.367709
3519059	2008	32	21-40	White	I	T2	N0	M0	Localized	Yes	No/Unknown	Alive	100	Alive	-0.608511	-0.687716	-0.082906	-0.175537
3519392	2008	48	41-60	White	II	T1	N1	M0	Regional	Yes	Yes	Alive	104	Alive	1.29803	1.29503	-0.230016	-0.248348
3520083	2008	43	41-60	White	I	T2	N0	M0	Localized	Yes	No/Unknown	Alive	102	Alive	0.071422	-0.230397	-0.082906	-0.175537
3520985	2008	36	21-40	White	I	T2	N0	M0	Localized	Yes	No/Unknown	Alive	87	Alive	-0.608511	-0.687716	-0.082906	-0.175537
3523224	2007	26	21-40	White	I	T1	N0	M0	Localized	Yes	No/Unknown	Testis	51	Dead	-0.608511	-0.808636	-0.285629	-0.367709
3523459	2008	43	41-60	Black	I	T3	N0	M0	Regional	Yes	Yes	Alive	101	Alive	1.10621	1.4246	0.119817	0.016635
3524236	2008	26	21-40	White	I	T1	N0	M0	Localized	Yes	Yes	Alive	99	Alive	-0.608511	-0.405734	-0.285629	-0.367709
3525325	2008	33	21-40	White	I	T1	N0	M0	Localized	Yes	No/Unknown	Alive	99	Alive	-0.608511	-0.808636	-0.285629	-0.367709
3525409	2008	15	0-20	White	I	T1	N0	M0	Localized	Yes	No/Unknown	Alive	33	Alive	-1.28845	-1.26595	-0.285629	-0.367709
3525545	2008	30	21-40	White	I	T1	N0	M0	Localized	Yes	No/Unknown	Alive	98	Alive	-0.608511	-0.808636	-0.285629	-0.367709
3526125	2008	42	41-60	White	I	T2	N0	M0	Localized	Yes	No/Unknown	Alive	98	Alive	0.071422	-0.230397	-0.082906	-0.175537
3526249	2008	22	21-40	Black	I	T2	N0	M0	Localized	Yes	No/Unknown	Alive	97	Alive	-0.464359	-0.414771	-0.082906	-0.175537
3526519	2008	39	21-40	White	II	T1	N1	M0	Regional	Yes	No/Unknown	Alive	102	Alive	0.618093	0.434813	-0.230016	-0.248348
3527091	2008	28	21-40	White	I	T2	N0	M0	Localized	Yes	Yes	Alive	98	Alive	-0.608511	-0.284814	-0.082906	-0.175537
3527983	2008	56	41-60	White	I	T1	N0	M0	Localized	Yes	No/Unknown	Alive	99	Alive	0.071422	-0.351317	-0.285629	-0.367709
3528103	2008	71	>60	White	II	T3	N1	M0	Regional	Yes	Yes	Other Cause of Death	37	Dead	1.97796	1.99419	0.175431	0.135997
3528299	2008	21	21-40	White	I	T2	N0	M0	Localized	Yes	No/Unknown	Alive	50	Alive	-0.608511	-0.687716	-0.082906	-0.175537
3528358	2008	43	41-60	White	I	T1	N0	M0	Localized	Yes	No/Unknown	Alive	97	Alive	0.071422	-0.351317	-0.285629	-0.367709
3532657	2008	47	41-60	White	III	T2	N0	M1	Distant	Yes	No/Unknown	Alive	96	Alive	2.52463	3.24695	1.95054	2.55748
3534224	2008	43	41-60	White	I	T1	N0	M0	Localized	Yes	No/Unknown	Alive	96	Alive	0.071422	-0.351317	-0.285629	-0.367709
3534227	2008	53	41-60	White	I	T2	N0	M0	Localized	Yes	Yes	Alive	97	Alive	0.071422	0.172504	-0.082906	-0.175537
3534235	2008	34	21-40	White	I	T1	N0	M0	Localized	Yes	No/Unknown	Alive	98	Alive	-0.608511	-0.808636	-0.285629	-0.367709
3534462	2008	46	41-60	White	I	T2	N0	M0	Localized	Yes	No/Unknown	Alive	96	Alive	0.071422	-0.230397	-0.082906	-0.175537
3536831	2008	11	0-20	White	II	T2	N1	M0	Regional	Yes	No/Unknown	Alive	99	Alive	-0.061841	0.098414	-0.027292	-0.056176
3537353	2007	43	41-60	White	I	T1	N0	M0	Localized	Yes	No/Unknown	Alive	117	Alive	0.071422	-0.351317	-0.285629	-0.367709
3537773	2008	23	21-40	White	I	T1	N0	M0	Localized	Yes	No/Unknown	Alive	66	Alive	-0.608511	-0.808636	-0.285629	-0.367709
3538553	2008	25	21-40	White	I	T1	N0	M0	Localized	Yes	No/Unknown	Alive	7	Alive	-0.608511	-0.808636	-0.285629	-0.367709
3538771	2008	24	21-40	White	I	T2	N0	M0	Localized	Yes	No/Unknown	Alive	96	Alive	-0.608511	-0.687716	-0.082906	-0.175537
3539100	2009	20	0-20	Others	I	T1	N0	M0	Localized	Yes	No/Unknown	Alive	93	Alive	-1.00014	-0.720064	-0.285629	-0.367709
3540545	2008	26	21-40	White	I	T2	N0	M0	Localized	Yes	No/Unknown	Alive	96	Alive	-0.608511	-0.687716	-0.082906	-0.175537
3540923	2008	16	0-20	White	I	T1	N0	M0	Localized	Yes	Yes	Alive	99	Alive	-1.28845	-0.863053	-0.285629	-0.367709
3540986	2008	45	41-60	White	I	T1	N0	M0	Localized	Yes	No/Unknown	Alive	98	Alive	0.071422	-0.351317	-0.285629	-0.367709
3541827	2009	51	41-60	White	I	T1	N0	M0	Localized	Yes	No/Unknown	Alive	92	Alive	0.071422	-0.351317	-0.285629	-0.367709
3541978	2008	30	21-40	White	I	T1	N0	M0	Localized	Yes	No/Unknown	Alive	96	Alive	-0.608511	-0.808636	-0.285629	-0.367709
3542064	2009	42	41-60	White	I	T2	N0	M0	Localized	Yes	Yes	Alive	94	Alive	0.071422	0.172504	-0.082906	-0.175537
3542181	2009	18	0-20	White	I	T1	N0	M0	Localized	Yes	No/Unknown	Alive	95	Alive	-1.28845	-1.26595	-0.285629	-0.367709
3542266	2009	29	21-40	Others	III	T2	N0	M1	Distant	Yes	No/Unknown	Alive	94	Alive	2.133	3.33552	1.95054	2.55748
3542351	2009	47	41-60	White	III	T1	N3	M1	Distant	Yes	No/Unknown	Alive	95	Alive	2.52463	3.12603	1.91466	2.72339
3542403	2009	35	21-40	White	I	T1	N0	M0	Localized	Yes	No/Unknown	Alive	92	Alive	-0.608511	-0.808636	-0.285629	-0.367709
3543254	2009	45	41-60	White	I	T1	N0	M0	Localized	Yes	Yes	Alive	94	Alive	0.071422	0.051585	-0.285629	-0.367709
3543922	2008	43	41-60	White	II	T2	N1	M0	Regional	Yes	No/Unknown	Alive	100	Alive	1.29803	1.01305	-0.027292	-0.056176
3544563	2009	28	21-40	White	I	T1	N0	M0	Localized	Yes	No/Unknown	Alive	92	Alive	-0.608511	-0.808636	-0.285629	-0.367709
3545187	2007	37	21-40	White	I	T1	N0	M0	Localized	Yes	No/Unknown	Alive	112	Alive	-0.608511	-0.808636	-0.285629	-0.367709
3545243	2008	39	21-40	White	I	T1	N0	M0	Localized	Yes	Yes	Alive	99	Alive	-0.608511	-0.405734	-0.285629	-0.367709
3545273	2007	51	41-60	Black	III	T1	N2	M0	Regional	Yes	No/Unknown	Alive	97	Alive	1.77815	1.55029	-0.174402	-0.128986
3545702	2009	22	21-40	White	III	T2	N1	M0	Regional	Yes	No/Unknown	Alive	93	Alive	0.954063	0.94095	-0.027292	-0.056176
3546738	2009	33	21-40	White	I	T1	N0	M0	Localized	Yes	No/Unknown	Alive	93	Alive	-0.608511	-0.808636	-0.285629	-0.367709
3546799	2009	30	21-40	Black	I	T2	N0	M0	Localized	Yes	Yes	Alive	92	Alive	-0.464359	-0.011869	-0.082906	-0.175537
3547778	2009	47	41-60	White	I	T1	N0	M0	Localized	Yes	Yes	Alive	94	Alive	0.071422	0.051585	-0.285629	-0.367709
3548012	2009	25	21-40	White	I	T1	N0	M0	Localized	Yes	No/Unknown	Alive	93	Alive	-0.608511	-0.808636	-0.285629	-0.367709
3548165	2009	30	21-40	White	I	T1	N0	M0	Localized	Yes	No/Unknown	Alive	94	Alive	-0.608511	-0.808636	-0.285629	-0.367709
3548174	2009	15	0-20	White	I	T1	N0	M0	Localized	Yes	No/Unknown	Alive	95	Alive	-1.28845	-1.26595	-0.285629	-0.367709
3549950	2009	27	21-40	Others	III	T1	N0	M1	Distant	Yes	No/Unknown	Testis	23	Dead	2.133	3.2146	1.74782	2.36531
3552941	2009	48	41-60	White	I	T1	N0	M0	Localized	Yes	Yes	Alive	92	Alive	0.071422	0.051585	-0.285629	-0.367709
3553249	2009	52	41-60	White	I	T1	N0	M0	Localized	Yes	No/Unknown	Alive	89	Alive	0.071422	-0.351317	-0.285629	-0.367709
3553257	2009	26	21-40	White	III	T1	N2	M1	Distant	Yes	No/Unknown	Alive	54	Alive	1.8447	2.66871	1.85905	2.60403
3553468	2009	21	21-40	White	I	T2	N0	M0	Regional	Yes	No/Unknown	Alive	90	Alive	0.282123	0.170516	-0.082906	-0.175537
3554643	2009	24	21-40	White	II	T2	N1	M0	Regional	Yes	No/Unknown	Alive	90	Alive	0.618093	0.555733	-0.027292	-0.056176
3555124	2009	29	21-40	White	I	T2	N0	M0	Localized	Yes	Yes	Alive	91	Alive	-0.608511	-0.284814	-0.082906	-0.175537
3555166	2009	26	21-40	White	I	T1	N0	M0	Localized	Yes	No/Unknown	Alive	82	Alive	-0.608511	-0.808636	-0.285629	-0.367709
3555505	2009	29	21-40	White	I	T1	N0	M0	Localized	Yes	No/Unknown	Alive	90	Alive	-0.608511	-0.808636	-0.285629	-0.367709
3555594	2009	42	41-60	White	I	T1	N0	M0	Localized	Yes	No/Unknown	Alive	91	Alive	0.071422	-0.351317	-0.285629	-0.367709
3556324	2009	18	0-20	White	I	T1	N0	M0	Localized	Yes	Yes	Alive	77	Alive	-1.28845	-0.863053	-0.285629	-0.367709
3556875	2009	26	21-40	Others	I	T1	N0	M0	Localized	Yes	Yes	Alive	93	Alive	-0.320207	0.140156	-0.285629	-0.367709
3557007	2009	29	21-40	White	I	T1	N0	M0	Localized	Yes	No/Unknown	Alive	91	Alive	-0.608511	-0.808636	-0.285629	-0.367709
3557259	2009	60	41-60	Others	I	T1	N0	M0	Localized	Yes	No/Unknown	Alive	92	Alive	0.359727	0.194574	-0.285629	-0.367709
3559921	2009	28	21-40	White	III	T1	N1	M1	Distant	Yes	No/Unknown	Alive	86	Alive	1.8447	2.66871	1.80343	2.48467
3560377	2009	35	21-40	White	I	T1	N0	M0	Localized	Yes	Yes	Alive	89	Alive	-0.608511	-0.405734	-0.285629	-0.367709
3561676	2009	20	0-20	White	II	T1	N2	M0	Regional	Yes	No/Unknown	Alive	88	Alive	-0.061841	-0.022506	-0.174402	-0.128986
3561750	2009	25	21-40	White	I	T2	N0	M0	Regional	Yes	No/Unknown	Alive	88	Alive	0.282123	0.170516	-0.082906	-0.175537
3561968	2009	35	21-40	Others	I	T1	N0	M0	Localized	Yes	Yes	Alive	89	Alive	-0.320207	0.140156	-0.285629	-0.367709
3561974	2009	42	41-60	White	II	T1	N1	M0	Regional	Yes	Yes	Alive	89	Alive	1.29803	1.29503	-0.230016	-0.248348
3564037	2008	30	21-40	White	I	T1	N0	M0	Localized	Yes	No/Unknown	Alive	99	Alive	-0.608511	-0.808636	-0.285629	-0.367709
3564183	2008	25	21-40	White	III	T2	N1	M1	Distant	Yes	No/Unknown	Alive	96	Alive	1.8447	2.78963	2.00616	2.67684
3564346	2008	37	21-40	Black	III	T1	N1	M1	Distant	Yes	No/Unknown	Alive	104	Alive	1.98885	2.94165	1.80343	2.48467
3564517	2009	40	21-40	White	I	T2	N0	M0	Localized	Yes	No/Unknown	Alive	85	Alive	-0.608511	-0.687716	-0.082906	-0.175537
3565459	2009	22	21-40	White	II	T1	N1	M0	Regional	Yes	No/Unknown	Alive	87	Alive	0.618093	0.434813	-0.230016	-0.248348
3968052	2009	28	21-40	White	I	T1	N0	M0	Localized	Yes	No/Unknown	Alive	69	Alive	-0.608511	-0.808636	-0.285629	-0.367709
3968777	2009	32	21-40	White	I	T1	N0	M0	Localized	Yes	No/Unknown	Alive	88	Alive	-0.608511	-0.808636	-0.285629	-0.367709
3970337	2009	20	0-20	Others	I	T2	N0	M0	Localized	Yes	No/Unknown	Alive	5	Alive	-1.00014	-0.599144	-0.082906	-0.175537
3970680	2009	28	21-40	Others	I	T1	N0	M0	Localized	Yes	No/Unknown	Alive	86	Alive	-0.320207	-0.262745	-0.285629	-0.367709
3971106	2009	25	21-40	White	III	T2	N2	M1	Distant	Yes	No/Unknown	Testis	4	Dead	1.8447	2.78963	2.06177	2.7962
3971222	2009	19	0-20	White	II	T2	N2	M0	Regional	Yes	No/Unknown	Alive	86	Alive	-0.061841	0.098414	0.028322	0.063186
3971272	2009	33	21-40	White	I	T1	N0	M0	Localized	Yes	No/Unknown	Alive	85	Alive	-0.608511	-0.808636	-0.285629	-0.367709
3971831	2009	24	21-40	Others	III	T1	N1	M1	Distant	Yes	No/Unknown	Testis	17	Dead	2.133	3.2146	1.80343	2.48467
3972304	2009	40	21-40	Black	I	T1	N0	M0	Regional	Yes	Yes	Alive	88	Alive	0.426275	0.725443	-0.285629	-0.367709
3972591	2009	43	41-60	White	I	T1	N0	M0	Localized	Yes	No/Unknown	Alive	84	Alive	0.071422	-0.351317	-0.285629	-0.367709
3972802	2009	59	41-60	Black	I	T2	N0	M0	Localized	Yes	Yes	Alive	87	Alive	0.215574	0.44545	-0.082906	-0.175537
3972908	2009	27	21-40	White	I	T1	N0	M0	Localized	Yes	No/Unknown	Alive	0	Alive	-0.608511	-0.808636	-0.285629	-0.367709
3974546	2009	42	41-60	White	III	T1	N3	M1	Distant	Yes	No/Unknown	Alive	84	Alive	2.52463	3.12603	1.91466	2.72339
3974975	2009	34	21-40	White	I	T1	N0	M0	Localized	Yes	No/Unknown	Alive	87	Alive	-0.608511	-0.808636	-0.285629	-0.367709
3975609	2009	30	21-40	White	I	T1	N0	M0	Localized	Yes	No/Unknown	Alive	84	Alive	-0.608511	-0.808636	-0.285629	-0.367709
3979696	2009	27	21-40	Others	I	T1	N0	M0	Regional	Yes	No/Unknown	Alive	89	Alive	0.570427	0.595487	-0.285629	-0.367709
3979985	2009	41	41-60	White	I	T1	N0	M0	Localized	Yes	No/Unknown	Alive	94	Alive	0.071422	-0.351317	-0.285629	-0.367709
3979987	2009	42	41-60	White	I	T1	N0	M0	Localized	Yes	No/Unknown	Alive	94	Alive	0.071422	-0.351317	-0.285629	-0.367709
3980752	2009	27	21-40	White	I	T1	N0	M0	Localized	Yes	No/Unknown	Alive	77	Alive	-0.608511	-0.808636	-0.285629	-0.367709
3981251	2009	31	21-40	White	I	T2	N0	M0	Localized	Yes	No/Unknown	Alive	8	Alive	-0.608511	-0.687716	-0.082906	-0.175537
3981929	2009	44	41-60	Others	I	T1	N0	M0	Localized	Yes	No/Unknown	Alive	87	Alive	0.359727	0.194574	-0.285629	-0.367709
3982050	2009	48	41-60	White	III	T1	N3	M1	Regional	Yes	No/Unknown	Alive	84	Alive	1.634	2.2678	1.91466	2.72339
3982088	2009	39	21-40	White	I	T1	N0	M0	Localized	Yes	No/Unknown	Alive	85	Alive	-0.608511	-0.808636	-0.285629	-0.367709
3982437	2008	62	>60	White	I	T1	N0	M0	Localized	Yes	No/Unknown	Alive	98	Alive	0.751355	0.106002	-0.285629	-0.367709
3982552	2009	29	21-40	Others	I	T2	N0	M0	Localized	Yes	No/Unknown	Alive	93	Alive	-0.320207	-0.141825	-0.082906	-0.175537
3982555	2009	53	41-60	White	I	T1	N0	M0	Localized	Yes	No/Unknown	Alive	95	Alive	0.071422	-0.351317	-0.285629	-0.367709
3982924	2008	29	21-40	White	I	T1	N0	M0	Localized	Yes	No/Unknown	Alive	100	Alive	-0.608511	-0.808636	-0.285629	-0.367709
3983194	2009	48	41-60	White	I	T1	N0	M0	Localized	Yes	No/Unknown	Alive	87	Alive	0.071422	-0.351317	-0.285629	-0.367709
3983201	2009	44	41-60	White	I	T1	N0	M0	Localized	Yes	No/Unknown	Alive	87	Alive	0.071422	-0.351317	-0.285629	-0.367709
3983452	2009	34	21-40	White	I	T2	N0	M0	Regional	Yes	No/Unknown	Alive	85	Alive	0.282123	0.170516	-0.082906	-0.175537
3983524	2009	32	21-40	White	III	T2	N0	M1	Distant	Yes	No/Unknown	Alive	87	Alive	1.8447	2.78963	1.95054	2.55748
3983849	2009	22	21-40	White	I	T1	N0	M0	Localized	Yes	No/Unknown	Alive	87	Alive	-0.608511	-0.808636	-0.285629	-0.367709
3984339	2010	49	41-60	Others	I	T3	N0	M0	Regional	Yes	No/Unknown	Alive	82	Alive	1.25036	1.29465	0.119817	0.016635
3987177	2010	0	0-20	Others	I	T1	N0	M0	Localized	Yes	No/Unknown	Alive	82	Alive	-1.00014	-0.720064	-0.285629	-0.367709
3987574	2010	28	21-40	White	I	T2	N0	M0	Localized	Yes	No/Unknown	Alive	79	Alive	-0.608511	-0.687716	-0.082906	-0.175537
3988340	2010	39	21-40	White	I	T1	N0	M0	Localized	Yes	No/Unknown	Alive	77	Alive	-0.608511	-0.808636	-0.285629	-0.367709
3989565	2010	29	21-40	Others	III	T2	N1	M1	Distant	Yes	No/Unknown	Testis	40	Dead	2.133	3.33552	2.00616	2.67684
3989631	2010	35	21-40	White	I	T1	N0	M0	Localized	Yes	No/Unknown	Alive	80	Alive	-0.608511	-0.808636	-0.285629	-0.367709
3989932	2010	38	21-40	White	I	T1	N0	M0	Localized	Yes	No/Unknown	Alive	81	Alive	-0.608511	-0.808636	-0.285629	-0.367709
3989938	2010	27	21-40	White	I	T1	N0	M0	Localized	Yes	No/Unknown	Alive	78	Alive	-0.608511	-0.808636	-0.285629	-0.367709
3990982	2010	18	0-20	White	III	T3	N1	M1	Distant	Yes	No/Unknown	Alive	79	Alive	1.16476	2.45323	2.20888	2.86901
3991809	2010	48	41-60	White	I	T2	N0	M0	Localized	Yes	No/Unknown	Alive	83	Alive	0.071422	-0.230397	-0.082906	-0.175537
3993517	2010	36	21-40	White	I	T1	N0	M0	Localized	Yes	Yes	Alive	77	Alive	-0.608511	-0.405734	-0.285629	-0.367709
3993589	2010	30	21-40	White	I	T1	N0	M0	Localized	Yes	No/Unknown	Alive	77	Alive	-0.608511	-0.808636	-0.285629	-0.367709
3993819	2010	43	41-60	White	I	T1	N0	M0	Localized	Yes	No/Unknown	Alive	75	Alive	0.071422	-0.351317	-0.285629	-0.367709
3994894	2010	16	0-20	White	II	T2	N1	M0	Regional	Yes	No/Unknown	Alive	77	Alive	-0.061841	0.098414	-0.027292	-0.056176
3994949	2009	47	41-60	White	I	T1	N0	M0	Localized	Yes	Yes	Alive	95	Alive	0.071422	0.051585	-0.285629	-0.367709
3995131	2010	41	41-60	White	I	T2	N0	M0	Localized	Yes	No/Unknown	Alive	78	Alive	0.071422	-0.230397	-0.082906	-0.175537
3995189	2010	34	21-40	White	I	T1	N0	M0	Localized	Yes	Yes	Alive	83	Alive	-0.608511	-0.405734	-0.285629	-0.367709
3995447	2010	35	21-40	White	I	T1	N0	M0	Localized	Yes	No/Unknown	Alive	83	Alive	-0.608511	-0.808636	-0.285629	-0.367709
3996337	2010	41	41-60	White	II	T1	N1	M0	Regional	Yes	Yes	Alive	81	Alive	1.29803	1.29503	-0.230016	-0.248348
3997552	2010	33	21-40	White	I	T1	N0	M0	Localized	Yes	No/Unknown	Alive	77	Alive	-0.608511	-0.808636	-0.285629	-0.367709
3998075	2010	61	>60	White	I	T1	N0	M0	Localized	Yes	No/Unknown	Alive	77	Alive	0.751355	0.106002	-0.285629	-0.367709
3999550	2010	48	41-60	White	II	T1	N2	M0	Regional	Yes	No/Unknown	Alive	74	Alive	1.29803	0.892132	-0.174402	-0.128986
3999617	2010	31	21-40	White	I	T1	N0	M0	Localized	Yes	No/Unknown	Alive	34	Alive	-0.608511	-0.808636	-0.285629	-0.367709
3999622	2010	34	21-40	Others	I	T1	N0	M0	Localized	Yes	No/Unknown	Alive	81	Alive	-0.320207	-0.262745	-0.285629	-0.367709
3999981	2010	26	21-40	White	I	T1	N0	M0	Localized	Yes	No/Unknown	Alive	76	Alive	-0.608511	-0.808636	-0.285629	-0.367709
4000576	2010	23	21-40	White	I	T2	N0	M0	Localized	Yes	No/Unknown	Alive	76	Alive	-0.608511	-0.687716	-0.082906	-0.175537
4001895	2010	37	21-40	White	I	T1	N0	M0	Localized	Yes	No/Unknown	Alive	75	Alive	-0.608511	-0.808636	-0.285629	-0.367709
4002158	2010	46	41-60	White	III	T2	N1	M1	Distant	Yes	No/Unknown	Testis	38	Dead	2.52463	3.24695	2.00616	2.67684
4002804	2010	26	21-40	White	I	T1	N0	M0	Localized	Yes	No/Unknown	Alive	75	Alive	-0.608511	-0.808636	-0.285629	-0.367709
4003338	2010	28	21-40	White	II	T3	N3	M0	Regional	Yes	No/Unknown	Alive	78	Alive	0.618093	0.676653	0.286659	0.37472
4003740	2010	30	21-40	White	I	T2	N0	M0	Localized	Yes	No/Unknown	Alive	79	Alive	-0.608511	-0.687716	-0.082906	-0.175537
4003745	2010	20	0-20	Black	I	T2	N0	M0	Localized	Yes	No/Unknown	Alive	79	Alive	-1.14429	-0.87209	-0.082906	-0.175537
4003914	2010	29	21-40	White	III	T1	N2	M1	Distant	Yes	No/Unknown	Alive	72	Alive	1.8447	2.66871	1.85905	2.60403
4004360	2010	42	41-60	Others	I	T1	N0	M0	Localized	Yes	Yes	Alive	78	Alive	0.359727	0.597475	-0.285629	-0.367709
4004486	2010	49	41-60	White	I	T4	N0	M0	Regional	Yes	Yes	Alive	80	Alive	0.962056	1.27258	0.322541	0.208807
4004487	2010	25	21-40	White	I	T1	N0	M0	Localized	Yes	No/Unknown	Alive	79	Alive	-0.608511	-0.808636	-0.285629	-0.367709
4005257	2010	23	21-40	Others	I	T1	N0	M0	Localized	Yes	No/Unknown	Alive	76	Alive	-0.320207	-0.262745	-0.285629	-0.367709
4005294	2010	30	21-40	White	I	T2	N0	M0	Localized	Yes	No/Unknown	Alive	76	Alive	-0.608511	-0.687716	-0.082906	-0.175537
4006154	2010	37	21-40	White	I	T1	N0	M0	Localized	Yes	No/Unknown	Alive	77	Alive	-0.608511	-0.808636	-0.285629	-0.367709
4007136	2010	29	21-40	Others	I	T1	N0	M0	Localized	Yes	No/Unknown	Alive	24	Alive	-0.320207	-0.262745	-0.285629	-0.367709
4007373	2010	19	0-20	White	I	T1	N0	M0	Localized	Yes	Yes	Alive	74	Alive	-1.28845	-0.863053	-0.285629	-0.367709
4007826	2010	39	21-40	White	I	T1	N0	M0	Localized	Yes	No/Unknown	Alive	78	Alive	-0.608511	-0.808636	-0.285629	-0.367709
4007943	2010	27	21-40	White	I	T1	N0	M0	Localized	Yes	No/Unknown	Alive	82	Alive	-0.608511	-0.808636	-0.285629	-0.367709
4008000	2010	27	21-40	White	I	T1	N0	M0	Localized	Yes	No/Unknown	Alive	83	Alive	-0.608511	-0.808636	-0.285629	-0.367709
4008518	2010	15	0-20	White	I	T1	N0	M0	Localized	Yes	No/Unknown	Miscellaneous Malignant Cancer	15	Dead	-1.28845	-1.26595	-0.285629	-0.367709
4008891	2010	27	21-40	White	I	T2	N0	M0	Localized	Yes	No/Unknown	Alive	77	Alive	-0.608511	-0.687716	-0.082906	-0.175537
4008893	2010	32	21-40	White	I	T1	N0	M0	Localized	Yes	No/Unknown	Alive	79	Alive	-0.608511	-0.808636	-0.285629	-0.367709
4009091	2010	29	21-40	White	II	T1	N2	M0	Regional	Yes	No/Unknown	Alive	80	Alive	0.618093	0.434813	-0.174402	-0.128986
4010009	2010	61	>60	White	I	T1	N0	M0	Localized	Yes	Yes	Alive	76	Alive	0.751355	0.508903	-0.285629	-0.367709
4010564	2010	29	21-40	White	I	T1	N0	M0	Localized	Yes	No/Unknown	Alive	72	Alive	-0.608511	-0.808636	-0.285629	-0.367709
4012270	2010	53	41-60	White	I	T1	N0	M0	Localized	Yes	No/Unknown	Alive	72	Alive	0.071422	-0.351317	-0.285629	-0.367709
4012585	2010	20	0-20	White	I	T1	N0	M0	Localized	Yes	No/Unknown	Alive	74	Alive	-1.28845	-1.26595	-0.285629	-0.367709
4012668	2010	29	21-40	Others	II	T1	N2	M0	Regional	Yes	No/Unknown	Alive	72	Alive	0.906397	0.980704	-0.174402	-0.128986
4013166	2009	46	41-60	Others	I	T1	N0	M0	Regional	Yes	No/Unknown	Alive	91	Alive	1.25036	1.0528	-0.285629	-0.367709
4013432	2010	36	21-40	White	III	T3	N3	M1	Distant	Yes	No/Unknown	Testis	0	Dead	1.8447	2.91055	2.32011	3.10773
4013462	2010	32	21-40	White	III	T1	N1	M1	Distant	Yes	No/Unknown	Alive	62	Alive	1.8447	2.66871	1.80343	2.48467
4014841	2010	32	21-40	White	I	T2	N0	M0	Localized	Yes	No/Unknown	Alive	75	Alive	-0.608511	-0.687716	-0.082906	-0.175537
4015499	2010	26	21-40	White	III	T4	N3	M0	Distant	Yes	No/Unknown	Testis	2	Dead	1.8447	2.04102	0.489382	0.566892
4015523	2010	37	21-40	White	I	T1	N0	M0	Localized	Yes	No/Unknown	Alive	73	Alive	-0.608511	-0.808636	-0.285629	-0.367709
4016355	2010	28	21-40	White	I	T1	N0	M0	Localized	Yes	No/Unknown	Alive	77	Alive	-0.608511	-0.808636	-0.285629	-0.367709
4016363	2010	37	21-40	White	I	T1	N0	M0	Localized	Yes	No/Unknown	Alive	82	Alive	-0.608511	-0.808636	-0.285629	-0.367709
4016366	2010	26	21-40	White	I	T1	N0	M0	Localized	Yes	No/Unknown	Alive	72	Alive	-0.608511	-0.808636	-0.285629	-0.367709
4017131	2010	44	41-60	White	I	T1	N0	M0	Localized	Yes	No/Unknown	Alive	76	Alive	0.071422	-0.351317	-0.285629	-0.367709
4018123	2010	18	0-20	White	III	T1	N3	M1	Distant	Yes	No/Unknown	Alive	72	Alive	1.16476	2.21139	1.91466	2.72339
4021399	2010	40	21-40	White	III	T1	N1	M0	Regional	Yes	Yes	Alive	77	Alive	0.954063	1.22293	-0.230016	-0.248348
4021941	2011	64	>60	White	III	T1	N0	M1	Distant	Yes	No/Unknown	Testis	2	Dead	3.20456	3.58335	1.74782	2.36531
4022411	2010	31	21-40	White	I	T2	N0	M0	Localized	Yes	No/Unknown	Alive	1	Alive	-0.608511	-0.687716	-0.082906	-0.175537
4024792	2010	47	41-60	Black	III	T1	N1	M1	Distant	Yes	No/Unknown	Accidents and Adverse Effects	15	Dead	2.66878	3.39897	1.80343	2.48467
4026406	2010	39	21-40	White	I	T2	N0	M0	Localized	Yes	No/Unknown	Alive	73	Alive	-0.608511	-0.687716	-0.082906	-0.175537
4027032	2011	32	21-40	White	I	T2	N0	M0	Localized	Yes	No/Unknown	Alive	70	Alive	-0.608511	-0.687716	-0.082906	-0.175537
4027564	2010	32	21-40	White	I	T1	N0	M0	Localized	Yes	No/Unknown	Alive	73	Alive	-0.608511	-0.808636	-0.285629	-0.367709
4027774	2010	21	21-40	White	II	T1	N2	M0	Regional	Yes	No/Unknown	Alive	75	Alive	0.618093	0.434813	-0.174402	-0.128986
4029435	2011	47	41-60	Others	II	T1	N1	M0	Regional	Yes	No/Unknown	Alive	69	Alive	1.58633	1.43802	-0.230016	-0.248348
4032602	2010	29	21-40	White	III	T1	N0	M1	Distant	Yes	No/Unknown	Alive	2	Alive	1.8447	2.66871	1.74782	2.36531
4033880	2010	49	41-60	White	I	T2	N0	M0	Localized	Yes	No/Unknown	Alive	73	Alive	0.071422	-0.230397	-0.082906	-0.175537
4033919	2011	29	21-40	White	I	T1	N0	M0	Localized	Yes	No/Unknown	Alive	17	Alive	-0.608511	-0.808636	-0.285629	-0.367709
4033922	2011	23	21-40	Black	II	T1	N1	M0	Regional	Yes	No/Unknown	Alive	65	Alive	0.762245	0.707759	-0.230016	-0.248348
4033923	2011	48	41-60	White	II	T3	N3	M0	Regional	Yes	No/Unknown	Alive	67	Alive	1.29803	1.13397	0.286659	0.37472
4033930	2011	35	21-40	White	I	T1	N0	M0	Localized	Yes	Yes	Alive	67	Alive	-0.608511	-0.405734	-0.285629	-0.367709
4033945	2011	60	41-60	White	I	T2	N0	M0	Localized	Yes	No/Unknown	Alive	67	Alive	0.071422	-0.230397	-0.082906	-0.175537
4033946	2011	57	41-60	Others	I	T1	N0	M0	Localized	Yes	No/Unknown	Alive	68	Alive	0.359727	0.194574	-0.285629	-0.367709
4033949	2011	28	21-40	White	II	T1	N3	M0	Regional	Yes	No/Unknown	Alive	68	Alive	0.618093	0.434813	-0.118788	-0.009625
4033951	2011	28	21-40	White	I	T1	N0	M0	Localized	Yes	Yes	Alive	67	Alive	-0.608511	-0.405734	-0.285629	-0.367709
4036520	2011	35	21-40	White	I	T1	N0	M0	Localized	Yes	No/Unknown	Alive	50	Alive	-0.608511	-0.808636	-0.285629	-0.367709
4036524	2011	29	21-40	White	I	T2	N0	M0	Localized	Yes	No/Unknown	Alive	65	Alive	-0.608511	-0.687716	-0.082906	-0.175537
4036525	2011	33	21-40	White	I	T1	N0	M0	Localized	Yes	No/Unknown	Alive	71	Alive	-0.608511	-0.808636	-0.285629	-0.367709
4036528	2011	34	21-40	White	I	T2	N0	M0	Localized	Yes	No/Unknown	Alive	71	Alive	-0.608511	-0.687716	-0.082906	-0.175537
4036530	2011	36	21-40	White	I	T1	N0	M0	Localized	Yes	No/Unknown	Alive	67	Alive	-0.608511	-0.808636	-0.285629	-0.367709
4037143	2010	25	21-40	White	I	T1	N0	M0	Localized	Yes	No/Unknown	Alive	12	Alive	-0.608511	-0.808636	-0.285629	-0.367709
4038137	2011	34	21-40	Others	I	T1	N0	M0	Localized	Yes	No/Unknown	Alive	68	Alive	-0.320207	-0.262745	-0.285629	-0.367709
4038143	2011	45	41-60	White	I	T1	N0	M0	Localized	Yes	Yes	Alive	67	Alive	0.071422	0.051585	-0.285629	-0.367709
4038145	2011	42	41-60	White	I	T1	N0	M0	Localized	Yes	Yes	Alive	67	Alive	0.071422	0.051585	-0.285629	-0.367709
4038146	2011	47	41-60	White	I	T2	N0	M0	Localized	Yes	No/Unknown	Alive	65	Alive	0.071422	-0.230397	-0.082906	-0.175537
4038956	2010	47	41-60	Black	I	T1	N0	M0	Regional	Yes	No/Unknown	Alive	73	Alive	1.10621	0.77986	-0.285629	-0.367709
4039627	2010	33	21-40	White	I	T1	N0	M0	Localized	Yes	No/Unknown	Alive	74	Alive	-0.608511	-0.808636	-0.285629	-0.367709
4041503	2010	34	21-40	White	I	T1	N0	M0	Localized	Yes	No/Unknown	Alive	66	Alive	-0.608511	-0.808636	-0.285629	-0.367709
4043302	2010	22	21-40	White	I	T1	N0	M0	Localized	Yes	No/Unknown	Alive	80	Alive	-0.608511	-0.808636	-0.285629	-0.367709
4044088	2011	42	41-60	White	I	T1	N0	M0	Localized	Yes	No/Unknown	Alive	69	Alive	0.071422	-0.351317	-0.285629	-0.367709
4044135	2011	80	>60	White	I	T1	N0	M0	Localized	Yes	No/Unknown	Alive	68	Alive	0.751355	0.106002	-0.285629	-0.367709
4044287	2011	26	21-40	White	I	T1	N0	M0	Localized	Yes	No/Unknown	Alive	66	Alive	-0.608511	-0.808636	-0.285629	-0.367709
4045141	2011	40	21-40	Others	I	T1	N0	M0	Localized	Yes	No/Unknown	Alive	67	Alive	-0.320207	-0.262745	-0.285629	-0.367709
4046450	2011	21	21-40	White	III	T2	N1	M1	Distant	Yes	No/Unknown	Alive	65	Alive	1.8447	2.78963	2.00616	2.67684
4046553	2011	44	41-60	White	I	T2	N0	M0	Localized	Yes	No/Unknown	Alive	66	Alive	0.071422	-0.230397	-0.082906	-0.175537
4047015	2011	28	21-40	White	I	T1	N0	M0	Localized	Yes	No/Unknown	Alive	66	Alive	-0.608511	-0.808636	-0.285629	-0.367709
4047724	2011	24	21-40	Others	I	T3	N0	M0	Regional	Yes	No/Unknown	Alive	68	Alive	0.570427	0.837326	0.119817	0.016635
4047726	2011	32	21-40	White	I	T1	N0	M0	Localized	Yes	No/Unknown	Alive	64	Alive	-0.608511	-0.808636	-0.285629	-0.367709
4048167	2011	33	21-40	White	I	T1	N0	M0	Localized	Yes	Yes	Alive	65	Alive	-0.608511	-0.405734	-0.285629	-0.367709
4050761	2011	20	0-20	White	II	T1	N2	M0	Regional	Yes	No/Unknown	Alive	61	Alive	-0.061841	-0.022506	-0.174402	-0.128986
4050936	2011	31	21-40	White	I	T1	N0	M0	Localized	Yes	No/Unknown	Alive	69	Alive	-0.608511	-0.808636	-0.285629	-0.367709
4051030	2011	26	21-40	Others	II	T3	N1	M0	Regional	Yes	No/Unknown	Alive	61	Alive	0.906397	1.22254	0.175431	0.135997
4051099	2011	47	41-60	White	I	T1	N0	M0	Localized	Yes	No/Unknown	Alive	61	Alive	0.071422	-0.351317	-0.285629	-0.367709
4051206	2011	39	21-40	Others	I	T1	N0	M0	Localized	Yes	No/Unknown	Alive	62	Alive	-0.320207	-0.262745	-0.285629	-0.367709
4051381	2011	35	21-40	White	I	T1	N0	M0	Localized	Yes	No/Unknown	Alive	63	Alive	-0.608511	-0.808636	-0.285629	-0.367709
4051621	2011	26	21-40	White	I	T2	N0	M0	Localized	Yes	No/Unknown	Alive	65	Alive	-0.608511	-0.687716	-0.082906	-0.175537
4051652	2011	26	21-40	White	I	T1	N0	M0	Localized	Yes	No/Unknown	Alive	64	Alive	-0.608511	-0.808636	-0.285629	-0.367709
4051655	2011	40	21-40	White	I	T1	N0	M0	Localized	Yes	No/Unknown	Alive	63	Alive	-0.608511	-0.808636	-0.285629	-0.367709
4051667	2011	36	21-40	White	I	T2	N0	M0	Localized	Yes	No/Unknown	Alive	63	Alive	-0.608511	-0.687716	-0.082906	-0.175537
4051841	2011	38	21-40	White	I	T1	N0	M0	Localized	Yes	No/Unknown	Alive	53	Alive	-0.608511	-0.808636	-0.285629	-0.367709
4052155	2011	55	41-60	White	III	T1	N0	M1	Regional	Yes	Yes	Alive	63	Alive	1.634	2.6707	1.74782	2.36531
4052494	2011	33	21-40	White	I	T1	N0	M0	Localized	Yes	Yes	Alive	37	Alive	-0.608511	-0.405734	-0.285629	-0.367709
4053280	2011	47	41-60	White	I	T1	N0	M0	Localized	Yes	No/Unknown	Alive	62	Alive	0.071422	-0.351317	-0.285629	-0.367709
4054384	2011	32	21-40	White	I	T1	N0	M0	Localized	Yes	No/Unknown	Alive	60	Alive	-0.608511	-0.808636	-0.285629	-0.367709
4055683	2011	29	21-40	White	I	T1	N0	M0	Regional	Yes	No/Unknown	Alive	61	Alive	0.282123	0.049596	-0.285629	-0.367709
4056331	2011	60	41-60	Others	I	T1	N0	M0	Localized	Yes	No/Unknown	Alive	64	Alive	0.359727	0.194574	-0.285629	-0.367709
4056548	2011	19	0-20	White	I	T1	N0	M0	Localized	Yes	No/Unknown	Alive	61	Alive	-1.28845	-1.26595	-0.285629	-0.367709
4058074	2011	40	21-40	White	I	T2	N0	M0	Localized	Yes	No/Unknown	Alive	63	Alive	-0.608511	-0.687716	-0.082906	-0.175537
4058077	2011	40	21-40	White	I	T1	N0	M0	Localized	Yes	No/Unknown	Alive	39	Alive	-0.608511	-0.808636	-0.285629	-0.367709
4058522	2011	21	21-40	White	I	T2	N0	M0	Regional	Yes	No/Unknown	Alive	60	Alive	0.282123	0.170516	-0.082906	-0.175537
4059463	2011	2	0-20	White	III	T3	N1	M1	Distant	Yes	No/Unknown	Alive	60	Alive	1.16476	2.45323	2.20888	2.86901
4059919	2011	33	21-40	White	I	T1	N0	M0	Localized	Yes	No/Unknown	Alive	60	Alive	-0.608511	-0.808636	-0.285629	-0.367709
4060252	2011	34	21-40	White	I	T1	N0	M0	Localized	Yes	No/Unknown	Alive	64	Alive	-0.608511	-0.808636	-0.285629	-0.367709
4060532	2011	36	21-40	Others	I	T1	N0	M0	Localized	Yes	No/Unknown	Alive	66	Alive	-0.320207	-0.262745	-0.285629	-0.367709
4061281	2012	21	21-40	White	II	T1	N2	M0	Regional	Yes	No/Unknown	Alive	59	Alive	0.618093	0.434813	-0.174402	-0.128986
4062941	2012	27	21-40	White	III	T3	N0	M1	Distant	Yes	No/Unknown	Alive	52	Alive	1.8447	2.91055	2.15327	2.74965
4063626	2011	26	21-40	Others	I	T1	N0	M0	Localized	Yes	No/Unknown	Alive	61	Alive	-0.320207	-0.262745	-0.285629	-0.367709
4063912	2011	27	21-40	White	I	T1	N0	M0	Localized	Yes	No/Unknown	Alive	63	Alive	-0.608511	-0.808636	-0.285629	-0.367709
4064291	2011	53	41-60	White	I	T2	N0	M0	Localized	Yes	No/Unknown	Alive	61	Alive	0.071422	-0.230397	-0.082906	-0.175537
4065521	2011	24	21-40	White	I	T1	N0	M0	Localized	Yes	No/Unknown	Alive	60	Alive	-0.608511	-0.808636	-0.285629	-0.367709
4065997	2011	47	41-60	White	I	T1	N0	M0	Localized	Yes	No/Unknown	Alive	61	Alive	0.071422	-0.351317	-0.285629	-0.367709
4067639	2012	38	21-40	White	I	T1	N0	M0	Localized	Yes	Yes	Alive	49	Alive	-0.608511	-0.405734	-0.285629	-0.367709
4070685	2012	28	21-40	White	III	T3	N2	M1	Distant	Yes	No/Unknown	Alive	46	Alive	1.8447	2.91055	2.26449	2.98837
4072194	2012	21	21-40	White	III	T1	N0	M1	Distant	Yes	No/Unknown	Alive	58	Alive	1.8447	2.66871	1.74782	2.36531
4073310	2012	25	21-40	White	I	T1	N0	M0	Regional	Yes	No/Unknown	Alive	58	Alive	0.282123	0.049596	-0.285629	-0.367709
4074556	2012	38	21-40	White	I	T1	N0	M0	Localized	Yes	No/Unknown	Alive	55	Alive	-0.608511	-0.808636	-0.285629	-0.367709
4074640	2012	33	21-40	White	I	T1	N0	M0	Localized	Yes	No/Unknown	Alive	56	Alive	-0.608511	-0.808636	-0.285629	-0.367709
4075008	2012	19	0-20	White	I	T1	N0	M0	Localized	Yes	Yes	Alive	56	Alive	-1.28845	-0.863053	-0.285629	-0.367709
4075952	2012	48	41-60	Others	I	T2	N0	M0	Localized	Yes	No/Unknown	Alive	55	Alive	0.359727	0.315493	-0.082906	-0.175537
4076657	2012	26	21-40	White	I	T1	N0	M0	Localized	Yes	No/Unknown	Alive	56	Alive	-0.608511	-0.808636	-0.285629	-0.367709
4077025	2012	35	21-40	White	I	T1	N0	M0	Localized	Yes	Yes	Alive	54	Alive	-0.608511	-0.405734	-0.285629	-0.367709
4077147	2012	35	21-40	White	I	T1	N0	M0	Localized	Yes	No/Unknown	Alive	55	Alive	-0.608511	-0.808636	-0.285629	-0.367709
4077475	2012	28	21-40	Others	I	T1	N0	M0	Localized	Yes	No/Unknown	Alive	56	Alive	-0.320207	-0.262745	-0.285629	-0.367709
4077532	2012	29	21-40	White	I	T1	N0	M0	Localized	Yes	No/Unknown	Alive	58	Alive	-0.608511	-0.808636	-0.285629	-0.367709
4077646	2012	28	21-40	White	I	T1	N0	M0	Localized	Yes	No/Unknown	Alive	54	Alive	-0.608511	-0.808636	-0.285629	-0.367709
4078340	2012	33	21-40	White	III	T1	N3	M1	Regional	Yes	No/Unknown	Alive	43	Alive	0.954063	1.81048	1.91466	2.72339
4078434	2012	20	0-20	White	I	T1	N0	M0	Localized	Yes	No/Unknown	Alive	50	Alive	-1.28845	-1.26595	-0.285629	-0.367709
4080279	2012	37	21-40	White	I	T1	N0	M0	Localized	Yes	No/Unknown	Alive	52	Alive	-0.608511	-0.808636	-0.285629	-0.367709
4080324	2012	25	21-40	White	III	T1	N3	M0	Regional	Yes	No/Unknown	Alive	54	Alive	0.954063	0.82003	-0.118788	-0.009625
4080973	2012	48	41-60	White	I	T1	N0	M0	Localized	Yes	No/Unknown	Alive	54	Alive	0.071422	-0.351317	-0.285629	-0.367709
4081089	2012	32	21-40	White	I	T2	N0	M0	Localized	Yes	Yes	Testis	26	Dead	-0.608511	-0.284814	-0.082906	-0.175537
4081347	2012	21	21-40	White	I	T1	N0	M0	Regional	Yes	No/Unknown	Alive	54	Alive	0.282123	0.049596	-0.285629	-0.367709
4082553	2012	26	21-40	White	I	T2	N0	M0	Localized	Yes	No/Unknown	Alive	56	Alive	-0.608511	-0.687716	-0.082906	-0.175537
4082863	2012	31	21-40	White	I	T1	N0	M0	Localized	Yes	No/Unknown	Alive	55	Alive	-0.608511	-0.808636	-0.285629	-0.367709
4083496	2012	43	41-60	White	II	T1	N2	M0	Regional	Yes	Yes	Alive	52	Alive	1.29803	1.29503	-0.174402	-0.128986
4083622	2012	31	21-40	White	II	T2	N1	M0	Distant	Yes	No/Unknown	Alive	51	Alive	1.50873	1.41396	-0.027292	-0.056176
4084193	2012	53	41-60	White	I	T1	N0	M0	Localized	Yes	No/Unknown	Alive	55	Alive	0.071422	-0.351317	-0.285629	-0.367709
4084200	2012	37	21-40	White	III	T3	N0	M1	Distant	Yes	Yes	Testis	14	Dead	1.8447	3.31345	2.15327	2.74965
4084466	2012	58	41-60	White	III	T1	N3	M1	Distant	Yes	No/Unknown	Alive	53	Alive	2.52463	3.12603	1.91466	2.72339
4084479	2012	53	41-60	White	II	T2	N1	M0	Regional	Yes	Yes	Alive	53	Alive	1.29803	1.41595	-0.027292	-0.056176
4084896	2012	29	21-40	White	I	T2	N0	M0	Localized	Yes	No/Unknown	Alive	50	Alive	-0.608511	-0.687716	-0.082906	-0.175537
4085032	2012	38	21-40	White	I	T2	N0	M0	Localized	Yes	Yes	Alive	2	Alive	-0.608511	-0.284814	-0.082906	-0.175537
4085221	2012	41	41-60	White	I	T1	N0	M0	Localized	Yes	No/Unknown	Alive	49	Alive	0.071422	-0.351317	-0.285629	-0.367709
4085697	2012	29	21-40	Others	I	T2	N0	M0	Localized	Yes	No/Unknown	Alive	49	Alive	-0.320207	-0.141825	-0.082906	-0.175537
4086652	2012	41	41-60	White	II	T1	N2	M0	Regional	Yes	No/Unknown	Alive	56	Alive	1.29803	0.892132	-0.174402	-0.128986
4087414	2012	57	41-60	White	III	T2	N3	M0	Regional	Yes	No/Unknown	Alive	51	Alive	1.634	1.39827	0.083935	0.182548
4087507	2012	35	21-40	White	I	T1	N0	M0	Localized	Yes	No/Unknown	Alive	54	Alive	-0.608511	-0.808636	-0.285629	-0.367709
4088114	2012	34	21-40	Black	I	T1	N0	M0	Localized	Yes	Yes	Alive	54	Alive	-0.464359	-0.132789	-0.285629	-0.367709
4089155	2012	52	41-60	White	I	T1	N0	M0	Localized	Yes	No/Unknown	Alive	52	Alive	0.071422	-0.351317	-0.285629	-0.367709
4089347	2012	50	41-60	White	II	T1	N1	M0	Regional	Yes	Yes	Alive	53	Alive	1.29803	1.29503	-0.230016	-0.248348
4089835	2012	34	21-40	White	I	T1	N0	M0	Localized	Yes	No/Unknown	Alive	49	Alive	-0.608511	-0.808636	-0.285629	-0.367709
4090252	2012	37	21-40	White	II	T1	N2	M0	Regional	Yes	No/Unknown	Alive	54	Alive	0.618093	0.434813	-0.174402	-0.128986
4090638	2012	29	21-40	White	I	T1	N0	M0	Localized	Yes	No/Unknown	Alive	49	Alive	-0.608511	-0.808636	-0.285629	-0.367709
4092209	2012	33	21-40	White	I	T1	N0	M0	Localized	Yes	No/Unknown	Alive	54	Alive	-0.608511	-0.808636	-0.285629	-0.367709
4092310	2012	47	41-60	White	I	T1	N0	M0	Localized	Yes	No/Unknown	Alive	54	Alive	0.071422	-0.351317	-0.285629	-0.367709
4093640	2012	29	21-40	White	I	T1	N0	M0	Localized	Yes	No/Unknown	Alive	50	Alive	-0.608511	-0.808636	-0.285629	-0.367709
4094332	2012	31	21-40	White	I	T1	N0	M0	Regional	Yes	No/Unknown	Alive	26	Alive	0.282123	0.049596	-0.285629	-0.367709
4094340	2012	42	41-60	White	I	T1	N0	M0	Localized	Yes	No/Unknown	Chronic Liver Disease and Cirrhosis	35	Dead	0.071422	-0.351317	-0.285629	-0.367709
4094423	2012	56	41-60	White	II	T1	N1	M0	Regional	Yes	No/Unknown	Alive	48	Alive	1.29803	0.892132	-0.230016	-0.248348
4095087	2012	29	21-40	White	II	T1	N1	M0	Regional	Yes	No/Unknown	Alive	58	Alive	0.618093	0.434813	-0.230016	-0.248348
4096045	2012	55	41-60	White	I	T1	N0	M0	Localized	Yes	No/Unknown	Alive	49	Alive	0.071422	-0.351317	-0.285629	-0.367709
4097067	2012	23	21-40	Others	I	T1	N0	M0	Localized	Yes	No/Unknown	Alive	50	Alive	-0.320207	-0.262745	-0.285629	-0.367709
4098795	2012	43	41-60	White	III	T1	N2	M0	Regional	Yes	No/Unknown	Alive	49	Alive	1.634	1.27735	-0.174402	-0.128986
4098892	2012	37	21-40	White	I	T1	N0	M0	Localized	Yes	Yes	Alive	48	Alive	-0.608511	-0.405734	-0.285629	-0.367709
4099063	2011	21	21-40	White	I	T1	N0	M0	Localized	Yes	No/Unknown	Alive	60	Alive	-0.608511	-0.808636	-0.285629	-0.367709
4099429	2012	38	21-40	Black	I	T1	N0	M0	Localized	Yes	No/Unknown	Alive	48	Alive	-0.464359	-0.53569	-0.285629	-0.367709
4100175	2012	50	41-60	Others	II	T3	N1	M0	Regional	Yes	No/Unknown	Alive	47	Alive	1.58633	1.67986	0.175431	0.135997
4100270	2012	34	21-40	Others	I	T1	N0	M0	Localized	Yes	No/Unknown	Alive	58	Alive	-0.320207	-0.262745	-0.285629	-0.367709
4100294	2012	33	21-40	White	I	T1	N0	M0	Localized	Yes	No/Unknown	Alive	12	Alive	-0.608511	-0.808636	-0.285629	-0.367709
4100689	2012	35	21-40	White	I	T1	N0	M0	Localized	Yes	No/Unknown	Alive	49	Alive	-0.608511	-0.808636	-0.285629	-0.367709
4101534	2012	24	21-40	White	III	T1	N3	M1	Distant	Yes	No/Unknown	Alive	49	Alive	1.8447	2.66871	1.91466	2.72339
4102353	2012	26	21-40	White	III	T2	N0	M1	Regional	Yes	No/Unknown	Alive	48	Alive	0.954063	1.9314	1.95054	2.55748
4102796	2013	28	21-40	Black	II	T2	N1	M0	Regional	Yes	No/Unknown	Alive	47	Alive	0.762245	0.828678	-0.027292	-0.056176
4102957	2012	82	>60	White	I	T1	N0	M0	Localized	Yes	No/Unknown	Alive	48	Alive	0.751355	0.106002	-0.285629	-0.367709
4103495	2013	35	21-40	White	I	T2	N0	M0	Localized	Yes	No/Unknown	Alive	35	Alive	-0.608511	-0.687716	-0.082906	-0.175537
4103916	2013	40	21-40	White	I	T2	N0	M0	Localized	Yes	No/Unknown	Alive	45	Alive	-0.608511	-0.687716	-0.082906	-0.175537
4104013	2012	30	21-40	Others	I	T1	N0	M0	Localized	Yes	No/Unknown	Alive	54	Alive	-0.320207	-0.262745	-0.285629	-0.367709
4104457	2012	49	41-60	White	I	T1	N0	M0	Localized	Yes	No/Unknown	Alive	51	Alive	0.071422	-0.351317	-0.285629	-0.367709
4104638	2013	44	41-60	White	III	T2	N3	M0	Regional	Yes	No/Unknown	Alive	46	Alive	1.634	1.39827	0.083935	0.182548
4105417	2012	29	21-40	Others	I	T1	N0	M0	Localized	Yes	Yes	Alive	50	Alive	-0.320207	0.140156	-0.285629	-0.367709
4105645	2012	36	21-40	White	I	T1	N0	M0	Localized	Yes	No/Unknown	Alive	49	Alive	-0.608511	-0.808636	-0.285629	-0.367709
4105900	2013	23	21-40	White	I	T1	N0	M0	Localized	Yes	No/Unknown	Alive	12	Alive	-0.608511	-0.808636	-0.285629	-0.367709
4106636	2013	50	41-60	White	I	T1	N0	M0	Localized	Yes	No/Unknown	Alive	47	Alive	0.071422	-0.351317	-0.285629	-0.367709
4106726	2013	44	41-60	White	I	T2	N0	M0	Localized	Yes	No/Unknown	Alive	46	Alive	0.071422	-0.230397	-0.082906	-0.175537
4107041	2012	24	21-40	White	I	T2	N0	M0	Localized	Yes	No/Unknown	Alive	53	Alive	-0.608511	-0.687716	-0.082906	-0.175537
4107155	2013	41	41-60	White	I	T2	N0	M0	Localized	Yes	No/Unknown	Alive	47	Alive	0.071422	-0.230397	-0.082906	-0.175537
4107253	2012	37	21-40	Others	I	T1	N0	M0	Localized	Yes	No/Unknown	Alive	51	Alive	-0.320207	-0.262745	-0.285629	-0.367709
4107306	2013	38	21-40	White	I	T1	N0	M0	Localized	Yes	No/Unknown	Alive	47	Alive	-0.608511	-0.808636	-0.285629	-0.367709
4107670	2013	20	0-20	White	I	T1	N0	M0	Localized	Yes	No/Unknown	Alive	46	Alive	-1.28845	-1.26595	-0.285629	-0.367709
4108362	2013	30	21-40	Others	I	T1	N0	M0	Localized	Yes	No/Unknown	Alive	46	Alive	-0.320207	-0.262745	-0.285629	-0.367709
4109147	2013	19	0-20	Others	I	T1	N0	M0	Localized	Yes	No/Unknown	Alive	46	Alive	-1.00014	-0.720064	-0.285629	-0.367709
4109239	2013	30	21-40	White	I	T1	N0	M0	Localized	Yes	No/Unknown	Alive	45	Alive	-0.608511	-0.808636	-0.285629	-0.367709
4111356	2013	33	21-40	White	I	T1	N0	M0	Localized	Yes	No/Unknown	Alive	43	Alive	-0.608511	-0.808636	-0.285629	-0.367709
4111601	2012	29	21-40	White	I	T1	N0	M0	Localized	Yes	No/Unknown	Alive	51	Alive	-0.608511	-0.808636	-0.285629	-0.367709
4112421	2013	26	21-40	White	II	T2	N1	M0	Regional	Yes	No/Unknown	Alive	44	Alive	0.618093	0.555733	-0.027292	-0.056176
4114225	2013	47	41-60	White	I	T1	N0	M0	Localized	Yes	No/Unknown	Alive	44	Alive	0.071422	-0.351317	-0.285629	-0.367709
4114930	2013	26	21-40	Others	I	T3	N0	M0	Regional	Yes	No/Unknown	Alive	45	Alive	0.570427	0.837326	0.119817	0.016635
4115691	2013	20	0-20	White	I	T2	N0	M0	Localized	Yes	No/Unknown	Alive	43	Alive	-1.28845	-1.14504	-0.082906	-0.175537
4116398	2013	43	41-60	Others	I	T1	N0	M0	Localized	Yes	No/Unknown	Alive	45	Alive	0.359727	0.194574	-0.285629	-0.367709
4117163	2013	29	21-40	White	I	T1	N0	M0	Localized	Yes	No/Unknown	Alive	42	Alive	-0.608511	-0.808636	-0.285629	-0.367709
4117871	2013	20	0-20	White	I	T1	N0	M0	Localized	Yes	No/Unknown	Alive	18	Alive	-1.28845	-1.26595	-0.285629	-0.367709
4118642	2013	38	21-40	White	II	T2	N1	M0	Regional	Yes	Yes	Alive	43	Alive	0.618093	0.958635	-0.027292	-0.056176
4120032	2013	18	0-20	White	I	T1	N0	M0	Localized	Yes	No/Unknown	Alive	41	Alive	-1.28845	-1.26595	-0.285629	-0.367709
4120046	2013	31	21-40	White	II	T2	N1	M0	Regional	Yes	No/Unknown	Alive	30	Alive	0.618093	0.555733	-0.027292	-0.056176
4120204	2013	34	21-40	White	I	T1	N0	M0	Localized	Yes	No/Unknown	Alive	42	Alive	-0.608511	-0.808636	-0.285629	-0.367709
4121108	2013	31	21-40	White	II	T2	N2	M0	Regional	Yes	No/Unknown	Alive	42	Alive	0.618093	0.555733	0.028322	0.063186
4121818	2013	21	21-40	White	III	T3	N0	M1	Distant	Yes	No/Unknown	Alive	9	Alive	1.8447	2.91055	2.15327	2.74965
4122428	2013	30	21-40	White	I	T2	N0	M0	Localized	Yes	No/Unknown	Alive	35	Alive	-0.608511	-0.687716	-0.082906	-0.175537
4122712	2013	71	>60	White	I	T1	N0	M0	Localized	Yes	Yes	Alive	41	Alive	0.751355	0.508903	-0.285629	-0.367709
4123317	2013	26	21-40	White	I	T1	N0	M0	Localized	Yes	No/Unknown	Alive	41	Alive	-0.608511	-0.808636	-0.285629	-0.367709
4123780	2013	32	21-40	White	I	T2	N0	M0	Localized	Yes	No/Unknown	Alive	43	Alive	-0.608511	-0.687716	-0.082906	-0.175537
4124652	2013	32	21-40	White	I	T1	N0	M0	Localized	Yes	No/Unknown	Alive	47	Alive	-0.608511	-0.808636	-0.285629	-0.367709
4124729	2012	54	41-60	White	I	T2	N0	M0	Localized	Yes	No/Unknown	Alive	55	Alive	0.071422	-0.230397	-0.082906	-0.175537
4124776	2012	36	21-40	White	I	T1	N0	M0	Localized	Yes	No/Unknown	Alive	53	Alive	-0.608511	-0.808636	-0.285629	-0.367709
4124961	2012	26	21-40	White	I	T1	N0	M0	Localized	Yes	No/Unknown	Alive	55	Alive	-0.608511	-0.808636	-0.285629	-0.367709
4126033	2013	27	21-40	White	I	T1	N0	M0	Localized	Yes	Yes	Alive	36	Alive	-0.608511	-0.405734	-0.285629	-0.367709
4126417	2012	50	41-60	White	I	T1	N0	M0	Localized	Yes	No/Unknown	Alive	53	Alive	0.071422	-0.351317	-0.285629	-0.367709
4126685	2013	55	41-60	White	I	T2	N0	M0	Localized	Yes	No/Unknown	Alive	40	Alive	0.071422	-0.230397	-0.082906	-0.175537
4127179	2013	33	21-40	White	I	T2	N0	M0	Localized	Yes	No/Unknown	Alive	40	Alive	-0.608511	-0.687716	-0.082906	-0.175537
4127488	2013	35	21-40	White	I	T1	N0	M0	Localized	Yes	No/Unknown	Alive	42	Alive	-0.608511	-0.808636	-0.285629	-0.367709
4127699	2012	42	41-60	White	I	T1	N0	M0	Localized	Yes	No/Unknown	Alive	53	Alive	0.071422	-0.351317	-0.285629	-0.367709
4129600	2013	48	41-60	Others	I	T1	N0	M0	Localized	Yes	No/Unknown	Alive	40	Alive	0.359727	0.194574	-0.285629	-0.367709
4129652	2013	26	21-40	White	I	T1	N0	M0	Localized	Yes	No/Unknown	Alive	39	Alive	-0.608511	-0.808636	-0.285629	-0.367709
4129756	2013	41	41-60	White	II	T1	N1	M0	Regional	Yes	Yes	Alive	44	Alive	1.29803	1.29503	-0.230016	-0.248348
4130493	2013	48	41-60	White	I	T2	N0	M0	Localized	Yes	No/Unknown	Alive	40	Alive	0.071422	-0.230397	-0.082906	-0.175537
4130733	2013	18	0-20	White	III	T3	N1	M1	Distant	Yes	No/Unknown	Alive	39	Alive	1.16476	2.45323	2.20888	2.86901
4131038	2013	24	21-40	White	I	T1	N0	M0	Localized	Yes	No/Unknown	Alive	38	Alive	-0.608511	-0.808636	-0.285629	-0.367709
4131286	2013	38	21-40	White	I	T1	N0	M0	Localized	Yes	No/Unknown	Alive	46	Alive	-0.608511	-0.808636	-0.285629	-0.367709
4131905	2013	46	41-60	White	II	T1	N1	M0	Regional	Yes	Yes	Alive	39	Alive	1.29803	1.29503	-0.230016	-0.248348
4132323	2013	28	21-40	White	I	T1	N0	M0	Localized	Yes	No/Unknown	Alive	41	Alive	-0.608511	-0.808636	-0.285629	-0.367709
4133916	2013	25	21-40	White	I	T1	N0	M0	Localized	Yes	No/Unknown	Alive	42	Alive	-0.608511	-0.808636	-0.285629	-0.367709
4134151	2013	23	21-40	White	II	T1	N1	M0	Regional	Yes	No/Unknown	Alive	37	Alive	0.618093	0.434813	-0.230016	-0.248348
4134359	2013	32	21-40	Others	I	T1	N0	M0	Localized	Yes	No/Unknown	Alive	15	Alive	-0.320207	-0.262745	-0.285629	-0.367709
4134836	2013	36	21-40	White	III	T2	N1	M1	Distant	Yes	No/Unknown	Alive	38	Alive	1.8447	2.78963	2.00616	2.67684
4135269	2013	31	21-40	White	I	T2	N0	M0	Localized	Yes	Yes	Alive	38	Alive	-0.608511	-0.284814	-0.082906	-0.175537
4135363	2013	32	21-40	White	I	T1	N0	M0	Localized	Yes	No/Unknown	Alive	44	Alive	-0.608511	-0.808636	-0.285629	-0.367709
4135560	2013	23	21-40	White	I	T2	N0	M0	Localized	Yes	No/Unknown	Alive	15	Alive	-0.608511	-0.687716	-0.082906	-0.175537
4135685	2013	27	21-40	Others	I	T1	N0	M0	Localized	Yes	No/Unknown	Alive	39	Alive	-0.320207	-0.262745	-0.285629	-0.367709
4135778	2013	21	21-40	White	II	T2	N2	M0	Regional	Yes	No/Unknown	Alive	39	Alive	0.618093	0.555733	0.028322	0.063186
4135854	2013	21	21-40	White	I	T1	N0	M0	Localized	Yes	No/Unknown	Alive	38	Alive	-0.608511	-0.808636	-0.285629	-0.367709
4135973	2013	26	21-40	White	I	T1	N0	M0	Localized	Yes	No/Unknown	Alive	38	Alive	-0.608511	-0.808636	-0.285629	-0.367709
4136515	2013	42	41-60	White	I	T2	N0	M0	Localized	Yes	No/Unknown	Alive	38	Alive	0.071422	-0.230397	-0.082906	-0.175537
4136608	2013	45	41-60	White	I	T1	N0	M0	Localized	Yes	Yes	Alive	36	Alive	0.071422	0.051585	-0.285629	-0.367709
4137169	2013	50	41-60	Others	I	T1	N0	M0	Localized	Yes	No/Unknown	Alive	37	Alive	0.359727	0.194574	-0.285629	-0.367709
4533822	2013	30	21-40	Others	I	T2	N0	M0	Localized	Yes	Yes	Alive	34	Alive	-0.320207	0.261076	-0.082906	-0.175537
4534377	2013	29	21-40	Others	I	T1	N0	M0	Localized	Yes	No/Unknown	Alive	38	Alive	-0.320207	-0.262745	-0.285629	-0.367709
4534736	2013	24	21-40	White	I	T1	N0	M0	Localized	Yes	No/Unknown	Alive	38	Alive	-0.608511	-0.808636	-0.285629	-0.367709
4535029	2013	24	21-40	White	III	T1	N3	M1	Distant	Yes	No/Unknown	Alive	37	Alive	1.8447	2.66871	1.91466	2.72339
4535386	2013	28	21-40	White	I	T1	N0	M0	Localized	Yes	No/Unknown	Alive	37	Alive	-0.608511	-0.808636	-0.285629	-0.367709
4535610	2013	18	0-20	White	I	T1	N0	M0	Localized	Yes	No/Unknown	Alive	37	Alive	-1.28845	-1.26595	-0.285629	-0.367709
4535617	2013	21	21-40	White	I	T1	N0	M0	Localized	Yes	No/Unknown	Alive	35	Alive	-0.608511	-0.808636	-0.285629	-0.367709
4535917	2013	36	21-40	White	I	T1	N0	M0	Localized	Yes	No/Unknown	Alive	37	Alive	-0.608511	-0.808636	-0.285629	-0.367709
4536621	2013	44	41-60	White	II	T1	N1	M0	Regional	Yes	No/Unknown	Alive	38	Alive	1.29803	0.892132	-0.230016	-0.248348
4537072	2014	55	41-60	White	I	T2	N0	M0	Localized	Yes	No/Unknown	Accidents and Adverse Effects	29	Dead	0.071422	-0.230397	-0.082906	-0.175537
4537119	2013	29	21-40	White	III	T1	N1	M1	Distant	Yes	No/Unknown	Alive	36	Alive	1.8447	2.66871	1.80343	2.48467
4537449	2013	24	21-40	White	I	T2	N0	M0	Localized	Yes	No/Unknown	Alive	35	Alive	-0.608511	-0.687716	-0.082906	-0.175537
4537531	2013	32	21-40	White	I	T1	N0	M0	Localized	Yes	No/Unknown	Alive	36	Alive	-0.608511	-0.808636	-0.285629	-0.367709
4537769	2013	38	21-40	White	I	T1	N0	M0	Localized	Yes	No/Unknown	Alive	37	Alive	-0.608511	-0.808636	-0.285629	-0.367709
4537939	2013	24	21-40	White	I	T1	N0	M0	Localized	Yes	No/Unknown	Alive	22	Alive	-0.608511	-0.808636	-0.285629	-0.367709
4538320	2013	52	41-60	White	I	T1	N0	M0	Localized	Yes	No/Unknown	Alive	36	Alive	0.071422	-0.351317	-0.285629	-0.367709
4539607	2013	27	21-40	White	I	T1	N0	M0	Localized	Yes	No/Unknown	Alive	18	Alive	-0.608511	-0.808636	-0.285629	-0.367709
4539913	2014	29	21-40	White	I	T2	N0	M0	Localized	Yes	No/Unknown	Alive	35	Alive	-0.608511	-0.687716	-0.082906	-0.175537
4540308	2013	47	41-60	White	I	T1	N0	M0	Localized	Yes	No/Unknown	Alive	7	Alive	0.071422	-0.351317	-0.285629	-0.367709
4540533	2014	35	21-40	White	I	T1	N0	M0	Localized	Yes	No/Unknown	Alive	35	Alive	-0.608511	-0.808636	-0.285629	-0.367709
4540615	2013	63	>60	White	III	T1	N1	M1	Distant	Yes	No/Unknown	Alive	36	Alive	3.20456	3.58335	1.80343	2.48467
4540896	2014	37	21-40	White	I	T1	N0	M0	Localized	Yes	No/Unknown	Alive	34	Alive	-0.608511	-0.808636	-0.285629	-0.367709
4541251	2014	28	21-40	White	I	T1	N0	M0	Localized	Yes	No/Unknown	Alive	35	Alive	-0.608511	-0.808636	-0.285629	-0.367709
4541939	2014	33	21-40	White	I	T1	N0	M0	Localized	Yes	No/Unknown	Alive	34	Alive	-0.608511	-0.808636	-0.285629	-0.367709
4544327	2014	44	41-60	White	II	T2	N1	M0	Regional	Yes	Yes	Alive	35	Alive	1.29803	1.41595	-0.027292	-0.056176
4545241	2014	42	41-60	White	I	T1	N0	M0	Localized	Yes	Yes	Alive	32	Alive	0.071422	0.051585	-0.285629	-0.367709
4546085	2014	53	41-60	White	I	T1	N0	M0	Localized	Yes	No/Unknown	Alive	33	Alive	0.071422	-0.351317	-0.285629	-0.367709
4546232	2014	35	21-40	White	I	T1	N0	M0	Localized	Yes	No/Unknown	Alive	19	Alive	-0.608511	-0.808636	-0.285629	-0.367709
4546676	2014	26	21-40	White	I	T1	N0	M0	Localized	Yes	No/Unknown	Alive	34	Alive	-0.608511	-0.808636	-0.285629	-0.367709
4546860	2014	26	21-40	White	I	T1	N0	M0	Localized	Yes	No/Unknown	Alive	33	Alive	-0.608511	-0.808636	-0.285629	-0.367709
4546863	2014	33	21-40	White	III	T2	N0	M1	Distant	Yes	No/Unknown	Alive	33	Alive	1.8447	2.78963	1.95054	2.55748
4547160	2014	27	21-40	White	I	T1	N0	M0	Localized	Yes	No/Unknown	Alive	32	Alive	-0.608511	-0.808636	-0.285629	-0.367709
4547362	2014	25	21-40	White	I	T1	N0	M0	Localized	Yes	No/Unknown	Alive	23	Alive	-0.608511	-0.808636	-0.285629	-0.367709
4548023	2014	45	41-60	Others	I	T2	N0	M0	Localized	Yes	No/Unknown	Alive	33	Alive	0.359727	0.315493	-0.082906	-0.175537
4548208	2014	57	41-60	White	I	T2	N0	M0	Localized	Yes	No/Unknown	Alive	34	Alive	0.071422	-0.230397	-0.082906	-0.175537
4548332	2014	33	21-40	White	I	T2	N0	M0	Localized	Yes	No/Unknown	Alive	20	Alive	-0.608511	-0.687716	-0.082906	-0.175537
4548716	2014	42	41-60	White	I	T1	N0	M0	Localized	Yes	No/Unknown	Alive	32	Alive	0.071422	-0.351317	-0.285629	-0.367709
4548864	2014	49	41-60	White	I	T1	N0	M0	Localized	Yes	No/Unknown	Alive	31	Alive	0.071422	-0.351317	-0.285629	-0.367709
4549602	2014	31	21-40	White	I	T1	N0	M0	Localized	Yes	No/Unknown	Alive	33	Alive	-0.608511	-0.808636	-0.285629	-0.367709
4549700	2014	32	21-40	White	I	T1	N0	M0	Localized	Yes	No/Unknown	Alive	33	Alive	-0.608511	-0.808636	-0.285629	-0.367709
4551440	2014	73	>60	White	I	T1	N0	M0	Localized	Yes	No/Unknown	Alive	31	Alive	0.751355	0.106002	-0.285629	-0.367709
4552767	2014	19	0-20	White	III	T3	N3	M1	Distant	Yes	No/Unknown	Alive	31	Alive	1.16476	2.45323	2.32011	3.10773
4553141	2014	38	21-40	White	II	T2	N1	M0	Regional	Yes	No/Unknown	Alive	32	Alive	0.618093	0.555733	-0.027292	-0.056176
4553399	2014	31	21-40	White	I	T1	N0	M0	Localized	Yes	No/Unknown	Alive	31	Alive	-0.608511	-0.808636	-0.285629	-0.367709
4553484	2014	29	21-40	White	I	T1	N0	M0	Localized	Yes	No/Unknown	Alive	32	Alive	-0.608511	-0.808636	-0.285629	-0.367709
4553919	2014	26	21-40	White	I	T1	N0	M0	Localized	Yes	No/Unknown	Alive	31	Alive	-0.608511	-0.808636	-0.285629	-0.367709
4554152	2014	32	21-40	White	I	T1	N0	M0	Localized	Yes	No/Unknown	Alive	33	Alive	-0.608511	-0.808636	-0.285629	-0.367709
4554161	2014	27	21-40	White	I	T1	N0	M0	Localized	Yes	No/Unknown	Alive	29	Alive	-0.608511	-0.808636	-0.285629	-0.367709
4554771	2014	50	41-60	White	I	T1	N0	M0	Localized	Yes	No/Unknown	Alive	31	Alive	0.071422	-0.351317	-0.285629	-0.367709
4555251	2014	16	0-20	Others	I	T1	N0	M0	Localized	Yes	No/Unknown	Alive	33	Alive	-1.00014	-0.720064	-0.285629	-0.367709
4555594	2014	28	21-40	White	I	T1	N0	M0	Localized	Yes	No/Unknown	Alive	30	Alive	-0.608511	-0.808636	-0.285629	-0.367709
4556413	2014	23	21-40	White	I	T1	N0	M0	Localized	Yes	No/Unknown	Alive	31	Alive	-0.608511	-0.808636	-0.285629	-0.367709
4557515	2014	52	41-60	White	I	T2	N0	M0	Localized	Yes	No/Unknown	Alive	28	Alive	0.071422	-0.230397	-0.082906	-0.175537
4557526	2014	30	21-40	White	I	T2	N0	M0	Localized	Yes	No/Unknown	Alive	28	Alive	-0.608511	-0.687716	-0.082906	-0.175537
4557765	2013	46	41-60	White	I	T1	N0	M0	Localized	Yes	No/Unknown	Alive	47	Alive	0.071422	-0.351317	-0.285629	-0.367709
4557771	2013	28	21-40	White	I	T2	N0	M0	Localized	Yes	No/Unknown	Alive	3	Alive	-0.608511	-0.687716	-0.082906	-0.175537
4558501	2014	38	21-40	White	II	T1	N3	M0	Regional	Yes	No/Unknown	Alive	31	Alive	0.618093	0.434813	-0.118788	-0.009625
4558689	2014	27	21-40	White	I	T1	N0	M0	Localized	Yes	No/Unknown	Alive	29	Alive	-0.608511	-0.808636	-0.285629	-0.367709
4559189	2014	54	41-60	White	I	T2	N0	M0	Localized	Yes	Yes	Alive	21	Alive	0.071422	0.172504	-0.082906	-0.175537
4559244	2014	26	21-40	White	I	T1	N0	M0	Localized	Yes	No/Unknown	Alive	23	Alive	-0.608511	-0.808636	-0.285629	-0.367709
4559668	2014	18	0-20	White	III	T1	N1	M1	Distant	Yes	No/Unknown	Alive	17	Alive	1.16476	2.21139	1.80343	2.48467
4560463	2014	35	21-40	White	I	T1	N0	M0	Localized	Yes	No/Unknown	Alive	28	Alive	-0.608511	-0.808636	-0.285629	-0.367709
4560677	2014	18	0-20	White	III	T1	N1	M1	Distant	Yes	No/Unknown	Alive	29	Alive	1.16476	2.21139	1.80343	2.48467
4561625	2014	29	21-40	White	I	T1	N0	M0	Localized	Yes	No/Unknown	Alive	29	Alive	-0.608511	-0.808636	-0.285629	-0.367709
4562361	2014	29	21-40	White	I	T1	N0	M0	Localized	Yes	No/Unknown	Alive	27	Alive	-0.608511	-0.808636	-0.285629	-0.367709
4562783	2014	37	21-40	Others	I	T1	N0	M0	Localized	Yes	No/Unknown	Alive	30	Alive	-0.320207	-0.262745	-0.285629	-0.367709
4563359	2013	39	21-40	White	I	T1	N0	M0	Localized	Yes	No/Unknown	Alive	38	Alive	-0.608511	-0.808636	-0.285629	-0.367709
4563861	2014	40	21-40	Others	I	T2	N0	M0	Localized	Yes	No/Unknown	Alive	28	Alive	-0.320207	-0.141825	-0.082906	-0.175537
4564201	2014	28	21-40	White	I	T2	N0	M0	Localized	Yes	No/Unknown	Alive	29	Alive	-0.608511	-0.687716	-0.082906	-0.175537
4564845	2014	26	21-40	White	I	T1	N0	M0	Localized	Yes	No/Unknown	Alive	28	Alive	-0.608511	-0.808636	-0.285629	-0.367709
4565638	2014	27	21-40	Others	I	T1	N0	M0	Localized	Yes	No/Unknown	Alive	28	Alive	-0.320207	-0.262745	-0.285629	-0.367709
4565909	2014	24	21-40	White	I	T1	N0	M0	Localized	Yes	No/Unknown	Alive	28	Alive	-0.608511	-0.808636	-0.285629	-0.367709
4565928	2014	48	41-60	White	II	T1	N2	M0	Regional	Yes	No/Unknown	Alive	26	Alive	1.29803	0.892132	-0.174402	-0.128986
4566442	2014	29	21-40	White	I	T1	N0	M0	Localized	Yes	No/Unknown	Alive	26	Alive	-0.608511	-0.808636	-0.285629	-0.367709
4566884	2014	26	21-40	White	I	T1	N0	M0	Localized	Yes	No/Unknown	Alive	29	Alive	-0.608511	-0.808636	-0.285629	-0.367709
4567513	2014	29	21-40	White	II	T1	N1	M0	Regional	Yes	Yes	Alive	26	Alive	0.618093	0.837715	-0.230016	-0.248348
4568011	2014	28	21-40	Others	I	T1	N0	M0	Localized	Yes	No/Unknown	Alive	27	Alive	-0.320207	-0.262745	-0.285629	-0.367709
4568069	2013	54	41-60	Others	I	T1	N0	M0	Localized	Yes	No/Unknown	Alive	42	Alive	0.359727	0.194574	-0.285629	-0.367709
4568867	2014	36	21-40	Others	I	T1	N0	M0	Localized	Yes	No/Unknown	Alive	27	Alive	-0.320207	-0.262745	-0.285629	-0.367709
4569007	2014	32	21-40	White	III	T1	N3	M0	Regional	Yes	No/Unknown	Alive	4	Alive	0.954063	0.82003	-0.118788	-0.009625
4569292	2014	26	21-40	White	I	T1	N0	M0	Localized	Yes	No/Unknown	Alive	34	Alive	-0.608511	-0.808636	-0.285629	-0.367709
4569437	2014	42	41-60	Others	I	T1	N0	M0	Localized	Yes	No/Unknown	Alive	27	Alive	0.359727	0.194574	-0.285629	-0.367709
4570251	2013	34	21-40	Others	I	T1	N0	M0	Localized	Yes	No/Unknown	Alive	45	Alive	-0.320207	-0.262745	-0.285629	-0.367709
4570406	2014	57	41-60	Others	I	T2	N0	M0	Localized	Yes	No/Unknown	Alive	25	Alive	0.359727	0.315493	-0.082906	-0.175537
4570429	2014	23	21-40	White	I	T2	N0	M0	Localized	Yes	No/Unknown	Alive	26	Alive	-0.608511	-0.687716	-0.082906	-0.175537
4570752	2014	28	21-40	White	I	T1	N0	M0	Localized	Yes	No/Unknown	Alive	26	Alive	-0.608511	-0.808636	-0.285629	-0.367709
4571382	2014	31	21-40	White	I	T1	N0	M0	Localized	Yes	No/Unknown	Alive	17	Alive	-0.608511	-0.808636	-0.285629	-0.367709
4572036	2014	30	21-40	White	I	T1	N0	M0	Localized	Yes	No/Unknown	Alive	24	Alive	-0.608511	-0.808636	-0.285629	-0.367709
4572115	2014	39	21-40	White	III	T1	N3	M1	Distant	Yes	No/Unknown	Alive	25	Alive	1.8447	2.66871	1.91466	2.72339
4572337	2014	43	41-60	White	I	T1	N0	M0	Regional	Yes	No/Unknown	Alive	25	Alive	0.962056	0.506915	-0.285629	-0.367709
4573038	2013	24	21-40	Others	I	T1	N0	M0	Localized	Yes	No/Unknown	Alive	44	Alive	-0.320207	-0.262745	-0.285629	-0.367709
4573113	2014	25	21-40	White	I	T1	N0	M0	Localized	Yes	No/Unknown	Alive	24	Alive	-0.608511	-0.808636	-0.285629	-0.367709
4573334	2014	37	21-40	White	II	T2	N1	M0	Regional	Yes	No/Unknown	Alive	26	Alive	0.618093	0.555733	-0.027292	-0.056176
4573632	2014	45	41-60	White	I	T2	N0	M0	Localized	Yes	No/Unknown	Alive	20	Alive	0.071422	-0.230397	-0.082906	-0.175537
4573966	2013	28	21-40	White	I	T1	N0	M0	Localized	Yes	No/Unknown	Alive	4	Alive	-0.608511	-0.808636	-0.285629	-0.367709
4574200	2014	19	0-20	Others	I	T1	N0	M0	Localized	Yes	No/Unknown	Alive	24	Alive	-1.00014	-0.720064	-0.285629	-0.367709
4574515	2013	27	21-40	White	III	T2	N3	M1	Regional	Yes	No/Unknown	Alive	41	Alive	0.954063	1.9314	2.11738	2.91556
4574776	2014	19	0-20	White	I	T1	N0	M0	Localized	Yes	No/Unknown	Alive	22	Alive	-1.28845	-1.26595	-0.285629	-0.367709
4575166	2014	23	21-40	White	III	T2	N2	M0	Regional	Yes	No/Unknown	Alive	17	Alive	0.954063	0.94095	0.028322	0.063186
4575432	2013	20	0-20	White	I	T1	N0	M0	Localized	Yes	No/Unknown	Alive	36	Alive	-1.28845	-1.26595	-0.285629	-0.367709
4575588	2014	38	21-40	White	I	T1	N0	M0	Localized	Yes	No/Unknown	Alive	24	Alive	-0.608511	-0.808636	-0.285629	-0.367709
4575884	2014	23	21-40	White	I	T2	N0	M0	Regional	Yes	No/Unknown	Alive	12	Alive	0.282123	0.170516	-0.082906	-0.175537
4577098	2014	41	41-60	White	I	T2	N0	M0	Localized	Yes	No/Unknown	Alive	24	Alive	0.071422	-0.230397	-0.082906	-0.175537
4577919	2014	25	21-40	White	I	T1	N0	M0	Localized	Yes	No/Unknown	Alive	23	Alive	-0.608511	-0.808636	-0.285629	-0.367709
4579781	2015	24	21-40	White	I	T2	N0	M0	Localized	Yes	No/Unknown	Alive	23	Alive	-0.608511	-0.687716	-0.082906	-0.175537
4580552	2012	30	21-40	Others	I	T1	N0	M0	Localized	Yes	No/Unknown	Alive	58	Alive	-0.320207	-0.262745	-0.285629	-0.367709
4580974	2015	42	41-60	White	I	T1	N0	M0	Localized	Yes	No/Unknown	Alive	21	Alive	0.071422	-0.351317	-0.285629	-0.367709
4581502	2015	25	21-40	White	II	T1	N1	M0	Regional	Yes	No/Unknown	Alive	17	Alive	0.618093	0.434813	-0.230016	-0.248348
4581553	2015	31	21-40	White	I	T1	N0	M0	Localized	Yes	No/Unknown	Alive	21	Alive	-0.608511	-0.808636	-0.285629	-0.367709
4581976	2015	26	21-40	White	I	T2	N0	M0	Localized	Yes	No/Unknown	Alive	22	Alive	-0.608511	-0.687716	-0.082906	-0.175537
4582124	2015	20	0-20	White	I	T2	N0	M0	Localized	Yes	No/Unknown	Alive	21	Alive	-1.28845	-1.14504	-0.082906	-0.175537
4582699	2015	26	21-40	White	II	T1	N3	M0	Regional	Yes	No/Unknown	Alive	22	Alive	0.618093	0.434813	-0.118788	-0.009625
4584019	2014	39	21-40	White	III	T3	N3	M0	Regional	Yes	No/Unknown	Alive	34	Alive	0.954063	1.06187	0.286659	0.37472
4584178	2015	52	41-60	White	I	T2	N0	M0	Localized	Yes	No/Unknown	Alive	21	Alive	0.071422	-0.230397	-0.082906	-0.175537
4584265	2015	41	41-60	White	I	T1	N0	M0	Localized	Yes	No/Unknown	Alive	21	Alive	0.071422	-0.351317	-0.285629	-0.367709
4584427	2015	43	41-60	White	I	T1	N0	M0	Localized	Yes	No/Unknown	Alive	21	Alive	0.071422	-0.351317	-0.285629	-0.367709
4584882	2015	30	21-40	White	I	T1	N0	M0	Localized	Yes	No/Unknown	Alive	2	Alive	-0.608511	-0.808636	-0.285629	-0.367709
4585740	2015	49	41-60	White	I	T1	N0	M0	Localized	Yes	No/Unknown	Alive	17	Alive	0.071422	-0.351317	-0.285629	-0.367709
4586466	2015	37	21-40	White	I	T1	N0	M0	Localized	Yes	No/Unknown	Alive	21	Alive	-0.608511	-0.808636	-0.285629	-0.367709
4587305	2015	34	21-40	Others	I	T2	N0	M0	Localized	Yes	No/Unknown	Alive	21	Alive	-0.320207	-0.141825	-0.082906	-0.175537
4588376	2015	40	21-40	White	I	T1	N0	M0	Localized	Yes	No/Unknown	Alive	22	Alive	-0.608511	-0.808636	-0.285629	-0.367709
4588660	2015	39	21-40	White	I	T2	N0	M0	Localized	Yes	No/Unknown	Alive	19	Alive	-0.608511	-0.687716	-0.082906	-0.175537
4588785	2015	32	21-40	White	I	T1	N0	M0	Localized	Yes	No/Unknown	Alive	18	Alive	-0.608511	-0.808636	-0.285629	-0.367709
4589465	2014	52	41-60	White	I	T2	N0	M0	Regional	Yes	No/Unknown	Alive	26	Alive	0.962056	0.627835	-0.082906	-0.175537
4589826	2015	28	21-40	White	I	T1	N0	M0	Localized	Yes	No/Unknown	Alive	20	Alive	-0.608511	-0.808636	-0.285629	-0.367709
4589844	2015	41	41-60	White	II	T1	N1	M0	Regional	Yes	No/Unknown	Alive	21	Alive	1.29803	0.892132	-0.230016	-0.248348
4590492	2015	25	21-40	White	III	T2	N1	M1	Distant	Yes	No/Unknown	Alive	20	Alive	1.8447	2.78963	2.00616	2.67684
4593713	2015	54	41-60	White	II	T2	N1	M0	Regional	Yes	Yes	Alive	19	Alive	1.29803	1.41595	-0.027292	-0.056176
4594803	2015	34	21-40	Others	I	T1	N0	M0	Localized	Yes	No/Unknown	Alive	18	Alive	-0.320207	-0.262745	-0.285629	-0.367709
4595064	2015	47	41-60	White	I	T1	N0	M0	Localized	Yes	No/Unknown	Alive	18	Alive	0.071422	-0.351317	-0.285629	-0.367709
4596256	2015	27	21-40	White	I	T1	N0	M0	Localized	Yes	No/Unknown	Alive	5	Alive	-0.608511	-0.808636	-0.285629	-0.367709
4596919	2015	23	21-40	Others	I	T1	N0	M0	Localized	Yes	No/Unknown	Alive	17	Alive	-0.320207	-0.262745	-0.285629	-0.367709
4597133	2014	23	21-40	White	I	T1	N0	M0	Localized	Yes	No/Unknown	Alive	25	Alive	-0.608511	-0.808636	-0.285629	-0.367709
4598182	2015	27	21-40	White	I	T2	N0	M0	Localized	Yes	No/Unknown	Alive	20	Alive	-0.608511	-0.687716	-0.082906	-0.175537
4598494	2015	40	21-40	White	II	T1	N1	M0	Regional	Yes	No/Unknown	Alive	19	Alive	0.618093	0.434813	-0.230016	-0.248348
4598557	2015	42	41-60	White	I	T1	N0	M0	Localized	Yes	No/Unknown	Alive	17	Alive	0.071422	-0.351317	-0.285629	-0.367709
4598684	2015	23	21-40	White	I	T1	N0	M0	Localized	Yes	No/Unknown	Alive	16	Alive	-0.608511	-0.808636	-0.285629	-0.367709
4598897	2015	50	41-60	White	III	T2	N3	M0	Regional	Yes	No/Unknown	Testis	16	Dead	1.634	1.39827	0.083935	0.182548
4600090	2015	49	41-60	White	II	T1	N2	M0	Regional	Yes	No/Unknown	Alive	5	Alive	1.29803	0.892132	-0.174402	-0.128986
4600190	2015	69	>60	White	I	T1	N0	M0	Regional	Yes	No/Unknown	Other Cause of Death	4	Dead	1.64199	0.964234	-0.285629	-0.367709
4600284	2015	52	41-60	White	III	T1	N1	M1	Distant	Yes	No/Unknown	Alive	17	Alive	2.52463	3.12603	1.80343	2.48467
4600369	2015	27	21-40	White	I	T1	N0	M0	Localized	Yes	No/Unknown	Alive	16	Alive	-0.608511	-0.808636	-0.285629	-0.367709
4600592	2015	33	21-40	White	I	T1	N0	M0	Localized	Yes	No/Unknown	Alive	17	Alive	-0.608511	-0.808636	-0.285629	-0.367709
4601244	2015	27	21-40	White	I	T1	N0	M0	Localized	Yes	No/Unknown	Alive	16	Alive	-0.608511	-0.808636	-0.285629	-0.367709
4602207	2015	61	>60	White	I	T1	N0	M0	Localized	Yes	No/Unknown	Alive	16	Alive	0.751355	0.106002	-0.285629	-0.367709
4602259	2015	53	41-60	White	I	T1	N0	M0	Localized	Yes	No/Unknown	Alive	17	Alive	0.071422	-0.351317	-0.285629	-0.367709
4603372	2015	25	21-40	Others	III	T1	N1	M1	Distant	Yes	No/Unknown	Alive	20	Alive	2.133	3.2146	1.80343	2.48467
4604199	2015	44	41-60	White	I	T1	N0	M0	Localized	Yes	No/Unknown	Alive	14	Alive	0.071422	-0.351317	-0.285629	-0.367709
4604236	2015	58	41-60	White	I	T1	N0	M0	Localized	Yes	No/Unknown	Alive	15	Alive	0.071422	-0.351317	-0.285629	-0.367709
4604288	2015	24	21-40	White	II	T1	N1	M0	Regional	Yes	No/Unknown	Alive	5	Alive	0.618093	0.434813	-0.230016	-0.248348
4604562	2015	49	41-60	White	I	T2	N0	M0	Localized	Yes	No/Unknown	Alive	16	Alive	0.071422	-0.230397	-0.082906	-0.175537
4606986	2015	38	21-40	White	I	T1	N0	M0	Localized	Yes	No/Unknown	Alive	15	Alive	-0.608511	-0.808636	-0.285629	-0.367709
4607272	2015	25	21-40	White	I	T1	N0	M0	Localized	Yes	No/Unknown	Alive	16	Alive	-0.608511	-0.808636	-0.285629	-0.367709
4607888	2015	26	21-40	White	I	T2	N0	M0	Localized	Yes	No/Unknown	Alive	16	Alive	-0.608511	-0.687716	-0.082906	-0.175537
4608649	2015	37	21-40	White	I	T1	N0	M0	Localized	Yes	No/Unknown	Alive	15	Alive	-0.608511	-0.808636	-0.285629	-0.367709
4608662	2015	52	41-60	White	III	T2	N1	M1	Distant	Yes	No/Unknown	Alive	16	Alive	2.52463	3.24695	2.00616	2.67684
4608827	2015	23	21-40	Others	I	T1	N0	M0	Localized	Yes	No/Unknown	Alive	20	Alive	-0.320207	-0.262745	-0.285629	-0.367709
4610823	2015	22	21-40	White	II	T2	N2	M0	Regional	Yes	No/Unknown	Alive	15	Alive	0.618093	0.555733	0.028322	0.063186
4611460	2014	21	21-40	White	I	T1	N0	M0	Localized	Yes	No/Unknown	Alive	26	Alive	-0.608511	-0.808636	-0.285629	-0.367709
4611664	2015	34	21-40	White	II	T2	N2	M0	Regional	Yes	No/Unknown	Alive	14	Alive	0.618093	0.555733	0.028322	0.063186
4612003	2015	37	21-40	White	I	T1	N0	M0	Localized	Yes	No/Unknown	Alive	14	Alive	-0.608511	-0.808636	-0.285629	-0.367709
4612336	2015	19	0-20	White	I	T2	N0	M0	Localized	Yes	No/Unknown	Alive	14	Alive	-1.28845	-1.14504	-0.082906	-0.175537
4613877	2015	48	41-60	White	I	T2	N0	M0	Localized	Yes	No/Unknown	Alive	12	Alive	0.071422	-0.230397	-0.082906	-0.175537
4615040	2015	22	21-40	Others	I	T1	N0	M0	Localized	Yes	No/Unknown	Alive	12	Alive	-0.320207	-0.262745	-0.285629	-0.367709
4615109	2015	21	21-40	Others	II	T2	N1	M0	Regional	Yes	No/Unknown	Alive	14	Alive	0.906397	1.10162	-0.027292	-0.056176
4615160	2015	35	21-40	White	I	T1	N0	M0	Localized	Yes	No/Unknown	Alive	11	Alive	-0.608511	-0.808636	-0.285629	-0.367709
4615525	2015	19	0-20	White	I	T2	N0	M0	Localized	Yes	No/Unknown	Alive	14	Alive	-1.28845	-1.14504	-0.082906	-0.175537
4615680	2015	34	21-40	White	I	T1	N0	M0	Localized	Yes	No/Unknown	Alive	13	Alive	-0.608511	-0.808636	-0.285629	-0.367709
4616633	2015	62	>60	White	I	T1	N0	M0	Localized	Yes	No/Unknown	Alive	15	Alive	0.751355	0.106002	-0.285629	-0.367709
4618204	2014	77	>60	White	I	T1	N0	M0	Localized	Yes	No/Unknown	Alive	32	Alive	0.751355	0.106002	-0.285629	-0.367709
4618648	2015	37	21-40	White	I	T1	N0	M0	Localized	Yes	No/Unknown	Alive	14	Alive	-0.608511	-0.808636	-0.285629	-0.367709
4619402	2014	50	41-60	White	I	T1	N0	M0	Localized	Yes	No/Unknown	Alive	28	Alive	0.071422	-0.351317	-0.285629	-0.367709
4619419	2015	36	21-40	White	I	T1	N0	M0	Localized	Yes	No/Unknown	Alive	13	Alive	-0.608511	-0.808636	-0.285629	-0.367709
4619723	2015	34	21-40	Black	I	T1	N0	M0	Localized	Yes	No/Unknown	Alive	13	Alive	-0.464359	-0.53569	-0.285629	-0.367709
4619935	2014	52	41-60	White	I	T1	N0	M0	Localized	Yes	No/Unknown	Alive	27	Alive	0.071422	-0.351317	-0.285629	-0.367709
4620098	2014	65	>60	White	I	T1	N0	M0	Localized	Yes	No/Unknown	Alive	34	Alive	0.751355	0.106002	-0.285629	-0.367709
4621277	2015	19	0-20	White	II	T1	N1	M0	Regional	Yes	No/Unknown	Alive	12	Alive	-0.061841	-0.022506	-0.230016	-0.248348
4621279	2015	39	21-40	White	III	T2	N3	M1	Distant	Yes	No/Unknown	Alive	13	Alive	1.8447	2.78963	2.11738	2.91556
4636641	2014	28	21-40	White	I	T2	N0	M0	Localized	Yes	No/Unknown	Alive	31	Alive	-0.608511	-0.687716	-0.082906	-0.175537
4642170	2015	34	21-40	White	III	T1	N0	M1	Distant	Yes	No/Unknown	Testis	14	Dead	1.8447	2.66871	1.74782	2.36531
4645845	2015	31	21-40	Others	I	T2	N0	M0	Localized	Yes	No/Unknown	Alive	0	Alive	-0.320207	-0.141825	-0.082906	-0.175537
4648251	2015	38	21-40	Others	I	T1	N0	M0	Localized	Yes	No/Unknown	Alive	20	Alive	-0.320207	-0.262745	-0.285629	-0.367709
4665413	2015	31	21-40	White	I	T1	N0	M0	Localized	Yes	No/Unknown	Alive	13	Alive	-0.608511	-0.808636	-0.285629	-0.367709
4685515	2015	58	41-60	White	I	T2	N0	M0	Localized	Yes	No/Unknown	Alive	20	Alive	0.071422	-0.230397	-0.082906	-0.175537
7966379	2004	45	41-60	White	I	T1	N0	M0	Localized	Yes	Yes	Alive	154	Alive	0.071422	0.051585	-0.285629	-0.367709
7967508	2004	38	21-40	White	I	T2	N0	M0	Localized	Yes	No/Unknown	Alive	142	Alive	-0.608511	-0.687716	-0.082906	-0.175537
7967837	2004	22	21-40	White	I	T1	N0	M0	Localized	Yes	No/Unknown	Chronic Liver Disease and Cirrhosis	104	Dead	-0.608511	-0.808636	-0.285629	-0.367709
7968148	2004	35	21-40	White	I	T2	N0	M0	Localized	Yes	Yes	Alive	151	Alive	-0.608511	-0.284814	-0.082906	-0.175537
7968727	2004	37	21-40	White	I	T2	N0	M0	Localized	Yes	No/Unknown	Alive	146	Alive	-0.608511	-0.687716	-0.082906	-0.175537
7974377	2004	25	21-40	White	II	T1	N1	M0	Regional	Yes	No/Unknown	Alive	9	Alive	0.618093	0.434813	-0.230016	-0.248348
7974403	2004	44	41-60	White	I	T2	N0	M0	Localized	Yes	No/Unknown	Alive	147	Alive	0.071422	-0.230397	-0.082906	-0.175537
8366763	2004	38	21-40	White	III	T1	N2	M0	Regional	Yes	No/Unknown	Alive	152	Alive	0.954063	0.82003	-0.174402	-0.128986
8367521	2004	26	21-40	White	I	T1	N0	M0	Localized	Yes	No/Unknown	Alive	155	Alive	-0.608511	-0.808636	-0.285629	-0.367709
8367678	2004	44	41-60	White	I	T2	N0	M0	Localized	Yes	Yes	Alive	149	Alive	0.071422	0.172504	-0.082906	-0.175537
8367760	2004	27	21-40	White	I	T2	N0	M0	Localized	Yes	Yes	Alive	146	Alive	-0.608511	-0.284814	-0.082906	-0.175537
8367924	2004	37	21-40	White	I	T1	N0	M0	Localized	Yes	No/Unknown	Alive	150	Alive	-0.608511	-0.808636	-0.285629	-0.367709
8368143	2004	18	0-20	White	II	T2	N2	M0	Regional	Yes	No/Unknown	Alive	150	Alive	-0.061841	0.098414	0.028322	0.063186
8368380	2004	30	21-40	White	I	T2	N0	M0	Localized	Yes	No/Unknown	Alive	151	Alive	-0.608511	-0.687716	-0.082906	-0.175537
8368521	2004	45	41-60	White	I	T1	N0	M0	Localized	Yes	Yes	Alive	148	Alive	0.071422	0.051585	-0.285629	-0.367709
8368870	2004	31	21-40	White	I	T2	N0	M0	Localized	Yes	Yes	Alive	150	Alive	-0.608511	-0.284814	-0.082906	-0.175537
8369193	2004	29	21-40	White	I	T1	N0	M0	Localized	Yes	No/Unknown	Alive	149	Alive	-0.608511	-0.808636	-0.285629	-0.367709
8369259	2004	16	0-20	White	I	T1	N0	M0	Localized	Yes	No/Unknown	Alive	150	Alive	-1.28845	-1.26595	-0.285629	-0.367709
8369380	2004	28	21-40	White	III	T2	N1	M0	Regional	Yes	Yes	Alive	151	Alive	0.954063	1.34385	-0.027292	-0.056176
8369492	2004	40	21-40	White	I	T1	N0	M0	Localized	Yes	Yes	Alive	149	Alive	-0.608511	-0.405734	-0.285629	-0.367709
8370737	2004	20	0-20	Others	II	T2	N2	M0	Regional	Yes	No/Unknown	Alive	154	Alive	0.226464	0.644305	0.028322	0.063186
8372283	2004	36	21-40	White	I	T1	N0	M0	Localized	Yes	Yes	Alive	145	Alive	-0.608511	-0.405734	-0.285629	-0.367709
8372805	2004	43	41-60	White	I	T1	N0	M0	Localized	Yes	Yes	Alive	150	Alive	0.071422	0.051585	-0.285629	-0.367709
8372971	2004	34	21-40	White	I	T1	N0	M0	Localized	Yes	Yes	Alive	151	Alive	-0.608511	-0.405734	-0.285629	-0.367709
8373052	2004	41	41-60	White	I	T1	N0	M0	Localized	Yes	Yes	Alive	146	Alive	0.071422	0.051585	-0.285629	-0.367709
8373163	2004	33	21-40	White	I	T1	N0	M0	Localized	Yes	Yes	Alive	150	Alive	-0.608511	-0.405734	-0.285629	-0.367709
8373724	2004	42	41-60	White	I	T2	N0	M0	Localized	Yes	Yes	Alive	146	Alive	0.071422	0.172504	-0.082906	-0.175537
8374111	2004	27	21-40	Black	I	T1	N0	M0	Localized	Yes	Yes	Alive	149	Alive	-0.464359	-0.132789	-0.285629	-0.367709
8374453	2004	53	41-60	White	II	T1	N1	M0	Distant	Yes	No/Unknown	Alive	155	Alive	2.18866	1.75036	-0.230016	-0.248348
8374642	2004	32	21-40	White	I	T1	N0	M0	Localized	Yes	No/Unknown	Alive	152	Alive	-0.608511	-0.808636	-0.285629	-0.367709
8375264	2004	37	21-40	White	I	T1	N0	M0	Regional	Yes	Yes	Alive	153	Alive	0.282123	0.452498	-0.285629	-0.367709
8376168	2004	44	41-60	White	II	T2	N1	M0	Regional	Yes	No/Unknown	Alive	148	Alive	1.29803	1.01305	-0.027292	-0.056176
8376233	2004	38	21-40	White	I	T2	N0	M0	Localized	Yes	Yes	Alive	153	Alive	-0.608511	-0.284814	-0.082906	-0.175537
8376610	2004	20	0-20	White	II	T1	N3	M0	Regional	Yes	No/Unknown	Alive	147	Alive	-0.061841	-0.022506	-0.118788	-0.009625
8377709	2004	29	21-40	White	I	T1	N0	M0	Localized	Yes	No/Unknown	Alive	148	Alive	-0.608511	-0.808636	-0.285629	-0.367709
8378147	2004	42	41-60	White	I	T1	N0	M0	Localized	Yes	Yes	Alive	151	Alive	0.071422	0.051585	-0.285629	-0.367709
8378443	2004	24	21-40	White	III	T1	N2	M0	Regional	Yes	No/Unknown	Alive	152	Alive	0.954063	0.82003	-0.174402	-0.128986
8378769	2004	24	21-40	White	I	T2	N0	M0	Localized	Yes	No/Unknown	Alive	152	Alive	-0.608511	-0.687716	-0.082906	-0.175537
8378959	2004	24	21-40	White	I	T1	N0	M0	Localized	Yes	No/Unknown	Alive	149	Alive	-0.608511	-0.808636	-0.285629	-0.367709
8379046	2004	38	21-40	White	I	T2	N0	M0	Regional	Yes	No/Unknown	Alive	150	Alive	0.282123	0.170516	-0.082906	-0.175537
8379100	2004	42	41-60	White	II	T2	N1	M0	Regional	Yes	No/Unknown	Alive	145	Alive	1.29803	1.01305	-0.027292	-0.056176
8379346	2004	32	21-40	White	I	T2	N0	M0	Localized	Yes	No/Unknown	Alive	152	Alive	-0.608511	-0.687716	-0.082906	-0.175537
8379688	2004	43	41-60	White	I	T2	N0	M0	Localized	Yes	No/Unknown	Diseases of Heart	115	Dead	0.071422	-0.230397	-0.082906	-0.175537
8381517	2004	34	21-40	White	I	T1	N0	M0	Localized	Yes	Yes	Alive	147	Alive	-0.608511	-0.405734	-0.285629	-0.367709
8381772	2004	24	21-40	White	II	T1	N1	M0	Regional	Yes	Yes	Alive	149	Alive	0.618093	0.837715	-0.230016	-0.248348
8382402	2004	23	21-40	White	III	T1	N1	M0	Regional	Yes	No/Unknown	Alive	148	Alive	0.954063	0.82003	-0.230016	-0.248348
8382404	2004	41	41-60	White	I	T2	N0	M0	Localized	Yes	Yes	Alive	140	Alive	0.071422	0.172504	-0.082906	-0.175537
8382647	2004	42	41-60	White	III	T1	N2	M1	Distant	Yes	No/Unknown	Alive	154	Alive	2.52463	3.12603	1.85905	2.60403
8382732	2004	25	21-40	White	I	T2	N0	M0	Localized	Yes	No/Unknown	Alive	148	Alive	-0.608511	-0.687716	-0.082906	-0.175537
8382736	2004	36	21-40	White	I	T1	N0	M0	Localized	Yes	No/Unknown	Alive	149	Alive	-0.608511	-0.808636	-0.285629	-0.367709
8383575	2004	31	21-40	White	II	T2	N2	M0	Regional	Yes	No/Unknown	Testis	14	Dead	0.618093	0.555733	0.028322	0.063186
8383739	2004	39	21-40	White	I	T1	N0	M0	Localized	Yes	No/Unknown	Alive	151	Alive	-0.608511	-0.808636	-0.285629	-0.367709
8384151	2004	24	21-40	White	I	T2	N0	M0	Localized	Yes	Yes	Alive	145	Alive	-0.608511	-0.284814	-0.082906	-0.175537
8384764	2004	29	21-40	White	I	T1	N0	M0	Localized	Yes	Yes	Alive	145	Alive	-0.608511	-0.405734	-0.285629	-0.367709
8385085	2004	37	21-40	White	I	T2	N0	M0	Localized	Yes	No/Unknown	Alive	147	Alive	-0.608511	-0.687716	-0.082906	-0.175537
8385303	2004	24	21-40	White	I	T1	N0	M0	Localized	Yes	No/Unknown	Alive	152	Alive	-0.608511	-0.808636	-0.285629	-0.367709
8385329	2004	28	21-40	White	I	T2	N0	M0	Localized	Yes	No/Unknown	Alive	154	Alive	-0.608511	-0.687716	-0.082906	-0.175537
8385493	2004	34	21-40	White	I	T1	N0	M0	Localized	Yes	No/Unknown	Alive	145	Alive	-0.608511	-0.808636	-0.285629	-0.367709
8385534	2004	20	0-20	White	I	T3	N0	M0	Regional	Yes	No/Unknown	Alive	148	Alive	-0.397811	-0.165883	0.119817	0.016635
8385540	2004	25	21-40	White	I	T2	N0	M0	Localized	Yes	Yes	Alive	153	Alive	-0.608511	-0.284814	-0.082906	-0.175537
8385615	2004	23	21-40	White	I	T2	N0	M0	Localized	Yes	No/Unknown	Alive	151	Alive	-0.608511	-0.687716	-0.082906	-0.175537
8385795	2004	34	21-40	White	I	T1	N0	M0	Localized	Yes	Yes	Alive	153	Alive	-0.608511	-0.405734	-0.285629	-0.367709
8385879	2004	40	21-40	White	I	T1	N0	M0	Localized	Yes	No/Unknown	Alive	148	Alive	-0.608511	-0.808636	-0.285629	-0.367709
8386283	2004	21	21-40	White	I	T1	N0	M0	Localized	Yes	Yes	Alive	150	Alive	-0.608511	-0.405734	-0.285629	-0.367709
8386297	2004	36	21-40	White	I	T1	N0	M0	Localized	Yes	Yes	Alive	141	Alive	-0.608511	-0.405734	-0.285629	-0.367709
8387864	2005	43	41-60	White	I	T1	N0	M0	Localized	Yes	Yes	Alive	132	Alive	0.071422	0.051585	-0.285629	-0.367709
8388321	2005	20	0-20	Others	I	T1	N0	M0	Localized	Yes	No/Unknown	Alive	135	Alive	-1.00014	-0.720064	-0.285629	-0.367709
8388461	2005	36	21-40	White	I	T1	N0	M0	Localized	Yes	No/Unknown	Alive	135	Alive	-0.608511	-0.808636	-0.285629	-0.367709
8388905	2005	22	21-40	White	I	T2	N0	M0	Localized	Yes	Yes	Alive	135	Alive	-0.608511	-0.284814	-0.082906	-0.175537
8388931	2005	37	21-40	White	I	T1	N0	M0	Localized	Yes	Yes	Alive	134	Alive	-0.608511	-0.405734	-0.285629	-0.367709
8388941	2005	27	21-40	White	I	T1	N0	M0	Regional	Yes	No/Unknown	Alive	143	Alive	0.282123	0.049596	-0.285629	-0.367709
8389010	2005	20	0-20	White	I	T1	N0	M0	Localized	Yes	No/Unknown	Alive	138	Alive	-1.28845	-1.26595	-0.285629	-0.367709
8389058	2005	27	21-40	White	III	T1	N1	M0	Regional	Yes	No/Unknown	Alive	138	Alive	0.954063	0.82003	-0.230016	-0.248348
8389164	2005	25	21-40	White	II	T2	N1	M0	Regional	Yes	No/Unknown	Alive	137	Alive	0.618093	0.555733	-0.027292	-0.056176
8389277	2005	26	21-40	White	I	T1	N0	M0	Localized	Yes	Yes	Alive	143	Alive	-0.608511	-0.405734	-0.285629	-0.367709
8389434	2005	26	21-40	White	I	T2	N0	M0	Localized	Yes	No/Unknown	Alive	142	Alive	-0.608511	-0.687716	-0.082906	-0.175537
8389778	2005	34	21-40	White	I	T1	N0	M0	Localized	Yes	No/Unknown	Alive	136	Alive	-0.608511	-0.808636	-0.285629	-0.367709
8390899	2005	39	21-40	White	I	T1	N0	M0	Localized	Yes	Yes	Alive	138	Alive	-0.608511	-0.405734	-0.285629	-0.367709
8390924	2005	35	21-40	White	I	T1	N0	M0	Localized	Yes	No/Unknown	Alive	142	Alive	-0.608511	-0.808636	-0.285629	-0.367709
8391077	2005	35	21-40	White	I	T2	N0	M0	Localized	Yes	Yes	Alive	141	Alive	-0.608511	-0.284814	-0.082906	-0.175537
8391558	2005	44	41-60	White	I	T1	N0	M0	Localized	Yes	No/Unknown	Alive	141	Alive	0.071422	-0.351317	-0.285629	-0.367709
8391609	2005	44	41-60	White	I	T1	N0	M0	Regional	Yes	No/Unknown	Alive	142	Alive	0.962056	0.506915	-0.285629	-0.367709
8391793	2005	39	21-40	White	II	T1	N2	M0	Regional	Yes	No/Unknown	Alive	140	Alive	0.618093	0.434813	-0.174402	-0.128986
8391913	2005	42	41-60	White	I	T1	N0	M0	Localized	Yes	No/Unknown	Testis	17	Dead	0.071422	-0.351317	-0.285629	-0.367709
8392956	2005	52	41-60	White	I	T2	N0	M0	Localized	Yes	No/Unknown	Alive	141	Alive	0.071422	-0.230397	-0.082906	-0.175537
8393074	2005	25	21-40	White	III	T1	N3	M1	Distant	Yes	No/Unknown	Alive	138	Alive	1.8447	2.66871	1.91466	2.72339
8393790	2005	31	21-40	White	I	T2	N0	M0	Localized	Yes	No/Unknown	Alive	140	Alive	-0.608511	-0.687716	-0.082906	-0.175537
8394158	2005	41	41-60	White	I	T1	N0	M0	Localized	Yes	Yes	Alive	136	Alive	0.071422	0.051585	-0.285629	-0.367709
8394218	2005	42	41-60	White	I	T1	N0	M0	Localized	Yes	No/Unknown	Alive	133	Alive	0.071422	-0.351317	-0.285629	-0.367709
8397525	2005	19	0-20	White	III	T1	N0	M1	Distant	Yes	No/Unknown	Testis	7	Dead	1.16476	2.21139	1.74782	2.36531
8397927	2005	45	41-60	White	I	T1	N0	M0	Localized	Yes	Yes	Alive	138	Alive	0.071422	0.051585	-0.285629	-0.367709
8399004	2005	29	21-40	White	I	T1	N0	M0	Localized	Yes	Yes	Alive	138	Alive	-0.608511	-0.405734	-0.285629	-0.367709
8399946	2005	38	21-40	White	I	T1	N0	M0	Localized	Yes	No/Unknown	Alive	5	Alive	-0.608511	-0.808636	-0.285629	-0.367709
8408604	2005	40	21-40	White	I	T2	N0	M0	Localized	Yes	No/Unknown	Alive	142	Alive	-0.608511	-0.687716	-0.082906	-0.175537
8408633	2005	37	21-40	White	I	T1	N0	M0	Localized	Yes	Yes	Alive	138	Alive	-0.608511	-0.405734	-0.285629	-0.367709
8409172	2005	29	21-40	White	I	T1	N0	M0	Localized	Yes	No/Unknown	Alive	140	Alive	-0.608511	-0.808636	-0.285629	-0.367709
8409526	2005	33	21-40	White	I	T2	N0	M0	Localized	Yes	No/Unknown	Alive	135	Alive	-0.608511	-0.687716	-0.082906	-0.175537
8410143	2005	24	21-40	White	I	T1	N0	M0	Localized	Yes	No/Unknown	Alive	137	Alive	-0.608511	-0.808636	-0.285629	-0.367709
8410358	2005	53	41-60	White	I	T2	N0	M0	Localized	Yes	No/Unknown	Alive	132	Alive	0.071422	-0.230397	-0.082906	-0.175537
8410371	2005	41	41-60	White	II	T3	N1	M0	Regional	Yes	No/Unknown	Alive	133	Alive	1.29803	1.13397	0.175431	0.135997
8410520	2005	32	21-40	White	I	T1	N0	M0	Localized	Yes	No/Unknown	Suicide and Self-Inflicted Injury	85	Dead	-0.608511	-0.808636	-0.285629	-0.367709
8412539	2005	27	21-40	White	I	T1	N0	M0	Localized	Yes	Yes	Alive	143	Alive	-0.608511	-0.405734	-0.285629	-0.367709
8413602	2005	45	41-60	White	I	T1	N0	M0	Localized	Yes	No/Unknown	Alive	132	Alive	0.071422	-0.351317	-0.285629	-0.367709
8414289	2005	43	41-60	White	I	T2	N0	M0	Localized	Yes	No/Unknown	Alive	134	Alive	0.071422	-0.230397	-0.082906	-0.175537
8414372	2005	22	21-40	White	II	T2	N2	M0	Regional	Yes	No/Unknown	Alive	141	Alive	0.618093	0.555733	0.028322	0.063186
8415171	2005	57	41-60	White	I	T1	N0	M0	Localized	Yes	Yes	Alive	132	Alive	0.071422	0.051585	-0.285629	-0.367709
8415331	2005	25	21-40	White	I	T1	N0	M0	Localized	Yes	No/Unknown	Alive	139	Alive	-0.608511	-0.808636	-0.285629	-0.367709
8416057	2005	54	41-60	White	I	T1	N0	M0	Localized	Yes	Yes	Alive	132	Alive	0.071422	0.051585	-0.285629	-0.367709
8417258	2004	29	21-40	White	III	T2	N1	M0	Distant	Yes	No/Unknown	Alive	139	Alive	1.8447	1.79918	-0.027292	-0.056176
8417899	2005	24	21-40	White	I	T2	N0	M0	Localized	Yes	No/Unknown	Alive	132	Alive	-0.608511	-0.687716	-0.082906	-0.175537
8418711	2005	23	21-40	White	I	T2	N0	M0	Localized	Yes	Yes	Alive	141	Alive	-0.608511	-0.284814	-0.082906	-0.175537
8418810	2005	25	21-40	White	I	T2	N0	M0	Localized	Yes	No/Unknown	Alive	140	Alive	-0.608511	-0.687716	-0.082906	-0.175537
8419523	2005	33	21-40	White	I	T1	N0	M0	Localized	Yes	No/Unknown	Alive	0	Alive	-0.608511	-0.808636	-0.285629	-0.367709
8420079	2005	31	21-40	White	I	T1	N0	M0	Localized	Yes	No/Unknown	Alive	138	Alive	-0.608511	-0.808636	-0.285629	-0.367709
8421265	2005	28	21-40	White	II	T2	N2	M0	Regional	Yes	No/Unknown	Alive	140	Alive	0.618093	0.555733	0.028322	0.063186
8422103	2004	42	41-60	White	I	T1	N0	M0	Localized	Yes	Yes	Alive	144	Alive	0.071422	0.051585	-0.285629	-0.367709
8422491	2004	41	41-60	White	I	T1	N0	M0	Localized	Yes	Yes	Alive	154	Alive	0.071422	0.051585	-0.285629	-0.367709
8423747	2004	22	21-40	White	I	T1	N0	M0	Localized	Yes	No/Unknown	Alive	145	Alive	-0.608511	-0.808636	-0.285629	-0.367709
8424410	2006	27	21-40	White	III	T1	N2	M0	Regional	Yes	No/Unknown	Alive	131	Alive	0.954063	0.82003	-0.174402	-0.128986
8424636	2006	46	41-60	White	I	T2	N0	M0	Localized	Yes	Yes	Alive	109	Alive	0.071422	0.172504	-0.082906	-0.175537
8424761	2006	39	21-40	White	I	T2	N0	M0	Localized	Yes	No/Unknown	Alive	128	Alive	-0.608511	-0.687716	-0.082906	-0.175537
8424770	2006	32	21-40	Black	I	T1	N0	M0	Localized	Yes	No/Unknown	Alive	125	Alive	-0.464359	-0.53569	-0.285629	-0.367709
8425201	2006	42	41-60	White	I	T1	N0	M0	Localized	Yes	No/Unknown	Alive	115	Alive	0.071422	-0.351317	-0.285629	-0.367709
8425243	2006	41	41-60	White	I	T1	N0	M0	Localized	Yes	No/Unknown	Alive	129	Alive	0.071422	-0.351317	-0.285629	-0.367709
8425311	2006	35	21-40	White	I	T1	N0	M0	Localized	Yes	No/Unknown	Alive	123	Alive	-0.608511	-0.808636	-0.285629	-0.367709
8425368	2006	33	21-40	White	I	T2	N0	M0	Regional	Yes	No/Unknown	Alive	124	Alive	0.282123	0.170516	-0.082906	-0.175537
8425410	2006	37	21-40	White	I	T1	N0	M0	Localized	Yes	Yes	Alive	130	Alive	-0.608511	-0.405734	-0.285629	-0.367709
8425427	2006	37	21-40	White	I	T1	N0	M0	Localized	Yes	Yes	Alive	117	Alive	-0.608511	-0.405734	-0.285629	-0.367709
8425432	2006	47	41-60	White	II	T2	N1	M0	Regional	Yes	Yes	Alive	126	Alive	1.29803	1.41595	-0.027292	-0.056176
8425687	2006	34	21-40	White	I	T2	N0	M0	Regional	Yes	Yes	Alive	123	Alive	0.282123	0.573417	-0.082906	-0.175537
8425733	2006	39	21-40	White	I	T2	N0	M0	Localized	Yes	Yes	Alive	126	Alive	-0.608511	-0.284814	-0.082906	-0.175537
8426082	2006	35	21-40	White	I	T1	N0	M0	Localized	Yes	No/Unknown	Alive	128	Alive	-0.608511	-0.808636	-0.285629	-0.367709
8426118	2006	25	21-40	White	I	T1	N0	M0	Regional	Yes	No/Unknown	Alive	130	Alive	0.282123	0.049596	-0.285629	-0.367709
8426232	2006	28	21-40	White	I	T1	N0	M0	Regional	Yes	No/Unknown	Alive	123	Alive	0.282123	0.049596	-0.285629	-0.367709
8426479	2006	70	>60	Black	I	T2	N0	M0	Regional	Yes	No/Unknown	Alive	129	Alive	1.78614	1.3581	-0.082906	-0.175537
8426645	2006	36	21-40	White	I	T1	N0	M0	Localized	Yes	Yes	Alive	126	Alive	-0.608511	-0.405734	-0.285629	-0.367709
8426714	2006	27	21-40	White	I	T2	N0	M0	Localized	Yes	Yes	Alive	126	Alive	-0.608511	-0.284814	-0.082906	-0.175537
8427367	2006	32	21-40	White	I	T1	N0	M0	Localized	Yes	Yes	Alive	127	Alive	-0.608511	-0.405734	-0.285629	-0.367709
8427514	2006	29	21-40	White	I	T2	N0	M0	Localized	Yes	Yes	Alive	126	Alive	-0.608511	-0.284814	-0.082906	-0.175537
8427542	2006	25	21-40	White	I	T1	N0	M0	Localized	Yes	Yes	Alive	104	Alive	-0.608511	-0.405734	-0.285629	-0.367709
8427554	2006	42	41-60	White	I	T2	N0	M0	Regional	Yes	Yes	Alive	122	Alive	0.962056	1.03074	-0.082906	-0.175537
8427630	2006	40	21-40	White	I	T1	N0	M0	Localized	Yes	Yes	Alive	124	Alive	-0.608511	-0.405734	-0.285629	-0.367709
8427795	2006	21	21-40	White	II	T1	N1	M0	Regional	Yes	Yes	Alive	124	Alive	0.618093	0.837715	-0.230016	-0.248348
8428050	2006	54	41-60	White	I	T1	N0	M0	Localized	Yes	Yes	Alive	131	Alive	0.071422	0.051585	-0.285629	-0.367709
8428063	2006	45	41-60	White	III	T3	N3	M0	Regional	Yes	No/Unknown	Alive	127	Alive	1.634	1.51919	0.286659	0.37472
8428079	2006	39	21-40	White	I	T1	N0	M0	Localized	Yes	No/Unknown	Alive	127	Alive	-0.608511	-0.808636	-0.285629	-0.367709
8428084	2006	21	21-40	White	II	T1	N2	M0	Regional	Yes	No/Unknown	Alive	127	Alive	0.618093	0.434813	-0.174402	-0.128986
8428087	2006	37	21-40	White	II	T1	N2	M0	Regional	Yes	No/Unknown	Alive	123	Alive	0.618093	0.434813	-0.174402	-0.128986
8428093	2006	31	21-40	White	I	T2	N0	M0	Localized	Yes	No/Unknown	Alive	123	Alive	-0.608511	-0.687716	-0.082906	-0.175537
8428095	2006	38	21-40	Others	I	T1	N0	M0	Localized	Yes	Yes	Alive	122	Alive	-0.320207	0.140156	-0.285629	-0.367709
8428098	2006	36	21-40	White	I	T1	N0	M0	Localized	Yes	Yes	Alive	127	Alive	-0.608511	-0.405734	-0.285629	-0.367709
8428639	2006	47	41-60	White	III	T3	N0	M1	Distant	Yes	No/Unknown	Alive	123	Alive	2.52463	3.36787	2.15327	2.74965
8428764	2006	27	21-40	White	I	T2	N0	M0	Localized	Yes	Yes	Alive	129	Alive	-0.608511	-0.284814	-0.082906	-0.175537
8428797	2006	40	21-40	White	I	T1	N0	M0	Localized	Yes	Yes	Alive	123	Alive	-0.608511	-0.405734	-0.285629	-0.367709
8428829	2006	46	41-60	White	II	T2	N1	M0	Regional	Yes	No/Unknown	Alive	126	Alive	1.29803	1.01305	-0.027292	-0.056176
8428836	2006	21	21-40	White	III	T1	N0	M1	Distant	Yes	No/Unknown	Alive	120	Alive	1.8447	2.66871	1.74782	2.36531
8428914	2006	37	21-40	White	I	T2	N0	M0	Regional	Yes	Yes	Alive	127	Alive	0.282123	0.573417	-0.082906	-0.175537
8428933	2006	25	21-40	White	I	T1	N0	M0	Localized	Yes	No/Unknown	Alive	127	Alive	-0.608511	-0.808636	-0.285629	-0.367709
8428951	2006	48	41-60	Others	I	T1	N0	M0	Localized	Yes	No/Unknown	Alive	121	Alive	0.359727	0.194574	-0.285629	-0.367709
8429055	2006	27	21-40	Others	I	T2	N0	M0	Localized	Yes	No/Unknown	Alive	0	Alive	-0.320207	-0.141825	-0.082906	-0.175537
8429453	2006	49	41-60	White	I	T1	N0	M0	Localized	Yes	No/Unknown	Alive	130	Alive	0.071422	-0.351317	-0.285629	-0.367709
8431249	2006	25	21-40	White	I	T1	N0	M0	Localized	Yes	No/Unknown	Alive	128	Alive	-0.608511	-0.808636	-0.285629	-0.367709
8436420	2006	47	41-60	White	I	T1	N0	M0	Localized	Yes	Yes	Alive	125	Alive	0.071422	0.051585	-0.285629	-0.367709
8438108	2006	35	21-40	White	I	T1	N0	M0	Localized	Yes	Yes	Alive	129	Alive	-0.608511	-0.405734	-0.285629	-0.367709
8438117	2006	37	21-40	White	I	T2	N0	M0	Localized	Yes	Yes	Alive	130	Alive	-0.608511	-0.284814	-0.082906	-0.175537
8438124	2006	32	21-40	White	I	T2	N0	M0	Localized	Yes	Yes	Alive	130	Alive	-0.608511	-0.284814	-0.082906	-0.175537
8438125	2006	37	21-40	White	III	T1	N2	M0	Regional	Yes	No/Unknown	Alive	40	Alive	0.954063	0.82003	-0.174402	-0.128986
8444595	2006	34	21-40	White	I	T1	N0	M0	Localized	Yes	No/Unknown	Alive	128	Alive	-0.608511	-0.808636	-0.285629	-0.367709
8452560	2006	43	41-60	White	III	T1	N3	M0	Regional	Yes	No/Unknown	Alive	120	Alive	1.634	1.27735	-0.118788	-0.009625
8456405	2006	34	21-40	White	I	T2	N0	M0	Localized	Yes	No/Unknown	Alive	124	Alive	-0.608511	-0.687716	-0.082906	-0.175537
8459128	2007	35	21-40	White	II	T1	N1	M0	Regional	Yes	No/Unknown	Alive	119	Alive	0.618093	0.434813	-0.230016	-0.248348
8460047	2007	24	21-40	White	III	T2	N2	M0	Regional	Yes	No/Unknown	Alive	116	Alive	0.954063	0.94095	0.028322	0.063186
8460658	2007	22	21-40	White	I	T1	N0	M0	Localized	Yes	No/Unknown	Alive	109	Alive	-0.608511	-0.808636	-0.285629	-0.367709
8461096	2007	43	41-60	White	I	T1	N0	M0	Localized	Yes	Yes	Alive	110	Alive	0.071422	0.051585	-0.285629	-0.367709
8461439	2007	19	0-20	White	I	T1	N0	M0	Localized	Yes	No/Unknown	Alive	117	Alive	-1.28845	-1.26595	-0.285629	-0.367709
8462623	2007	24	21-40	White	I	T1	N0	M0	Localized	Yes	No/Unknown	Alive	118	Alive	-0.608511	-0.808636	-0.285629	-0.367709
8462665	2007	27	21-40	White	III	T3	N1	M0	Regional	Yes	No/Unknown	Alive	116	Alive	0.954063	1.06187	0.175431	0.135997
8462686	2007	34	21-40	White	I	T1	N0	M0	Localized	Yes	No/Unknown	Alive	116	Alive	-0.608511	-0.808636	-0.285629	-0.367709
8464772	2007	56	41-60	White	I	T1	N0	M0	Localized	Yes	No/Unknown	Alive	111	Alive	0.071422	-0.351317	-0.285629	-0.367709
8465300	2007	29	21-40	White	I	T1	N0	M0	Localized	Yes	No/Unknown	Alive	113	Alive	-0.608511	-0.808636	-0.285629	-0.367709
8465466	2007	30	21-40	White	I	T1	N0	M0	Localized	Yes	Yes	Alive	113	Alive	-0.608511	-0.405734	-0.285629	-0.367709
8465590	2007	36	21-40	White	I	T1	N0	M0	Localized	Yes	Yes	Alive	112	Alive	-0.608511	-0.405734	-0.285629	-0.367709
8468213	2007	40	21-40	White	I	T1	N0	M0	Localized	Yes	Yes	Alive	110	Alive	-0.608511	-0.405734	-0.285629	-0.367709
8468358	2007	33	21-40	White	I	T2	N0	M0	Localized	Yes	Yes	Alive	114	Alive	-0.608511	-0.284814	-0.082906	-0.175537
8469722	2007	38	21-40	White	I	T1	N0	M0	Localized	Yes	No/Unknown	Alive	119	Alive	-0.608511	-0.808636	-0.285629	-0.367709
8470057	2007	31	21-40	White	II	T1	N1	M0	Regional	Yes	Yes	Alive	115	Alive	0.618093	0.837715	-0.230016	-0.248348
8471649	2007	42	41-60	White	I	T2	N0	M0	Localized	Yes	Yes	Alive	114	Alive	0.071422	0.172504	-0.082906	-0.175537
8473785	2007	24	21-40	White	I	T1	N0	M0	Localized	Yes	No/Unknown	Alive	113	Alive	-0.608511	-0.808636	-0.285629	-0.367709
8473984	2007	20	0-20	White	II	T2	N1	M0	Regional	Yes	No/Unknown	Alive	117	Alive	-0.061841	0.098414	-0.027292	-0.056176
8474157	2007	39	21-40	White	I	T2	N0	M0	Localized	Yes	Yes	Alive	110	Alive	-0.608511	-0.284814	-0.082906	-0.175537
8474465	2007	22	21-40	White	III	T3	N3	M1	Distant	Yes	No/Unknown	Alive	117	Alive	1.8447	2.91055	2.32011	3.10773
8475002	2007	39	21-40	White	I	T1	N0	M0	Localized	Yes	No/Unknown	Alive	117	Alive	-0.608511	-0.808636	-0.285629	-0.367709
8479106	2007	15	0-20	White	I	T2	N0	M0	Localized	Yes	No/Unknown	Alive	118	Alive	-1.28845	-1.14504	-0.082906	-0.175537
8480798	2007	54	41-60	White	I	T1	N0	M0	Localized	Yes	No/Unknown	Alive	115	Alive	0.071422	-0.351317	-0.285629	-0.367709
8481708	2007	44	41-60	White	I	T2	N0	M0	Localized	Yes	No/Unknown	Alive	114	Alive	0.071422	-0.230397	-0.082906	-0.175537
8481785	2007	47	41-60	White	I	T2	N0	M0	Localized	Yes	Yes	Alive	109	Alive	0.071422	0.172504	-0.082906	-0.175537
8485427	2007	48	41-60	White	I	T1	N0	M0	Localized	Yes	Yes	Alive	118	Alive	0.071422	0.051585	-0.285629	-0.367709
8485567	2007	27	21-40	White	I	T1	N0	M0	Localized	Yes	No/Unknown	Alive	111	Alive	-0.608511	-0.808636	-0.285629	-0.367709
8485955	2007	45	41-60	White	I	T1	N0	M0	Localized	Yes	Yes	Alive	108	Alive	0.071422	0.051585	-0.285629	-0.367709
8486270	2007	46	41-60	White	III	T2	N1	M1	Distant	Yes	No/Unknown	Alive	118	Alive	2.52463	3.24695	2.00616	2.67684
8486853	2007	24	21-40	White	I	T2	N0	M0	Localized	Yes	Yes	Alive	114	Alive	-0.608511	-0.284814	-0.082906	-0.175537
8487585	2007	27	21-40	White	I	T1	N0	M0	Regional	Yes	Yes	Alive	118	Alive	0.282123	0.452498	-0.285629	-0.367709
8489309	2007	40	21-40	White	I	T1	N0	M0	Localized	Yes	Yes	Alive	118	Alive	-0.608511	-0.405734	-0.285629	-0.367709
8489520	2007	39	21-40	White	I	T2	N0	M0	Localized	Yes	Yes	Alive	116	Alive	-0.608511	-0.284814	-0.082906	-0.175537
8489572	2007	37	21-40	White	I	T1	N0	M0	Localized	Yes	No/Unknown	Alive	115	Alive	-0.608511	-0.808636	-0.285629	-0.367709
8489585	2007	36	21-40	White	II	T2	N2	M0	Regional	Yes	No/Unknown	Alive	119	Alive	0.618093	0.555733	0.028322	0.063186
8489690	2007	40	21-40	White	I	T1	N0	M0	Localized	Yes	No/Unknown	Alive	115	Alive	-0.608511	-0.808636	-0.285629	-0.367709
8489985	2007	23	21-40	White	I	T1	N0	M0	Localized	Yes	Yes	Alive	109	Alive	-0.608511	-0.405734	-0.285629	-0.367709
8490061	2007	27	21-40	White	I	T1	N0	M0	Localized	Yes	Yes	Alive	111	Alive	-0.608511	-0.405734	-0.285629	-0.367709
8490200	2007	57	41-60	White	I	T2	N0	M0	Localized	Yes	Yes	Alive	116	Alive	0.071422	0.172504	-0.082906	-0.175537
8490265	2007	32	21-40	White	I	T1	N0	M0	Localized	Yes	No/Unknown	Alive	108	Alive	-0.608511	-0.808636	-0.285629	-0.367709
8491059	2007	36	21-40	White	I	T2	N0	M0	Localized	Yes	Yes	Alive	116	Alive	-0.608511	-0.284814	-0.082906	-0.175537
8491161	2007	37	21-40	White	I	T2	N0	M0	Localized	Yes	Yes	Alive	111	Alive	-0.608511	-0.284814	-0.082906	-0.175537
8491288	2007	40	21-40	White	I	T2	N0	M0	Localized	Yes	Yes	Alive	109	Alive	-0.608511	-0.284814	-0.082906	-0.175537
8491967	2007	28	21-40	White	I	T2	N0	M0	Localized	Yes	No/Unknown	Alive	115	Alive	-0.608511	-0.687716	-0.082906	-0.175537
8492027	2007	22	21-40	White	III	T1	N2	M1	Distant	Yes	Yes	Alive	113	Alive	1.8447	3.07161	1.85905	2.60403
8492289	2007	54	41-60	White	III	T1	N1	M0	Regional	Yes	No/Unknown	Alive	117	Alive	1.634	1.27735	-0.230016	-0.248348
8492993	2007	21	21-40	White	I	T1	N0	M0	Localized	Yes	Yes	Alive	112	Alive	-0.608511	-0.405734	-0.285629	-0.367709
8493501	2007	41	41-60	White	I	T1	N0	M0	Localized	Yes	Yes	Other Cause of Death	41	Dead	0.071422	0.051585	-0.285629	-0.367709
8494817	2008	26	21-40	White	I	T1	N0	M0	Localized	Yes	Yes	Alive	99	Alive	-0.608511	-0.405734	-0.285629	-0.367709
8494935	2008	32	21-40	White	I	T1	N0	M0	Localized	Yes	No/Unknown	Alive	103	Alive	-0.608511	-0.808636	-0.285629	-0.367709
8495362	2008	29	21-40	White	I	T2	N0	M0	Localized	Yes	No/Unknown	Alive	106	Alive	-0.608511	-0.687716	-0.082906	-0.175537
8496093	2007	17	0-20	White	I	T1	N0	M0	Localized	Yes	No/Unknown	Alive	113	Alive	-1.28845	-1.26595	-0.285629	-0.367709
8496463	2008	45	41-60	White	II	T1	N1	M0	Regional	Yes	Yes	Alive	101	Alive	1.29803	1.29503	-0.230016	-0.248348
8496538	2007	18	0-20	White	III	T3	N1	M1	Distant	Yes	No/Unknown	Alive	113	Alive	1.16476	2.45323	2.20888	2.86901
8496899	2007	48	41-60	White	III	T1	N2	M0	Regional	Yes	No/Unknown	Alive	111	Alive	1.634	1.27735	-0.174402	-0.128986
8497390	2008	16	0-20	White	I	T1	N0	M0	Localized	Yes	No/Unknown	Alive	100	Alive	-1.28845	-1.26595	-0.285629	-0.367709
8497469	2008	35	21-40	White	I	T2	N0	M0	Localized	Yes	No/Unknown	Alive	105	Alive	-0.608511	-0.687716	-0.082906	-0.175537
8498056	2008	45	41-60	White	I	T1	N0	M0	Localized	Yes	Yes	Alive	100	Alive	0.071422	0.051585	-0.285629	-0.367709
8498974	2007	34	21-40	White	I	T1	N0	M0	Localized	Yes	No/Unknown	Alive	113	Alive	-0.608511	-0.808636	-0.285629	-0.367709
8499094	2008	18	0-20	White	I	T1	N0	M0	Localized	Yes	Yes	Alive	106	Alive	-1.28845	-0.863053	-0.285629	-0.367709
8499323	2008	48	41-60	White	I	T2	N0	M0	Localized	Yes	Yes	Alive	102	Alive	0.071422	0.172504	-0.082906	-0.175537
8500115	2008	46	41-60	White	I	T2	N0	M0	Localized	Yes	Yes	Alive	100	Alive	0.071422	0.172504	-0.082906	-0.175537
8500250	2008	24	21-40	White	I	T1	N0	M0	Localized	Yes	Yes	Alive	106	Alive	-0.608511	-0.405734	-0.285629	-0.367709
8501010	2008	46	41-60	White	I	T1	N0	M0	Localized	Yes	No/Unknown	Alive	98	Alive	0.071422	-0.351317	-0.285629	-0.367709
8501758	2008	26	21-40	White	II	T1	N1	M0	Regional	Yes	No/Unknown	Alive	107	Alive	0.618093	0.434813	-0.230016	-0.248348
8502051	2008	39	21-40	White	I	T2	N0	M0	Localized	Yes	No/Unknown	Alive	105	Alive	-0.608511	-0.687716	-0.082906	-0.175537
8502528	2008	33	21-40	White	III	T1	N1	M0	Regional	Yes	Yes	Alive	85	Alive	0.954063	1.22293	-0.230016	-0.248348
8503061	2008	41	41-60	White	I	T1	N0	M0	Localized	Yes	No/Unknown	Alive	102	Alive	0.071422	-0.351317	-0.285629	-0.367709
8503067	2008	26	21-40	White	III	T3	N1	M1	Distant	Yes	No/Unknown	Alive	99	Alive	1.8447	2.91055	2.20888	2.86901
8503953	2008	47	41-60	White	III	T2	N1	M0	Regional	Yes	No/Unknown	Alive	103	Alive	1.634	1.39827	-0.027292	-0.056176
8504103	2008	48	41-60	White	I	T2	N0	M0	Localized	Yes	Yes	Alive	106	Alive	0.071422	0.172504	-0.082906	-0.175537
8504785	2008	35	21-40	White	I	T1	N0	M0	Localized	Yes	No/Unknown	Alive	104	Alive	-0.608511	-0.808636	-0.285629	-0.367709
8504827	2007	46	41-60	White	I	T1	N0	M0	Localized	Yes	No/Unknown	Alive	90	Alive	0.071422	-0.351317	-0.285629	-0.367709
8504852	2007	28	21-40	White	I	T2	N0	M0	Localized	Yes	Yes	Alive	118	Alive	-0.608511	-0.284814	-0.082906	-0.175537
8504973	2007	52	41-60	White	I	T1	N0	M0	Localized	Yes	No/Unknown	Alive	113	Alive	0.071422	-0.351317	-0.285629	-0.367709
8505239	2008	21	21-40	White	I	T1	N0	M0	Localized	Yes	No/Unknown	Alive	101	Alive	-0.608511	-0.808636	-0.285629	-0.367709
8505369	2008	32	21-40	White	I	T2	N0	M0	Localized	Yes	No/Unknown	Alive	75	Alive	-0.608511	-0.687716	-0.082906	-0.175537
8506008	2008	28	21-40	White	I	T2	N0	M0	Localized	Yes	No/Unknown	Alive	103	Alive	-0.608511	-0.687716	-0.082906	-0.175537
8506591	2008	50	41-60	White	I	T1	N0	M0	Localized	Yes	Yes	Alive	104	Alive	0.071422	0.051585	-0.285629	-0.367709
8508405	2008	30	21-40	White	I	T1	N0	M0	Localized	Yes	No/Unknown	Alive	100	Alive	-0.608511	-0.808636	-0.285629	-0.367709
8510070	2008	43	41-60	White	I	T2	N0	M0	Localized	Yes	No/Unknown	Alive	107	Alive	0.071422	-0.230397	-0.082906	-0.175537
8511797	2008	36	21-40	White	I	T1	N0	M0	Localized	Yes	No/Unknown	Alive	107	Alive	-0.608511	-0.808636	-0.285629	-0.367709
8512130	2008	53	41-60	White	I	T2	N0	M0	Localized	Yes	No/Unknown	Alive	83	Alive	0.071422	-0.230397	-0.082906	-0.175537
8512270	2008	46	41-60	White	I	T2	N0	M0	Localized	Yes	Yes	Alive	100	Alive	0.071422	0.172504	-0.082906	-0.175537
8515578	2008	41	41-60	White	I	T1	N0	M0	Localized	Yes	No/Unknown	Alive	105	Alive	0.071422	-0.351317	-0.285629	-0.367709
8515724	2008	35	21-40	White	I	T2	N0	M0	Localized	Yes	Yes	Alive	107	Alive	-0.608511	-0.284814	-0.082906	-0.175537
8515752	2008	47	41-60	White	I	T1	N0	M0	Localized	Yes	Yes	Alive	98	Alive	0.071422	0.051585	-0.285629	-0.367709
8516338	2008	55	41-60	White	I	T2	N0	M0	Localized	Yes	No/Unknown	Alive	107	Alive	0.071422	-0.230397	-0.082906	-0.175537
8516578	2008	29	21-40	White	I	T1	N0	M0	Localized	Yes	Yes	Alive	97	Alive	-0.608511	-0.405734	-0.285629	-0.367709
8516587	2008	33	21-40	White	I	T1	N0	M0	Localized	Yes	No/Unknown	Alive	106	Alive	-0.608511	-0.808636	-0.285629	-0.367709
8516903	2008	21	21-40	White	I	T1	N0	M0	Localized	Yes	No/Unknown	Alive	97	Alive	-0.608511	-0.808636	-0.285629	-0.367709
8517128	2007	30	21-40	White	I	T1	N0	M0	Localized	Yes	No/Unknown	Alive	109	Alive	-0.608511	-0.808636	-0.285629	-0.367709
8520298	2008	32	21-40	White	I	T1	N0	M0	Localized	Yes	Yes	Alive	100	Alive	-0.608511	-0.405734	-0.285629	-0.367709
8520550	2008	51	41-60	White	II	T2	N3	M0	Regional	Yes	No/Unknown	Alive	103	Alive	1.29803	1.01305	0.083935	0.182548
8520882	2008	43	41-60	White	I	T2	N0	M0	Localized	Yes	No/Unknown	Alive	96	Alive	0.071422	-0.230397	-0.082906	-0.175537
8521103	2008	37	21-40	White	I	T1	N0	M0	Localized	Yes	No/Unknown	Alive	2	Alive	-0.608511	-0.808636	-0.285629	-0.367709
8521527	2008	48	41-60	White	I	T1	N0	M0	Localized	Yes	Yes	Alive	105	Alive	0.071422	0.051585	-0.285629	-0.367709
8521934	2008	38	21-40	White	I	T2	N0	M0	Localized	Yes	Yes	Alive	99	Alive	-0.608511	-0.284814	-0.082906	-0.175537
8521940	2008	35	21-40	White	I	T3	N0	M0	Regional	Yes	No/Unknown	Alive	107	Alive	0.282123	0.291436	0.119817	0.016635
8522025	2008	45	41-60	White	I	T1	N0	M0	Localized	Yes	No/Unknown	Alive	103	Alive	0.071422	-0.351317	-0.285629	-0.367709
8522172	2008	25	21-40	White	I	T1	N0	M0	Localized	Yes	No/Unknown	Alive	107	Alive	-0.608511	-0.808636	-0.285629	-0.367709
8522995	2008	25	21-40	Others	I	T2	N0	M0	Localized	Yes	No/Unknown	Alive	104	Alive	-0.320207	-0.141825	-0.082906	-0.175537
8912477	2008	54	41-60	White	I	T3	N0	M0	Regional	Yes	Yes	Alive	100	Alive	0.962056	1.15166	0.119817	0.016635
8913398	2008	40	21-40	White	I	T2	N0	M0	Localized	Yes	No/Unknown	Alive	98	Alive	-0.608511	-0.687716	-0.082906	-0.175537
8913861	2008	29	21-40	White	I	T1	N0	M0	Localized	Yes	No/Unknown	Alive	101	Alive	-0.608511	-0.808636	-0.285629	-0.367709
8915115	2008	51	41-60	White	II	T1	N1	M0	Regional	Yes	Yes	Alive	105	Alive	1.29803	1.29503	-0.230016	-0.248348
8915818	2008	27	21-40	Others	III	T1	N0	M1	Distant	Yes	No/Unknown	Alive	105	Alive	2.133	3.2146	1.74782	2.36531
8917543	2008	20	0-20	White	III	T2	N1	M0	Regional	Yes	No/Unknown	Alive	104	Alive	0.274129	0.483631	-0.027292	-0.056176
8917959	2008	38	21-40	White	I	T2	N0	M0	Localized	Yes	No/Unknown	Alive	0	Alive	-0.608511	-0.687716	-0.082906	-0.175537
8918603	2008	40	21-40	White	I	T1	N0	M0	Localized	Yes	Yes	Alive	92	Alive	-0.608511	-0.405734	-0.285629	-0.367709
8920638	2009	19	0-20	White	I	T2	N0	M0	Localized	Yes	No/Unknown	Alive	87	Alive	-1.28845	-1.14504	-0.082906	-0.175537
8920648	2009	35	21-40	White	I	T1	N0	M0	Localized	Yes	Yes	Alive	94	Alive	-0.608511	-0.405734	-0.285629	-0.367709
8920973	2009	44	41-60	White	I	T1	N0	M0	Regional	Yes	No/Unknown	Alive	94	Alive	0.962056	0.506915	-0.285629	-0.367709
8921008	2009	51	41-60	White	I	T3	N0	M0	Regional	Yes	No/Unknown	Alive	92	Alive	0.962056	0.748754	0.119817	0.016635
8924378	2009	25	21-40	White	I	T1	N0	M0	Localized	Yes	No/Unknown	Alive	88	Alive	-0.608511	-0.808636	-0.285629	-0.367709
8924418	2009	41	41-60	White	I	T1	N0	M0	Localized	Yes	No/Unknown	Suicide and Self-Inflicted Injury	31	Dead	0.071422	-0.351317	-0.285629	-0.367709
8925122	2009	46	41-60	White	I	T2	N0	M0	Localized	Yes	Yes	Alive	85	Alive	0.071422	0.172504	-0.082906	-0.175537
8925281	2009	46	41-60	White	III	T3	N3	M0	Regional	Yes	No/Unknown	Alive	80	Alive	1.634	1.51919	0.286659	0.37472
8925625	2009	19	0-20	White	I	T1	N0	M0	Localized	Yes	No/Unknown	Alive	89	Alive	-1.28845	-1.26595	-0.285629	-0.367709
8925644	2009	15	0-20	White	I	T2	N0	M0	Localized	Yes	No/Unknown	Alive	85	Alive	-1.28845	-1.14504	-0.082906	-0.175537
8926748	2009	26	21-40	White	I	T2	N0	M0	Localized	Yes	No/Unknown	Alive	93	Alive	-0.608511	-0.687716	-0.082906	-0.175537
8926780	2009	29	21-40	White	I	T1	N0	M0	Localized	Yes	Yes	Alive	91	Alive	-0.608511	-0.405734	-0.285629	-0.367709
8926790	2009	20	0-20	White	I	T2	N0	M0	Localized	Yes	No/Unknown	Alive	91	Alive	-1.28845	-1.14504	-0.082906	-0.175537
8927869	2008	20	0-20	White	I	T2	N0	M0	Localized	Yes	No/Unknown	Alive	105	Alive	-1.28845	-1.14504	-0.082906	-0.175537
8928827	2009	43	41-60	White	I	T1	N0	M0	Localized	Yes	No/Unknown	Alive	77	Alive	0.071422	-0.351317	-0.285629	-0.367709
8928984	2009	31	21-40	White	II	T3	N2	M0	Regional	Yes	No/Unknown	Alive	3	Alive	0.618093	0.676653	0.231045	0.255358
8929156	2009	57	41-60	White	I	T2	N0	M0	Localized	Yes	Yes	Alive	93	Alive	0.071422	0.172504	-0.082906	-0.175537
8929525	2009	38	21-40	White	I	T1	N0	M0	Localized	Yes	No/Unknown	Alive	93	Alive	-0.608511	-0.808636	-0.285629	-0.367709
8929926	2009	29	21-40	White	III	T1	N1	M1	Distant	Yes	No/Unknown	Alive	95	Alive	1.8447	2.66871	1.80343	2.48467
8930362	2009	71	>60	White	I	T1	N0	M0	Localized	Yes	Yes	Alive	90	Alive	0.751355	0.508903	-0.285629	-0.367709
8931881	2009	60	41-60	White	I	T4	N0	M0	Distant	Yes	No/Unknown	Alive	85	Alive	1.85269	1.72791	0.322541	0.208807
8932166	2009	34	21-40	White	I	T2	N0	M0	Localized	Yes	No/Unknown	Alive	91	Alive	-0.608511	-0.687716	-0.082906	-0.175537
8932297	2009	44	41-60	Others	II	T1	N1	M0	Regional	Yes	Yes	Alive	95	Alive	1.58633	1.84092	-0.230016	-0.248348
8932467	2009	65	>60	White	I	T1	N0	M0	Localized	Yes	No/Unknown	Alive	88	Alive	0.751355	0.106002	-0.285629	-0.367709
8932807	2009	31	21-40	White	I	T1	N0	M0	Localized	Yes	No/Unknown	Alive	94	Alive	-0.608511	-0.808636	-0.285629	-0.367709
8932854	2009	44	41-60	White	I	T3	N0	M0	Regional	Yes	No/Unknown	Alive	86	Alive	0.962056	0.748754	0.119817	0.016635
8934721	2009	24	21-40	White	I	T2	N0	M0	Localized	Yes	No/Unknown	Alive	95	Alive	-0.608511	-0.687716	-0.082906	-0.175537
8935740	2009	50	41-60	White	I	T1	N0	M0	Localized	Yes	No/Unknown	Alive	85	Alive	0.071422	-0.351317	-0.285629	-0.367709
8936444	2009	43	41-60	White	I	T1	N0	M0	Localized	Yes	Yes	Alive	87	Alive	0.071422	0.051585	-0.285629	-0.367709
8938058	2007	33	21-40	White	I	T2	N0	M0	Localized	Yes	No/Unknown	Alive	108	Alive	-0.608511	-0.687716	-0.082906	-0.175537
8939016	2009	52	41-60	Black	III	T4	N0	M1	Distant	Yes	No/Unknown	Cerebrovascular Diseases	6	Dead	2.66878	3.76173	2.35599	2.94182
8939042	2009	27	21-40	White	I	T1	N0	M0	Localized	Yes	No/Unknown	Alive	88	Alive	-0.608511	-0.808636	-0.285629	-0.367709
8939468	2009	25	21-40	Others	I	T1	N0	M0	Localized	Yes	No/Unknown	Alive	84	Alive	-0.320207	-0.262745	-0.285629	-0.367709
8940304	2008	27	21-40	White	I	T1	N0	M0	Localized	Yes	No/Unknown	Alive	107	Alive	-0.608511	-0.808636	-0.285629	-0.367709
8941009	2008	24	21-40	White	III	T1	N3	M1	Distant	Yes	No/Unknown	Alive	98	Alive	1.8447	2.66871	1.91466	2.72339
8941113	2009	17	0-20	White	I	T2	N0	M0	Localized	Yes	No/Unknown	Alive	84	Alive	-1.28845	-1.14504	-0.082906	-0.175537
8941282	2009	28	21-40	White	I	T1	N0	M0	Localized	Yes	No/Unknown	Alive	89	Alive	-0.608511	-0.808636	-0.285629	-0.367709
8943126	2008	22	21-40	White	I	T1	N0	M0	Localized	Yes	No/Unknown	Alive	100	Alive	-0.608511	-0.808636	-0.285629	-0.367709
8945614	2009	30	21-40	White	II	T1	N1	M0	Regional	Yes	No/Unknown	Alive	88	Alive	0.618093	0.434813	-0.230016	-0.248348
8946562	2009	24	21-40	White	I	T2	N0	M0	Localized	Yes	No/Unknown	Alive	91	Alive	-0.608511	-0.687716	-0.082906	-0.175537
8947861	2009	40	21-40	White	I	T1	N0	M0	Localized	Yes	Yes	Alive	87	Alive	-0.608511	-0.405734	-0.285629	-0.367709
8947978	2009	49	41-60	White	I	T2	N0	M0	Regional	Yes	Yes	Alive	77	Alive	0.962056	1.03074	-0.082906	-0.175537
8947985	2009	38	21-40	White	I	T2	N0	M0	Regional	Yes	Yes	Alive	85	Alive	0.282123	0.573417	-0.082906	-0.175537
8952017	2009	53	41-60	White	II	T1	N1	M0	Regional	Yes	No/Unknown	Alive	93	Alive	1.29803	0.892132	-0.230016	-0.248348
8952043	2009	32	21-40	White	I	T1	N0	M0	Regional	Yes	No/Unknown	Alive	89	Alive	0.282123	0.049596	-0.285629	-0.367709
8952048	2009	33	21-40	White	I	T1	N0	M0	Localized	Yes	No/Unknown	Alive	91	Alive	-0.608511	-0.808636	-0.285629	-0.367709
8952328	2009	56	41-60	White	II	T1	N1	M0	Regional	Yes	Yes	Alive	88	Alive	1.29803	1.29503	-0.230016	-0.248348
8952611	2009	25	21-40	White	I	T1	N0	M0	Localized	Yes	No/Unknown	Alive	93	Alive	-0.608511	-0.808636	-0.285629	-0.367709
8955629	2009	35	21-40	White	I	T1	N0	M0	Regional	Yes	Yes	Alive	95	Alive	0.282123	0.452498	-0.285629	-0.367709
8955722	2009	41	41-60	White	I	T1	N0	M0	Localized	Yes	Yes	Alive	94	Alive	0.071422	0.051585	-0.285629	-0.367709
8957166	2009	34	21-40	White	I	T2	N0	M0	Localized	Yes	No/Unknown	Alive	87	Alive	-0.608511	-0.687716	-0.082906	-0.175537
8958017	2008	40	21-40	White	I	T1	N0	M0	Localized	Yes	No/Unknown	Alive	101	Alive	-0.608511	-0.808636	-0.285629	-0.367709
8967763	2010	55	41-60	White	I	T1	N0	M0	Regional	Yes	No/Unknown	Alive	78	Alive	0.962056	0.506915	-0.285629	-0.367709
8971224	2010	31	21-40	White	I	T1	N0	M0	Localized	Yes	Yes	Alive	10	Alive	-0.608511	-0.405734	-0.285629	-0.367709
8971363	2010	18	0-20	White	I	T1	N0	M0	Localized	Yes	No/Unknown	Alive	75	Alive	-1.28845	-1.26595	-0.285629	-0.367709
8976571	2010	28	21-40	White	II	T1	N2	M0	Regional	Yes	No/Unknown	Alive	4	Alive	0.618093	0.434813	-0.174402	-0.128986
8976590	2010	57	41-60	White	I	T2	N0	M0	Localized	Yes	No/Unknown	Alive	75	Alive	0.071422	-0.230397	-0.082906	-0.175537
8977375	2010	25	21-40	White	I	T1	N0	M0	Localized	Yes	No/Unknown	Alive	74	Alive	-0.608511	-0.808636	-0.285629	-0.367709
8977377	2010	35	21-40	White	I	T1	N0	M0	Localized	Yes	No/Unknown	Alive	73	Alive	-0.608511	-0.808636	-0.285629	-0.367709
8978803	2010	35	21-40	White	I	T2	N0	M0	Localized	Yes	No/Unknown	Alive	81	Alive	-0.608511	-0.687716	-0.082906	-0.175537
8979770	2010	30	21-40	White	III	T2	N2	M1	Regional	Yes	No/Unknown	Alive	73	Alive	0.954063	1.9314	2.06177	2.7962
8979924	2010	24	21-40	White	I	T2	N0	M0	Localized	Yes	Yes	Alive	83	Alive	-0.608511	-0.284814	-0.082906	-0.175537
8979980	2009	31	21-40	White	III	T2	N0	M1	Distant	Yes	No/Unknown	Alive	92	Alive	1.8447	2.78963	1.95054	2.55748
8980847	2010	45	41-60	White	I	T1	N0	M0	Localized	Yes	No/Unknown	Alive	78	Alive	0.071422	-0.351317	-0.285629	-0.367709
8981453	2010	37	21-40	White	I	T2	N0	M0	Regional	Yes	No/Unknown	Alive	77	Alive	0.282123	0.170516	-0.082906	-0.175537
8983030	2009	36	21-40	White	I	T1	N0	M0	Localized	Yes	No/Unknown	Alive	88	Alive	-0.608511	-0.808636	-0.285629	-0.367709
8983349	2010	39	21-40	White	I	T1	N0	M0	Localized	Yes	Yes	Alive	75	Alive	-0.608511	-0.405734	-0.285629	-0.367709
8983484	2010	26	21-40	White	III	T2	N3	M1	Distant	Yes	Yes	Other Cause of Death	53	Dead	1.8447	3.19253	2.11738	2.91556
8983551	2010	31	21-40	White	II	T2	N1	M0	Regional	Yes	No/Unknown	Alive	81	Alive	0.618093	0.555733	-0.027292	-0.056176
8983552	2010	29	21-40	White	I	T1	N0	M0	Localized	Yes	No/Unknown	Alive	77	Alive	-0.608511	-0.808636	-0.285629	-0.367709
8984486	2010	28	21-40	White	I	T2	N0	M0	Regional	Yes	No/Unknown	Alive	75	Alive	0.282123	0.170516	-0.082906	-0.175537
8984862	2010	47	41-60	White	I	T1	N0	M0	Localized	Yes	Yes	Alive	37	Alive	0.071422	0.051585	-0.285629	-0.367709
8985118	2010	41	41-60	White	I	T1	N0	M0	Localized	Yes	No/Unknown	Alive	76	Alive	0.071422	-0.351317	-0.285629	-0.367709
8985500	2009	49	41-60	White	I	T2	N0	M0	Localized	Yes	No/Unknown	Alive	89	Alive	0.071422	-0.230397	-0.082906	-0.175537
8986949	2010	53	41-60	White	I	T2	N0	M0	Localized	Yes	No/Unknown	Alive	77	Alive	0.071422	-0.230397	-0.082906	-0.175537
8987089	2010	30	21-40	White	I	T1	N0	M0	Localized	Yes	Yes	Alive	73	Alive	-0.608511	-0.405734	-0.285629	-0.367709
8987171	2010	22	21-40	White	I	T3	N0	M0	Regional	Yes	No/Unknown	Alive	74	Alive	0.282123	0.291436	0.119817	0.016635
8987593	2010	49	41-60	White	I	T2	N0	M0	Localized	Yes	Yes	Alive	73	Alive	0.071422	0.172504	-0.082906	-0.175537
8987602	2010	29	21-40	Others	I	T1	N0	M0	Localized	Yes	No/Unknown	Alive	79	Alive	-0.320207	-0.262745	-0.285629	-0.367709
8987624	2010	18	0-20	White	I	T1	N0	M0	Localized	Yes	No/Unknown	Alive	82	Alive	-1.28845	-1.26595	-0.285629	-0.367709
8987800	2010	55	41-60	White	I	T1	N0	M0	Localized	Yes	No/Unknown	Alive	80	Alive	0.071422	-0.351317	-0.285629	-0.367709
8987960	2010	37	21-40	White	I	T1	N0	M0	Localized	Yes	No/Unknown	Alive	80	Alive	-0.608511	-0.808636	-0.285629	-0.367709
8988186	2010	17	0-20	White	I	T1	N0	M0	Localized	Yes	No/Unknown	Alive	73	Alive	-1.28845	-1.26595	-0.285629	-0.367709
8991114	2010	26	21-40	White	I	T1	N0	M0	Localized	Yes	Yes	Alive	2	Alive	-0.608511	-0.405734	-0.285629	-0.367709
8991281	2010	40	21-40	Others	I	T1	N0	M0	Localized	Yes	No/Unknown	Alive	76	Alive	-0.320207	-0.262745	-0.285629	-0.367709
8991938	2010	20	0-20	White	I	T1	N0	M0	Localized	Yes	No/Unknown	Alive	83	Alive	-1.28845	-1.26595	-0.285629	-0.367709
8992533	2010	49	41-60	White	II	T2	N1	M0	Regional	Yes	No/Unknown	Alive	78	Alive	1.29803	1.01305	-0.027292	-0.056176
8992662	2010	51	41-60	White	II	T2	N3	M0	Regional	Yes	No/Unknown	Alive	73	Alive	1.29803	1.01305	0.083935	0.182548
8992779	2010	37	21-40	Others	I	T1	N0	M0	Localized	Yes	No/Unknown	Alive	74	Alive	-0.320207	-0.262745	-0.285629	-0.367709
8992788	2010	30	21-40	White	III	T3	N2	M1	Regional	Yes	No/Unknown	Alive	76	Alive	0.954063	2.05232	2.26449	2.98837
8993484	2010	40	21-40	White	I	T2	N0	M0	Localized	Yes	No/Unknown	Alive	75	Alive	-0.608511	-0.687716	-0.082906	-0.175537
8993648	2010	42	41-60	White	I	T1	N0	M0	Localized	Yes	No/Unknown	Alive	81	Alive	0.071422	-0.351317	-0.285629	-0.367709
8993852	2010	23	21-40	White	I	T2	N0	M0	Localized	Yes	No/Unknown	Alive	82	Alive	-0.608511	-0.687716	-0.082906	-0.175537
8994156	2010	56	41-60	White	I	T1	N0	M0	Localized	Yes	Yes	Alive	80	Alive	0.071422	0.051585	-0.285629	-0.367709
8995709	2010	56	41-60	White	I	T1	N0	M0	Localized	Yes	No/Unknown	Alive	82	Alive	0.071422	-0.351317	-0.285629	-0.367709
8995874	2010	34	21-40	White	I	T3	N0	M0	Regional	Yes	Yes	Alive	78	Alive	0.282123	0.694337	0.119817	0.016635
8995892	2010	25	21-40	White	I	T1	N0	M0	Localized	Yes	No/Unknown	Alive	81	Alive	-0.608511	-0.808636	-0.285629	-0.367709
8996090	2011	46	41-60	White	II	T2	N3	M0	Regional	Yes	Yes	Alive	65	Alive	1.29803	1.41595	0.083935	0.182548
8997767	2011	25	21-40	White	I	T1	N0	M0	Localized	Yes	No/Unknown	Alive	5	Alive	-0.608511	-0.808636	-0.285629	-0.367709
8997772	2011	57	41-60	White	I	T1	N0	M0	Localized	Yes	Yes	Alive	69	Alive	0.071422	0.051585	-0.285629	-0.367709
8998402	2011	46	41-60	White	I	T3	N0	M0	Regional	Yes	No/Unknown	Alive	70	Alive	0.962056	0.748754	0.119817	0.016635
8998585	2011	37	21-40	Black	I	T1	N0	M0	Localized	Yes	No/Unknown	Alive	69	Alive	-0.464359	-0.53569	-0.285629	-0.367709
8998918	2011	46	41-60	White	I	T2	N0	M0	Regional	Yes	Yes	Alive	68	Alive	0.962056	1.03074	-0.082906	-0.175537
8999232	2011	41	41-60	White	I	T1	N0	M0	Localized	Yes	No/Unknown	Alive	66	Alive	0.071422	-0.351317	-0.285629	-0.367709
8999803	2011	33	21-40	White	I	T3	N0	M0	Regional	Yes	No/Unknown	Alive	69	Alive	0.282123	0.291436	0.119817	0.016635
9000026	2011	38	21-40	White	II	T1	N1	M0	Regional	Yes	Yes	Alive	67	Alive	0.618093	0.837715	-0.230016	-0.248348
9000219	2011	39	21-40	White	I	T2	N0	M0	Localized	Yes	No/Unknown	Alive	69	Alive	-0.608511	-0.687716	-0.082906	-0.175537
9000292	2011	34	21-40	White	III	T1	N0	M1	Distant	Yes	No/Unknown	Alive	68	Alive	1.8447	2.66871	1.74782	2.36531
9000925	2011	33	21-40	Black	III	T3	N1	M1	Distant	Yes	No/Unknown	Alive	64	Alive	1.98885	3.18349	2.20888	2.86901
9001589	2011	53	41-60	White	I	T2	N0	M0	Localized	Yes	No/Unknown	Alive	61	Alive	0.071422	-0.230397	-0.082906	-0.175537
9001607	2011	45	41-60	White	I	T2	N0	M0	Regional	Yes	No/Unknown	Alive	64	Alive	0.962056	0.627835	-0.082906	-0.175537
9001610	2011	28	21-40	White	III	T1	N3	M1	Distant	Yes	No/Unknown	Alive	65	Alive	1.8447	2.66871	1.91466	2.72339
9001709	2011	28	21-40	White	I	T2	N0	M0	Localized	Yes	Yes	Alive	64	Alive	-0.608511	-0.284814	-0.082906	-0.175537
9001741	2011	25	21-40	White	I	T1	N0	M0	Localized	Yes	No/Unknown	Alive	67	Alive	-0.608511	-0.808636	-0.285629	-0.367709
9005990	2011	31	21-40	White	II	T2	N1	M0	Regional	Yes	No/Unknown	Alive	67	Alive	0.618093	0.555733	-0.027292	-0.056176
9006331	2011	40	21-40	White	I	T1	N0	M0	Localized	Yes	No/Unknown	Alive	67	Alive	-0.608511	-0.808636	-0.285629	-0.367709
9007554	2011	47	41-60	White	I	T2	N0	M0	Localized	Yes	Yes	Alive	65	Alive	0.071422	0.172504	-0.082906	-0.175537
9007595	2011	21	21-40	White	III	T1	N2	M1	Distant	Yes	No/Unknown	Alive	69	Alive	1.8447	2.66871	1.85905	2.60403
9007611	2011	22	21-40	Black	I	T1	N0	M0	Localized	Yes	No/Unknown	Alive	71	Alive	-0.464359	-0.53569	-0.285629	-0.367709
9008126	2011	25	21-40	White	I	T1	N0	M0	Localized	Yes	No/Unknown	Alive	65	Alive	-0.608511	-0.808636	-0.285629	-0.367709
9008735	2011	24	21-40	White	I	T1	N0	M0	Localized	Yes	No/Unknown	Alive	62	Alive	-0.608511	-0.808636	-0.285629	-0.367709
9008926	2011	21	21-40	White	I	T2	N0	M0	Localized	Yes	No/Unknown	Alive	54	Alive	-0.608511	-0.687716	-0.082906	-0.175537
9008977	2011	48	41-60	White	III	T1	N3	M1	Distant	Yes	No/Unknown	Alive	65	Alive	2.52463	3.12603	1.91466	2.72339
9010132	2011	29	21-40	White	II	T2	N2	M0	Regional	Yes	No/Unknown	Alive	65	Alive	0.618093	0.555733	0.028322	0.063186
9010324	2011	43	41-60	White	III	T1	N3	M1	Distant	Yes	No/Unknown	Alive	62	Alive	2.52463	3.12603	1.91466	2.72339
9011823	2011	34	21-40	White	I	T1	N0	M0	Localized	Yes	No/Unknown	Alive	71	Alive	-0.608511	-0.808636	-0.285629	-0.367709
9013006	2011	35	21-40	Black	I	T1	N0	M0	Localized	Yes	No/Unknown	Alive	69	Alive	-0.464359	-0.53569	-0.285629	-0.367709
9013574	2011	36	21-40	White	I	T2	N0	M0	Localized	Yes	Yes	Alive	4	Alive	-0.608511	-0.284814	-0.082906	-0.175537
9013853	2011	32	21-40	White	III	T1	N3	M0	Regional	Yes	No/Unknown	Alive	55	Alive	0.954063	0.82003	-0.118788	-0.009625
9013949	2011	28	21-40	White	III	T1	N2	M1	Distant	Yes	No/Unknown	Alive	60	Alive	1.8447	2.66871	1.85905	2.60403
9015470	2011	30	21-40	White	I	T3	N0	M0	Regional	Yes	Yes	Alive	3	Alive	0.282123	0.694337	0.119817	0.016635
9016366	2008	27	21-40	White	I	T1	N0	M0	Localized	Yes	No/Unknown	Alive	106	Alive	-0.608511	-0.808636	-0.285629	-0.367709
9017308	2011	39	21-40	White	I	T2	N0	M0	Localized	Yes	No/Unknown	Alive	67	Alive	-0.608511	-0.687716	-0.082906	-0.175537
9017362	2008	45	41-60	White	I	T1	N0	M0	Localized	Yes	No/Unknown	State DC not available or state DC available but no COD	39	Dead	0.071422	-0.351317	-0.285629	-0.367709
9017740	2011	28	21-40	White	I	T1	N0	M0	Localized	Yes	No/Unknown	Alive	65	Alive	-0.608511	-0.808636	-0.285629	-0.367709
9017922	2011	31	21-40	White	I	T1	N0	M0	Localized	Yes	Yes	Alive	70	Alive	-0.608511	-0.405734	-0.285629	-0.367709
9018554	2011	34	21-40	White	I	T1	N0	M0	Localized	Yes	Yes	Alive	71	Alive	-0.608511	-0.405734	-0.285629	-0.367709
9019083	2011	35	21-40	White	I	T1	N0	M0	Localized	Yes	Yes	Alive	63	Alive	-0.608511	-0.405734	-0.285629	-0.367709
9019392	2011	36	21-40	White	I	T2	N0	M0	Localized	Yes	No/Unknown	Alive	60	Alive	-0.608511	-0.687716	-0.082906	-0.175537
9020470	2011	34	21-40	White	I	T2	N0	M0	Localized	Yes	Yes	Alive	3	Alive	-0.608511	-0.284814	-0.082906	-0.175537
9020669	2011	28	21-40	White	I	T1	N0	M0	Localized	Yes	No/Unknown	Alive	61	Alive	-0.608511	-0.808636	-0.285629	-0.367709
9021470	2011	36	21-40	White	III	T1	N3	M1	Distant	Yes	No/Unknown	Alive	61	Alive	1.8447	2.66871	1.91466	2.72339
9022844	2011	26	21-40	Black	III	T1	N1	M1	Distant	Yes	No/Unknown	Alive	61	Alive	1.98885	2.94165	1.80343	2.48467
9023079	2011	49	41-60	White	I	T1	N0	M0	Localized	Yes	No/Unknown	Alive	65	Alive	0.071422	-0.351317	-0.285629	-0.367709
9024071	2011	63	>60	Others	III	T2	N1	M1	Distant	Yes	No/Unknown	Septicemia	2	Dead	3.49287	4.25016	2.00616	2.67684
9024535	2011	49	41-60	White	II	T1	N2	M0	Regional	Yes	No/Unknown	Alive	63	Alive	1.29803	0.892132	-0.174402	-0.128986
9024632	2011	45	41-60	White	I	T1	N0	M0	Localized	Yes	No/Unknown	Alive	62	Alive	0.071422	-0.351317	-0.285629	-0.367709
9025271	2011	34	21-40	White	I	T2	N0	M0	Localized	Yes	No/Unknown	Alive	61	Alive	-0.608511	-0.687716	-0.082906	-0.175537
9026104	2011	17	0-20	White	I	T1	N0	M0	Localized	Yes	No/Unknown	Alive	62	Alive	-1.28845	-1.26595	-0.285629	-0.367709
9027251	2011	23	21-40	White	I	T1	N0	M0	Localized	Yes	No/Unknown	Alive	70	Alive	-0.608511	-0.808636	-0.285629	-0.367709
9027516	2011	52	41-60	White	I	T2	N0	M0	Localized	Yes	Yes	Alive	64	Alive	0.071422	0.172504	-0.082906	-0.175537
9027605	2011	30	21-40	White	I	T2	N0	M0	Localized	Yes	No/Unknown	Alive	67	Alive	-0.608511	-0.687716	-0.082906	-0.175537
9028002	2011	23	21-40	White	I	T1	N0	M0	Localized	Yes	No/Unknown	Alive	61	Alive	-0.608511	-0.808636	-0.285629	-0.367709
9028281	2011	45	41-60	White	I	T3	N0	M0	Regional	Yes	No/Unknown	Alive	65	Alive	0.962056	0.748754	0.119817	0.016635
9030668	2011	41	41-60	White	I	T1	N0	M0	Localized	Yes	No/Unknown	Alive	67	Alive	0.071422	-0.351317	-0.285629	-0.367709
9030701	2011	28	21-40	White	II	T2	N1	M0	Regional	Yes	Yes	Alive	66	Alive	0.618093	0.958635	-0.027292	-0.056176
9030795	2011	23	21-40	White	II	T1	N1	M0	Regional	Yes	No/Unknown	Alive	69	Alive	0.618093	0.434813	-0.230016	-0.248348
9031179	2011	32	21-40	White	I	T2	N0	M0	Localized	Yes	No/Unknown	Alive	65	Alive	-0.608511	-0.687716	-0.082906	-0.175537
9031764	2011	25	21-40	White	II	T2	N2	M0	Regional	Yes	No/Unknown	Alive	65	Alive	0.618093	0.555733	0.028322	0.063186
9031949	2012	41	41-60	White	I	T1	N0	M0	Localized	Yes	No/Unknown	Alive	57	Alive	0.071422	-0.351317	-0.285629	-0.367709
9033676	2011	43	41-60	White	I	T1	N0	M0	Localized	Yes	No/Unknown	Alive	61	Alive	0.071422	-0.351317	-0.285629	-0.367709
9033869	2011	30	21-40	White	I	T1	N0	M0	Localized	Yes	No/Unknown	Alive	64	Alive	-0.608511	-0.808636	-0.285629	-0.367709
9034323	2011	39	21-40	White	I	T3	N0	M0	Regional	Yes	No/Unknown	Alive	62	Alive	0.282123	0.291436	0.119817	0.016635
9034500	2011	47	41-60	White	I	T1	N0	M0	Localized	Yes	No/Unknown	Alive	62	Alive	0.071422	-0.351317	-0.285629	-0.367709
9035192	2012	26	21-40	White	I	T1	N0	M0	Localized	Yes	No/Unknown	Alive	57	Alive	-0.608511	-0.808636	-0.285629	-0.367709
9035296	2012	29	21-40	White	I	T2	N0	M0	Localized	Yes	No/Unknown	Alive	54	Alive	-0.608511	-0.687716	-0.082906	-0.175537
9039469	2012	37	21-40	White	III	T4	N0	M1	Distant	Yes	Yes	Alive	4	Alive	1.8447	3.43437	2.35599	2.94182
9039656	2012	23	21-40	White	II	T2	N2	M0	Regional	Yes	No/Unknown	Alive	52	Alive	0.618093	0.555733	0.028322	0.063186
9039779	2012	22	21-40	White	I	T1	N0	M0	Localized	Yes	No/Unknown	Alive	59	Alive	-0.608511	-0.808636	-0.285629	-0.367709
9039867	2012	51	41-60	White	I	T1	N0	M0	Localized	Yes	No/Unknown	Alive	53	Alive	0.071422	-0.351317	-0.285629	-0.367709
9039872	2012	23	21-40	White	I	T1	N0	M0	Localized	Yes	No/Unknown	Alive	53	Alive	-0.608511	-0.808636	-0.285629	-0.367709
9040000	2012	44	41-60	White	I	T1	N0	M0	Localized	Yes	No/Unknown	Alive	58	Alive	0.071422	-0.351317	-0.285629	-0.367709
9041974	2012	28	21-40	White	I	T2	N0	M0	Localized	Yes	No/Unknown	Alive	58	Alive	-0.608511	-0.687716	-0.082906	-0.175537
9041977	2012	31	21-40	White	III	T3	N0	M1	Distant	Yes	No/Unknown	Alive	53	Alive	1.8447	2.91055	2.15327	2.74965
9042728	2012	64	>60	White	I	T2	N0	M0	Localized	Yes	No/Unknown	Alive	48	Alive	0.751355	0.226922	-0.082906	-0.175537
9042817	2012	45	41-60	White	I	T1	N0	M0	Localized	Yes	Yes	Alive	50	Alive	0.071422	0.051585	-0.285629	-0.367709
9044089	2012	26	21-40	White	II	T1	N1	M0	Regional	Yes	No/Unknown	Alive	51	Alive	0.618093	0.434813	-0.230016	-0.248348
9044556	2012	39	21-40	White	I	T1	N0	M0	Localized	Yes	No/Unknown	Alive	53	Alive	-0.608511	-0.808636	-0.285629	-0.367709
9046366	2012	44	41-60	White	I	T2	N0	M0	Localized	Yes	Yes	Alive	55	Alive	0.071422	0.172504	-0.082906	-0.175537
9046629	2012	46	41-60	White	I	T1	N0	M0	Localized	Yes	No/Unknown	Alive	55	Alive	0.071422	-0.351317	-0.285629	-0.367709
9046815	2012	42	41-60	White	I	T2	N0	M0	Localized	Yes	No/Unknown	Alive	54	Alive	0.071422	-0.230397	-0.082906	-0.175537
9046830	2012	35	21-40	White	I	T2	N0	M0	Localized	Yes	No/Unknown	Alive	51	Alive	-0.608511	-0.687716	-0.082906	-0.175537
9047171	2012	22	21-40	White	I	T2	N0	M0	Localized	Yes	No/Unknown	Alive	11	Alive	-0.608511	-0.687716	-0.082906	-0.175537
9048039	2012	38	21-40	White	I	T1	N0	M0	Localized	Yes	No/Unknown	Alive	56	Alive	-0.608511	-0.808636	-0.285629	-0.367709
9048778	2012	33	21-40	White	I	T1	N0	M0	Localized	Yes	No/Unknown	Alive	59	Alive	-0.608511	-0.808636	-0.285629	-0.367709
9050454	2012	45	41-60	White	I	T1	N0	M0	Localized	Yes	No/Unknown	Alive	52	Alive	0.071422	-0.351317	-0.285629	-0.367709
9051051	2012	37	21-40	White	I	T1	N0	M0	Localized	Yes	No/Unknown	Alive	55	Alive	-0.608511	-0.808636	-0.285629	-0.367709
9051184	2012	50	41-60	White	I	T2	N0	M0	Localized	Yes	No/Unknown	Alive	54	Alive	0.071422	-0.230397	-0.082906	-0.175537
9052696	2012	30	21-40	White	I	T1	N0	M0	Localized	Yes	No/Unknown	Alive	56	Alive	-0.608511	-0.808636	-0.285629	-0.367709
9052843	2012	36	21-40	White	I	T1	N0	M0	Localized	Yes	Yes	Alive	48	Alive	-0.608511	-0.405734	-0.285629	-0.367709
9052959	2012	32	21-40	White	II	T1	N2	M0	Regional	Yes	Yes	Alive	56	Alive	0.618093	0.837715	-0.174402	-0.128986
9053247	2012	44	41-60	White	I	T2	N0	M0	Localized	Yes	No/Unknown	Alive	48	Alive	0.071422	-0.230397	-0.082906	-0.175537
9054255	2012	51	41-60	White	I	T1	N0	M0	Localized	Yes	No/Unknown	Alive	59	Alive	0.071422	-0.351317	-0.285629	-0.367709
9054972	2012	43	41-60	White	I	T1	N0	M0	Localized	Yes	No/Unknown	Alive	56	Alive	0.071422	-0.351317	-0.285629	-0.367709
9055112	2012	49	41-60	White	I	T1	N0	M0	Localized	Yes	No/Unknown	Alive	54	Alive	0.071422	-0.351317	-0.285629	-0.367709
9055576	2012	50	41-60	White	I	T1	N0	M0	Localized	Yes	No/Unknown	Alive	52	Alive	0.071422	-0.351317	-0.285629	-0.367709
9056023	2012	43	41-60	White	I	T1	N0	M0	Localized	Yes	No/Unknown	Alive	52	Alive	0.071422	-0.351317	-0.285629	-0.367709
9056296	2012	22	21-40	White	I	T1	N0	M0	Localized	Yes	No/Unknown	Alive	51	Alive	-0.608511	-0.808636	-0.285629	-0.367709
9056653	2012	41	41-60	White	I	T1	N0	M0	Localized	Yes	No/Unknown	Alive	50	Alive	0.071422	-0.351317	-0.285629	-0.367709
9056994	2012	49	41-60	White	II	T2	N2	M0	Regional	Yes	No/Unknown	Alive	48	Alive	1.29803	1.01305	0.028322	0.063186
9059677	2012	25	21-40	White	I	T1	N0	M0	Localized	Yes	No/Unknown	Alive	59	Alive	-0.608511	-0.808636	-0.285629	-0.367709
9059790	2012	26	21-40	White	I	T1	N0	M0	Localized	Yes	No/Unknown	Alive	58	Alive	-0.608511	-0.808636	-0.285629	-0.367709
9060334	2012	21	21-40	White	II	T2	N1	M0	Regional	Yes	No/Unknown	Alive	48	Alive	0.618093	0.555733	-0.027292	-0.056176
9060340	2012	27	21-40	White	I	T1	N0	M0	Localized	Yes	No/Unknown	Alive	4	Alive	-0.608511	-0.808636	-0.285629	-0.367709
9061061	2012	50	41-60	White	II	T2	N2	M0	Regional	Yes	No/Unknown	Alive	25	Alive	1.29803	1.01305	0.028322	0.063186
9061184	2012	51	41-60	White	I	T2	N0	M0	Localized	Yes	No/Unknown	Alive	51	Alive	0.071422	-0.230397	-0.082906	-0.175537
9061382	2012	39	21-40	White	I	T2	N0	M0	Localized	Yes	No/Unknown	Alive	59	Alive	-0.608511	-0.687716	-0.082906	-0.175537
9061697	2012	49	41-60	White	II	T2	N1	M0	Regional	Yes	Yes	Alive	55	Alive	1.29803	1.41595	-0.027292	-0.056176
9061797	2012	52	41-60	White	I	T1	N0	M0	Localized	Yes	No/Unknown	Alive	59	Alive	0.071422	-0.351317	-0.285629	-0.367709
9064034	2012	34	21-40	White	III	T2	N2	M0	Regional	Yes	No/Unknown	Alive	55	Alive	0.954063	0.94095	0.028322	0.063186
9065804	2012	26	21-40	White	I	T1	N0	M0	Localized	Yes	No/Unknown	Alive	53	Alive	-0.608511	-0.808636	-0.285629	-0.367709
9066035	2012	25	21-40	White	I	T2	N0	M0	Localized	Yes	No/Unknown	Alive	55	Alive	-0.608511	-0.687716	-0.082906	-0.175537
9066405	2012	50	41-60	White	I	T2	N0	M0	Localized	Yes	No/Unknown	Alive	51	Alive	0.071422	-0.230397	-0.082906	-0.175537
9067080	2012	56	41-60	White	I	T2	N0	M0	Localized	Yes	No/Unknown	Alive	52	Alive	0.071422	-0.230397	-0.082906	-0.175537
9068302	2012	24	21-40	White	I	T1	N0	M0	Localized	Yes	No/Unknown	Alive	48	Alive	-0.608511	-0.808636	-0.285629	-0.367709
9070176	2012	42	41-60	White	I	T1	N0	M0	Localized	Yes	No/Unknown	Alive	50	Alive	0.071422	-0.351317	-0.285629	-0.367709
9070262	2012	26	21-40	White	I	T1	N0	M0	Localized	Yes	No/Unknown	Alive	54	Alive	-0.608511	-0.808636	-0.285629	-0.367709
9070628	2012	51	41-60	White	I	T2	N0	M0	Localized	Yes	No/Unknown	Alive	48	Alive	0.071422	-0.230397	-0.082906	-0.175537
9070771	2012	38	21-40	White	I	T1	N0	M0	Localized	Yes	No/Unknown	Alive	58	Alive	-0.608511	-0.808636	-0.285629	-0.367709
9071319	2012	42	41-60	White	III	T4	N1	M1	Distant	Yes	No/Unknown	Alive	38	Alive	2.52463	3.48879	2.4116	3.06118
9071911	2012	40	21-40	White	I	T1	N0	M0	Localized	Yes	No/Unknown	Alive	49	Alive	-0.608511	-0.808636	-0.285629	-0.367709
9072863	2012	28	21-40	White	I	T1	N0	M0	Localized	Yes	No/Unknown	Alive	58	Alive	-0.608511	-0.808636	-0.285629	-0.367709
9073447	2013	42	41-60	White	I	T1	N0	M0	Localized	Yes	Yes	Alive	37	Alive	0.071422	0.051585	-0.285629	-0.367709
9073459	2013	56	41-60	White	II	T1	N1	M0	Regional	Yes	Yes	Alive	45	Alive	1.29803	1.29503	-0.230016	-0.248348
9455617	2013	49	41-60	White	I	T1	N0	M0	Localized	Yes	No/Unknown	Alive	47	Alive	0.071422	-0.351317	-0.285629	-0.367709
9456302	2013	26	21-40	White	I	T1	N0	M0	Localized	Yes	No/Unknown	Alive	43	Alive	-0.608511	-0.808636	-0.285629	-0.367709
9456328	2014	52	41-60	White	I	T1	N0	M0	Localized	Yes	No/Unknown	Alive	33	Alive	0.071422	-0.351317	-0.285629	-0.367709
9456874	2013	31	21-40	White	I	T1	N0	M0	Localized	Yes	No/Unknown	Alive	41	Alive	-0.608511	-0.808636	-0.285629	-0.367709
9456954	2013	64	>60	White	I	T1	N0	M0	Localized	Yes	No/Unknown	Alive	42	Alive	0.751355	0.106002	-0.285629	-0.367709
9456997	2013	33	21-40	White	I	T1	N0	M0	Localized	Yes	No/Unknown	Alive	40	Alive	-0.608511	-0.808636	-0.285629	-0.367709
9457205	2013	60	41-60	White	III	T3	N1	M1	Distant	Yes	No/Unknown	Diabetes Mellitus	0	Dead	2.52463	3.36787	2.20888	2.86901
9457239	2013	35	21-40	White	I	T1	N0	M0	Localized	Yes	Yes	Alive	41	Alive	-0.608511	-0.405734	-0.285629	-0.367709
9459358	2013	29	21-40	Others	I	T1	N0	M0	Localized	Yes	No/Unknown	Alive	46	Alive	-0.320207	-0.262745	-0.285629	-0.367709
9459436	2013	32	21-40	White	I	T1	N0	M0	Localized	Yes	No/Unknown	Alive	46	Alive	-0.608511	-0.808636	-0.285629	-0.367709
9460262	2013	29	21-40	White	I	T1	N0	M0	Localized	Yes	No/Unknown	Alive	47	Alive	-0.608511	-0.808636	-0.285629	-0.367709
9461997	2013	34	21-40	White	I	T1	N0	M0	Localized	Yes	No/Unknown	Alive	43	Alive	-0.608511	-0.808636	-0.285629	-0.367709
9462708	2013	25	21-40	White	I	T2	N0	M0	Localized	Yes	No/Unknown	Alive	38	Alive	-0.608511	-0.687716	-0.082906	-0.175537
9462922	2013	26	21-40	White	I	T1	N0	M0	Localized	Yes	No/Unknown	Alive	47	Alive	-0.608511	-0.808636	-0.285629	-0.367709
9463014	2013	21	21-40	White	III	T3	N3	M1	Distant	Yes	No/Unknown	Other Cause of Death	7	Dead	1.8447	2.91055	2.32011	3.10773
9463363	2013	33	21-40	White	I	T2	N0	M0	Localized	Yes	No/Unknown	Alive	41	Alive	-0.608511	-0.687716	-0.082906	-0.175537
9463678	2013	71	>60	White	I	T1	N0	M0	Localized	Yes	No/Unknown	Alive	40	Alive	0.751355	0.106002	-0.285629	-0.367709
9464201	2013	25	21-40	White	I	T2	N0	M0	Regional	Yes	No/Unknown	Alive	43	Alive	0.282123	0.170516	-0.082906	-0.175537
9464321	2013	54	41-60	White	I	T2	N0	M0	Localized	Yes	No/Unknown	Alive	41	Alive	0.071422	-0.230397	-0.082906	-0.175537
9464791	2013	40	21-40	White	I	T1	N0	M0	Localized	Yes	No/Unknown	Alive	38	Alive	-0.608511	-0.808636	-0.285629	-0.367709
9465112	2013	60	41-60	White	I	T1	N0	M0	Localized	Yes	No/Unknown	Alive	44	Alive	0.071422	-0.351317	-0.285629	-0.367709
9465866	2013	24	21-40	White	I	T1	N0	M0	Localized	Yes	No/Unknown	Alive	45	Alive	-0.608511	-0.808636	-0.285629	-0.367709
9466239	2013	25	21-40	White	II	T2	N1	M0	Regional	Yes	No/Unknown	Alive	36	Alive	0.618093	0.555733	-0.027292	-0.056176
9467909	2013	32	21-40	White	II	T2	N2	M0	Regional	Yes	No/Unknown	Alive	37	Alive	0.618093	0.555733	0.028322	0.063186
9468148	2013	29	21-40	White	I	T2	N0	M0	Localized	Yes	No/Unknown	Alive	42	Alive	-0.608511	-0.687716	-0.082906	-0.175537
9468319	2013	57	41-60	White	III	T2	N0	M1	Distant	Yes	No/Unknown	Alive	42	Alive	2.52463	3.24695	1.95054	2.55748
9468626	2013	39	21-40	White	I	T2	N0	M0	Localized	Yes	No/Unknown	Alive	43	Alive	-0.608511	-0.687716	-0.082906	-0.175537
9468793	2013	34	21-40	White	I	T1	N0	M0	Localized	Yes	No/Unknown	Alive	38	Alive	-0.608511	-0.808636	-0.285629	-0.367709
9468976	2013	20	0-20	White	I	T1	N0	M0	Localized	Yes	No/Unknown	Alive	38	Alive	-1.28845	-1.26595	-0.285629	-0.367709
9469403	2013	23	21-40	White	I	T1	N0	M0	Localized	Yes	No/Unknown	Alive	41	Alive	-0.608511	-0.808636	-0.285629	-0.367709
9470031	2013	42	41-60	Black	I	T1	N0	M0	Localized	Yes	No/Unknown	Alive	38	Alive	0.215574	-0.078372	-0.285629	-0.367709
9473045	2013	29	21-40	White	II	T1	N3	M0	Regional	Yes	No/Unknown	Alive	36	Alive	0.618093	0.434813	-0.118788	-0.009625
9474052	2013	45	41-60	Black	I	T1	N0	M0	Localized	Yes	No/Unknown	Alive	32	Alive	0.215574	-0.078372	-0.285629	-0.367709
9474227	2013	39	21-40	White	I	T2	N0	M0	Regional	Yes	Yes	Alive	42	Alive	0.282123	0.573417	-0.082906	-0.175537
9475173	2013	37	21-40	White	I	T1	N0	M0	Localized	Yes	No/Unknown	Alive	33	Alive	-0.608511	-0.808636	-0.285629	-0.367709
9475264	2013	47	41-60	White	I	T1	N0	M0	Localized	Yes	Yes	Alive	41	Alive	0.071422	0.051585	-0.285629	-0.367709
9476198	2013	31	21-40	Black	III	T3	N0	M1	Distant	Yes	No/Unknown	Alive	44	Alive	1.98885	3.18349	2.15327	2.74965
9477446	2012	69	>60	White	I	T1	N0	M0	Localized	Yes	No/Unknown	Alive	48	Alive	0.751355	0.106002	-0.285629	-0.367709
9478091	2013	37	21-40	White	I	T1	N0	M0	Localized	Yes	No/Unknown	Alive	40	Alive	-0.608511	-0.808636	-0.285629	-0.367709
9478101	2013	24	21-40	White	I	T1	N0	M0	Localized	Yes	No/Unknown	Alive	38	Alive	-0.608511	-0.808636	-0.285629	-0.367709
9479386	2013	49	41-60	White	II	T1	N3	M0	Regional	Yes	No/Unknown	Alive	34	Alive	1.29803	0.892132	-0.118788	-0.009625
9479690	2012	35	21-40	White	I	T1	N0	M0	Localized	Yes	No/Unknown	Alive	57	Alive	-0.608511	-0.808636	-0.285629	-0.367709
9479855	2013	63	>60	White	I	T2	N0	M0	Localized	Yes	No/Unknown	Alive	28	Alive	0.751355	0.226922	-0.082906	-0.175537
9479875	2013	48	41-60	White	I	T1	N0	M0	Localized	Yes	No/Unknown	Alive	45	Alive	0.071422	-0.351317	-0.285629	-0.367709
9480660	2013	28	21-40	White	I	T1	N0	M0	Localized	Yes	No/Unknown	Alive	38	Alive	-0.608511	-0.808636	-0.285629	-0.367709
9481098	2012	18	0-20	White	I	T1	N0	M0	Localized	Yes	No/Unknown	Alive	53	Alive	-1.28845	-1.26595	-0.285629	-0.367709
9484182	2013	32	21-40	White	I	T1	N0	M0	Localized	Yes	No/Unknown	Alive	47	Alive	-0.608511	-0.808636	-0.285629	-0.367709
9484558	2013	44	41-60	White	III	T2	N1	M1	Distant	Yes	No/Unknown	Alive	37	Alive	2.52463	3.24695	2.00616	2.67684
9484705	2013	42	41-60	White	I	T1	N0	M0	Localized	Yes	No/Unknown	Alive	34	Alive	0.071422	-0.351317	-0.285629	-0.367709
9484973	2013	63	>60	White	III	T1	N3	M1	Distant	Yes	No/Unknown	Testis	1	Dead	3.20456	3.58335	1.91466	2.72339
9486215	2013	39	21-40	White	I	T1	N0	M0	Localized	Yes	No/Unknown	Alive	44	Alive	-0.608511	-0.808636	-0.285629	-0.367709
9486542	2013	35	21-40	White	I	T1	N0	M0	Localized	Yes	No/Unknown	Alive	43	Alive	-0.608511	-0.808636	-0.285629	-0.367709
9488186	2013	30	21-40	White	I	T1	N0	M0	Localized	Yes	No/Unknown	Alive	40	Alive	-0.608511	-0.808636	-0.285629	-0.367709
9488664	2013	50	41-60	White	I	T2	N0	M0	Localized	Yes	No/Unknown	Alive	36	Alive	0.071422	-0.230397	-0.082906	-0.175537
9488730	2013	75	>60	White	I	T2	N0	M0	Localized	Yes	No/Unknown	Alive	41	Alive	0.751355	0.226922	-0.082906	-0.175537
9489927	2013	32	21-40	White	III	T2	N1	M0	Regional	Yes	No/Unknown	Testis	22	Dead	0.954063	0.94095	-0.027292	-0.056176
9490968	2013	27	21-40	White	I	T1	N0	M0	Localized	Yes	No/Unknown	Alive	36	Alive	-0.608511	-0.808636	-0.285629	-0.367709
9491878	2013	42	41-60	White	I	T1	N0	M0	Localized	Yes	No/Unknown	Alive	47	Alive	0.071422	-0.351317	-0.285629	-0.367709
9492709	2011	21	21-40	White	I	T1	N0	M0	Localized	Yes	No/Unknown	Alive	69	Alive	-0.608511	-0.808636	-0.285629	-0.367709
9493501	2014	18	0-20	White	I	T1	N0	M0	Localized	Yes	No/Unknown	Alive	34	Alive	-1.28845	-1.26595	-0.285629	-0.367709
9494174	2014	46	41-60	White	I	T1	N0	M0	Localized	Yes	No/Unknown	Alive	4	Alive	0.071422	-0.351317	-0.285629	-0.367709
9494434	2014	24	21-40	White	II	T1	N1	M0	Regional	Yes	No/Unknown	Alive	34	Alive	0.618093	0.434813	-0.230016	-0.248348
9494657	2014	41	41-60	Others	I	T2	N0	M0	Localized	Yes	No/Unknown	Alive	2	Alive	0.359727	0.315493	-0.082906	-0.175537
9496135	2014	53	41-60	White	II	T1	N1	M0	Regional	Yes	No/Unknown	Alive	31	Alive	1.29803	0.892132	-0.230016	-0.248348
9496268	2014	50	41-60	White	I	T1	N0	M0	Localized	Yes	No/Unknown	Alive	32	Alive	0.071422	-0.351317	-0.285629	-0.367709
9496272	2014	42	41-60	White	I	T1	N0	M0	Localized	Yes	No/Unknown	Alive	30	Alive	0.071422	-0.351317	-0.285629	-0.367709
9496503	2014	27	21-40	White	II	T1	N2	M0	Regional	Yes	No/Unknown	Alive	27	Alive	0.618093	0.434813	-0.174402	-0.128986
9498096	2014	31	21-40	White	I	T1	N0	M0	Localized	Yes	No/Unknown	Alive	34	Alive	-0.608511	-0.808636	-0.285629	-0.367709
9500503	2013	32	21-40	White	I	T1	N0	M0	Localized	Yes	No/Unknown	Alive	24	Alive	-0.608511	-0.808636	-0.285629	-0.367709
9501704	2014	41	41-60	White	I	T2	N0	M0	Localized	Yes	No/Unknown	Alive	31	Alive	0.071422	-0.230397	-0.082906	-0.175537
9501923	2014	58	41-60	White	II	T2	N1	M0	Regional	Yes	Yes	Alive	29	Alive	1.29803	1.41595	-0.027292	-0.056176
9502587	2013	39	21-40	White	I	T1	N0	M0	Localized	Yes	No/Unknown	Alive	41	Alive	-0.608511	-0.808636	-0.285629	-0.367709
9502817	2014	33	21-40	White	I	T2	N0	M0	Localized	Yes	Yes	Alive	18	Alive	-0.608511	-0.284814	-0.082906	-0.175537
9503091	2014	42	41-60	White	I	T2	N0	M0	Localized	Yes	No/Unknown	Alive	30	Alive	0.071422	-0.230397	-0.082906	-0.175537
9503245	2013	21	21-40	White	I	T1	N0	M0	Localized	Yes	No/Unknown	Alive	36	Alive	-0.608511	-0.808636	-0.285629	-0.367709
9503786	2014	27	21-40	White	I	T2	N0	M0	Localized	Yes	No/Unknown	Alive	26	Alive	-0.608511	-0.687716	-0.082906	-0.175537
9503826	2014	24	21-40	White	I	T1	N0	M0	Localized	Yes	No/Unknown	Alive	26	Alive	-0.608511	-0.808636	-0.285629	-0.367709
9503901	2014	61	>60	White	I	T1	N0	M0	Localized	Yes	No/Unknown	Alive	25	Alive	0.751355	0.106002	-0.285629	-0.367709
9504291	2014	23	21-40	White	II	T2	N2	M0	Regional	Yes	No/Unknown	Alive	32	Alive	0.618093	0.555733	0.028322	0.063186
9504928	2014	28	21-40	White	I	T1	N0	M0	Localized	Yes	No/Unknown	Alive	28	Alive	-0.608511	-0.808636	-0.285629	-0.367709
9506169	2014	24	21-40	White	I	T2	N0	M0	Localized	Yes	No/Unknown	Alive	27	Alive	-0.608511	-0.687716	-0.082906	-0.175537
9506443	2014	26	21-40	White	I	T2	N0	M0	Localized	Yes	No/Unknown	Alive	35	Alive	-0.608511	-0.687716	-0.082906	-0.175537
9506501	2014	28	21-40	White	I	T1	N0	M0	Localized	Yes	No/Unknown	Alive	31	Alive	-0.608511	-0.808636	-0.285629	-0.367709
9506561	2014	26	21-40	White	I	T2	N0	M0	Localized	Yes	No/Unknown	Alive	32	Alive	-0.608511	-0.687716	-0.082906	-0.175537
9506761	2014	35	21-40	White	I	T1	N0	M0	Localized	Yes	No/Unknown	Alive	29	Alive	-0.608511	-0.808636	-0.285629	-0.367709
9507060	2014	53	41-60	White	I	T1	N0	M0	Localized	Yes	No/Unknown	Alive	29	Alive	0.071422	-0.351317	-0.285629	-0.367709
9507351	2014	27	21-40	White	I	T1	N0	M0	Localized	Yes	No/Unknown	Alive	27	Alive	-0.608511	-0.808636	-0.285629	-0.367709
9507601	2014	46	41-60	White	I	T1	N0	M0	Localized	Yes	No/Unknown	Alive	0	Alive	0.071422	-0.351317	-0.285629	-0.367709
9508136	2014	30	21-40	White	III	T1	N3	M0	Regional	Yes	No/Unknown	Alive	35	Alive	0.954063	0.82003	-0.118788	-0.009625
9508446	2014	26	21-40	White	I	T1	N0	M0	Localized	Yes	No/Unknown	Alive	35	Alive	-0.608511	-0.808636	-0.285629	-0.367709
9509127	2014	33	21-40	Others	I	T1	N0	M0	Localized	Yes	No/Unknown	Alive	0	Alive	-0.320207	-0.262745	-0.285629	-0.367709
9509636	2014	73	>60	White	I	T2	N0	M0	Localized	Yes	No/Unknown	Alive	31	Alive	0.751355	0.226922	-0.082906	-0.175537
9509758	2014	53	41-60	White	I	T1	N0	M0	Localized	Yes	No/Unknown	Alive	33	Alive	0.071422	-0.351317	-0.285629	-0.367709
9510014	2014	66	>60	White	I	T1	N0	M0	Localized	Yes	No/Unknown	Alive	31	Alive	0.751355	0.106002	-0.285629	-0.367709
9510091	2014	38	21-40	White	I	T2	N0	M0	Localized	Yes	No/Unknown	Alive	24	Alive	-0.608511	-0.687716	-0.082906	-0.175537
9510432	2014	23	21-40	White	I	T2	N0	M0	Localized	Yes	No/Unknown	Alive	0	Alive	-0.608511	-0.687716	-0.082906	-0.175537
9510759	2014	48	41-60	White	I	T1	N0	M0	Localized	Yes	Yes	Alive	32	Alive	0.071422	0.051585	-0.285629	-0.367709
9511241	2013	53	41-60	White	I	T1	N0	M0	Localized	Yes	No/Unknown	Alive	35	Alive	0.071422	-0.351317	-0.285629	-0.367709
9511343	2014	56	41-60	White	I	T1	N0	M0	Localized	Yes	No/Unknown	Alive	35	Alive	0.071422	-0.351317	-0.285629	-0.367709
9512013	2014	40	21-40	White	I	T4	N0	M0	Regional	Yes	Yes	Alive	25	Alive	0.282123	0.815257	0.322541	0.208807
9512247	2014	53	41-60	White	I	T1	N0	M0	Localized	Yes	No/Unknown	Alive	25	Alive	0.071422	-0.351317	-0.285629	-0.367709
9512431	2014	26	21-40	White	I	T2	N0	M0	Localized	Yes	No/Unknown	Alive	26	Alive	-0.608511	-0.687716	-0.082906	-0.175537
9513533	2014	45	41-60	White	I	T1	N0	M0	Localized	Yes	No/Unknown	Alive	24	Alive	0.071422	-0.351317	-0.285629	-0.367709
9513574	2014	57	41-60	White	I	T1	N0	M0	Localized	Yes	No/Unknown	Alive	10	Alive	0.071422	-0.351317	-0.285629	-0.367709
9514500	2014	43	41-60	White	I	T1	N0	M0	Localized	Yes	No/Unknown	Alive	30	Alive	0.071422	-0.351317	-0.285629	-0.367709
9514529	2014	55	41-60	White	I	T2	N0	M0	Localized	Yes	No/Unknown	Alive	29	Alive	0.071422	-0.230397	-0.082906	-0.175537
9514753	2014	29	21-40	Black	II	T1	N1	M0	Regional	Yes	No/Unknown	Alive	28	Alive	0.762245	0.707759	-0.230016	-0.248348
9514765	2014	40	21-40	White	I	T1	N0	M0	Localized	Yes	No/Unknown	Alive	27	Alive	-0.608511	-0.808636	-0.285629	-0.367709
9516067	2014	22	21-40	Others	III	T2	N0	M1	Distant	Yes	No/Unknown	Alive	19	Alive	2.133	3.33552	1.95054	2.55748
9516201	2014	37	21-40	White	I	T1	N0	M0	Localized	Yes	No/Unknown	Alive	27	Alive	-0.608511	-0.808636	-0.285629	-0.367709
9516622	2014	24	21-40	White	I	T1	N0	M0	Localized	Yes	No/Unknown	Alive	26	Alive	-0.608511	-0.808636	-0.285629	-0.367709
9517199	2014	30	21-40	Others	III	T2	N3	M1	Distant	Yes	No/Unknown	Alive	19	Alive	2.133	3.33552	2.11738	2.91556
9518892	2013	54	41-60	Others	III	T4	N1	M1	Distant	No	No/Unknown	Alive	37	Alive	4.17752	4.03468	2.4116	3.06118
9519747	2014	46	41-60	White	I	T2	N0	M0	Localized	Yes	No/Unknown	Alive	35	Alive	0.071422	-0.230397	-0.082906	-0.175537
9520810	2014	40	21-40	White	I	T1	N0	M0	Localized	Yes	No/Unknown	Alive	26	Alive	-0.608511	-0.808636	-0.285629	-0.367709
9523325	2014	40	21-40	White	I	T2	N0	M0	Localized	Yes	No/Unknown	Alive	32	Alive	-0.608511	-0.687716	-0.082906	-0.175537
9523501	2014	36	21-40	White	II	T2	N1	M0	Regional	Yes	No/Unknown	Alive	33	Alive	0.618093	0.555733	-0.027292	-0.056176
9523502	2014	61	>60	White	II	T3	N2	M0	Regional	Yes	No/Unknown	Alive	29	Alive	1.97796	1.59129	0.231045	0.255358
9524047	2014	33	21-40	White	I	T1	N0	M0	Localized	Yes	No/Unknown	Alive	35	Alive	-0.608511	-0.808636	-0.285629	-0.367709
9524779	2014	29	21-40	White	II	T2	N1	M0	Regional	Yes	No/Unknown	Alive	30	Alive	0.618093	0.555733	-0.027292	-0.056176
9525215	2014	35	21-40	White	I	T1	N0	M0	Localized	Yes	No/Unknown	Alive	31	Alive	-0.608511	-0.808636	-0.285629	-0.367709
9525216	2014	24	21-40	White	II	T1	N2	M0	Regional	Yes	No/Unknown	Alive	32	Alive	0.618093	0.434813	-0.174402	-0.128986
9525328	2014	46	41-60	White	I	T1	N0	M0	Localized	Yes	No/Unknown	Alive	29	Alive	0.071422	-0.351317	-0.285629	-0.367709
9525446	2014	51	41-60	White	I	T1	N0	M0	Localized	Yes	Yes	Alive	26	Alive	0.071422	0.051585	-0.285629	-0.367709
9525493	2014	47	41-60	White	III	T3	N0	M1	Distant	Yes	No/Unknown	Testis	3	Dead	2.52463	3.36787	2.15327	2.74965
9525764	2014	23	21-40	White	I	T1	N0	M0	Localized	Yes	No/Unknown	Alive	4	Alive	-0.608511	-0.808636	-0.285629	-0.367709
9525901	2014	55	41-60	White	III	T1	N1	M1	Distant	Yes	No/Unknown	Alive	27	Alive	2.52463	3.12603	1.80343	2.48467
9526063	2014	43	41-60	White	I	T1	N0	M0	Localized	Yes	Yes	Alive	2	Alive	0.071422	0.051585	-0.285629	-0.367709
9529072	2014	29	21-40	White	I	T1	N0	M0	Localized	Yes	No/Unknown	Alive	26	Alive	-0.608511	-0.808636	-0.285629	-0.367709
9530013	2014	46	41-60	White	I	T3	N0	M0	Regional	Yes	No/Unknown	Alive	24	Alive	0.962056	0.748754	0.119817	0.016635
9531896	2014	45	41-60	White	I	T2	N0	M0	Localized	Yes	No/Unknown	Alive	29	Alive	0.071422	-0.230397	-0.082906	-0.175537
9531925	2014	26	21-40	White	I	T1	N0	M0	Localized	Yes	No/Unknown	Alive	27	Alive	-0.608511	-0.808636	-0.285629	-0.367709
9532945	2015	49	41-60	White	II	T3	N3	M0	Regional	Yes	No/Unknown	Alive	23	Alive	1.29803	1.13397	0.286659	0.37472
9533957	2015	27	21-40	White	III	T1	N0	M1	Distant	Yes	No/Unknown	Miscellaneous Malignant Cancer	1	Dead	1.8447	2.66871	1.74782	2.36531
9534013	2015	47	41-60	Others	I	T1	N0	M0	Localized	Yes	No/Unknown	Alive	21	Alive	0.359727	0.194574	-0.285629	-0.367709
9536019	2015	32	21-40	White	I	T1	N0	M0	Localized	Yes	No/Unknown	Alive	18	Alive	-0.608511	-0.808636	-0.285629	-0.367709
9536063	2015	45	41-60	White	II	T1	N1	M0	Regional	Yes	No/Unknown	Alive	20	Alive	1.29803	0.892132	-0.230016	-0.248348
9536700	2015	26	21-40	White	I	T1	N0	M0	Localized	Yes	No/Unknown	Alive	5	Alive	-0.608511	-0.808636	-0.285629	-0.367709
9538892	2015	23	21-40	White	III	T2	N1	M0	Regional	Yes	No/Unknown	Alive	23	Alive	0.954063	0.94095	-0.027292	-0.056176
9539075	2015	28	21-40	White	I	T2	N0	M0	Localized	Yes	No/Unknown	Alive	21	Alive	-0.608511	-0.687716	-0.082906	-0.175537
9539209	2015	26	21-40	White	I	T1	N0	M0	Localized	Yes	No/Unknown	Alive	4	Alive	-0.608511	-0.808636	-0.285629	-0.367709
9539681	2015	58	41-60	White	I	T3	N0	M0	Regional	Yes	No/Unknown	Alive	20	Alive	0.962056	0.748754	0.119817	0.016635
9540100	2015	34	21-40	White	I	T1	N0	M0	Localized	Yes	No/Unknown	Alive	16	Alive	-0.608511	-0.808636	-0.285629	-0.367709
9540966	2015	23	21-40	White	I	T1	N0	M0	Localized	Yes	No/Unknown	Alive	12	Alive	-0.608511	-0.808636	-0.285629	-0.367709
9541963	2015	50	41-60	White	I	T1	N0	M0	Localized	Yes	No/Unknown	Alive	21	Alive	0.071422	-0.351317	-0.285629	-0.367709
9542456	2015	45	41-60	White	I	T1	N0	M0	Localized	Yes	No/Unknown	Alive	19	Alive	0.071422	-0.351317	-0.285629	-0.367709
9543095	2015	29	21-40	White	I	T1	N0	M0	Localized	Yes	No/Unknown	Alive	18	Alive	-0.608511	-0.808636	-0.285629	-0.367709
9543844	2015	42	41-60	White	II	T1	N1	M0	Regional	Yes	Yes	Alive	22	Alive	1.29803	1.29503	-0.230016	-0.248348
9544395	2015	40	21-40	White	I	T2	N0	M0	Localized	Yes	No/Unknown	Alive	23	Alive	-0.608511	-0.687716	-0.082906	-0.175537
9544401	2015	16	0-20	White	II	T1	N2	M0	Regional	Yes	No/Unknown	Alive	12	Alive	-0.061841	-0.022506	-0.174402	-0.128986
9544663	2015	44	41-60	White	I	T1	N0	M0	Localized	Yes	No/Unknown	Alive	14	Alive	0.071422	-0.351317	-0.285629	-0.367709
9544808	2015	22	21-40	White	I	T1	N0	M0	Localized	Yes	No/Unknown	Alive	16	Alive	-0.608511	-0.808636	-0.285629	-0.367709
9545553	2015	45	41-60	White	I	T2	N0	M0	Localized	Yes	No/Unknown	Alive	17	Alive	0.071422	-0.230397	-0.082906	-0.175537
9545733	2015	38	21-40	White	I	T2	N0	M0	Localized	Yes	No/Unknown	Alive	3	Alive	-0.608511	-0.687716	-0.082906	-0.175537
9545826	2015	33	21-40	White	I	T1	N0	M0	Localized	Yes	No/Unknown	Alive	2	Alive	-0.608511	-0.808636	-0.285629	-0.367709
9550040	2015	35	21-40	White	I	T1	N0	M0	Localized	Yes	No/Unknown	Alive	16	Alive	-0.608511	-0.808636	-0.285629	-0.367709
9550716	2015	69	>60	White	I	T1	N0	M0	Localized	Yes	No/Unknown	Alive	4	Alive	0.751355	0.106002	-0.285629	-0.367709
9551489	2015	28	21-40	White	I	T1	N0	M0	Localized	Yes	No/Unknown	Alive	17	Alive	-0.608511	-0.808636	-0.285629	-0.367709
9551772	2015	49	41-60	White	I	T2	N0	M0	Localized	Yes	No/Unknown	Alive	13	Alive	0.071422	-0.230397	-0.082906	-0.175537
9552577	2015	41	41-60	White	II	T1	N3	M0	Regional	Yes	Yes	Alive	23	Alive	1.29803	1.29503	-0.118788	-0.009625
9553552	2015	33	21-40	White	I	T2	N0	M0	Localized	Yes	No/Unknown	Alive	18	Alive	-0.608511	-0.687716	-0.082906	-0.175537
9554584	2015	55	41-60	White	I	T1	N0	M0	Localized	Yes	No/Unknown	Alive	14	Alive	0.071422	-0.351317	-0.285629	-0.367709
9554597	2015	26	21-40	White	III	T2	N2	M0	Regional	Yes	No/Unknown	Alive	16	Alive	0.954063	0.94095	0.028322	0.063186
9555629	2015	17	0-20	White	I	T1	N0	M0	Localized	Yes	No/Unknown	Alive	0	Alive	-1.28845	-1.26595	-0.285629	-0.367709
9555848	2015	35	21-40	White	I	T2	N0	M0	Localized	Yes	No/Unknown	Alive	16	Alive	-0.608511	-0.687716	-0.082906	-0.175537
9555921	2015	16	0-20	White	II	T1	N3	M0	Regional	Yes	No/Unknown	Alive	20	Alive	-0.061841	-0.022506	-0.118788	-0.009625
9556796	2015	42	41-60	White	I	T2	N0	M0	Localized	Yes	Yes	Alive	16	Alive	0.071422	0.172504	-0.082906	-0.175537
9556863	2015	26	21-40	White	II	T2	N2	M0	Regional	Yes	No/Unknown	Alive	5	Alive	0.618093	0.555733	0.028322	0.063186
9557164	2015	20	0-20	White	II	T1	N1	M0	Regional	Yes	No/Unknown	Alive	20	Alive	-0.061841	-0.022506	-0.230016	-0.248348
9557205	2015	22	21-40	White	I	T2	N0	M0	Localized	Yes	No/Unknown	Alive	17	Alive	-0.608511	-0.687716	-0.082906	-0.175537
9560801	2015	39	21-40	White	I	T1	N0	M0	Localized	Yes	Yes	Alive	12	Alive	-0.608511	-0.405734	-0.285629	-0.367709
9561099	2015	39	21-40	White	I	T1	N0	M0	Localized	Yes	No/Unknown	Alive	16	Alive	-0.608511	-0.808636	-0.285629	-0.367709
9562118	2015	23	21-40	White	III	T3	N0	M1	Distant	Yes	No/Unknown	Alive	18	Alive	1.8447	2.91055	2.15327	2.74965
9566254	2015	36	21-40	White	I	T2	N0	M0	Localized	Yes	No/Unknown	Alive	15	Alive	-0.608511	-0.687716	-0.082906	-0.175537
9568564	2015	44	41-60	White	I	T2	N0	M0	Localized	Yes	No/Unknown	Alive	17	Alive	0.071422	-0.230397	-0.082906	-0.175537
9570420	2015	49	41-60	White	II	T2	N2	M0	Regional	Yes	No/Unknown	Alive	20	Alive	1.29803	1.01305	0.028322	0.063186
13440996	2004	24	21-40	White	I	T1	N0	M0	Localized	Yes	No/Unknown	Alive	153	Alive	-0.608511	-0.808636	-0.285629	-0.367709
13441779	2004	34	21-40	White	I	T2	N0	M0	Localized	Yes	No/Unknown	Alive	155	Alive	-0.608511	-0.687716	-0.082906	-0.175537
13444525	2004	39	21-40	White	III	T3	N1	M0	Regional	Yes	Yes	Alive	154	Alive	0.954063	1.46477	0.175431	0.135997
13450030	2004	36	21-40	White	I	T1	N0	M0	Localized	Yes	No/Unknown	Alive	154	Alive	-0.608511	-0.808636	-0.285629	-0.367709
13451508	2004	57	41-60	White	I	T2	N0	M0	Localized	Yes	Yes	Alive	154	Alive	0.071422	0.172504	-0.082906	-0.175537
13451984	2004	33	21-40	White	I	T1	N0	M0	Localized	Yes	No/Unknown	Alive	150	Alive	-0.608511	-0.808636	-0.285629	-0.367709
13454744	2004	35	21-40	White	I	T1	N0	M0	Localized	Yes	Yes	Alive	147	Alive	-0.608511	-0.405734	-0.285629	-0.367709
13455326	2004	28	21-40	White	III	T1	N1	M1	Distant	Yes	No/Unknown	Alive	154	Alive	1.8447	2.66871	1.80343	2.48467
13456606	2004	29	21-40	White	I	T1	N0	M0	Localized	Yes	Yes	Alive	146	Alive	-0.608511	-0.405734	-0.285629	-0.367709
13458763	2004	17	0-20	White	I	T3	N0	M0	Regional	Yes	No/Unknown	Alive	155	Alive	-0.397811	-0.165883	0.119817	0.016635
13459506	2004	31	21-40	White	I	T2	N0	M0	Localized	Yes	No/Unknown	Alive	132	Alive	-0.608511	-0.687716	-0.082906	-0.175537
13460829	2004	29	21-40	White	I	T1	N0	M0	Localized	Yes	No/Unknown	Alive	153	Alive	-0.608511	-0.808636	-0.285629	-0.367709
13461554	2004	45	41-60	White	I	T1	N0	M0	Localized	Yes	No/Unknown	Alive	151	Alive	0.071422	-0.351317	-0.285629	-0.367709
13461980	2004	19	0-20	White	II	T1	N1	M0	Regional	Yes	No/Unknown	Alive	155	Alive	-0.061841	-0.022506	-0.230016	-0.248348
13462107	2004	31	21-40	White	I	T1	N0	M0	Localized	Yes	No/Unknown	Alive	150	Alive	-0.608511	-0.808636	-0.285629	-0.367709
13466543	2004	28	21-40	White	II	T2	N1	M0	Regional	Yes	No/Unknown	Alive	54	Alive	0.618093	0.555733	-0.027292	-0.056176
13468435	2004	35	21-40	White	I	T1	N0	M0	Localized	Yes	Yes	Alive	149	Alive	-0.608511	-0.405734	-0.285629	-0.367709
13468839	2004	18	0-20	White	I	T1	N0	M0	Localized	Yes	Yes	Alive	146	Alive	-1.28845	-0.863053	-0.285629	-0.367709
13468841	2004	35	21-40	White	I	T2	N0	M0	Localized	Yes	Yes	Alive	147	Alive	-0.608511	-0.284814	-0.082906	-0.175537
13468940	2005	35	21-40	White	I	T1	N0	M0	Localized	Yes	Yes	Alive	143	Alive	-0.608511	-0.405734	-0.285629	-0.367709
13469500	2004	29	21-40	White	I	T2	N0	M0	Regional	Yes	Yes	Alive	147	Alive	0.282123	0.573417	-0.082906	-0.175537
13469502	2004	56	41-60	White	I	T1	N0	M0	Localized	Yes	No/Unknown	Alive	148	Alive	0.071422	-0.351317	-0.285629	-0.367709
13469652	2004	30	21-40	Black	I	T2	N0	M0	Localized	Yes	Yes	Alive	147	Alive	-0.464359	-0.011869	-0.082906	-0.175537
13469944	2004	40	21-40	White	I	T1	N0	M0	Regional	Yes	No/Unknown	Alive	149	Alive	0.282123	0.049596	-0.285629	-0.367709
13472930	2004	37	21-40	White	I	T1	N0	M0	Regional	Yes	No/Unknown	Other Cause of Death	6	Dead	0.282123	0.049596	-0.285629	-0.367709
13472992	2004	23	21-40	White	I	T1	N0	M0	Localized	Yes	No/Unknown	Testis	1	Dead	-0.608511	-0.808636	-0.285629	-0.367709
13474303	2005	50	41-60	White	I	T1	N0	M0	Localized	Yes	Yes	Alive	142	Alive	0.071422	0.051585	-0.285629	-0.367709
13474465	2005	47	41-60	White	I	T1	N0	M0	Localized	Yes	Yes	Rectum and Rectosigmoid Junction	130	Dead	0.071422	0.051585	-0.285629	-0.367709
13477632	2004	51	41-60	White	I	T1	N0	M0	Regional	Yes	No/Unknown	Alive	50	Alive	0.962056	0.506915	-0.285629	-0.367709
13477723	2004	20	0-20	White	II	T1	N3	M0	Regional	Yes	No/Unknown	Alive	106	Alive	-0.061841	-0.022506	-0.118788	-0.009625
13478213	2004	28	21-40	White	I	T2	N0	M0	Localized	Yes	No/Unknown	Alive	147	Alive	-0.608511	-0.687716	-0.082906	-0.175537
13480653	2004	35	21-40	White	I	T2	N0	M0	Localized	Yes	No/Unknown	Alive	146	Alive	-0.608511	-0.687716	-0.082906	-0.175537
13482073	2004	32	21-40	White	I	T1	N0	M0	Localized	Yes	No/Unknown	Alive	144	Alive	-0.608511	-0.808636	-0.285629	-0.367709
13482717	2004	7	0-20	White	I	T1	N0	M0	Localized	Yes	Yes	Soft Tissue including Heart	29	Dead	-1.28845	-0.863053	-0.285629	-0.367709
13482991	2004	36	21-40	White	I	T1	N0	M0	Localized	Yes	Yes	Alive	152	Alive	-0.608511	-0.405734	-0.285629	-0.367709
13483171	2004	22	21-40	White	I	T1	N0	M0	Localized	Yes	No/Unknown	Alive	153	Alive	-0.608511	-0.808636	-0.285629	-0.367709
13483630	2005	39	21-40	White	I	T1	N0	M0	Localized	Yes	No/Unknown	Alive	135	Alive	-0.608511	-0.808636	-0.285629	-0.367709
13484553	2004	29	21-40	White	III	T3	N3	M0	Regional	Yes	No/Unknown	Alive	144	Alive	0.954063	1.06187	0.286659	0.37472
13484828	2004	75	>60	White	III	T1	N0	M1	Distant	Yes	No/Unknown	Testis	26	Dead	3.20456	3.58335	1.74782	2.36531
13485819	2005	39	21-40	White	I	T2	N0	M0	Localized	Yes	No/Unknown	Alive	139	Alive	-0.608511	-0.687716	-0.082906	-0.175537
13487137	2004	52	41-60	White	I	T3	N0	M0	Regional	Yes	Yes	Alive	148	Alive	0.962056	1.15166	0.119817	0.016635
13488764	2004	28	21-40	White	I	T1	N0	M0	Localized	Yes	No/Unknown	Alive	154	Alive	-0.608511	-0.808636	-0.285629	-0.367709
13489725	2004	26	21-40	White	I	T1	N0	M0	Localized	Yes	No/Unknown	Alive	153	Alive	-0.608511	-0.808636	-0.285629	-0.367709
13490199	2004	55	41-60	White	III	T2	N0	M1	Distant	Yes	No/Unknown	Testis	2	Dead	2.52463	3.24695	1.95054	2.55748
13490386	2004	25	21-40	White	I	T1	N0	M0	Localized	Yes	No/Unknown	Alive	148	Alive	-0.608511	-0.808636	-0.285629	-0.367709
13490593	2005	47	41-60	White	I	T1	N0	M0	Localized	Yes	Yes	Alive	140	Alive	0.071422	0.051585	-0.285629	-0.367709
13491581	2004	22	21-40	White	I	T1	N0	M0	Localized	Yes	No/Unknown	Alive	76	Alive	-0.608511	-0.808636	-0.285629	-0.367709
13492245	2004	46	41-60	White	I	T1	N0	M0	Localized	Yes	Yes	Alive	149	Alive	0.071422	0.051585	-0.285629	-0.367709
13492251	2004	45	41-60	White	I	T1	N0	M0	Localized	Yes	No/Unknown	Alive	150	Alive	0.071422	-0.351317	-0.285629	-0.367709
13492277	2004	4	0-20	White	I	T2	N0	M0	Localized	Yes	No/Unknown	Alive	151	Alive	-1.28845	-1.14504	-0.082906	-0.175537
13493464	2004	41	41-60	White	I	T1	N0	M0	Localized	Yes	Yes	Alive	154	Alive	0.071422	0.051585	-0.285629	-0.367709
13494063	2004	17	0-20	White	I	T2	N0	M0	Localized	Yes	No/Unknown	Alive	152	Alive	-1.28845	-1.14504	-0.082906	-0.175537
13494066	2004	13	0-20	White	III	T1	N0	M1	Distant	Yes	No/Unknown	Alive	148	Alive	1.16476	2.21139	1.74782	2.36531
13494120	2004	32	21-40	White	I	T1	N0	M0	Localized	Yes	No/Unknown	Alive	144	Alive	-0.608511	-0.808636	-0.285629	-0.367709
13494261	2004	34	21-40	White	I	T1	N0	M0	Localized	Yes	No/Unknown	Alive	149	Alive	-0.608511	-0.808636	-0.285629	-0.367709
13495392	2005	38	21-40	White	I	T1	N0	M0	Localized	Yes	No/Unknown	Alive	141	Alive	-0.608511	-0.808636	-0.285629	-0.367709
13495503	2005	41	41-60	White	I	T2	N0	M0	Localized	Yes	Yes	Alive	140	Alive	0.071422	0.172504	-0.082906	-0.175537
13495648	2005	54	41-60	White	I	T2	N0	M0	Localized	Yes	Yes	Alive	136	Alive	0.071422	0.172504	-0.082906	-0.175537
13495698	2005	42	41-60	White	I	T1	N0	M0	Localized	Yes	Yes	Alive	133	Alive	0.071422	0.051585	-0.285629	-0.367709
13495816	2004	41	41-60	White	II	T2	N1	M0	Regional	Yes	No/Unknown	Alive	154	Alive	1.29803	1.01305	-0.027292	-0.056176
13498142	2005	36	21-40	White	I	T1	N0	M0	Localized	Yes	Yes	Alive	141	Alive	-0.608511	-0.405734	-0.285629	-0.367709
13498551	2005	29	21-40	White	I	T2	N0	M0	Localized	Yes	No/Unknown	Alive	138	Alive	-0.608511	-0.687716	-0.082906	-0.175537
13498800	2005	30	21-40	White	I	T1	N0	M0	Localized	Yes	Yes	Alive	137	Alive	-0.608511	-0.405734	-0.285629	-0.367709
13501993	2006	47	41-60	Black	I	T2	N0	M0	Localized	Yes	No/Unknown	Alive	130	Alive	0.215574	0.042548	-0.082906	-0.175537
13502122	2005	38	21-40	White	I	T1	N0	M0	Localized	Yes	Yes	Alive	133	Alive	-0.608511	-0.405734	-0.285629	-0.367709
13504111	2004	31	21-40	White	II	T1	N3	M0	Regional	Yes	No/Unknown	Alive	16	Alive	0.618093	0.434813	-0.118788	-0.009625
13504666	2005	37	21-40	White	I	T1	N0	M0	Localized	Yes	No/Unknown	Alive	136	Alive	-0.608511	-0.808636	-0.285629	-0.367709
13504753	2005	17	0-20	White	I	T1	N0	M0	Regional	Yes	No/Unknown	Alive	132	Alive	-0.397811	-0.407723	-0.285629	-0.367709
13506189	2005	34	21-40	White	I	T1	N0	M0	Localized	Yes	No/Unknown	Alive	139	Alive	-0.608511	-0.808636	-0.285629	-0.367709
13507203	2006	51	41-60	White	I	T1	N0	M0	Localized	Yes	Yes	Alive	130	Alive	0.071422	0.051585	-0.285629	-0.367709
13508063	2005	47	41-60	Black	III	T1	N2	M0	Regional	Yes	No/Unknown	Alive	138	Alive	1.77815	1.55029	-0.174402	-0.128986
13508498	2005	20	0-20	White	I	T1	N0	M0	Localized	Yes	No/Unknown	Alive	140	Alive	-1.28845	-1.26595	-0.285629	-0.367709
13508906	2005	21	21-40	White	I	T1	N0	M0	Localized	Yes	No/Unknown	Alive	133	Alive	-0.608511	-0.808636	-0.285629	-0.367709
13511347	2005	43	41-60	White	III	T2	N2	M0	Regional	Yes	Yes	Alive	141	Alive	1.634	1.80117	0.028322	0.063186
13511737	2005	23	21-40	White	III	T1	N0	M1	Distant	Yes	No/Unknown	Alive	115	Alive	1.8447	2.66871	1.74782	2.36531
13513781	2005	30	21-40	White	I	T1	N0	M0	Localized	Yes	Yes	Alive	141	Alive	-0.608511	-0.405734	-0.285629	-0.367709
13514297	2005	37	21-40	White	II	T1	N3	M0	Regional	Yes	No/Unknown	Alive	140	Alive	0.618093	0.434813	-0.118788	-0.009625
13515984	2005	31	21-40	White	I	T1	N0	M0	Localized	Yes	No/Unknown	Alive	139	Alive	-0.608511	-0.808636	-0.285629	-0.367709
13516571	2005	42	41-60	White	I	T1	N0	M0	Localized	Yes	Yes	Alive	135	Alive	0.071422	0.051585	-0.285629	-0.367709
13517039	2005	33	21-40	White	I	T1	N0	M0	Localized	Yes	Yes	Alive	133	Alive	-0.608511	-0.405734	-0.285629	-0.367709
13517204	2005	44	41-60	White	I	T1	N0	M0	Regional	Yes	Yes	Alive	133	Alive	0.962056	0.909816	-0.285629	-0.367709
13518231	2005	20	0-20	White	I	T1	N0	M0	Localized	Yes	No/Unknown	Alive	136	Alive	-1.28845	-1.26595	-0.285629	-0.367709
13518247	2005	29	21-40	White	I	T1	N0	M0	Localized	Yes	Yes	Alive	136	Alive	-0.608511	-0.405734	-0.285629	-0.367709
13920324	2006	23	21-40	White	III	T2	N0	M1	Distant	Yes	No/Unknown	Symptoms, Signs and Ill-Defined Conditions	117	Dead	1.8447	2.78963	1.95054	2.55748
13920460	2005	53	41-60	Others	I	T2	N0	M0	Localized	Yes	No/Unknown	Alive	136	Alive	0.359727	0.315493	-0.082906	-0.175537
13920847	2006	39	21-40	White	I	T2	N0	M0	Localized	Yes	No/Unknown	Alive	127	Alive	-0.608511	-0.687716	-0.082906	-0.175537
13923264	2005	45	41-60	White	II	T1	N1	M0	Regional	Yes	No/Unknown	Alive	140	Alive	1.29803	0.892132	-0.230016	-0.248348
13923715	2006	37	21-40	White	I	T1	N0	M0	Localized	Yes	Yes	Alive	131	Alive	-0.608511	-0.405734	-0.285629	-0.367709
13925024	2005	42	41-60	White	I	T1	N0	M0	Localized	Yes	Yes	Alive	143	Alive	0.071422	0.051585	-0.285629	-0.367709
13925345	2005	21	21-40	White	I	T1	N0	M0	Localized	Yes	Yes	Alive	140	Alive	-0.608511	-0.405734	-0.285629	-0.367709
13928215	2005	37	21-40	White	I	T1	N0	M0	Localized	Yes	Yes	Alive	138	Alive	-0.608511	-0.405734	-0.285629	-0.367709
13928218	2005	34	21-40	White	I	T1	N0	M0	Localized	Yes	Yes	Alive	140	Alive	-0.608511	-0.405734	-0.285629	-0.367709
13928222	2005	16	0-20	White	I	T1	N0	M0	Localized	Yes	No/Unknown	Alive	138	Alive	-1.28845	-1.26595	-0.285629	-0.367709
13928461	2005	38	21-40	White	I	T1	N0	M0	Localized	Yes	No/Unknown	Alive	139	Alive	-0.608511	-0.808636	-0.285629	-0.367709
13928642	2005	32	21-40	White	I	T1	N0	M0	Localized	Yes	No/Unknown	Alive	143	Alive	-0.608511	-0.808636	-0.285629	-0.367709
13928820	2005	50	41-60	White	I	T1	N0	M0	Localized	Yes	Yes	Alive	139	Alive	0.071422	0.051585	-0.285629	-0.367709
13929831	2005	23	21-40	White	I	T2	N0	M0	Localized	Yes	Yes	Alive	143	Alive	-0.608511	-0.284814	-0.082906	-0.175537
13929928	2005	30	21-40	White	I	T3	N0	M0	Regional	Yes	Yes	Alive	141	Alive	0.282123	0.694337	0.119817	0.016635
13931348	2005	36	21-40	White	I	T1	N0	M0	Localized	Yes	No/Unknown	Alive	135	Alive	-0.608511	-0.808636	-0.285629	-0.367709
13931421	2005	52	41-60	White	I	T1	N0	M0	Localized	Yes	No/Unknown	Alive	141	Alive	0.071422	-0.351317	-0.285629	-0.367709
13931722	2005	32	21-40	White	I	T1	N0	M0	Regional	Yes	Yes	Alive	135	Alive	0.282123	0.452498	-0.285629	-0.367709
13932477	2005	49	41-60	White	I	T1	N0	M0	Localized	Yes	No/Unknown	Other Cause of Death	117	Dead	0.071422	-0.351317	-0.285629	-0.367709
13932492	2005	29	21-40	White	I	T1	N0	M0	Localized	Yes	No/Unknown	Alive	135	Alive	-0.608511	-0.808636	-0.285629	-0.367709
13932579	2005	27	21-40	White	II	T1	N1	M0	Regional	Yes	No/Unknown	Alive	142	Alive	0.618093	0.434813	-0.230016	-0.248348
13933941	2005	28	21-40	White	I	T2	N0	M0	Localized	Yes	No/Unknown	Alive	136	Alive	-0.608511	-0.687716	-0.082906	-0.175537
13934065	2005	36	21-40	White	I	T1	N0	M0	Localized	Yes	No/Unknown	Alive	142	Alive	-0.608511	-0.808636	-0.285629	-0.367709
13934300	2005	45	41-60	White	I	T1	N0	M0	Localized	Yes	Yes	Alive	141	Alive	0.071422	0.051585	-0.285629	-0.367709
13934319	2005	24	21-40	White	I	T1	N0	M0	Localized	Yes	Yes	Alive	142	Alive	-0.608511	-0.405734	-0.285629	-0.367709
13934535	2005	32	21-40	White	I	T1	N0	M0	Localized	Yes	No/Unknown	Alive	104	Alive	-0.608511	-0.808636	-0.285629	-0.367709
13934990	2005	36	21-40	White	I	T1	N0	M0	Localized	Yes	No/Unknown	Alive	143	Alive	-0.608511	-0.808636	-0.285629	-0.367709
13935976	2006	24	21-40	Black	III	T2	N3	M1	Distant	Yes	No/Unknown	Alive	97	Alive	1.98885	3.06257	2.11738	2.91556
13936297	2005	18	0-20	White	II	T1	N1	M0	Regional	Yes	No/Unknown	Alive	137	Alive	-0.061841	-0.022506	-0.230016	-0.248348
13936602	2005	34	21-40	White	I	T1	N0	M0	Localized	Yes	No/Unknown	Alive	133	Alive	-0.608511	-0.808636	-0.285629	-0.367709
13937100	2005	27	21-40	White	III	T2	N2	M1	Distant	Yes	No/Unknown	Alive	141	Alive	1.8447	2.78963	2.06177	2.7962
13937542	2005	30	21-40	Others	I	T1	N0	M0	Localized	Yes	No/Unknown	Alive	138	Alive	-0.320207	-0.262745	-0.285629	-0.367709
13937684	2005	41	41-60	White	I	T1	N0	M0	Localized	Yes	Yes	Alive	142	Alive	0.071422	0.051585	-0.285629	-0.367709
13938546	2005	36	21-40	White	III	T1	N3	M0	Distant	Yes	No/Unknown	Alive	134	Alive	1.8447	1.67826	-0.118788	-0.009625
13938869	2005	44	41-60	White	I	T2	N0	M0	Localized	Yes	No/Unknown	Alive	137	Alive	0.071422	-0.230397	-0.082906	-0.175537
13939794	2006	40	21-40	White	I	T1	N0	M0	Localized	Yes	Yes	Alive	126	Alive	-0.608511	-0.405734	-0.285629	-0.367709
13939826	2005	51	41-60	White	I	T1	N0	M0	Localized	Yes	Yes	Alive	137	Alive	0.071422	0.051585	-0.285629	-0.367709
13940157	2006	43	41-60	White	II	T2	N2	M0	Regional	Yes	Yes	Alive	129	Alive	1.29803	1.41595	0.028322	0.063186
13942617	2006	42	41-60	White	III	T1	N0	M1	Distant	Yes	Yes	Alive	128	Alive	2.52463	3.52893	1.74782	2.36531
13943447	2006	27	21-40	White	I	T2	N0	M0	Localized	Yes	No/Unknown	Alive	126	Alive	-0.608511	-0.687716	-0.082906	-0.175537
13945061	2006	39	21-40	White	I	T1	N0	M0	Localized	Yes	No/Unknown	Alive	128	Alive	-0.608511	-0.808636	-0.285629	-0.367709
13947186	2006	22	21-40	White	I	T3	N0	M0	Regional	Yes	Yes	In situ, benign or unknown behavior neoplasm	12	Dead	0.282123	0.694337	0.119817	0.016635
13947493	2006	42	41-60	White	I	T1	N0	M0	Localized	Yes	Yes	Alive	130	Alive	0.071422	0.051585	-0.285629	-0.367709
13947623	2006	34	21-40	Black	I	T1	N0	M0	Localized	Yes	Yes	Alive	124	Alive	-0.464359	-0.132789	-0.285629	-0.367709
13948234	2006	39	21-40	White	I	T2	N0	M0	Localized	Yes	Yes	Alive	131	Alive	-0.608511	-0.284814	-0.082906	-0.175537
13949961	2006	36	21-40	White	II	T2	N1	M0	Regional	Yes	No/Unknown	Alive	121	Alive	0.618093	0.555733	-0.027292	-0.056176
13950145	2006	26	21-40	White	III	T3	N1	M1	Distant	Yes	No/Unknown	Alive	128	Alive	1.8447	2.91055	2.20888	2.86901
13952959	2006	33	21-40	White	I	T1	N0	M0	Localized	Yes	No/Unknown	Alive	126	Alive	-0.608511	-0.808636	-0.285629	-0.367709
13952963	2006	35	21-40	White	I	T1	N0	M0	Localized	Yes	No/Unknown	Alive	125	Alive	-0.608511	-0.808636	-0.285629	-0.367709
13953035	2006	35	21-40	White	I	T1	N0	M0	Localized	Yes	Yes	Alive	129	Alive	-0.608511	-0.405734	-0.285629	-0.367709
13953037	2006	26	21-40	White	I	T1	N0	M0	Localized	Yes	No/Unknown	Alive	129	Alive	-0.608511	-0.808636	-0.285629	-0.367709
13953082	2006	26	21-40	White	III	T2	N2	M1	Distant	Yes	No/Unknown	Alive	106	Alive	1.8447	2.78963	2.06177	2.7962
13953098	2006	32	21-40	White	I	T1	N0	M0	Localized	Yes	No/Unknown	Alive	125	Alive	-0.608511	-0.808636	-0.285629	-0.367709
13953416	2006	26	21-40	Others	I	T3	N0	M0	Regional	Yes	No/Unknown	Alive	123	Alive	0.570427	0.837326	0.119817	0.016635
13953648	2006	25	21-40	Black	I	T2	N0	M0	Localized	Yes	No/Unknown	Alive	120	Alive	-0.464359	-0.414771	-0.082906	-0.175537
13953654	2006	30	21-40	White	I	T2	N0	M0	Localized	Yes	Yes	Alive	122	Alive	-0.608511	-0.284814	-0.082906	-0.175537
13954576	2006	37	21-40	White	I	T1	N0	M0	Localized	Yes	Yes	Alive	126	Alive	-0.608511	-0.405734	-0.285629	-0.367709
13954781	2006	44	41-60	White	I	T3	N0	M0	Regional	Yes	No/Unknown	Alive	131	Alive	0.962056	0.748754	0.119817	0.016635
13957198	2006	30	21-40	White	I	T1	N0	M0	Localized	Yes	No/Unknown	Alive	122	Alive	-0.608511	-0.808636	-0.285629	-0.367709
13958756	2006	28	21-40	White	I	T1	N0	M0	Localized	Yes	No/Unknown	Alive	121	Alive	-0.608511	-0.808636	-0.285629	-0.367709
13958764	2006	18	0-20	White	I	T1	N0	M0	Localized	Yes	Yes	Alive	127	Alive	-1.28845	-0.863053	-0.285629	-0.367709
13960106	2006	49	41-60	White	II	T1	N1	M0	Regional	Yes	No/Unknown	Alive	120	Alive	1.29803	0.892132	-0.230016	-0.248348
13960341	2006	47	41-60	White	I	T1	N0	M0	Localized	Yes	No/Unknown	Alive	124	Alive	0.071422	-0.351317	-0.285629	-0.367709
13960396	2006	54	41-60	White	I	T1	N0	M0	Localized	Yes	Yes	Alive	120	Alive	0.071422	0.051585	-0.285629	-0.367709
13960546	2006	54	41-60	White	I	T1	N0	M0	Localized	Yes	No/Unknown	Alive	120	Alive	0.071422	-0.351317	-0.285629	-0.367709
13961326	2006	42	41-60	White	II	T1	N1	M0	Regional	Yes	No/Unknown	Alive	130	Alive	1.29803	0.892132	-0.230016	-0.248348
13963651	2006	51	41-60	White	III	T1	N1	M0	Regional	Yes	Yes	Chronic Liver Disease and Cirrhosis	41	Dead	1.634	1.68025	-0.230016	-0.248348
13964981	2006	44	41-60	White	I	T1	N0	M0	Localized	Yes	Yes	Alive	121	Alive	0.071422	0.051585	-0.285629	-0.367709
13966292	2006	43	41-60	White	I	T1	N0	M0	Localized	Yes	No/Unknown	Alive	128	Alive	0.071422	-0.351317	-0.285629	-0.367709
13967072	2007	29	21-40	White	I	T1	N0	M0	Localized	Yes	No/Unknown	Alive	118	Alive	-0.608511	-0.808636	-0.285629	-0.367709
13970259	2006	41	41-60	White	I	T1	N0	M0	Localized	Yes	Yes	Alive	121	Alive	0.071422	0.051585	-0.285629	-0.367709
13970790	2006	52	41-60	White	I	T2	N0	M0	Localized	Yes	No/Unknown	Alive	125	Alive	0.071422	-0.230397	-0.082906	-0.175537
13971428	2006	31	21-40	White	I	T1	N0	M0	Localized	Yes	Yes	Alive	125	Alive	-0.608511	-0.405734	-0.285629	-0.367709
13971440	2006	29	21-40	White	I	T2	N0	M0	Regional	Yes	Yes	Alive	128	Alive	0.282123	0.573417	-0.082906	-0.175537
13971578	2006	51	41-60	Black	I	T3	N0	M0	Regional	Yes	No/Unknown	Alive	122	Alive	1.10621	1.0217	0.119817	0.016635
13974563	2006	41	41-60	White	I	T2	N0	M0	Localized	Yes	Yes	Alive	129	Alive	0.071422	0.172504	-0.082906	-0.175537
13975841	2007	25	21-40	White	I	T1	N0	M0	Localized	Yes	No/Unknown	Alive	118	Alive	-0.608511	-0.808636	-0.285629	-0.367709
13975873	2007	50	41-60	White	I	T1	N0	M0	Localized	Yes	No/Unknown	Alive	119	Alive	0.071422	-0.351317	-0.285629	-0.367709
13975888	2007	30	21-40	Others	I	T1	N0	M0	Localized	Yes	No/Unknown	Alive	119	Alive	-0.320207	-0.262745	-0.285629	-0.367709
13976210	2007	47	41-60	White	I	T2	N0	M0	Localized	Yes	No/Unknown	Alive	110	Alive	0.071422	-0.230397	-0.082906	-0.175537
13976487	2007	43	41-60	White	I	T1	N0	M0	Localized	Yes	No/Unknown	Alive	117	Alive	0.071422	-0.351317	-0.285629	-0.367709
13977314	2007	40	21-40	White	II	T1	N3	M0	Regional	Yes	No/Unknown	Alive	116	Alive	0.618093	0.434813	-0.118788	-0.009625
13977959	2007	42	41-60	White	I	T1	N0	M0	Localized	Yes	No/Unknown	Other Cause of Death	110	Dead	0.071422	-0.351317	-0.285629	-0.367709
13980231	2006	40	21-40	White	I	T1	N0	M0	Localized	Yes	No/Unknown	Alive	127	Alive	-0.608511	-0.808636	-0.285629	-0.367709
13981813	2007	21	21-40	White	I	T1	N0	M0	Localized	Yes	No/Unknown	Alive	115	Alive	-0.608511	-0.808636	-0.285629	-0.367709
13982397	2007	26	21-40	White	I	T2	N0	M0	Localized	Yes	No/Unknown	Alive	118	Alive	-0.608511	-0.687716	-0.082906	-0.175537
13983685	2007	33	21-40	Black	II	T1	N1	M0	Regional	Yes	Yes	Alive	119	Alive	0.762245	1.11066	-0.230016	-0.248348
13983688	2007	40	21-40	White	I	T1	N0	M0	Localized	Yes	Yes	Alive	118	Alive	-0.608511	-0.405734	-0.285629	-0.367709
13983696	2007	23	21-40	White	I	T1	N0	M0	Localized	Yes	No/Unknown	Alive	116	Alive	-0.608511	-0.808636	-0.285629	-0.367709
13984998	2007	40	21-40	White	III	T1	N0	M1	Distant	Yes	No/Unknown	Alive	1	Alive	1.8447	2.66871	1.74782	2.36531
13986239	2007	51	41-60	White	I	T2	N0	M0	Localized	Yes	No/Unknown	Alive	114	Alive	0.071422	-0.230397	-0.082906	-0.175537
13986345	2007	31	21-40	Others	I	T1	N0	M0	Localized	Yes	Yes	Alive	119	Alive	-0.320207	0.140156	-0.285629	-0.367709
13986349	2007	21	21-40	White	I	T2	N0	M0	Localized	Yes	No/Unknown	Alive	116	Alive	-0.608511	-0.687716	-0.082906	-0.175537
13987824	2007	40	21-40	White	I	T2	N0	M0	Localized	Yes	No/Unknown	Alive	110	Alive	-0.608511	-0.687716	-0.082906	-0.175537
13988680	2007	37	21-40	White	I	T1	N0	M0	Localized	Yes	No/Unknown	Alive	119	Alive	-0.608511	-0.808636	-0.285629	-0.367709
13989690	2007	39	21-40	White	I	T1	N0	M0	Localized	Yes	No/Unknown	Alive	108	Alive	-0.608511	-0.808636	-0.285629	-0.367709
13990312	2007	23	21-40	White	III	T1	N0	M1	Distant	Yes	No/Unknown	Testis	50	Dead	1.8447	2.66871	1.74782	2.36531
13990615	2007	35	21-40	White	I	T1	N0	M0	Localized	Yes	Yes	Alive	10	Alive	-0.608511	-0.405734	-0.285629	-0.367709
13990876	2007	28	21-40	White	I	T1	N0	M0	Localized	Yes	Yes	Alive	116	Alive	-0.608511	-0.405734	-0.285629	-0.367709
13991454	2008	42	41-60	White	I	T1	N0	M0	Localized	Yes	Yes	Alive	106	Alive	0.071422	0.051585	-0.285629	-0.367709
13992043	2007	44	41-60	White	I	T2	N0	M0	Localized	Yes	Yes	Alive	112	Alive	0.071422	0.172504	-0.082906	-0.175537
13992048	2007	35	21-40	White	I	T1	N0	M0	Localized	Yes	No/Unknown	Alive	114	Alive	-0.608511	-0.808636	-0.285629	-0.367709
13992798	2007	38	21-40	White	I	T1	N0	M0	Localized	Yes	No/Unknown	Alive	114	Alive	-0.608511	-0.808636	-0.285629	-0.367709
13992945	2007	43	41-60	White	II	T1	N2	M0	Regional	Yes	Yes	Alive	116	Alive	1.29803	1.29503	-0.174402	-0.128986
13993353	2007	48	41-60	White	I	T1	N0	M0	Localized	Yes	No/Unknown	Other Cause of Death	39	Dead	0.071422	-0.351317	-0.285629	-0.367709
13993360	2007	36	21-40	Others	I	T2	N0	M0	Localized	Yes	No/Unknown	Alive	4	Alive	-0.320207	-0.141825	-0.082906	-0.175537
13993440	2007	48	41-60	White	II	T1	N3	M0	Regional	Yes	No/Unknown	Alive	109	Alive	1.29803	0.892132	-0.118788	-0.009625
13993453	2007	50	41-60	Black	I	T1	N0	M0	Localized	Yes	No/Unknown	Alive	111	Alive	0.215574	-0.078372	-0.285629	-0.367709
13993552	2007	42	41-60	White	I	T1	N0	M0	Localized	Yes	No/Unknown	Alive	111	Alive	0.071422	-0.351317	-0.285629	-0.367709
13994015	2004	22	21-40	White	I	T1	N0	M0	Localized	Yes	Yes	Alive	144	Alive	-0.608511	-0.405734	-0.285629	-0.367709
13994346	2007	45	41-60	White	I	T2	N0	M0	Localized	Yes	Yes	Alive	110	Alive	0.071422	0.172504	-0.082906	-0.175537
13994354	2007	50	41-60	White	I	T1	N0	M0	Localized	Yes	No/Unknown	Alive	110	Alive	0.071422	-0.351317	-0.285629	-0.367709
13995663	2007	34	21-40	White	III	T2	N0	M1	Distant	Yes	No/Unknown	Alive	109	Alive	1.8447	2.78963	1.95054	2.55748
13995695	2007	35	21-40	Others	I	T1	N0	M0	Localized	Yes	Yes	Alive	54	Alive	-0.320207	0.140156	-0.285629	-0.367709
13996107	2007	42	41-60	Black	I	T1	N0	M0	Localized	Yes	No/Unknown	Alive	116	Alive	0.215574	-0.078372	-0.285629	-0.367709
13998021	2007	27	21-40	Black	I	T3	N0	M0	Regional	Yes	Yes	Alive	2	Alive	0.426275	0.967282	0.119817	0.016635
13999848	2007	31	21-40	White	I	T1	N0	M0	Localized	Yes	No/Unknown	Alive	109	Alive	-0.608511	-0.808636	-0.285629	-0.367709
14000056	2007	32	21-40	Black	I	T1	N0	M0	Localized	Yes	No/Unknown	Alive	117	Alive	-0.464359	-0.53569	-0.285629	-0.367709
14000918	2007	58	41-60	White	I	T1	N0	M0	Localized	Yes	No/Unknown	Alive	114	Alive	0.071422	-0.351317	-0.285629	-0.367709
14001556	2007	50	41-60	White	I	T2	N0	M0	Localized	Yes	No/Unknown	Alive	111	Alive	0.071422	-0.230397	-0.082906	-0.175537
14002648	2007	26	21-40	White	I	T1	N0	M0	Localized	Yes	No/Unknown	Alive	0	Alive	-0.608511	-0.808636	-0.285629	-0.367709
14003737	2007	38	21-40	White	I	T2	N0	M0	Regional	Yes	No/Unknown	Alive	108	Alive	0.282123	0.170516	-0.082906	-0.175537
14004570	2007	17	0-20	White	I	T1	N0	M0	Localized	Yes	No/Unknown	Alive	111	Alive	-1.28845	-1.26595	-0.285629	-0.367709
14004573	2007	25	21-40	White	I	T2	N0	M0	Localized	Yes	No/Unknown	Alive	108	Alive	-0.608511	-0.687716	-0.082906	-0.175537
14004640	2007	35	21-40	White	I	T1	N0	M0	Localized	Yes	No/Unknown	Alive	111	Alive	-0.608511	-0.808636	-0.285629	-0.367709
14005092	2007	32	21-40	White	III	T3	N2	M1	Distant	Yes	No/Unknown	Alive	113	Alive	1.8447	2.91055	2.26449	2.98837
14005457	2007	17	0-20	White	I	T2	N0	M0	Localized	Yes	No/Unknown	Alive	111	Alive	-1.28845	-1.14504	-0.082906	-0.175537
14005466	2007	28	21-40	White	I	T1	N0	M0	Localized	Yes	No/Unknown	Alive	65	Alive	-0.608511	-0.808636	-0.285629	-0.367709
14006601	2007	38	21-40	White	I	T1	N0	M0	Localized	Yes	No/Unknown	Alive	112	Alive	-0.608511	-0.808636	-0.285629	-0.367709
14006985	2008	34	21-40	Black	I	T2	N0	M0	Localized	Yes	No/Unknown	Alive	101	Alive	-0.464359	-0.414771	-0.082906	-0.175537
14008420	2007	36	21-40	White	I	T1	N0	M0	Localized	Yes	Yes	Alive	110	Alive	-0.608511	-0.405734	-0.285629	-0.367709
14008577	2008	34	21-40	White	I	T1	N0	M0	Localized	Yes	No/Unknown	Alive	103	Alive	-0.608511	-0.808636	-0.285629	-0.367709
14008878	2007	41	41-60	White	I	T2	N0	M0	Localized	Yes	No/Unknown	Alive	108	Alive	0.071422	-0.230397	-0.082906	-0.175537
14009251	2008	29	21-40	White	I	T2	N0	M0	Regional	Yes	Yes	Alive	107	Alive	0.282123	0.573417	-0.082906	-0.175537
14009364	2007	35	21-40	Others	I	T1	N0	M0	Localized	Yes	No/Unknown	Alive	108	Alive	-0.320207	-0.262745	-0.285629	-0.367709
14010736	2007	28	21-40	White	I	T1	N0	M0	Localized	Yes	Yes	Alive	63	Alive	-0.608511	-0.405734	-0.285629	-0.367709
14010882	2007	39	21-40	White	I	T2	N0	M0	Localized	Yes	No/Unknown	Alive	113	Alive	-0.608511	-0.687716	-0.082906	-0.175537
14011630	2007	31	21-40	White	I	T1	N0	M0	Localized	Yes	No/Unknown	Alive	114	Alive	-0.608511	-0.808636	-0.285629	-0.367709
14011847	2007	39	21-40	White	I	T2	N0	M0	Localized	Yes	Yes	Alive	110	Alive	-0.608511	-0.284814	-0.082906	-0.175537
14012129	2007	16	0-20	White	I	T2	N0	M0	Localized	Yes	No/Unknown	Alive	108	Alive	-1.28845	-1.14504	-0.082906	-0.175537
14014444	2008	44	41-60	White	I	T1	N0	M0	Localized	Yes	No/Unknown	Alive	99	Alive	0.071422	-0.351317	-0.285629	-0.367709
14014469	2008	55	41-60	White	I	T1	N0	M0	Localized	Yes	Yes	Alive	105	Alive	0.071422	0.051585	-0.285629	-0.367709
14015401	2008	24	21-40	White	III	T3	N1	M0	Distant	Yes	No/Unknown	Alive	99	Alive	1.8447	1.9201	0.175431	0.135997
14015716	2007	57	41-60	White	I	T1	N0	M0	Localized	Yes	Yes	Alive	118	Alive	0.071422	0.051585	-0.285629	-0.367709
14016536	2008	28	21-40	White	I	T1	N0	M0	Localized	Yes	No/Unknown	Alive	105	Alive	-0.608511	-0.808636	-0.285629	-0.367709
14017299	2008	53	41-60	Black	I	T1	N0	M0	Localized	Yes	Yes	Alive	98	Alive	0.215574	0.32453	-0.285629	-0.367709
14018843	2008	27	21-40	White	I	T1	N0	M0	Localized	Yes	Yes	Alive	103	Alive	-0.608511	-0.405734	-0.285629	-0.367709
14018853	2008	19	0-20	White	I	T2	N0	M0	Localized	Yes	No/Unknown	Alive	100	Alive	-1.28845	-1.14504	-0.082906	-0.175537
14018904	2008	24	21-40	White	II	T1	N1	M0	Regional	Yes	No/Unknown	Alive	107	Alive	0.618093	0.434813	-0.230016	-0.248348
14019513	2008	51	41-60	White	I	T1	N0	M0	Localized	Yes	No/Unknown	Alive	98	Alive	0.071422	-0.351317	-0.285629	-0.367709
14019540	2008	47	41-60	White	I	T2	N0	M0	Regional	Yes	Yes	Alive	101	Alive	0.962056	1.03074	-0.082906	-0.175537
14021727	2008	46	41-60	White	I	T1	N0	M0	Localized	Yes	No/Unknown	Alive	102	Alive	0.071422	-0.351317	-0.285629	-0.367709
14022388	2008	52	41-60	White	III	T3	N1	M0	Regional	Yes	No/Unknown	Alive	101	Alive	1.634	1.51919	0.175431	0.135997
14023360	2008	52	41-60	White	I	T2	N0	M0	Localized	Yes	Yes	Alive	100	Alive	0.071422	0.172504	-0.082906	-0.175537
14023365	2008	40	21-40	White	II	T2	N2	M0	Regional	Yes	No/Unknown	Alive	102	Alive	0.618093	0.555733	0.028322	0.063186
14024313	2008	42	41-60	White	II	T3	N1	M0	Regional	Yes	No/Unknown	Alive	99	Alive	1.29803	1.13397	0.175431	0.135997
14024867	2008	43	41-60	White	I	T1	N0	M0	Localized	Yes	No/Unknown	Alive	69	Alive	0.071422	-0.351317	-0.285629	-0.367709
14026307	2008	27	21-40	White	III	T2	N0	M1	Distant	Yes	No/Unknown	Alive	107	Alive	1.8447	2.78963	1.95054	2.55748
14026541	2008	36	21-40	White	I	T1	N0	M0	Localized	Yes	Yes	Alive	106	Alive	-0.608511	-0.405734	-0.285629	-0.367709
14027131	2008	19	0-20	White	I	T1	N0	M0	Localized	Yes	No/Unknown	Alive	96	Alive	-1.28845	-1.26595	-0.285629	-0.367709
14028104	2008	34	21-40	White	III	T1	N3	M1	Distant	Yes	No/Unknown	Alive	99	Alive	1.8447	2.66871	1.91466	2.72339
14028113	2008	31	21-40	White	I	T2	N0	M0	Localized	Yes	Yes	Alive	103	Alive	-0.608511	-0.284814	-0.082906	-0.175537
14028255	2008	25	21-40	White	I	T2	N0	M0	Regional	Yes	No/Unknown	Alive	107	Alive	0.282123	0.170516	-0.082906	-0.175537
14030595	2008	47	41-60	White	I	T1	N0	M0	Localized	Yes	Yes	Alive	100	Alive	0.071422	0.051585	-0.285629	-0.367709
14032356	2008	30	21-40	White	I	T2	N0	M0	Localized	Yes	No/Unknown	Alive	96	Alive	-0.608511	-0.687716	-0.082906	-0.175537
14032376	2008	49	41-60	White	I	T1	N0	M0	Regional	Yes	Yes	Alive	97	Alive	0.962056	0.909816	-0.285629	-0.367709
14032485	2008	39	21-40	White	I	T1	N0	M0	Localized	Yes	No/Unknown	Alive	107	Alive	-0.608511	-0.808636	-0.285629	-0.367709
14032510	2008	25	21-40	White	III	T2	N2	M1	Distant	Yes	No/Unknown	Alive	107	Alive	1.8447	2.78963	2.06177	2.7962
14033590	2008	15	0-20	White	III	T4	N1	M1	Distant	Yes	Yes	Testis	46	Dead	1.16476	2.97705	2.4116	3.06118
14036671	2008	35	21-40	White	I	T1	N0	M0	Localized	Yes	Yes	Alive	100	Alive	-0.608511	-0.405734	-0.285629	-0.367709
14039669	2008	49	41-60	White	I	T1	N0	M0	Localized	Yes	No/Unknown	Alive	96	Alive	0.071422	-0.351317	-0.285629	-0.367709
14043890	2008	48	41-60	White	I	T2	N0	M0	Localized	Yes	Yes	Alive	99	Alive	0.071422	0.172504	-0.082906	-0.175537
14044911	2009	43	41-60	White	I	T1	N0	M0	Localized	Yes	No/Unknown	Alive	89	Alive	0.071422	-0.351317	-0.285629	-0.367709
14044934	2008	45	41-60	White	I	T1	N0	M0	Localized	Yes	No/Unknown	Alive	107	Alive	0.071422	-0.351317	-0.285629	-0.367709
14045294	2008	37	21-40	White	I	T1	N0	M0	Localized	Yes	Yes	Alive	103	Alive	-0.608511	-0.405734	-0.285629	-0.367709
14045893	2008	39	21-40	White	I	T1	N0	M0	Localized	Yes	Yes	Alive	99	Alive	-0.608511	-0.405734	-0.285629	-0.367709
14046508	2008	56	41-60	White	I	T1	N0	M0	Localized	Yes	Yes	Alive	100	Alive	0.071422	0.051585	-0.285629	-0.367709
14046521	2008	34	21-40	White	I	T1	N0	M0	Localized	Yes	No/Unknown	Alive	102	Alive	-0.608511	-0.808636	-0.285629	-0.367709
14049460	2009	41	41-60	Others	I	T1	N0	M0	Localized	Yes	No/Unknown	Alive	23	Alive	0.359727	0.194574	-0.285629	-0.367709
14049591	2009	43	41-60	White	III	T2	N0	M1	Distant	Yes	No/Unknown	Alive	94	Alive	2.52463	3.24695	1.95054	2.55748
14050982	2008	21	21-40	White	I	T1	N0	M0	Localized	Yes	No/Unknown	Alive	97	Alive	-0.608511	-0.808636	-0.285629	-0.367709
14051029	2008	44	41-60	White	II	T1	N3	M0	Regional	Yes	No/Unknown	Alive	96	Alive	1.29803	0.892132	-0.118788	-0.009625
14051206	2008	33	21-40	White	III	T1	N0	M1	Distant	Yes	No/Unknown	Miscellaneous Malignant Cancer	13	Dead	1.8447	2.66871	1.74782	2.36531
14051833	2008	33	21-40	White	I	T2	N0	M0	Regional	Yes	Yes	Alive	98	Alive	0.282123	0.573417	-0.082906	-0.175537
14052860	2008	31	21-40	White	I	T2	N0	M0	Localized	Yes	No/Unknown	Alive	102	Alive	-0.608511	-0.687716	-0.082906	-0.175537
14053666	2008	27	21-40	White	I	T2	N0	M0	Localized	Yes	No/Unknown	Alive	97	Alive	-0.608511	-0.687716	-0.082906	-0.175537
14053670	2008	24	21-40	White	II	T2	N2	M0	Regional	Yes	No/Unknown	Alive	98	Alive	0.618093	0.555733	0.028322	0.063186
14054121	2008	53	41-60	White	I	T1	N0	M0	Localized	Yes	No/Unknown	Alive	100	Alive	0.071422	-0.351317	-0.285629	-0.367709
14054142	2008	39	21-40	White	I	T1	N0	M0	Localized	Yes	No/Unknown	Alive	101	Alive	-0.608511	-0.808636	-0.285629	-0.367709
14054146	2008	44	41-60	White	I	T1	N0	M0	Localized	Yes	No/Unknown	Alive	96	Alive	0.071422	-0.351317	-0.285629	-0.367709
14054168	2008	61	>60	White	I	T1	N0	M0	Localized	Yes	No/Unknown	Alive	98	Alive	0.751355	0.106002	-0.285629	-0.367709
14054407	2008	28	21-40	White	I	T1	N0	M0	Localized	Yes	No/Unknown	Alive	12	Alive	-0.608511	-0.808636	-0.285629	-0.367709
14054805	2009	40	21-40	Black	I	T1	N0	M0	Localized	Yes	Yes	Alive	93	Alive	-0.464359	-0.132789	-0.285629	-0.367709
14056706	2009	29	21-40	White	I	T1	N0	M0	Localized	Yes	No/Unknown	Alive	95	Alive	-0.608511	-0.808636	-0.285629	-0.367709
14056715	2009	22	21-40	White	I	T2	N0	M0	Localized	Yes	No/Unknown	Alive	95	Alive	-0.608511	-0.687716	-0.082906	-0.175537
14056985	2009	18	0-20	White	I	T1	N0	M0	Localized	Yes	No/Unknown	Alive	89	Alive	-1.28845	-1.26595	-0.285629	-0.367709
14058956	2009	47	41-60	White	I	T1	N0	M0	Regional	Yes	No/Unknown	Alive	65	Alive	0.962056	0.506915	-0.285629	-0.367709
14059344	2009	32	21-40	White	I	T1	N0	M0	Localized	Yes	Yes	Alive	92	Alive	-0.608511	-0.405734	-0.285629	-0.367709
14060216	2009	35	21-40	White	III	T1	N0	M1	Distant	Yes	No/Unknown	Alive	20	Alive	1.8447	2.66871	1.74782	2.36531
14060348	2009	29	21-40	White	I	T2	N0	M0	Localized	Yes	No/Unknown	Alive	92	Alive	-0.608511	-0.687716	-0.082906	-0.175537
14061297	2009	39	21-40	White	I	T1	N0	M0	Localized	Yes	No/Unknown	Alive	88	Alive	-0.608511	-0.808636	-0.285629	-0.367709
14062631	2009	52	41-60	Black	II	T1	N1	M0	Regional	Yes	No/Unknown	Alive	84	Alive	1.44218	1.16508	-0.230016	-0.248348
14063395	2009	54	41-60	White	I	T2	N0	M0	Localized	Yes	No/Unknown	Alive	34	Alive	0.071422	-0.230397	-0.082906	-0.175537
14064224	2009	29	21-40	White	I	T1	N0	M0	Localized	Yes	No/Unknown	Alive	88	Alive	-0.608511	-0.808636	-0.285629	-0.367709
14065197	2009	30	21-40	White	I	T2	N0	M0	Localized	Yes	No/Unknown	Alive	82	Alive	-0.608511	-0.687716	-0.082906	-0.175537
14065240	2009	25	21-40	White	I	T1	N0	M0	Localized	Yes	No/Unknown	Alive	22	Alive	-0.608511	-0.808636	-0.285629	-0.367709
14065870	2009	25	21-40	White	I	T1	N0	M0	Localized	Yes	No/Unknown	Alive	89	Alive	-0.608511	-0.808636	-0.285629	-0.367709
14067439	2009	49	41-60	White	I	T1	N0	M0	Localized	Yes	No/Unknown	Alive	90	Alive	0.071422	-0.351317	-0.285629	-0.367709
14069920	2009	23	21-40	White	III	T1	N0	M1	Distant	Yes	No/Unknown	Alive	5	Alive	1.8447	2.66871	1.74782	2.36531
14071356	2009	30	21-40	White	I	T2	N0	M0	Regional	Yes	No/Unknown	Alive	92	Alive	0.282123	0.170516	-0.082906	-0.175537
14071507	2009	37	21-40	White	I	T1	N0	M0	Localized	Yes	No/Unknown	Alive	87	Alive	-0.608511	-0.808636	-0.285629	-0.367709
14071957	2009	17	0-20	White	III	T1	N1	M0	Regional	Yes	No/Unknown	Alive	17	Alive	0.274129	0.362712	-0.230016	-0.248348
14072527	2009	59	41-60	White	I	T1	N0	M0	Localized	Yes	Yes	Alive	84	Alive	0.071422	0.051585	-0.285629	-0.367709
14072738	2009	32	21-40	Others	I	T1	N0	M0	Localized	Yes	No/Unknown	Alive	93	Alive	-0.320207	-0.262745	-0.285629	-0.367709
14073133	2009	48	41-60	White	I	T1	N0	M0	Localized	Yes	No/Unknown	Alive	89	Alive	0.071422	-0.351317	-0.285629	-0.367709
14073228	2009	48	41-60	White	I	T2	N0	M0	Localized	Yes	Yes	Alive	93	Alive	0.071422	0.172504	-0.082906	-0.175537
14073258	2009	20	0-20	White	I	T1	N0	M0	Localized	Yes	No/Unknown	Alive	86	Alive	-1.28845	-1.26595	-0.285629	-0.367709
14073428	2009	34	21-40	White	I	T1	N0	M0	Localized	Yes	Yes	Alive	2	Alive	-0.608511	-0.405734	-0.285629	-0.367709
14073625	2009	40	21-40	White	I	T1	N0	M0	Localized	Yes	Yes	Alive	94	Alive	-0.608511	-0.405734	-0.285629	-0.367709
14073666	2009	26	21-40	White	I	T1	N0	M0	Localized	Yes	Yes	Alive	92	Alive	-0.608511	-0.405734	-0.285629	-0.367709
14074080	2009	24	21-40	White	I	T1	N0	M0	Localized	Yes	No/Unknown	Alive	86	Alive	-0.608511	-0.808636	-0.285629	-0.367709
14074247	2009	28	21-40	White	III	T3	N2	M1	Distant	Yes	No/Unknown	Other Cause of Death	62	Dead	1.8447	2.91055	2.26449	2.98837
14075042	2009	58	41-60	White	I	T1	N0	M0	Localized	Yes	No/Unknown	Alive	88	Alive	0.071422	-0.351317	-0.285629	-0.367709
14076008	2009	32	21-40	White	III	T1	N3	M1	Distant	Yes	Yes	Alive	89	Alive	1.8447	3.07161	1.91466	2.72339
14076253	2009	27	21-40	White	I	T1	N0	M0	Regional	Yes	No/Unknown	Alive	84	Alive	0.282123	0.049596	-0.285629	-0.367709
14076349	2009	33	21-40	White	I	T1	N0	M0	Localized	Yes	No/Unknown	Alive	85	Alive	-0.608511	-0.808636	-0.285629	-0.367709
14076681	2009	33	21-40	White	III	T3	N0	M1	Distant	Yes	No/Unknown	Soft Tissue including Heart	5	Dead	1.8447	2.91055	2.15327	2.74965
14076691	2009	31	21-40	White	I	T2	N0	M0	Regional	Yes	No/Unknown	Alive	85	Alive	0.282123	0.170516	-0.082906	-0.175537
14079272	2009	53	41-60	White	I	T1	N0	M0	Localized	Yes	No/Unknown	Alive	84	Alive	0.071422	-0.351317	-0.285629	-0.367709
14079295	2009	44	41-60	Black	I	T1	N0	M0	Regional	Yes	No/Unknown	Alive	86	Alive	1.10621	0.77986	-0.285629	-0.367709
14080432	2008	27	21-40	White	I	T1	N0	M0	Regional	Yes	No/Unknown	Alive	102	Alive	0.282123	0.049596	-0.285629	-0.367709
14081884	2010	53	41-60	White	I	T2	N0	M0	Localized	Yes	No/Unknown	Alive	66	Alive	0.071422	-0.230397	-0.082906	-0.175537
14480826	2009	23	21-40	White	I	T2	N0	M0	Regional	Yes	No/Unknown	Alive	86	Alive	0.282123	0.170516	-0.082906	-0.175537
14482938	2009	34	21-40	White	I	T1	N0	M0	Localized	Yes	No/Unknown	Alive	93	Alive	-0.608511	-0.808636	-0.285629	-0.367709
14483133	2009	38	21-40	White	I	T1	N0	M0	Localized	Yes	No/Unknown	Alive	89	Alive	-0.608511	-0.808636	-0.285629	-0.367709
14483434	2009	23	21-40	White	II	T3	N2	M0	Regional	Yes	No/Unknown	Alive	84	Alive	0.618093	0.676653	0.231045	0.255358
14483716	2009	37	21-40	Black	I	T1	N0	M0	Localized	Yes	No/Unknown	Alive	5	Alive	-0.464359	-0.53569	-0.285629	-0.367709
14484441	2010	52	41-60	White	I	T1	N0	M0	Localized	Yes	Yes	Alive	78	Alive	0.071422	0.051585	-0.285629	-0.367709
14484601	2010	25	21-40	White	I	T1	N0	M0	Localized	Yes	No/Unknown	Testis	55	Dead	-0.608511	-0.808636	-0.285629	-0.367709
14484802	2010	29	21-40	White	I	T1	N0	M0	Localized	Yes	Yes	Alive	81	Alive	-0.608511	-0.405734	-0.285629	-0.367709
14484935	2010	24	21-40	White	I	T1	N0	M0	Localized	Yes	No/Unknown	Alive	82	Alive	-0.608511	-0.808636	-0.285629	-0.367709
14485255	2009	32	21-40	White	II	T1	N1	M0	Regional	Yes	Yes	Alive	89	Alive	0.618093	0.837715	-0.230016	-0.248348
14485940	2010	29	21-40	White	I	T2	N0	M0	Localized	Yes	No/Unknown	Alive	79	Alive	-0.608511	-0.687716	-0.082906	-0.175537
14486153	2009	49	41-60	White	I	T2	N0	M0	Localized	Yes	No/Unknown	Alive	88	Alive	0.071422	-0.230397	-0.082906	-0.175537
14486604	2010	42	41-60	White	III	T1	N3	M1	Distant	Yes	No/Unknown	Alive	79	Alive	2.52463	3.12603	1.91466	2.72339
14487813	2010	38	21-40	White	I	T1	N0	M0	Localized	Yes	No/Unknown	Alive	78	Alive	-0.608511	-0.808636	-0.285629	-0.367709
14487862	2010	43	41-60	Black	I	T1	N0	M0	Localized	Yes	No/Unknown	Alive	81	Alive	0.215574	-0.078372	-0.285629	-0.367709
14489462	2010	52	41-60	White	I	T1	N0	M0	Localized	Yes	No/Unknown	Alive	81	Alive	0.071422	-0.351317	-0.285629	-0.367709
14490584	2009	33	21-40	White	I	T1	N0	M0	Localized	Yes	No/Unknown	Alive	85	Alive	-0.608511	-0.808636	-0.285629	-0.367709
14490592	2009	36	21-40	White	II	T2	N1	M0	Regional	Yes	No/Unknown	Alive	84	Alive	0.618093	0.555733	-0.027292	-0.056176
14492482	2009	34	21-40	White	I	T1	N0	M0	Localized	Yes	No/Unknown	Alive	84	Alive	-0.608511	-0.808636	-0.285629	-0.367709
14493555	2009	45	41-60	White	I	T1	N0	M0	Localized	Yes	No/Unknown	Alive	91	Alive	0.071422	-0.351317	-0.285629	-0.367709
14495349	2010	48	41-60	White	I	T2	N0	M0	Localized	Yes	No/Unknown	Alive	78	Alive	0.071422	-0.230397	-0.082906	-0.175537
14495925	2009	34	21-40	White	I	T1	N0	M0	Localized	Yes	No/Unknown	Alive	89	Alive	-0.608511	-0.808636	-0.285629	-0.367709
14496007	2009	32	21-40	White	II	T2	N3	M0	Regional	Yes	No/Unknown	Alive	87	Alive	0.618093	0.555733	0.083935	0.182548
14496595	2009	17	0-20	White	II	T2	N3	M0	Regional	Yes	No/Unknown	Alive	87	Alive	-0.061841	0.098414	0.083935	0.182548
14496633	2009	40	21-40	White	I	T1	N0	M0	Localized	Yes	Yes	Alive	94	Alive	-0.608511	-0.405734	-0.285629	-0.367709
14496667	2009	38	21-40	White	I	T1	N0	M0	Localized	Yes	Yes	Alive	93	Alive	-0.608511	-0.405734	-0.285629	-0.367709
14496866	2009	49	41-60	White	I	T1	N0	M0	Localized	Yes	No/Unknown	Alive	89	Alive	0.071422	-0.351317	-0.285629	-0.367709
14496990	2010	33	21-40	White	III	T1	N0	M1	Distant	Yes	No/Unknown	Alive	78	Alive	1.8447	2.66871	1.74782	2.36531
14497634	2010	29	21-40	Others	I	T2	N0	M0	Localized	Yes	No/Unknown	Alive	82	Alive	-0.320207	-0.141825	-0.082906	-0.175537
14497652	2010	33	21-40	Others	I	T1	N0	M0	Localized	Yes	No/Unknown	Accidents and Adverse Effects	62	Dead	-0.320207	-0.262745	-0.285629	-0.367709
14498085	2010	32	21-40	White	I	T2	N0	M0	Localized	Yes	No/Unknown	Alive	82	Alive	-0.608511	-0.687716	-0.082906	-0.175537
14498145	2010	21	21-40	White	I	T1	N0	M0	Localized	Yes	Yes	Alive	75	Alive	-0.608511	-0.405734	-0.285629	-0.367709
14498153	2010	18	0-20	White	I	T1	N0	M0	Localized	Yes	No/Unknown	Alive	83	Alive	-1.28845	-1.26595	-0.285629	-0.367709
14498162	2010	23	21-40	Others	I	T1	N0	M0	Localized	Yes	No/Unknown	Alive	78	Alive	-0.320207	-0.262745	-0.285629	-0.367709
14498168	2010	30	21-40	White	II	T2	N1	M0	Regional	Yes	No/Unknown	Alive	77	Alive	0.618093	0.555733	-0.027292	-0.056176
14498171	2010	49	41-60	White	I	T1	N0	M0	Localized	Yes	No/Unknown	Alive	74	Alive	0.071422	-0.351317	-0.285629	-0.367709
14498684	2010	21	21-40	White	I	T1	N0	M0	Localized	Yes	No/Unknown	Alive	20	Alive	-0.608511	-0.808636	-0.285629	-0.367709
14499293	2010	51	41-60	White	I	T1	N0	M0	Localized	Yes	No/Unknown	Alive	76	Alive	0.071422	-0.351317	-0.285629	-0.367709
14500868	2010	25	21-40	White	I	T1	N0	M0	Localized	Yes	No/Unknown	Alive	73	Alive	-0.608511	-0.808636	-0.285629	-0.367709
14501256	2010	25	21-40	White	I	T2	N0	M0	Localized	Yes	No/Unknown	Alive	82	Alive	-0.608511	-0.687716	-0.082906	-0.175537
14501337	2010	41	41-60	White	I	T2	N0	M0	Localized	Yes	No/Unknown	Alive	80	Alive	0.071422	-0.230397	-0.082906	-0.175537
14501342	2010	35	21-40	White	I	T1	N0	M0	Localized	Yes	Yes	Alive	77	Alive	-0.608511	-0.405734	-0.285629	-0.367709
14501451	2010	39	21-40	White	I	T2	N0	M0	Localized	Yes	No/Unknown	Alive	72	Alive	-0.608511	-0.687716	-0.082906	-0.175537
14502486	2010	51	41-60	White	I	T1	N0	M0	Localized	Yes	No/Unknown	Alive	81	Alive	0.071422	-0.351317	-0.285629	-0.367709
14505429	2010	35	21-40	White	III	T1	N0	M1	Distant	Yes	No/Unknown	Alive	83	Alive	1.8447	2.66871	1.74782	2.36531
14506480	2010	30	21-40	White	III	T1	N3	M1	Distant	Yes	No/Unknown	Testis	12	Dead	1.8447	2.66871	1.91466	2.72339
14507011	2010	42	41-60	White	II	T2	N3	M0	Regional	Yes	No/Unknown	Alive	74	Alive	1.29803	1.01305	0.083935	0.182548
14507937	2010	43	41-60	White	I	T1	N0	M0	Localized	Yes	No/Unknown	Alive	74	Alive	0.071422	-0.351317	-0.285629	-0.367709
14509007	2010	22	21-40	White	II	T2	N1	M0	Regional	Yes	No/Unknown	Alive	78	Alive	0.618093	0.555733	-0.027292	-0.056176
14509022	2010	40	21-40	White	II	T2	N1	M0	Regional	Yes	No/Unknown	Alive	80	Alive	0.618093	0.555733	-0.027292	-0.056176
14509919	2010	46	41-60	White	I	T1	N0	M0	Localized	Yes	No/Unknown	Alive	74	Alive	0.071422	-0.351317	-0.285629	-0.367709
14509938	2010	38	21-40	White	I	T3	N0	M0	Regional	Yes	No/Unknown	Alive	80	Alive	0.282123	0.291436	0.119817	0.016635
14510010	2010	36	21-40	White	I	T1	N0	M0	Localized	Yes	No/Unknown	Alive	80	Alive	-0.608511	-0.808636	-0.285629	-0.367709
14510289	2010	45	41-60	White	I	T2	N0	M0	Localized	Yes	No/Unknown	Alive	75	Alive	0.071422	-0.230397	-0.082906	-0.175537
14511747	2010	59	41-60	White	I	T1	N0	M0	Localized	Yes	No/Unknown	Alive	75	Alive	0.071422	-0.351317	-0.285629	-0.367709
14511752	2010	18	0-20	Black	III	T3	N0	M1	Distant	Yes	No/Unknown	Alive	79	Alive	1.30892	2.72617	2.15327	2.74965
14511762	2010	42	41-60	White	III	T2	N0	M1	Distant	Yes	No/Unknown	Alive	72	Alive	2.52463	3.24695	1.95054	2.55748
14511765	2010	31	21-40	White	I	T1	N0	M0	Localized	Yes	No/Unknown	Alive	73	Alive	-0.608511	-0.808636	-0.285629	-0.367709
14511774	2010	48	41-60	Black	I	T1	N0	M0	Localized	Yes	No/Unknown	Alive	77	Alive	0.215574	-0.078372	-0.285629	-0.367709
14512496	2010	33	21-40	White	I	T1	N0	M0	Localized	Yes	No/Unknown	Alive	76	Alive	-0.608511	-0.808636	-0.285629	-0.367709
14512593	2010	42	41-60	White	I	T3	N0	M0	Regional	Yes	No/Unknown	Alive	80	Alive	0.962056	0.748754	0.119817	0.016635
14514314	2010	39	21-40	White	II	T1	N2	M0	Regional	Yes	No/Unknown	Alive	75	Alive	0.618093	0.434813	-0.174402	-0.128986
14515388	2010	30	21-40	White	II	T1	N2	M0	Regional	Yes	Yes	Alive	46	Alive	0.618093	0.837715	-0.174402	-0.128986
14516460	2010	25	21-40	White	III	T1	N0	M1	Distant	Yes	No/Unknown	Alive	83	Alive	1.8447	2.66871	1.74782	2.36531
14518814	2010	22	21-40	White	I	T2	N0	M0	Localized	Yes	No/Unknown	Alive	33	Alive	-0.608511	-0.687716	-0.082906	-0.175537
14519431	2010	37	21-40	White	I	T1	N0	M0	Localized	Yes	No/Unknown	Alive	79	Alive	-0.608511	-0.808636	-0.285629	-0.367709
14520944	2010	45	41-60	White	I	T1	N0	M0	Localized	Yes	No/Unknown	Alive	73	Alive	0.071422	-0.351317	-0.285629	-0.367709
14521336	2011	51	41-60	White	III	T1	N3	M1	Distant	Yes	Yes	Alive	69	Alive	2.52463	3.52893	1.91466	2.72339
14521788	2011	45	41-60	White	II	T1	N1	M0	Regional	Yes	No/Unknown	Alive	70	Alive	1.29803	0.892132	-0.230016	-0.248348
14522005	2011	19	0-20	White	II	T3	N2	M0	Regional	Yes	No/Unknown	Alive	69	Alive	-0.061841	0.219334	0.231045	0.255358
14522814	2010	25	21-40	White	I	T2	N0	M0	Localized	Yes	Yes	Alive	74	Alive	-0.608511	-0.284814	-0.082906	-0.175537
14523364	2011	34	21-40	White	II	T2	N1	M0	Regional	Yes	No/Unknown	Alive	69	Alive	0.618093	0.555733	-0.027292	-0.056176
14524702	2010	37	21-40	White	III	T3	N2	M1	Distant	Yes	No/Unknown	Alive	29	Alive	1.8447	2.91055	2.26449	2.98837
14525485	2010	60	41-60	White	I	T1	N0	M0	Localized	Yes	No/Unknown	Alive	78	Alive	0.071422	-0.351317	-0.285629	-0.367709
14526804	2010	43	41-60	Others	I	T1	N0	M0	Localized	Yes	No/Unknown	Alive	75	Alive	0.359727	0.194574	-0.285629	-0.367709
14529076	2011	49	41-60	White	I	T2	N0	M0	Localized	Yes	Yes	Alive	66	Alive	0.071422	0.172504	-0.082906	-0.175537
14529177	2010	1	0-20	White	I	T1	N0	M0	Localized	Yes	No/Unknown	Alive	73	Alive	-1.28845	-1.26595	-0.285629	-0.367709
14529194	2010	35	21-40	White	I	T3	N0	M0	Regional	Yes	No/Unknown	Alive	72	Alive	0.282123	0.291436	0.119817	0.016635
14529202	2010	54	41-60	White	II	T1	N2	M0	Regional	Yes	No/Unknown	Alive	52	Alive	1.29803	0.892132	-0.174402	-0.128986
14529909	2011	48	41-60	White	II	T1	N3	M0	Regional	Yes	No/Unknown	Alive	66	Alive	1.29803	0.892132	-0.118788	-0.009625
14530351	2010	38	21-40	White	I	T2	N0	M0	Localized	Yes	No/Unknown	Alive	75	Alive	-0.608511	-0.687716	-0.082906	-0.175537
14534037	2011	54	41-60	White	III	T3	N2	M1	Distant	Yes	No/Unknown	Alive	66	Alive	2.52463	3.36787	2.26449	2.98837
14534660	2011	25	21-40	White	II	T2	N2	M0	Regional	Yes	No/Unknown	Alive	70	Alive	0.618093	0.555733	0.028322	0.063186
14535018	2010	35	21-40	White	I	T1	N0	M0	Localized	Yes	Yes	Alive	74	Alive	-0.608511	-0.405734	-0.285629	-0.367709
14535696	2010	27	21-40	White	I	T2	N0	M0	Localized	Yes	No/Unknown	Alive	75	Alive	-0.608511	-0.687716	-0.082906	-0.175537
14535706	2010	51	41-60	White	I	T2	N0	M0	Localized	Yes	Yes	Alive	73	Alive	0.071422	0.172504	-0.082906	-0.175537
14535768	2010	21	21-40	White	I	T1	N0	M0	Localized	Yes	No/Unknown	Alive	73	Alive	-0.608511	-0.808636	-0.285629	-0.367709
14535831	2010	32	21-40	White	I	T1	N0	M0	Localized	Yes	Yes	Alive	3	Alive	-0.608511	-0.405734	-0.285629	-0.367709
14537057	2010	32	21-40	White	I	T2	N0	M0	Localized	Yes	No/Unknown	Alive	75	Alive	-0.608511	-0.687716	-0.082906	-0.175537
14537115	2010	45	41-60	White	I	T1	N0	M0	Localized	Yes	No/Unknown	Alive	72	Alive	0.071422	-0.351317	-0.285629	-0.367709
14539505	2011	40	21-40	White	I	T1	N0	M0	Localized	Yes	Yes	Alive	71	Alive	-0.608511	-0.405734	-0.285629	-0.367709
14540449	2010	34	21-40	White	I	T1	N0	M0	Localized	Yes	No/Unknown	Alive	83	Alive	-0.608511	-0.808636	-0.285629	-0.367709
14541055	2011	26	21-40	White	I	T1	N0	M0	Localized	Yes	No/Unknown	Alive	10	Alive	-0.608511	-0.808636	-0.285629	-0.367709
14542036	2011	17	0-20	White	I	T1	N0	M0	Localized	Yes	No/Unknown	Alive	64	Alive	-1.28845	-1.26595	-0.285629	-0.367709
14542715	2011	34	21-40	White	I	T2	N0	M0	Localized	Yes	No/Unknown	Alive	61	Alive	-0.608511	-0.687716	-0.082906	-0.175537
14542775	2011	49	41-60	White	I	T1	N0	M0	Localized	Yes	Yes	Alive	70	Alive	0.071422	0.051585	-0.285629	-0.367709
14543001	2011	34	21-40	White	I	T1	N0	M0	Localized	Yes	Yes	Alive	67	Alive	-0.608511	-0.405734	-0.285629	-0.367709
14544568	2011	45	41-60	White	III	T1	N2	M1	Distant	Yes	No/Unknown	Testis	7	Dead	2.52463	3.12603	1.85905	2.60403
14544759	2011	18	0-20	White	I	T1	N0	M0	Localized	Yes	No/Unknown	Alive	69	Alive	-1.28845	-1.26595	-0.285629	-0.367709
14545272	2011	18	0-20	White	I	T2	N0	M0	Localized	Yes	No/Unknown	Alive	64	Alive	-1.28845	-1.14504	-0.082906	-0.175537
14545383	2011	56	41-60	White	II	T1	N2	M0	Regional	Yes	Yes	Alive	71	Alive	1.29803	1.29503	-0.174402	-0.128986
14545618	2011	39	21-40	White	I	T1	N0	M0	Localized	Yes	No/Unknown	Alive	71	Alive	-0.608511	-0.808636	-0.285629	-0.367709
14546931	2011	32	21-40	White	I	T1	N0	M0	Localized	Yes	Yes	Alive	60	Alive	-0.608511	-0.405734	-0.285629	-0.367709
14547046	2011	22	21-40	White	I	T2	N0	M0	Localized	Yes	Yes	Alive	67	Alive	-0.608511	-0.284814	-0.082906	-0.175537
14547803	2011	45	41-60	White	III	T1	N3	M1	Distant	Yes	No/Unknown	Miscellaneous Malignant Cancer	25	Dead	2.52463	3.12603	1.91466	2.72339
14549601	2011	40	21-40	White	II	T1	N2	M0	Regional	Yes	No/Unknown	Alive	52	Alive	0.618093	0.434813	-0.174402	-0.128986
14549716	2011	25	21-40	White	I	T1	N0	M0	Localized	Yes	No/Unknown	Alive	62	Alive	-0.608511	-0.808636	-0.285629	-0.367709
14549723	2011	21	21-40	White	I	T1	N0	M0	Localized	Yes	No/Unknown	Alive	61	Alive	-0.608511	-0.808636	-0.285629	-0.367709
14549744	2011	36	21-40	White	I	T2	N0	M0	Localized	Yes	Yes	Alive	62	Alive	-0.608511	-0.284814	-0.082906	-0.175537
14549898	2011	19	0-20	White	I	T1	N0	M0	Localized	Yes	No/Unknown	Alive	70	Alive	-1.28845	-1.26595	-0.285629	-0.367709
14550518	2011	35	21-40	White	I	T1	N0	M0	Localized	Yes	No/Unknown	Alive	67	Alive	-0.608511	-0.808636	-0.285629	-0.367709
14550621	2011	31	21-40	White	II	T2	N2	M0	Regional	Yes	No/Unknown	Alive	9	Alive	0.618093	0.555733	0.028322	0.063186
14550643	2011	39	21-40	White	I	T2	N0	M0	Localized	Yes	No/Unknown	Alive	62	Alive	-0.608511	-0.687716	-0.082906	-0.175537
14551041	2011	43	41-60	White	I	T2	N0	M0	Localized	Yes	No/Unknown	Alive	55	Alive	0.071422	-0.230397	-0.082906	-0.175537
14551310	2011	27	21-40	White	I	T1	N0	M0	Localized	Yes	No/Unknown	Alive	64	Alive	-0.608511	-0.808636	-0.285629	-0.367709
14551410	2011	32	21-40	White	II	T3	N2	M0	Regional	Yes	No/Unknown	Alive	60	Alive	0.618093	0.676653	0.231045	0.255358
14551708	2011	34	21-40	White	I	T1	N0	M0	Localized	Yes	No/Unknown	Alive	61	Alive	-0.608511	-0.808636	-0.285629	-0.367709
14551712	2011	34	21-40	White	I	T1	N0	M0	Localized	Yes	No/Unknown	Alive	61	Alive	-0.608511	-0.808636	-0.285629	-0.367709
14552219	2011	45	41-60	White	I	T2	N0	M0	Localized	Yes	No/Unknown	Alive	61	Alive	0.071422	-0.230397	-0.082906	-0.175537
14552270	2011	42	41-60	White	II	T1	N2	M0	Regional	Yes	No/Unknown	Alive	69	Alive	1.29803	0.892132	-0.174402	-0.128986
14552939	2012	48	41-60	Black	I	T2	N0	M0	Localized	Yes	Yes	Alive	59	Alive	0.215574	0.44545	-0.082906	-0.175537
14552946	2011	61	>60	White	I	T1	N0	M0	Localized	Yes	No/Unknown	Alive	64	Alive	0.751355	0.106002	-0.285629	-0.367709
14553815	2011	37	21-40	White	I	T1	N0	M0	Localized	Yes	No/Unknown	Alive	67	Alive	-0.608511	-0.808636	-0.285629	-0.367709
14553870	2011	46	41-60	White	I	T1	N0	M0	Localized	Yes	No/Unknown	Alive	60	Alive	0.071422	-0.351317	-0.285629	-0.367709
14554834	2011	26	21-40	White	I	T1	N0	M0	Localized	Yes	No/Unknown	Alive	64	Alive	-0.608511	-0.808636	-0.285629	-0.367709
14555309	2012	45	41-60	White	I	T1	N0	M0	Localized	Yes	Yes	Alive	59	Alive	0.071422	0.051585	-0.285629	-0.367709
14555973	2011	61	>60	White	I	T1	N0	M0	Localized	Yes	No/Unknown	Alive	69	Alive	0.751355	0.106002	-0.285629	-0.367709
14559884	2011	21	21-40	Black	I	T1	N0	M0	Localized	Yes	No/Unknown	Alive	70	Alive	-0.464359	-0.53569	-0.285629	-0.367709
14561412	2011	32	21-40	Others	II	T2	N2	M0	Regional	Yes	No/Unknown	Alive	63	Alive	0.906397	1.10162	0.028322	0.063186
14561413	2011	51	41-60	White	I	T1	N0	M0	Localized	Yes	No/Unknown	Alive	44	Alive	0.071422	-0.351317	-0.285629	-0.367709
14561414	2011	48	41-60	White	I	T1	N0	M0	Localized	Yes	No/Unknown	Alive	67	Alive	0.071422	-0.351317	-0.285629	-0.367709
14561701	2010	51	41-60	Black	II	T3	N1	M0	Regional	Yes	No/Unknown	Alive	39	Alive	1.44218	1.40692	0.175431	0.135997
14563110	2011	19	0-20	White	I	T1	N0	M0	Localized	Yes	No/Unknown	Alive	60	Alive	-1.28845	-1.26595	-0.285629	-0.367709
14563521	2011	33	21-40	White	I	T1	N0	M0	Localized	Yes	No/Unknown	Alive	64	Alive	-0.608511	-0.808636	-0.285629	-0.367709
14563783	2011	37	21-40	White	II	T1	N2	M0	Regional	Yes	No/Unknown	Alive	63	Alive	0.618093	0.434813	-0.174402	-0.128986
14567002	2011	37	21-40	White	I	T1	N0	M0	Localized	Yes	No/Unknown	Alive	61	Alive	-0.608511	-0.808636	-0.285629	-0.367709
14567980	2011	22	21-40	White	I	T1	N0	M0	Localized	Yes	No/Unknown	Alive	60	Alive	-0.608511	-0.808636	-0.285629	-0.367709
14568835	2011	22	21-40	White	I	T1	N0	M0	Localized	Yes	No/Unknown	Alive	65	Alive	-0.608511	-0.808636	-0.285629	-0.367709
14569194	2011	33	21-40	White	I	T1	N0	M0	Localized	Yes	No/Unknown	Diseases of Heart	50	Dead	-0.608511	-0.808636	-0.285629	-0.367709
14569749	2011	44	41-60	White	I	T3	N0	M0	Regional	Yes	No/Unknown	Alive	64	Alive	0.962056	0.748754	0.119817	0.016635
14571671	2011	38	21-40	White	I	T1	N0	M0	Localized	Yes	No/Unknown	Alive	46	Alive	-0.608511	-0.808636	-0.285629	-0.367709
14571951	2011	21	21-40	White	I	T1	N0	M0	Localized	Yes	No/Unknown	Alive	55	Alive	-0.608511	-0.808636	-0.285629	-0.367709
14572637	2011	46	41-60	White	I	T1	N0	M0	Localized	Yes	No/Unknown	Alive	62	Alive	0.071422	-0.351317	-0.285629	-0.367709
14572646	2011	52	41-60	White	I	T1	N0	M0	Regional	Yes	Yes	Alive	69	Alive	0.962056	0.909816	-0.285629	-0.367709
14575399	2012	28	21-40	White	III	T1	N0	M1	Distant	Yes	No/Unknown	Alive	56	Alive	1.8447	2.66871	1.74782	2.36531
14577171	2012	29	21-40	White	I	T2	N0	M0	Localized	Yes	Yes	Alive	51	Alive	-0.608511	-0.284814	-0.082906	-0.175537
14577327	2012	21	21-40	White	II	T1	N1	M0	Regional	Yes	No/Unknown	Alive	59	Alive	0.618093	0.434813	-0.230016	-0.248348
14577500	2012	50	41-60	White	III	T1	N2	M0	Regional	Yes	No/Unknown	Alive	52	Alive	1.634	1.27735	-0.174402	-0.128986
14577756	2011	46	41-60	White	I	T1	N0	M0	Localized	Yes	Yes	Alive	60	Alive	0.071422	0.051585	-0.285629	-0.367709
14577826	2012	37	21-40	White	I	T1	N0	M0	Localized	Yes	No/Unknown	Alive	58	Alive	-0.608511	-0.808636	-0.285629	-0.367709
14577982	2011	29	21-40	White	I	T1	N0	M0	Localized	Yes	No/Unknown	Alive	66	Alive	-0.608511	-0.808636	-0.285629	-0.367709
14578908	2012	25	21-40	White	I	T2	N0	M0	Localized	Yes	No/Unknown	Alive	56	Alive	-0.608511	-0.687716	-0.082906	-0.175537
14581040	2012	34	21-40	White	I	T1	N0	M0	Localized	Yes	Yes	Alive	57	Alive	-0.608511	-0.405734	-0.285629	-0.367709
14582548	2012	44	41-60	White	I	T1	N0	M0	Localized	Yes	Yes	Alive	56	Alive	0.071422	0.051585	-0.285629	-0.367709
14583025	2012	44	41-60	White	I	T1	N0	M0	Localized	Yes	No/Unknown	Alive	51	Alive	0.071422	-0.351317	-0.285629	-0.367709
[truncated: 13,516 more rows]

## Sheet: test_set
Patient ID	Year of diagnosis	Age at diagnosis	Age4	Race	AJCC_stage	T_stage	N_stage	M_stage	SEER_stage	Surgery	Radiotherapy	CSS	Survival_months	OS	NomogramOS	NomogramCSS	TNMOS	TNMCSS
2922691	2004	47	41-60	White	I	T1	N0	M0	Localized	Yes	Yes	Alive	151	Alive	-0.018875	-0.323833	-0.306634	-0.364024
2923880	2004	21	21-40	White	I	T1	N0	M0	Localized	Yes	No/Unknown	Alive	152	Alive	-0.596729	-0.557768	-0.306634	-0.364024
2924609	2004	49	41-60	White	I	T1	N0	M0	Localized	Yes	No/Unknown	Alive	151	Alive	-0.018875	-0.412257	-0.306634	-0.364024
2924810	2004	34	21-40	White	I	T1	N0	M0	Localized	Yes	Yes	Alive	155	Alive	-0.596729	-0.469344	-0.306634	-0.364024
2940876	2004	34	21-40	White	I	T1	N0	M0	Localized	Yes	No/Unknown	Symptoms, Signs and Ill-Defined Conditions	43	Dead	-0.596729	-0.557768	-0.306634	-0.364024
2941110	2004	46	41-60	White	I	T1	N0	M0	Localized	Yes	Yes	Alive	149	Alive	-0.018875	-0.323833	-0.306634	-0.364024
2941523	2004	37	21-40	White	I	T1	N0	M0	Localized	Yes	No/Unknown	Alive	151	Alive	-0.596729	-0.557768	-0.306634	-0.364024
2961900	2004	32	21-40	White	I	T1	N0	M0	Localized	Yes	Yes	Alive	151	Alive	-0.596729	-0.469344	-0.306634	-0.364024
2965528	2004	34	21-40	White	III	T1	N3	M0	Regional	Yes	No/Unknown	Alive	148	Alive	1.22502	0.701022	0.333394	0.167995
2966096	2004	27	21-40	White	I	T2	N0	M0	Localized	Yes	Yes	Alive	146	Alive	-0.596729	-0.435511	-0.198577	-0.288248
2969283	2005	33	21-40	White	I	T1	N0	M0	Localized	Yes	Yes	Alive	143	Alive	-0.596729	-0.469344	-0.306634	-0.364024
2973954	2004	28	21-40	White	III	T3	N1	M1	Distant	Yes	No/Unknown	Alive	151	Alive	2.03231	3.01006	2.20537	2.9333
2974234	2004	28	21-40	White	III	T2	N1	M1	Distant	Yes	No/Unknown	Alive	147	Alive	2.03231	2.97623	2.09732	2.85752
2975402	2004	33	21-40	White	I	T1	N0	M0	Localized	Yes	Yes	Alive	147	Alive	-0.596729	-0.469344	-0.306634	-0.364024
2976091	2004	18	0-20	White	I	T1	N0	M0	Localized	Yes	Yes	Alive	149	Alive	-1.17458	-0.614855	-0.306634	-0.364024
2976457	2004	1	0-20	Others	I	T1	N0	M0	Localized	Yes	No/Unknown	Alive	151	Alive	-1.0675	-0.699795	-0.306634	-0.364024
2976462	2004	37	21-40	White	I	T1	N0	M0	Localized	Yes	Yes	Alive	150	Alive	-0.596729	-0.469344	-0.306634	-0.364024
2977028	2004	29	21-40	White	I	T1	N0	M0	Localized	Yes	No/Unknown	Alive	148	Alive	-0.596729	-0.557768	-0.306634	-0.364024
2977527	2004	29	21-40	White	II	T1	N3	M0	Regional	Yes	No/Unknown	Alive	132	Alive	0.717788	0.416863	0.333394	0.167995
2980900	2004	42	41-60	White	I	T2	N0	M0	Localized	Yes	Yes	Alive	126	Alive	-0.018875	-0.29	-0.198577	-0.288248
2983889	2004	25	21-40	White	I	T1	N0	M0	Localized	Yes	No/Unknown	Alive	145	Alive	-0.596729	-0.557768	-0.306634	-0.364024
2984476	2004	20	0-20	White	I	T1	N0	M0	Localized	Yes	Yes	Alive	149	Alive	-1.17458	-0.614855	-0.306634	-0.364024
2988720	2004	96	>60	White	I	T1	N0	M0	Localized	Yes	No/Unknown	Diseases of Heart	27	Dead	0.558979	-0.266746	-0.306634	-0.364024
2989292	2004	51	41-60	Black	I	T1	N0	M0	Localized	Yes	Yes	Alive	155	Alive	0.034665	-0.322091	-0.306634	-0.364024
2990356	2005	22	21-40	White	II	T1	N1	M0	Regional	Yes	No/Unknown	Alive	142	Alive	0.717788	0.416863	-0.093292	-0.186684
2991186	2005	23	21-40	Others	I	T1	N0	M0	Localized	Yes	No/Unknown	Alive	142	Alive	-0.489648	-0.554284	-0.306634	-0.364024
3404065	2005	27	21-40	Others	I	T2	N0	M0	Localized	Yes	No/Unknown	Alive	140	Alive	-0.489648	-0.520451	-0.198577	-0.288248
3405053	2005	28	21-40	Others	I	T1	N0	M0	Localized	Yes	Yes	Alive	136	Alive	-0.489648	-0.465861	-0.306634	-0.364024
3406950	2005	42	41-60	White	I	T2	N0	M0	Localized	Yes	Yes	Alive	137	Alive	-0.018875	-0.29	-0.198577	-0.288248
3408946	2005	31	21-40	Others	I	T2	N0	M0	Localized	Yes	No/Unknown	Alive	138	Alive	-0.489648	-0.520451	-0.198577	-0.288248
3410335	2005	52	41-60	White	I	T1	N0	M0	Localized	Yes	Yes	Alive	136	Alive	-0.018875	-0.323833	-0.306634	-0.364024
3412526	2005	28	21-40	White	I	T1	N0	M0	Localized	Yes	Yes	Alive	138	Alive	-0.596729	-0.469344	-0.306634	-0.364024
3412539	2005	25	21-40	White	III	T1	N1	M0	Regional	Yes	No/Unknown	Alive	142	Alive	1.22502	0.701022	-0.093292	-0.186684
3412545	2005	39	21-40	White	II	T1	N1	M0	Regional	Yes	No/Unknown	Alive	139	Alive	0.717788	0.416863	-0.093292	-0.186684
3413807	2005	30	21-40	White	I	T1	N0	M0	Localized	Yes	No/Unknown	Alive	135	Alive	-0.596729	-0.557768	-0.306634	-0.364024
3415395	2005	40	21-40	White	I	T1	N0	M0	Localized	Yes	Yes	Alive	134	Alive	-0.596729	-0.469344	-0.306634	-0.364024
3416503	2005	54	41-60	White	I	T1	N0	M0	Localized	Yes	No/Unknown	Alive	139	Alive	-0.018875	-0.412257	-0.306634	-0.364024
3417150	2005	48	41-60	White	I	T1	N0	M0	Localized	Yes	No/Unknown	Alive	136	Alive	-0.018875	-0.412257	-0.306634	-0.364024
3417669	2005	29	21-40	White	I	T1	N0	M0	Localized	Yes	No/Unknown	Alive	137	Alive	-0.596729	-0.557768	-0.306634	-0.364024
3418145	2005	38	21-40	White	I	T1	N0	M0	Localized	Yes	Yes	Alive	133	Alive	-0.596729	-0.469344	-0.306634	-0.364024
3419950	2005	40	21-40	White	III	T2	N1	M1	Distant	Yes	No/Unknown	Alive	133	Alive	2.03231	2.97623	2.09732	2.85752
3421105	2005	40	21-40	White	I	T2	N0	M0	Localized	Yes	No/Unknown	Alive	138	Alive	-0.596729	-0.523934	-0.198577	-0.288248
3422662	2005	33	21-40	White	III	T3	N3	M1	Regional	Yes	No/Unknown	Alive	132	Alive	1.22502	2.31959	2.63206	3.28797
3427981	2005	47	41-60	White	I	T1	N0	M0	Localized	Yes	Yes	Other Cause of Death	84	Dead	-0.018875	-0.323833	-0.306634	-0.364024
3431445	2006	33	21-40	White	III	T1	N0	M1	Distant	Yes	No/Unknown	Alive	84	Alive	2.03231	2.94239	1.77591	2.6044
3431553	2006	42	41-60	White	I	T1	N0	M0	Localized	Yes	Yes	Alive	31	Alive	-0.018875	-0.323833	-0.306634	-0.364024
3435154	2006	44	41-60	White	I	T1	N0	M0	Localized	Yes	No/Unknown	Alive	128	Alive	-0.018875	-0.412257	-0.306634	-0.364024
3436689	2006	26	21-40	White	I	T1	N0	M0	Localized	Yes	Yes	Alive	127	Alive	-0.596729	-0.469344	-0.306634	-0.364024
3436974	2004	25	21-40	White	I	T2	N0	M0	Localized	Yes	No/Unknown	Accidents and Adverse Effects	15	Dead	-0.596729	-0.523934	-0.198577	-0.288248
3437403	2006	15	0-20	White	I	T1	N0	M0	Localized	Yes	No/Unknown	Alive	126	Alive	-1.17458	-0.703279	-0.306634	-0.364024
3438212	2006	41	41-60	Others	I	T1	N0	M0	Localized	Yes	Yes	Alive	124	Alive	0.088206	-0.32035	-0.306634	-0.364024
3438581	2005	37	21-40	White	I	T1	N0	M0	Localized	Yes	No/Unknown	Alive	38	Alive	-0.596729	-0.557768	-0.306634	-0.364024
3439139	2006	50	41-60	White	I	T2	N0	M0	Localized	Yes	No/Unknown	Alive	125	Alive	-0.018875	-0.378423	-0.198577	-0.288248
3441930	2006	34	21-40	White	I	T1	N0	M0	Localized	Yes	No/Unknown	Alive	126	Alive	-0.596729	-0.557768	-0.306634	-0.364024
3442166	2005	26	21-40	White	I	T2	N0	M0	Localized	Yes	No/Unknown	Alive	138	Alive	-0.596729	-0.523934	-0.198577	-0.288248
3442746	2006	35	21-40	White	I	T1	N0	M0	Localized	Yes	No/Unknown	Alive	49	Alive	-0.596729	-0.557768	-0.306634	-0.364024
3443268	2006	25	21-40	White	II	T1	N1	M0	Regional	Yes	No/Unknown	Alive	127	Alive	0.717788	0.416863	-0.093292	-0.186684
[truncated: 15,458 more rows]
